# Supplementary material for: A spatial single-cell type multiplex map of human spermatogenesis
Source: bioRxiv preprint, doi:10.1101/2024.10.21.619380, version 3 (2026-05-27)
Supplement: Supplementary Table 5 [file 619380_file13.xlsx]

## Sheet: Supplementary table 5
Supplementary Table 5. Deep annotation data. Proteins stained with IHC in testis samples (available on the proteinatlas.org) were deep annotated by recording the presence, intensity, quantity and subcellular location in each of the eight cell types.
ensg_id	ab_id	Leydig cells present	Leydig cells intensity	Leydig cells quantity	Leydig cells loc	elongated or late spermatids present	elongated or late spermatids intensity	elongated or late spermatids quantity	elongated or late spermatids loc	pachytene spermatocytes present	pachytene spermatocytes intensity	pachytene spermatocytes quantity	pachytene spermatocytes loc	peritubular cells present	peritubular cells intensity	peritubular cells quantity	peritubular cells loc	preleptotene spermatocytes present	preleptotene spermatocytes intensity	preleptotene spermatocytes quantity	preleptotene spermatocytes loc	round or early spermatids present	round or early spermatids intensity	round or early spermatids quantity	round or early spermatids loc	sertoli cells present	sertoli cells intensity	sertoli cells quantity	sertoli cells loc	spermatogonia cells present	spermatogonia cells intensity	spermatogonia cells quantity	spermatogonia cells loc
ENSG00000002586	CAB000020	yes	moderate	75%-25%	membrane	yes	strong	75%-25%	cytoplasmic	yes	strong	75%-25%	membrane	yes	moderate	>75%	membrane	yes	strong	>75%	membrane	yes	negative	not set	not set	yes	strong	>75%	membrane	yes	strong	75%-25%	membrane
ENSG00000185499	CAB000036	yes	negative	not set	not set	yes	moderate	75%-25%	cytoplasmic	yes	negative	not set	not set	yes	negative	not set	not set	yes	negative	not set	not set	yes	negative	not set	not set	yes	negative	not set	not set	yes	negative	not set	not set
ENSG00000123999	CAB000047	yes	strong	>75%	cytoplasmic,membrane	yes	negative	not set	not set	yes	negative	not set	not set	yes	negative	not set	not set	yes	negative	not set	not set	yes	negative	not set	not set	yes	strong	>75%	cytoplasmic,membrane	yes	negative	not set	not set
ENSG00000172037	CAB000053	yes	negative	not set	not set	yes	negative	not set	not set	yes	moderate	<25%	cytoplasmic	yes	moderate	<25%	cytoplasmic	yes	moderate	<25%	cytoplasmic	yes	negative	not set	not set	yes	negative	not set	not set	yes	negative	not set	not set
ENSG00000120215	CAB000057	yes	moderate	>75%	cytoplasmic,membrane	yes	negative	not set	not set	yes	negative	not set	not set	yes	negative	not set	not set	yes	negative	not set	not set	yes	negative	not set	not set	yes	moderate	>75%	cytoplasmic,membrane	yes	negative	not set	not set
ENSG00000148773	CAB000058	yes	negative	not set	not set	yes	negative	not set	not set	yes	moderate	75%-25%	nuclear	yes	negative	not set	not set	yes	strong	<25%	nuclear	yes	negative	not set	not set	yes	negative	not set	not set	yes	strong	<25%	nuclear
ENSG00000160307	CAB000073	yes	negative	not set	not set	yes	negative	not set	not set	yes	negative	not set	not set	yes	negative	not set	not set	yes	negative	not set	not set	yes	negative	not set	not set	yes	moderate	<25%	cytoplasmic,nuclear	yes	negative	not set	not set
ENSG00000026025	CAB000080	yes	strong	>75%	cytoplasmic	yes	negative	not set	not set	yes	strong	75%-25%	cytoplasmic,nuclear	yes	strong	>75%	cytoplasmic	yes	strong	>75%	cytoplasmic	yes	negative	not set	not set	yes	strong	>75%	cytoplasmic	yes	strong	>75%	cytoplasmic
ENSG00000073282	CAB000083	yes	negative	not set	not set	yes	moderate	>75%	cytoplasmic	yes	negative	not set	not set	yes	negative	not set	not set	yes	negative	not set	not set	yes	negative	not set	not set	yes	negative	not set	not set	yes	negative	not set	not set
ENSG00000135679	CAB000086	yes	moderate	75%-25%	nuclear	yes	negative	not set	not set	yes	strong	>75%	nuclear	yes	strong	>75%	nuclear	yes	strong	>75%	nuclear	yes	strong	>75%	nuclear	yes	negative	not set	not set	yes	strong	>75%	nuclear
ENSG00000100297	CAB000101	yes	negative	not set	not set	yes	negative	not set	not set	yes	moderate	75%-25%	nuclear	yes	negative	not set	not set	yes	strong	>75%	nuclear	yes	negative	not set	not set	yes	negative	not set	not set	yes	strong	<25%	nuclear
ENSG00000149311	CAB000102	yes	moderate	>75%	nuclear	yes	negative	not set	not set	yes	moderate	75%-25%	nuclear	yes	negative	not set	not set	yes	moderate	75%-25%	nuclear	yes	moderate	75%-25%	nuclear	yes	weak	75%-25%	nuclear	yes	moderate	<25%	nuclear
ENSG00000172137	CAB000106	yes	strong	>75%	cytoplasmic	yes	negative	not set	not set	yes	negative	not set	not set	yes	negative	not set	not set	yes	negative	not set	not set	yes	negative	not set	not set	yes	negative	not set	not set	yes	negative	not set	not set
ENSG00000117984	CAB000109	yes	moderate	75%-25%	cytoplasmic	yes	negative	not set	not set	yes	negative	not set	not set	yes	negative	not set	not set	yes	negative	not set	not set	yes	negative	not set	not set	yes	strong	<25%	cytoplasmic	yes	negative	not set	not set
ENSG00000145386	CAB000114	yes	negative	not set	not set	yes	negative	not set	not set	yes	negative	not set	not set	yes	negative	not set	not set	yes	negative	not set	not set	yes	negative	not set	not set	yes	negative	not set	not set	yes	strong	<25%	nuclear
ENSG00000134057	CAB000115	yes	negative	not set	not set	yes	negative	not set	not set	yes	moderate	<25%	cytoplasmic	yes	negative	not set	not set	yes	moderate	<25%	cytoplasmic	yes	negative	not set	not set	yes	negative	not set	not set	yes	moderate	<25%	cytoplasmic
ENSG00000101439	CAB000118	yes	strong	>75%	cytoplasmic	yes	negative	not set	not set	yes	negative	not set	not set	yes	negative	not set	not set	yes	negative	not set	not set	yes	negative	not set	not set	yes	strong	>75%	cytoplasmic	yes	negative	not set	not set
ENSG00000143799	CAB000147	yes	negative	not set	not set	yes	negative	not set	not set	yes	negative	not set	not set	yes	negative	not set	not set	yes	negative	not set	not set	yes	strong	<25%	nuclear	yes	negative	not set	not set	yes	strong	<25%	nuclear
ENSG00000072274	CAB000153	yes	strong	<25%	cytoplasmic	yes	negative	not set	not set	yes	moderate	75%-25%	cytoplasmic	yes	negative	not set	not set	yes	negative	not set	not set	yes	negative	not set	not set	yes	negative	not set	not set	yes	negative	not set	not set
ENSG00000136936	CAB000155	yes	weak	75%-25%	nuclear	yes	negative	not set	not set	yes	moderate	>75%	nuclear	yes	negative	not set	not set	yes	moderate	>75%	nuclear	yes	negative	not set	not set	yes	moderate	>75%	nuclear	yes	moderate	75%-25%	nuclear
ENSG00000175595	CAB000156	yes	moderate	75%-25%	nuclear	yes	negative	not set	not set	yes	moderate	75%-25%	nuclear	yes	negative	not set	not set	yes	negative	not set	not set	yes	weak	>75%	nuclear	yes	moderate	>75%	nuclear	yes	negative	not set	not set
ENSG00000157502	HPA000168	yes	moderate	75%-25%	nuclear	yes	negative	not set	not set	yes	moderate	75%-25%	cytoplasmic,membrane	yes	negative	not set	not set	yes	strong	75%-25%	nuclear	yes	moderate	75%-25%	cytoplasmic	yes	negative	not set	not set	yes	negative	not set	not set
ENSG00000169895	HPA000175	yes	negative	not set	not set	yes	strong	>75%	cytoplasmic,membrane	yes	negative	not set	not set	yes	negative	not set	not set	yes	negative	not set	not set	yes	strong	>75%	cytoplasmic	yes	weak	>75%	cytoplasmic,membrane	yes	negative	not set	not set
ENSG00000102145	HPA000232	yes	negative	not set	not set	yes	negative	not set	not set	yes	strong	<25%	nuclear	yes	negative	not set	not set	yes	negative	not set	not set	yes	strong	75%-25%	nuclear	yes	negative	not set	not set	yes	negative	not set	not set
ENSG00000160211	HPA000247	yes	weak	75%-25%	cytoplasmic	yes	negative	not set	not set	yes	negative	not set	not set	yes	negative	not set	not set	yes	negative	not set	not set	yes	negative	not set	not set	yes	strong	>75%	cytoplasmic	yes	negative	not set	not set
ENSG00000156504	HPA000266	yes	strong	75%-25%	nuclear	yes	negative	not set	not set	yes	negative	not set	not set	yes	negative	not set	not set	yes	negative	not set	not set	yes	negative	not set	not set	yes	strong	>75%	cytoplasmic,nuclear	yes	negative	not set	not set
ENSG00000131773	HPA000275	yes	negative	not set	not set	yes	moderate	75%-25%	cytoplasmic	yes	strong	>75%	nuclear	yes	negative	not set	not set	yes	strong	>75%	nuclear	yes	strong	>75%	nuclear	yes	moderate	>75%	nuclear	yes	strong	75%-25%	nuclear
ENSG00000130234	HPA000288	yes	strong	>75%	cytoplasmic	yes	negative	not set	not set	yes	negative	not set	not set	yes	negative	not set	not set	yes	negative	not set	not set	yes	negative	not set	not set	yes	strong	>75%	cytoplasmic,membrane	yes	negative	not set	not set
ENSG00000130985	HPA000289	yes	negative	not set	not set	yes	negative	not set	not set	yes	negative	not set	not set	yes	negative	not set	not set	yes	negative	not set	not set	yes	negative	not set	not set	yes	moderate	<25%	nuclear	yes	moderate	75%-25%	nuclear
ENSG00000073111	CAB000303	yes	negative	not set	not set	yes	negative	not set	not set	yes	moderate	<25%	nuclear	yes	negative	not set	not set	yes	strong	75%-25%	nuclear	yes	negative	not set	not set	yes	negative	not set	not set	yes	negative	not set	not set
ENSG00000184937	CAB000327	yes	negative	not set	not set	yes	negative	not set	not set	yes	negative	not set	not set	yes	negative	not set	not set	yes	negative	not set	not set	yes	negative	not set	not set	yes	strong	>75%	nuclear	yes	negative	not set	not set
ENSG00000125952	CAB000328	yes	moderate	75%-25%	nuclear	yes	negative	not set	not set	yes	moderate	75%-25%	nuclear	yes	strong	75%-25%	nuclear	yes	moderate	75%-25%	nuclear	yes	negative	not set	not set	yes	moderate	>75%	nuclear	yes	moderate	75%-25%	nuclear
ENSG00000113328	CAB000350	yes	negative	not set	not set	yes	negative	not set	not set	yes	negative	not set	not set	yes	negative	not set	not set	yes	strong	>75%	nuclear	yes	negative	not set	not set	yes	negative	not set	not set	yes	strong	>75%	nuclear
ENSG00000196924	CAB000356	yes	negative	not set	not set	yes	negative	not set	not set	yes	negative	not set	not set	yes	strong	>75%	cytoplasmic	yes	negative	not set	not set	yes	negative	not set	not set	yes	moderate	75%-25%	cytoplasmic	yes	negative	not set	not set
ENSG00000204977	HPA000367	yes	negative	not set	not set	yes	negative	not set	not set	yes	moderate	<25%	cytoplasmic	yes	negative	not set	not set	yes	moderate	<25%	cytoplasmic	yes	negative	not set	not set	yes	negative	not set	not set	yes	negative	not set	not set
ENSG00000158321	HPA000390	yes	negative	not set	not set	yes	negative	not set	not set	yes	moderate	75%-25%	nuclear	yes	negative	not set	not set	yes	moderate	75%-25%	nuclear	yes	moderate	75%-25%	nuclear	yes	moderate	>75%	nuclear	yes	moderate	75%-25%	nuclear
ENSG00000133131	HPA000395	yes	negative	not set	not set	yes	negative	not set	not set	yes	negative	not set	not set	yes	negative	not set	not set	yes	negative	not set	not set	yes	negative	not set	not set	yes	weak	>75%	nuclear	yes	moderate	75%-25%	nuclear
ENSG00000125827	HPA000399	yes	moderate	<25%	cytoplasmic,membrane	yes	negative	not set	not set	yes	strong	75%-25%	cytoplasmic	yes	negative	not set	not set	yes	strong	<25%	cytoplasmic	yes	negative	not set	not set	yes	strong	>75%	cytoplasmic	yes	negative	not set	not set
ENSG00000165322	HPA000412	yes	weak	>75%	cytoplasmic	yes	negative	not set	not set	yes	negative	not set	not set	yes	negative	not set	not set	yes	negative	not set	not set	yes	negative	not set	not set	yes	weak	>75%	cytoplasmic	yes	negative	not set	not set
ENSG00000133422	HPA000436	yes	weak	>75%	cytoplasmic,membrane	yes	negative	not set	not set	yes	moderate	>75%	nuclear	yes	negative	not set	not set	yes	moderate	>75%	nuclear	yes	moderate	>75%	nuclear	yes	moderate	75%-25%	cytoplasmic	yes	moderate	>75%	nuclear
ENSG00000147889	CAB000445	yes	moderate	>75%	cytoplasmic,nuclear	yes	strong	>75%	nuclear	yes	weak	>75%	nuclear	yes	negative	not set	not set	yes	moderate	>75%	nuclear	yes	weak	>75%	nuclear	yes	moderate	>75%	cytoplasmic,membrane,nuclear	yes	moderate	>75%	nuclear
ENSG00000130826	HPA000447	yes	moderate	>75%	nuclear	yes	negative	not set	not set	yes	strong	>75%	nuclear	yes	negative	not set	not set	yes	strong	>75%	nuclear	yes	weak	>75%	nuclear	yes	strong	>75%	nuclear	yes	strong	>75%	nuclear
ENSG00000148773	HPA000451	yes	weak	75%-25%	nuclear	yes	weak	75%-25%	cytoplasmic,membrane	yes	negative	not set	not set	yes	negative	not set	not set	yes	negative	not set	not set	yes	moderate	75%-25%	nuclear	yes	negative	not set	not set	yes	negative	not set	not set
ENSG00000165409	CAB000473	yes	moderate	75%-25%	cytoplasmic	yes	negative	not set	not set	yes	negative	not set	not set	yes	negative	not set	not set	yes	negative	not set	not set	yes	negative	not set	not set	yes	weak	<25%	cytoplasmic	yes	negative	not set	not set
ENSG00000112232,ENSG00000131773	HPA000500	yes	negative	not set	not set	yes	negative	not set	not set	yes	strong	>75%	nuclear	yes	negative	not set	not set	yes	strong	75%-25%	nuclear	yes	strong	>75%	nuclear	yes	negative	not set	not set	yes	strong	<25%	nuclear
ENSG00000102241	HPA000504	yes	moderate	<25%	nuclear	yes	negative	not set	not set	yes	moderate	<25%	nuclear	yes	negative	not set	not set	yes	strong	>75%	nuclear	yes	moderate	<25%	nuclear	yes	moderate	75%-25%	nuclear	yes	strong	>75%	nuclear
ENSG00000007350	HPA000505	yes	weak	<25%	cytoplasmic	yes	strong	75%-25%	cytoplasmic	yes	moderate	>75%	cytoplasmic	yes	weak	<25%	cytoplasmic	yes	strong	>75%	cytoplasmic	yes	moderate	>75%	cytoplasmic	yes	negative	not set	not set	yes	strong	>75%	cytoplasmic
ENSG00000198157	HPA000511	yes	moderate	>75%	nuclear	yes	negative	not set	not set	yes	negative	not set	not set	yes	negative	not set	not set	yes	negative	not set	not set	yes	negative	not set	not set	yes	strong	>75%	nuclear	yes	negative	not set	not set
ENSG00000239900	HPA000525	yes	weak	75%-25%	cytoplasmic,nuclear	yes	moderate	>75%	cytoplasmic	yes	strong	>75%	cytoplasmic,nuclear	yes	negative	not set	not set	yes	strong	>75%	cytoplasmic,nuclear	yes	strong	>75%	cytoplasmic,nuclear	yes	moderate	>75%	cytoplasmic	yes	strong	>75%	cytoplasmic,nuclear
ENSG00000196236	HPA000527	yes	strong	>75%	cytoplasmic	yes	strong	>75%	cytoplasmic	yes	strong	75%-25%	cytoplasmic	yes	negative	not set	not set	yes	negative	not set	not set	yes	strong	>75%	cytoplasmic	yes	weak	75%-25%	cytoplasmic	yes	moderate	<25%	cytoplasmic
ENSG00000172404	HPA000534	yes	negative	not set	not set	yes	negative	<25%	cytoplasmic	yes	moderate	75%-25%	cytoplasmic	yes	negative	not set	not set	yes	moderate	<25%	cytoplasmic	yes	moderate	<25%	cytoplasmic	yes	negative	not set	not set	yes	strong	>75%	cytoplasmic
ENSG00000176887	HPA000536	yes	negative	not set	not set	yes	moderate	<25%	cytoplasmic,membrane	yes	negative	not set	not set	yes	negative	not set	not set	yes	negative	not set	not set	yes	negative	not set	not set	yes	negative	not set	not set	yes	moderate	75%-25%	nuclear
ENSG00000069020	HPA000544	yes	negative	not set	not set	yes	negative	not set	not set	yes	strong	75%-25%	nuclear	yes	negative	not set	not set	yes	strong	<25%	nuclear	yes	strong	75%-25%	nuclear	yes	negative	not set	not set	yes	strong	<25%	nuclear
ENSG00000150938	HPA000556	yes	moderate	>75%	cytoplasmic	yes	moderate	>75%	cytoplasmic	yes	negative	not set	not set	yes	negative	not set	not set	yes	negative	not set	not set	yes	negative	not set	not set	yes	moderate	>75%	cytoplasmic	yes	negative	not set	not set
ENSG00000063587	HPA000566	yes	moderate	<25%	nuclear	yes	negative	not set	not set	yes	negative	not set	not set	yes	negative	not set	not set	yes	moderate	75%-25%	nuclear	yes	weak	75%-25%	nuclear	yes	negative	not set	not set	yes	moderate	<25%	nuclear
ENSG00000147383	HPA000571	yes	strong	>75%	cytoplasmic	yes	negative	not set	not set	yes	negative	not set	not set	yes	negative	not set	not set	yes	negative	not set	not set	yes	negative	not set	not set	yes	moderate	>75%	cytoplasmic	yes	negative	not set	not set
ENSG00000169057	HPA000593	yes	strong	75%-25%	nuclear	yes	negative	not set	not set	yes	negative	not set	not set	yes	negative	not set	not set	yes	negative	not set	not set	yes	negative	not set	not set	yes	moderate	>75%	nuclear	yes	moderate	75%-25%	nuclear
ENSG00000184164	HPA000603	yes	moderate	75%-25%	cytoplasmic	yes	negative	not set	not set	yes	negative	not set	not set	yes	negative	not set	not set	yes	negative	not set	not set	yes	moderate	75%-25%	nuclear	yes	negative	not set	not set	yes	negative	not set	not set
ENSG00000093009	HPA000614	yes	weak	>75%	cytoplasmic,nuclear	yes	weak	75%-25%	cytoplasmic	yes	strong	>75%	cytoplasmic,nuclear	yes	weak	75%-25%	cytoplasmic	yes	strong	75%-25%	cytoplasmic	yes	moderate	75%-25%	cytoplasmic,nuclear	yes	weak	>75%	cytoplasmic,membrane	yes	weak	75%-25%	cytoplasmic,nuclear
ENSG00000089289,ENSG00000266826	HPA000634	yes	weak	75%-25%	cytoplasmic,nuclear	yes	moderate	>75%	cytoplasmic	yes	negative	not set	not set	yes	negative	not set	not set	yes	negative	not set	not set	yes	negative	not set	not set	yes	negative	not set	not set	yes	negative	not set	not set
ENSG00000100836,ENSG00000258643	HPA000637	yes	strong	>75%	nuclear	yes	negative	not set	not set	yes	strong	>75%	nuclear	yes	strong	75%-25%	nuclear	yes	strong	>75%	nuclear	yes	strong	75%-25%	nuclear	yes	strong	75%-25%	nuclear	yes	strong	>75%	nuclear
ENSG00000198951	HPA000649	yes	moderate	>75%	cytoplasmic	yes	negative	not set	not set	yes	negative	not set	not set	yes	negative	not set	not set	yes	negative	not set	not set	yes	moderate	75%-25%	nuclear	yes	moderate	>75%	cytoplasmic	yes	negative	not set	not set
ENSG00000100813	HPA000657	yes	negative	not set	not set	yes	negative	not set	not set	yes	strong	>75%	nuclear	yes	negative	not set	not set	yes	negative	not set	not set	yes	strong	75%-25%	nuclear	yes	moderate	>75%	nuclear	yes	negative	not set	not set
ENSG00000196663	HPA000658	yes	negative	not set	not set	yes	negative	not set	not set	yes	negative	not set	not set	yes	negative	not set	not set	yes	negative	not set	not set	yes	negative	not set	not set	yes	strong	>75%	cytoplasmic	yes	negative	not set	not set
ENSG00000100749	HPA000660	yes	negative	not set	not set	yes	negative	not set	not set	yes	strong	75%-25%	nuclear	yes	negative	not set	not set	yes	strong	75%-25%	nuclear	yes	strong	>75%	nuclear	yes	negative	not set	not set	yes	moderate	<25%	nuclear
ENSG00000099995	HPA000690	yes	moderate	<25%	nuclear	yes	moderate	<25%	cytoplasmic	yes	strong	75%-25%	nuclear	yes	negative	not set	not set	yes	strong	75%-25%	nuclear	yes	strong	>75%	nuclear	yes	strong	75%-25%	nuclear	yes	strong	>75%	nuclear
ENSG00000100281	HPA000725	yes	negative	not set	not set	yes	negative	not set	not set	yes	negative	not set	not set	yes	negative	not set	not set	yes	negative	not set	not set	yes	negative	not set	not set	yes	moderate	>75%	nuclear	yes	negative	not set	not set
ENSG00000126803	HPA000798	yes	negative	not set	not set	yes	strong	>75%	cytoplasmic	yes	moderate	75%-25%	cytoplasmic,nuclear	yes	negative	not set	not set	yes	negative	not set	not set	yes	strong	>75%	cytoplasmic,nuclear	yes	negative	not set	not set	yes	negative	not set	not set
ENSG00000100425	HPA000807	yes	negative	not set	not set	yes	negative	not set	not set	yes	negative	not set	not set	yes	negative	not set	not set	yes	negative	not set	not set	yes	negative	not set	not set	yes	negative	not set	not set	yes	moderate	75%-25%	nuclear
ENSG00000100142	HPA000827	yes	moderate	75%-25%	nuclear	yes	negative	not set	not set	yes	strong	75%-25%	nuclear	yes	negative	not set	not set	yes	moderate	75%-25%	nuclear	yes	moderate	<25%	nuclear	yes	strong	>75%	nuclear	yes	strong	75%-25%	nuclear
ENSG00000160211	HPA000834	yes	weak	>75%	cytoplasmic	yes	negative	not set	not set	yes	negative	not set	not set	yes	negative	not set	not set	yes	negative	not set	not set	yes	negative	not set	not set	yes	strong	>75%	cytoplasmic	yes	negative	not set	not set
ENSG00000189060	HPA000843	yes	strong	>75%	nuclear	yes	negative	not set	not set	yes	moderate	75%-25%	nuclear	yes	strong	>75%	nuclear	yes	strong	75%-25%	nuclear	yes	moderate	75%-25%	nuclear	yes	strong	>75%	nuclear	yes	strong	75%-25%	nuclear
ENSG00000174373	HPA000851	yes	weak	75%-25%	cytoplasmic	yes	moderate	>75%	cytoplasmic,membrane	yes	moderate	75%-25%	cytoplasmic	yes	negative	not set	not set	yes	moderate	75%-25%	cytoplasmic	yes	moderate	75%-25%	cytoplasmic	yes	negative	not set	not set	yes	moderate	>75%	cytoplasmic
ENSG00000012963	HPA000861	yes	moderate	>75%	nuclear	yes	weak	75%-25%	cytoplasmic	yes	strong	75%-25%	nuclear	yes	negative	not set	not set	yes	strong	75%-25%	nuclear	yes	strong	75%-25%	nuclear	yes	negative	not set	not set	yes	strong	75%-25%	nuclear
ENSG00000100442	HPA000864	yes	moderate	>75%	cytoplasmic	yes	negative	not set	not set	yes	negative	not set	not set	yes	negative	not set	not set	yes	negative	not set	not set	yes	negative	not set	not set	yes	moderate	>75%	cytoplasmic	yes	negative	not set	not set
ENSG00000213463,ENSG00000258644	HPA000866	yes	weak	75%-25%	cytoplasmic,membrane	yes	strong	>75%	cytoplasmic,membrane	yes	strong	>75%	cytoplasmic,membrane	yes	negative	not set	not set	yes	weak	<25%	cytoplasmic,membrane	yes	strong	>75%	cytoplasmic,membrane	yes	negative	not set	not set	yes	moderate	<25%	cytoplasmic,membrane
ENSG00000100664	HPA000867	yes	weak	>75%	cytoplasmic	yes	moderate	>75%	cytoplasmic	yes	strong	75%-25%	cytoplasmic	yes	negative	not set	not set	yes	negative	not set	not set	yes	moderate	>75%	cytoplasmic	yes	moderate	>75%	cytoplasmic	yes	negative	not set	not set
ENSG00000196136	HPA000893	yes	weak	<25%	cytoplasmic	yes	negative	not set	not set	yes	moderate	<25%	nuclear	yes	weak	<25%	cytoplasmic	yes	negative	not set	not set	yes	moderate	<25%	nuclear	yes	negative	not set	not set	yes	negative	not set	not set
ENSG00000113013	HPA000898	yes	strong	>75%	cytoplasmic	yes	negative	not set	not set	yes	strong	<25%	cytoplasmic	yes	negative	not set	not set	yes	negative	not set	not set	yes	negative	not set	not set	yes	strong	75%-25%	cytoplasmic	yes	strong	75%-25%	cytoplasmic
ENSG00000100591	HPA000903	yes	moderate	75%-25%	cytoplasmic	yes	strong	>75%	cytoplasmic	yes	strong	>75%	cytoplasmic,nuclear	yes	negative	not set	not set	yes	strong	>75%	cytoplasmic,nuclear	yes	strong	>75%	cytoplasmic,nuclear	yes	strong	>75%	cytoplasmic,nuclear	yes	strong	>75%	cytoplasmic,nuclear
ENSG00000100567	HPA000905	yes	negative	not set	not set	yes	moderate	75%-25%	cytoplasmic	yes	moderate	<25%	cytoplasmic	yes	negative	not set	not set	yes	negative	not set	not set	yes	negative	not set	not set	yes	negative	not set	not set	yes	negative	not set	not set
ENSG00000101940	HPA000913	yes	strong	75%-25%	nuclear	yes	negative	not set	not set	yes	strong	75%-25%	nuclear	yes	negative	not set	not set	yes	moderate	75%-25%	nuclear	yes	strong	<25%	nuclear	yes	moderate	>75%	nuclear	yes	strong	>75%	nuclear
ENSG00000101882	HPA000916	yes	moderate	75%-25%	nuclear	yes	negative	not set	not set	yes	moderate	>75%	nuclear	yes	negative	not set	not set	yes	strong	>75%	nuclear	yes	negative	not set	not set	yes	negative	not set	not set	yes	strong	>75%	nuclear
ENSG00000126814	HPA000943	yes	negative	not set	not set	yes	negative	not set	not set	yes	negative	not set	not set	yes	negative	not set	not set	yes	strong	>75%	nuclear	yes	negative	not set	not set	yes	strong	>75%	nuclear	yes	strong	>75%	nuclear
ENSG00000129460	HPA000944	yes	weak	<25%	cytoplasmic,membrane	yes	negative	not set	not set	yes	negative	not set	not set	yes	negative	not set	not set	yes	negative	not set	not set	yes	negative	not set	not set	yes	moderate	75%-25%	cytoplasmic,membrane	yes	negative	not set	not set
ENSG00000066455	HPA000992	yes	strong	>75%	cytoplasmic	yes	negative	not set	not set	yes	strong	75%-25%	cytoplasmic	yes	negative	not set	not set	yes	negative	not set	not set	yes	negative	not set	not set	yes	moderate	>75%	cytoplasmic	yes	negative	not set	not set
ENSG00000072415	HPA000993	yes	negative	not set	not set	yes	negative	not set	not set	yes	negative	not set	not set	yes	negative	not set	not set	yes	negative	not set	not set	yes	negative	not set	not set	yes	moderate	75%-25%	nuclear	yes	moderate	75%-25%	nuclear
ENSG00000089820	HPA001012	yes	negative	not set	not set	yes	negative	not set	not set	yes	negative	not set	not set	yes	negative	not set	not set	yes	negative	not set	not set	yes	negative	not set	not set	yes	weak	75%-25%	cytoplasmic	yes	negative	not set	not set
ENSG00000156531	HPA001023	yes	strong	75%-25%	nuclear	yes	negative	not set	not set	yes	negative	not set	not set	yes	negative	not set	not set	yes	strong	75%-25%	nuclear	yes	negative	not set	not set	yes	moderate	>75%	nuclear	yes	strong	>75%	membrane,nuclear
ENSG00000150593	HPA001032	yes	strong	<25%	nuclear	yes	negative	not set	not set	yes	moderate	<25%	nuclear	yes	strong	<25%	nuclear	yes	moderate	<25%	nuclear	yes	moderate	<25%	cytoplasmic	yes	negative	not set	not set	yes	strong	>75%	cytoplasmic
ENSG00000022267	HPA001040	yes	negative	not set	not set	yes	strong	75%-25%	cytoplasmic,nuclear	yes	negative	not set	not set	yes	negative	not set	not set	yes	strong	<25%	cytoplasmic,nuclear	yes	negative	not set	not set	yes	negative	not set	not set	yes	strong	75%-25%	cytoplasmic,nuclear
ENSG00000119042	HPA001042	yes	negative	not set	not set	yes	negative	not set	not set	yes	moderate	75%-25%	cytoplasmic,nuclear	yes	negative	not set	not set	yes	weak	<25%	cytoplasmic,nuclear	yes	negative	not set	not set	yes	negative	not set	not set	yes	weak	75%-25%	cytoplasmic,nuclear
ENSG00000102010	HPA001048	yes	moderate	<25%	cytoplasmic	yes	negative	not set	not set	yes	negative	not set	not set	yes	negative	not set	not set	yes	negative	not set	not set	yes	negative	not set	not set	yes	moderate	75%-25%	cytoplasmic	yes	negative	not set	not set
ENSG00000221994	HPA001053	yes	moderate	>75%		yes	negative	not set	not set	yes	negative	not set	not set	yes	strong	>75%	nuclear	yes	negative	not set	not set	yes	negative	not set	not set	yes	moderate	>75%	nuclear	yes	strong	>75%	nuclear
ENSG00000100425	HPA001063	yes	weak	<25%	nuclear	yes	negative	not set	not set	yes	negative	not set	not set	yes	negative	not set	not set	yes	negative	not set	not set	yes	negative	not set	not set	yes	negative	not set	not set	yes	moderate	75%-25%	nuclear
ENSG00000099899	HPA001077	yes	moderate	>75%	cytoplasmic,nuclear	yes	moderate	>75%	nuclear	yes	strong	>75%	nuclear	yes	moderate	>75%	nuclear	yes	strong	>75%	nuclear	yes	moderate	>75%	nuclear	yes	strong	>75%	nuclear	yes	strong	>75%	nuclear
ENSG00000100412	HPA001097	yes	strong	>75%	cytoplasmic	yes	negative	not set	not set	yes	strong	75%-25%	cytoplasmic	yes	negative	not set	not set	yes	negative	not set	not set	yes	negative	not set	not set	yes	strong	>75%	cytoplasmic	yes	strong	75%-25%	cytoplasmic
ENSG00000100220	HPA001103	yes	moderate	<25%	nuclear	yes	negative	not set	not set	yes	weak	75%-25%	nuclear	yes	negative	not set	not set	yes	negative	not set	not set	yes	weak	<25%	nuclear	yes	negative	not set	not set	yes	strong	75%-25%	nuclear
ENSG00000155961	HPA001114	yes	weak	75%-25%	cytoplasmic	yes	negative	not set	not set	yes	negative	not set	not set	yes	negative	not set	not set	yes	negative	not set	not set	yes	negative	not set	not set	yes	weak	75%-25%	cytoplasmic	yes	moderate	<25%	cytoplasmic
ENSG00000129480	HPA001117	yes	moderate	>75%	cytoplasmic	yes	moderate	75%-25%	cytoplasmic	yes	negative	not set	not set	yes	negative	not set	not set	yes	negative	not set	not set	yes	negative	not set	not set	yes	negative	not set	not set	yes	negative	not set	not set
ENSG00000100811,ENSG00000230797	HPA001119	yes	moderate	<25%	nuclear	yes	negative	not set	not set	yes	moderate	>75%	nuclear	yes	strong	75%-25%	nuclear	yes	weak	<25%	nuclear	yes	weak	<25%	nuclear	yes	strong	>75%	nuclear	yes	negative	not set	not set
ENSG00000198554	HPA001122	yes	negative	not set	not set	yes	negative	not set	not set	yes	moderate	>75%	nuclear	yes	negative	not set	not set	yes	strong	>75%	nuclear	yes	weak	>75%	nuclear	yes	negative	not set	not set	yes	strong	>75%	nuclear
ENSG00000100028	HPA001170	yes	moderate	>75%	nuclear	yes	negative	not set	not set	yes	moderate	>75%	nuclear	yes	negative	not set	not set	yes	moderate	>75%	nuclear	yes	moderate	>75%	nuclear	yes	moderate	>75%	nuclear	yes	moderate	>75%	nuclear
ENSG00000184381	HPA001171	yes	negative	not set	not set	yes	weak	75%-25%	cytoplasmic	yes	strong	<25%	cytoplasmic	yes	negative	not set	not set	yes	negative	not set	not set	yes	strong	>75%	cytoplasmic	yes	negative	not set	not set	yes	negative	not set	not set
ENSG00000165195	HPA001174	yes	moderate	>75%	cytoplasmic	yes	weak	75%-25%	cytoplasmic,membrane	yes	negative	not set	not set	yes	moderate	<25%	cytoplasmic	yes	negative	not set	not set	yes	negative	not set	not set	yes	negative	not set	not set	yes	moderate	75%-25%	cytoplasmic,membrane
ENSG00000183246,ENSG00000274600,ENSG00000275793	HPA001183	yes	weak	>75%	cytoplasmic,nuclear	yes	strong	>75%	cytoplasmic	yes	strong	>75%	cytoplasmic	yes	negative	not set	not set	yes	weak	>75%	cytoplasmic	yes	strong	>75%	cytoplasmic	yes	negative	not set	not set	yes	weak	>75%	cytoplasmic
ENSG00000214107	HPA001193	yes	weak	<25%	cytoplasmic	yes	negative	not set	not set	yes	negative	not set	not set	yes	negative	not set	not set	yes	negative	not set	not set	yes	negative	not set	not set	yes	negative	not set	not set	yes	strong	>75%	nuclear
ENSG00000166025	HPA001196	yes	weak	>75%	cytoplasmic	yes	weak	>75%	cytoplasmic	yes	weak	>75%	cytoplasmic	yes	negative	not set	not set	yes	weak	>75%	cytoplasmic	yes	weak	>75%	cytoplasmic	yes	negative	not set	not set	yes	weak	>75%	cytoplasmic
ENSG00000170881	HPA001202	yes	moderate	>75%	cytoplasmic	yes	moderate	>75%	cytoplasmic,membrane	yes	moderate	75%-25%	cytoplasmic	yes	negative	not set	not set	yes	negative	not set	not set	yes	moderate	75%-25%	cytoplasmic	yes	moderate	>75%	cytoplasmic	yes	negative	not set	not set
ENSG00000100242	HPA001209	yes	moderate	>75%	nuclear	yes	negative	not set	not set	yes	negative	not set	not set	yes	negative	not set	not set	yes	negative	not set	not set	yes	negative	not set	not set	yes	moderate	>75%	nuclear	yes	negative	not set	not set
ENSG00000185721	HPA001218	yes	negative	not set	not set	yes	negative	not set	not set	yes	moderate	>75%	cytoplasmic	yes	negative	not set	not set	yes	negative	not set	not set	yes	negative	not set	not set	yes	moderate	<25%	cytoplasmic	yes	negative	not set	not set
ENSG00000100056	HPA001221	yes	weak	<25%	nuclear	yes	negative	not set	not set	yes	moderate	>75%	nuclear	yes	moderate	<25%	nuclear	yes	moderate	>75%	nuclear	yes	weak	75%-25%	nuclear	yes	moderate	>75%	nuclear	yes	strong	>75%	nuclear
ENSG00000100056	HPA001222	yes	negative	not set	not set	yes	negative	not set	not set	yes	negative	not set	not set	yes	negative	not set	not set	yes	negative	not set	not set	yes	negative	not set	not set	yes	negative	not set	not set	yes	moderate	75%-25%	nuclear
ENSG00000100206	HPA001232	yes	negative	not set	not set	yes	negative	not set	not set	yes	strong	>75%	nuclear	yes	negative	not set	not set	yes	negative	not set	not set	yes	negative	not set	not set	yes	negative	not set	not set	yes	negative	not set	not set
ENSG00000128309	HPA001240	yes	moderate	>75%	cytoplasmic,membrane	yes	moderate	>75%	cytoplasmic,membrane	yes	negative	not set	not set	yes	negative	not set	not set	yes	negative	not set	not set	yes	moderate	>75%	nuclear	yes	weak	75%-25%	cytoplasmic,membrane	yes	negative	not set	not set
ENSG00000243978	HPA001242	yes	moderate	75%-25%	nuclear	yes	negative	not set	not set	yes	negative	not set	not set	yes	negative	not set	not set	yes	negative	not set	not set	yes	negative	not set	not set	yes	strong	>75%	nuclear	yes	negative	not set	not set
ENSG00000179091	HPA001247	yes	strong	>75%	cytoplasmic	yes	negative	not set	not set	yes	strong	<25%	cytoplasmic	yes	negative	not set	not set	yes	negative	not set	not set	yes	negative	not set	not set	yes	strong	>75%	cytoplasmic	yes	strong	75%-25%	cytoplasmic
ENSG00000113387	HPA001311	yes	moderate	>75%	nuclear	yes	negative	not set	not set	yes	moderate	>75%	nuclear	yes	negative	not set	not set	yes	moderate	75%-25%	nuclear	yes	negative	not set	not set	yes	moderate	>75%	nuclear	yes	moderate	75%-25%	nuclear
ENSG00000023318	HPA001318	yes	moderate	>75%	cytoplasmic	yes	negative	not set	not set	yes	moderate	75%-25%	cytoplasmic	yes	negative	not set	not set	yes	negative	not set	not set	yes	moderate	75%-25%	cytoplasmic	yes	strong	>75%	cytoplasmic	yes	negative	not set	not set
ENSG00000174405	HPA001334	yes	moderate	>75%	nuclear	yes	negative	not set	not set	yes	moderate	75%-25%	nuclear	yes	negative	not set	not set	yes	negative	not set	not set	yes	moderate	>75%	nuclear	yes	moderate	>75%	nuclear	yes	negative	not set	not set
ENSG00000169057	HPA001341	yes	moderate	>75%	nuclear	yes	negative	not set	not set	yes	negative	not set	not set	yes	negative	not set	not set	yes	negative	not set	not set	yes	negative	not set	not set	yes	moderate	>75%	nuclear	yes	negative	not set	not set
ENSG00000197535	HPA001356	yes	negative	not set	not set	yes	negative	not set	not set	yes	negative	not set	not set	yes	negative	not set	not set	yes	negative	not set	not set	yes	negative	not set	not set	yes	weak	75%-25%	cytoplasmic	yes	negative	not set	not set
ENSG00000126945,ENSG00000169045	HPA001359	yes	strong	75%-25%	nuclear	yes	negative	not set	not set	yes	strong	75%-25%	nuclear	yes	moderate	<25%	nuclear	yes	strong	75%-25%	nuclear	yes	negative	not set	not set	yes	strong	>75%	nuclear	yes	strong	>75%	nuclear
ENSG00000100941	HPA001378	yes	moderate	>75%	nuclear	yes	moderate	75%-25%	nuclear	yes	strong	>75%	nuclear	yes	moderate	75%-25%	nuclear	yes	strong	75%-25%	nuclear	yes	strong	75%-25%	nuclear	yes	moderate	>75%	nuclear	yes	strong	>75%	nuclear
ENSG00000139174	HPA001379	yes	moderate	75%-25%	nuclear	yes	negative	not set	not set	yes	negative	not set	not set	yes	negative	not set	not set	yes	negative	not set	not set	yes	moderate	>75%	cytoplasmic	yes	moderate	>75%	nuclear	yes	negative	not set	not set
ENSG00000196839	HPA001399	yes	weak	75%-25%	cytoplasmic,nuclear	yes	negative	not set	not set	yes	negative	not set	not set	yes	negative	not set	not set	yes	negative	not set	not set	yes	moderate	75%-25%	nuclear	yes	negative	not set	not set	yes	negative	not set	not set
ENSG00000106348,ENSG00000178035,ENSG00000290315	HPA001400	yes	negative	not set	not set	yes	negative	not set	not set	yes	moderate	<25%	cytoplasmic	yes	negative	not set	not set	yes	negative	not set	not set	yes	negative	not set	not set	yes	negative	not set	not set	yes	strong	75%-25%	cytoplasmic
ENSG00000142168	HPA001401	yes	moderate	75%-25%	cytoplasmic	yes	negative	not set	not set	yes	weak	<25%	nuclear	yes	negative	not set	not set	yes	negative	not set	not set	yes	negative	not set	not set	yes	negative	not set	not set	yes	strong	>75%	cytoplasmic
ENSG00000100325	HPA001439	yes	moderate	>75%	cytoplasmic	yes	moderate	75%-25%	cytoplasmic	yes	moderate	75%-25%	cytoplasmic	yes	moderate	75%-25%	cytoplasmic	yes	moderate	<25%	cytoplasmic,nuclear	yes	moderate	75%-25%	cytoplasmic,nuclear	yes	moderate	>75%	cytoplasmic,nuclear	yes	moderate	<25%	cytoplasmic,nuclear
ENSG00000085063	CAB001448	yes	strong	>75%	membrane	yes	moderate	>75%	cytoplasmic,membrane	yes	negative	not set	not set	yes	negative	not set	not set	yes	negative	not set	not set	yes	negative	not set	not set	yes	moderate	>75%	membrane	yes	negative	not set	not set
ENSG00000087586	CAB001454	yes	weak	<25%	cytoplasmic	yes	negative	not set	not set	yes	moderate	>75%	cytoplasmic,membrane	yes	negative	not set	not set	yes	weak	<25%	cytoplasmic,membrane	yes	negative	not set	not set	yes	negative	not set	not set	yes	moderate	<25%	cytoplasmic,membrane
ENSG00000142192	HPA001462	yes	negative	not set	not set	yes	negative	not set	not set	yes	negative	not set	not set	yes	negative	not set	not set	yes	negative	not set	not set	yes	negative	not set	not set	yes	moderate	>75%	cytoplasmic	yes	negative	not set	not set
ENSG00000079950	HPA001467	yes	moderate	>75%	cytoplasmic,membrane	yes	negative	not set	not set	yes	negative	not set	not set	yes	negative	not set	not set	yes	negative	not set	not set	yes	negative	not set	not set	yes	negative	not set	not set	yes	moderate	75%-25%	cytoplasmic,membrane
ENSG00000124092	HPA001472	yes	weak	>75%	cytoplasmic	yes	weak	<25%	cytoplasmic	yes	weak	>75%	cytoplasmic	yes	negative	not set	not set	yes	strong	75%-25%	cytoplasmic	yes	weak	>75%	cytoplasmic	yes	negative	not set	not set	yes	moderate	>75%	cytoplasmic
ENSG00000135114	HPA001474	yes	negative	not set	not set	yes	moderate	75%-25%	cytoplasmic	yes	moderate	75%-25%	cytoplasmic,membrane	yes	negative	not set	not set	yes	negative	not set	not set	yes	moderate	75%-25%	cytoplasmic,membrane	yes	negative	not set	not set	yes	moderate	>75%	cytoplasmic,membrane
ENSG00000158773	CAB001480	yes	moderate	>75%	nuclear	yes	negative	not set	not set	yes	negative	not set	not set	yes	negative	not set	not set	yes	negative	not set	not set	yes	negative	not set	not set	yes	moderate	>75%	nuclear	yes	moderate	75%-25%	nuclear
ENSG00000125846	HPA001493	yes	moderate	<25%	nuclear	yes	negative	not set	not set	yes	negative	not set	not set	yes	negative	not set	not set	yes	negative	not set	not set	yes	weak	<25%	nuclear	yes	negative	not set	not set	yes	moderate	>75%	nuclear
ENSG00000106927	HPA001497	yes	negative	not set	not set	yes	moderate	<25%	cytoplasmic	yes	negative	not set	not set	yes	negative	not set	not set	yes	negative	not set	not set	yes	weak	75%-25%	cytoplasmic	yes	negative	not set	not set	yes	negative	not set	not set
ENSG00000077935	HPA001500	yes	weak	>75%	cytoplasmic	yes	weak	75%-25%	cytoplasmic	yes	strong	>75%	cytoplasmic	yes	negative	not set	not set	yes	strong	75%-25%	cytoplasmic	yes	moderate	>75%	cytoplasmic	yes	negative	not set	not set	yes	strong	>75%	cytoplasmic
ENSG00000105202	CAB001514	yes	moderate	>75%	nuclear	yes	negative	not set	not set	yes	negative	not set	not set	yes	negative	not set	not set	yes	negative	not set	not set	yes	negative	not set	not set	yes	negative	not set	not set	yes	moderate	75%-25%	nuclear
ENSG00000144381	HPA001523	yes	strong	>75%	cytoplasmic	yes	moderate	>75%	cytoplasmic	yes	moderate	>75%	cytoplasmic	yes	negative	not set	not set	yes	negative	not set	not set	yes	moderate	>75%	cytoplasmic	yes	moderate	>75%	cytoplasmic	yes	strong	>75%	cytoplasmic
ENSG00000110955	HPA001528	yes	moderate	>75%	cytoplasmic	yes	negative	not set	not set	yes	strong	>75%	cytoplasmic	yes	negative	not set	not set	yes	strong	>75%	cytoplasmic	yes	moderate	>75%	cytoplasmic	yes	moderate	>75%	cytoplasmic	yes	strong	>75%	cytoplasmic
ENSG00000169800,ENSG00000226941,ENSG00000234414,ENSG00000242389,ENSG00000242875,ENSG00000244395	HPA001534	yes	negative	not set	not set	yes	negative	not set	not set	yes	strong	>75%	nuclear	yes	negative	not set	not set	yes	strong	>75%	nuclear	yes	strong	>75%	nuclear	yes	negative	not set	not set	yes	strong	>75%	nuclear
ENSG00000115758	HPA001536	yes	moderate	75%-25%	cytoplasmic	yes	negative	not set	not set	yes	moderate	<25%	nuclear	yes	negative	not set	not set	yes	moderate	<25%	nuclear	yes	moderate	<25%	nuclear	yes	negative	not set	not set	yes	moderate	<25%	cytoplasmic
ENSG00000170310	HPA001540	yes	strong	75%-25%	cytoplasmic	yes	moderate	>75%	cytoplasmic	yes	moderate	>75%	cytoplasmic	yes	strong	75%-25%	nuclear	yes	strong	75%-25%	nuclear	yes	strong	75%-25%	cytoplasmic	yes	strong	75%-25%	nuclear	yes	strong	75%-25%	nuclear
ENSG00000104267	HPA001550	yes	negative	not set	not set	yes	strong	>75%	cytoplasmic	yes	negative	not set	not set	yes	negative	not set	not set	yes	negative	not set	not set	yes	negative	not set	not set	yes	negative	not set	not set	yes	negative	not set	not set
ENSG00000110944	HPA001554	yes	weak	75%-25%	cytoplasmic	yes	weak	75%-25%	cytoplasmic	yes	weak	75%-25%	cytoplasmic	yes	negative	not set	not set	yes	negative	not set	not set	yes	moderate	>75%	nuclear	yes	negative	not set	not set	yes	negative	not set	not set
ENSG00000167981	HPA001556	yes	negative	not set	not set	yes	negative	not set	not set	yes	moderate	75%-25%	cytoplasmic	yes	negative	not set	not set	yes	moderate	>75%	nuclear	yes	moderate	>75%	nuclear	yes	negative	not set	not set	yes	moderate	>75%	nuclear
ENSG00000131051	HPA001591	yes	moderate	75%-25%	nuclear	yes	negative	not set	not set	yes	moderate	>75%	nuclear	yes	negative	not set	not set	yes	moderate	>75%	nuclear	yes	moderate	>75%	nuclear	yes	moderate	>75%	nuclear	yes	moderate	>75%	nuclear
ENSG00000156313	HPA001593	yes	moderate	>75%	cytoplasmic	yes	strong	>75%	cytoplasmic	yes	strong	75%-25%	cytoplasmic	yes	negative	not set	not set	yes	weak	75%-25%	cytoplasmic	yes	strong	>75%	cytoplasmic	yes	weak	>75%	cytoplasmic	yes	moderate	75%-25%	cytoplasmic
ENSG00000059728	HPA001599	yes	moderate	<25%	cytoplasmic,nuclear	yes	negative	not set	not set	yes	strong	>75%	nuclear	yes	negative	not set	not set	yes	strong	75%-25%	nuclear	yes	strong	>75%	nuclear	yes	strong	75%-25%	nuclear	yes	strong	>75%	nuclear
ENSG00000111145	HPA001600	yes	weak	<25%	cytoplasmic	yes	negative	not set	not set	yes	negative	not set	not set	yes	negative	not set	not set	yes	negative	not set	not set	yes	negative	not set	not set	yes	moderate	75%-25%	cytoplasmic	yes	negative	not set	not set
ENSG00000140067	HPA001603	yes	negative	not set	not set	yes	weak	>75%	cytoplasmic	yes	strong	75%-25%	cytoplasmic,membrane	yes	negative	not set	not set	yes	negative	not set	not set	yes	strong	>75%	cytoplasmic,membrane	yes	negative	not set	not set	yes	negative	not set	not set
ENSG00000135486	HPA001609	yes	strong	75%-25%	nuclear	yes	negative	not set	not set	yes	negative	75%-25%	nuclear	yes	moderate	75%-25%	nuclear	yes	strong	75%-25%	nuclear	yes	strong	75%-25%	nuclear	yes	strong	>75%	nuclear	yes	strong	>75%	nuclear
ENSG00000184708	HPA001619	yes	weak	75%-25%	cytoplasmic	yes	negative	not set	not set	yes	negative	not set	not set	yes	negative	not set	not set	yes	negative	not set	not set	yes	negative	not set	not set	yes	negative	not set	not set	yes	strong	>75%	cytoplasmic
ENSG00000086589	HPA001634	yes	moderate	75%-25%	nuclear	yes	negative	not set	not set	yes	moderate	75%-25%	nuclear	yes	moderate	>75%	nuclear	yes	moderate	75%-25%	nuclear	yes	moderate	75%-25%	nuclear	yes	moderate	>75%	nuclear	yes	strong	<25%	nuclear
ENSG00000163848	HPA001656	yes	moderate	>75%	nuclear	yes	negative	not set	not set	yes	negative	not set	not set	yes	moderate	<25%	nuclear	yes	negative	not set	not set	yes	negative	not set	not set	yes	moderate	<25%	nuclear	yes	moderate	75%-25%	nuclear
ENSG00000263002	HPA001664	yes	moderate	>75%	nuclear	yes	negative	not set	not set	yes	negative	not set	not set	yes	negative	not set	not set	yes	negative	not set	not set	yes	negative	not set	not set	yes	moderate	>75%	nuclear	yes	moderate	>75%	nuclear
ENSG00000122566,ENSG00000135486,ENSG00000170144,ENSG00000224578	HPA001666	yes	moderate	75%-25%	nuclear	yes	negative	not set	not set	yes	strong	75%-25%	nuclear	yes	moderate	<25%	nuclear	yes	strong	75%-25%	nuclear	yes	strong	>75%	nuclear	yes	moderate	<25%	nuclear	yes	strong	>75%	nuclear
ENSG00000106415	HPA001674	yes	weak	75%-25%	nuclear	yes	negative	not set	not set	yes	moderate	75%-25%	cytoplasmic	yes	negative	not set	not set	yes	moderate	<25%	cytoplasmic	yes	moderate	<25%	cytoplasmic,nuclear	yes	negative	not set	not set	yes	moderate	<25%	nuclear
ENSG00000173905	HPA001677	yes	strong	75%-25%	cytoplasmic	yes	negative	not set	not set	yes	negative	not set	not set	yes	negative	not set	not set	yes	negative	not set	not set	yes	negative	not set	not set	yes	negative	not set	not set	yes	strong	<25%	cytoplasmic
ENSG00000144843	CAB001701	yes	moderate	>75%	cytoplasmic	yes	negative	not set	not set	yes	negative	not set	not set	yes	negative	not set	not set	yes	negative	not set	not set	yes	negative	not set	not set	yes	weak	75%-25%	cytoplasmic	yes	moderate	<25%	cytoplasmic
ENSG00000005889,ENSG00000067646	HPA001748	yes	weak	75%-25%	cytoplasmic,nuclear	yes	negative	not set	not set	yes	moderate	<25%	nuclear	yes	negative	not set	not set	yes	moderate	<25%	nuclear	yes	negative	not set	not set	yes	negative	not set	not set	yes	moderate	<25%	nuclear
ENSG00000099326	HPA001757	yes	moderate	75%-25%	cytoplasmic	yes	negative	not set	not set	yes	negative	not set	not set	yes	negative	not set	not set	yes	negative	not set	not set	yes	negative	not set	not set	yes	negative	not set	not set	yes	negative	not set	not set
ENSG00000197879	HPA001768	yes	strong	>75%	cytoplasmic	yes	negative	not set	not set	yes	negative	not set	not set	yes	moderate	>75%	cytoplasmic	yes	negative	not set	not set	yes	negative	not set	not set	yes	weak	>75%	cytoplasmic	yes	negative	not set	not set
ENSG00000090060	HPA001788	yes	moderate	75%-25%	nuclear	yes	negative	not set	not set	yes	moderate	75%-25%	nuclear	yes	moderate	>75%	nuclear	yes	moderate	>75%	nuclear	yes	moderate	75%-25%	nuclear	yes	moderate	>75%	nuclear	yes	moderate	>75%	nuclear
ENSG00000090612	HPA001794	yes	moderate	75%-25%	cytoplasmic,nuclear	yes	negative	not set	not set	yes	strong	<25%	cytoplasmic	yes	negative	not set	not set	yes	strong	<25%	cytoplasmic	yes	negative	not set	not set	yes	negative	not set	not set	yes	weak	75%-25%	cytoplasmic
ENSG00000151748	HPA001808	yes	weak	>75%	cytoplasmic	yes	negative	not set	not set	yes	weak	<25%	cytoplasmic	yes	negative	not set	not set	yes	moderate	>75%	cytoplasmic	yes	negative	not set	not set	yes	negative	not set	not set	yes	moderate	>75%	cytoplasmic
ENSG00000239713	HPA001812	yes	negative	not set	not set	yes	negative	not set	not set	yes	negative	not set	not set	yes	negative	not set	not set	yes	negative	not set	not set	yes	negative	not set	not set	yes	moderate	75%-25%	cytoplasmic	yes	negative	not set	not set
ENSG00000291237	HPA001814	yes	moderate	75%-25%	cytoplasmic	yes	negative	not set	not set	yes	negative	not set	not set	yes	negative	not set	not set	yes	negative	not set	not set	yes	moderate	<25%	cytoplasmic	yes	moderate	75%-25%	cytoplasmic	yes	strong	>75%	cytoplasmic
ENSG00000095794	HPA001818	yes	negative	not set	not set	yes	negative	not set	not set	yes	moderate	75%-25%	nuclear	yes	negative	not set	not set	yes	negative	not set	not set	yes	strong	>75%	nuclear	yes	negative	not set	not set	yes	negative	not set	not set
ENSG00000112658	HPA001819	yes	moderate	75%-25%	nuclear	yes	negative	not set	not set	yes	negative	not set	not set	yes	negative	not set	not set	yes	negative	not set	not set	yes	negative	not set	not set	yes	moderate	75%-25%	nuclear	yes	negative	not set	not set
ENSG00000184047	HPA001825	yes	moderate	>75%	cytoplasmic	yes	moderate	>75%	cytoplasmic	yes	strong	>75%	cytoplasmic	yes	negative	not set	not set	yes	strong	>75%	cytoplasmic	yes	strong	>75%	cytoplasmic	yes	weak	>75%	cytoplasmic	yes	strong	>75%	cytoplasmic
ENSG00000112983	HPA001841	yes	moderate	75%-25%	nuclear	yes	negative	not set	not set	yes	strong	>75%	nuclear	yes	moderate	<25%	nuclear	yes	strong	>75%	nuclear	yes	strong	>75%	nuclear	yes	moderate	>75%	nuclear	yes	strong	>75%	nuclear
ENSG00000102786	HPA001846	yes	negative	not set	not set	yes	negative	not set	not set	yes	moderate	75%-25%	nuclear	yes	negative	not set	not set	yes	negative	not set	not set	yes	strong	>75%	nuclear	yes	negative	not set	not set	yes	moderate	<25%	nuclear
ENSG00000157470	HPA001847	yes	negative	not set	not set	yes	negative	not set	not set	yes	strong	<25%	nuclear	yes	negative	not set	not set	yes	strong	<25%	nuclear	yes	strong	75%-25%	nuclear	yes	negative	not set	not set	yes	strong	75%-25%	nuclear
ENSG00000185591	HPA001853	yes	weak	75%-25%	cytoplasmic	yes	negative	not set	not set	yes	negative	not set	not set	yes	negative	not set	not set	yes	negative	not set	not set	yes	negative	not set	not set	yes	moderate	75%-25%	nuclear	yes	negative	not set	not set
ENSG00000138378	HPA001860	yes	weak	>75%	cytoplasmic	yes	weak	>75%	cytoplasmic,nuclear	yes	weak	>75%	cytoplasmic	yes	negative	not set	not set	yes	weak	>75%	cytoplasmic	yes	strong	>75%	cytoplasmic,nuclear	yes	negative	not set	not set	yes	weak	>75%	cytoplasmic
ENSG00000213928	HPA001862	yes	weak	75%-25%	nuclear	yes	negative	not set	not set	yes	negative	not set	not set	yes	negative	not set	not set	yes	negative	not set	not set	yes	negative	not set	not set	yes	moderate	>75%	nuclear	yes	negative	not set	not set
ENSG00000141968	HPA001864	yes	negative	not set	not set	yes	moderate	>75%	cytoplasmic,membrane	yes	negative	not set	not set	yes	negative	not set	not set	yes	negative	not set	not set	yes	negative	not set	not set	yes	negative	not set	not set	yes	negative	not set	not set
ENSG00000104611	HPA001871	yes	strong	75%-25%	cytoplasmic,nuclear	yes	negative	not set	not set	yes	moderate	>75%	cytoplasmic	yes	negative	not set	not set	yes	negative	not set	not set	yes	moderate	>75%	cytoplasmic	yes	negative	not set	not set	yes	strong	>75%	cytoplasmic
ENSG00000136811	HPA001874	yes	negative	not set	not set	yes	strong	>75%	cytoplasmic	yes	weak	>75%	cytoplasmic	yes	negative	not set	not set	yes	weak	>75%	cytoplasmic,nuclear	yes	moderate	>75%	cytoplasmic,nuclear	yes	negative	not set	not set	yes	weak	>75%	cytoplasmic,nuclear
ENSG00000102387	HPA001879	yes	negative	not set	not set	yes	negative	not set	not set	yes	moderate	<25%	cytoplasmic	yes	negative	not set	not set	yes	negative	not set	not set	yes	negative	not set	not set	yes	negative	not set	not set	yes	negative	not set	not set
ENSG00000102103	HPA001880	yes	strong	>75%	nuclear	yes	negative	not set	not set	yes	negative	not set	not set	yes	strong	75%-25%	nuclear	yes	strong	75%-25%	nuclear	yes	moderate	<25%	nuclear	yes	strong	75%-25%	nuclear	yes	strong	>75%	nuclear
ENSG00000170458	HPA001887	yes	weak	75%-25%	cytoplasmic	yes	negative	not set	not set	yes	negative	not set	not set	yes	negative	not set	not set	yes	negative	not set	not set	yes	negative	not set	not set	yes	negative	not set	not set	yes	moderate	75%-25%	cytoplasmic,membrane
ENSG00000126778	HPA001893	yes	negative	not set	not set	yes	negative	not set	not set	yes	moderate	75%-25%	cytoplasmic,membrane	yes	negative	not set	not set	yes	negative	not set	not set	yes	moderate	>75%	cytoplasmic,membrane	yes	negative	not set	not set	yes	negative	not set	not set
ENSG00000068394	HPA001894	yes	moderate	>75%	nuclear	yes	negative	not set	not set	yes	strong	<25%	nuclear	yes	negative	not set	not set	yes	strong	75%-25%	nuclear	yes	negative	not set	not set	yes	moderate	>75%	nuclear	yes	strong	75%-25%	nuclear
ENSG00000129351	HPA001897	yes	strong	>75%	nuclear	yes	negative	not set	not set	yes	strong	>75%	nuclear	yes	strong	>75%	nuclear	yes	strong	>75%	nuclear	yes	strong	>75%	nuclear	yes	strong	>75%	nuclear	yes	strong	>75%	nuclear
ENSG00000085224	HPA001906	yes	moderate	>75%	nuclear	yes	negative	not set	not set	yes	negative	not set	not set	yes	negative	not set	not set	yes	negative	not set	not set	yes	negative	not set	not set	yes	moderate	>75%	nuclear	yes	negative	not set	not set
ENSG00000132604	HPA001907	yes	weak	<25%	nuclear	yes	negative	not set	not set	yes	moderate	>75%	nuclear	yes	negative	not set	not set	yes	strong	75%-25%	nuclear	yes	negative	not set	not set	yes	negative	not set	not set	yes	strong	75%-25%	nuclear
ENSG00000135862	HPA001909	yes	negative	not set	not set	yes	negative	not set	not set	yes	moderate	75%-25%	cytoplasmic,membrane	yes	moderate	>75%	cytoplasmic,membrane	yes	negative	not set	not set	yes	negative	not set	not set	yes	negative	not set	not set	yes	negative	not set	not set
ENSG00000179115	HPA001911	yes	moderate	75%-25%	cytoplasmic	yes	strong	>75%	cytoplasmic	yes	strong	>75%	cytoplasmic	yes	negative	not set	not set	yes	strong	>75%	cytoplasmic	yes	strong	>75%	cytoplasmic	yes	weak	>75%	cytoplasmic	yes	strong	>75%	cytoplasmic
ENSG00000124126	HPA001927	yes	weak	>75%	cytoplasmic	yes	moderate	>75%	cytoplasmic,membrane	yes	moderate	75%-25%	cytoplasmic	yes	negative	not set	not set	yes	moderate	<25%	nuclear	yes	moderate	75%-25%	cytoplasmic	yes	negative	not set	not set	yes	moderate	<25%	cytoplasmic
ENSG00000196498	HPA001928	yes	moderate	>75%	nuclear	yes	negative	not set	not set	yes	negative	not set	not set	yes	negative	not set	not set	yes	negative	not set	not set	yes	negative	not set	not set	yes	moderate	>75%	nuclear	yes	negative	not set	not set
ENSG00000171132	CAB001948	yes	negative	not set	not set	yes	negative	not set	not set	yes	negative	not set	not set	yes	negative	not set	not set	yes	negative	not set	not set	yes	negative	not set	not set	yes	moderate	<25%	cytoplasmic,membrane	yes	negative	not set	not set
ENSG00000089902	CAB001956	yes	strong	75%-25%	nuclear	yes	negative	not set	not set	yes	strong	75%-25%	nuclear	yes	strong	75%-25%	nuclear	yes	strong	75%-25%	nuclear	yes	negative	not set	not set	yes	negative	not set	not set	yes	strong	>75%	nuclear
ENSG00000160633	CAB001969	yes	strong	>75%	nuclear	yes	strong	>75%	nuclear	yes	strong	>75%	nuclear	yes	strong	>75%	nuclear	yes	strong	>75%	nuclear	yes	strong	>75%	nuclear	yes	strong	>75%	nuclear	yes	strong	>75%	nuclear
ENSG00000069424	CAB001975	yes	negative	not set	not set	yes	negative	not set	not set	yes	moderate	75%-25%	cytoplasmic	yes	negative	not set	not set	yes	negative	not set	not set	yes	negative	not set	not set	yes	negative	not set	not set	yes	negative	not set	not set
ENSG00000137076	CAB002006	yes	strong	>75%	cytoplasmic	yes	negative	not set	not set	yes	negative	not set	not set	yes	negative	not set	not set	yes	negative	not set	not set	yes	negative	not set	not set	yes	moderate	>75%	cytoplasmic	yes	strong	<25%	cytoplasmic
ENSG00000151090	CAB002009	yes	moderate	75%-25%	nuclear	yes	moderate	>75%	nuclear	yes	weak	>75%	nuclear	yes	negative	not set	not set	yes	moderate	75%-25%	nuclear	yes	moderate	75%-25%	nuclear	yes	weak	>75%	nuclear	yes	moderate	75%-25%	nuclear
ENSG00000067829	HPA002017	yes	strong	>75%	cytoplasmic	yes	moderate	<25%	cytoplasmic	yes	negative	not set	not set	yes	negative	not set	not set	yes	negative	not set	not set	yes	negative	not set	not set	yes	strong	<25%	cytoplasmic	yes	strong	75%-25%	cytoplasmic
ENSG00000147475	HPA002025	yes	strong	>75%	cytoplasmic	yes	strong	>75%	cytoplasmic,membrane	yes	strong	75%-25%	cytoplasmic,membrane	yes	negative	not set	not set	yes	moderate	>75%	cytoplasmic	yes	strong	>75%	cytoplasmic,membrane	yes	moderate	>75%	cytoplasmic,membrane	yes	moderate	>75%	cytoplasmic
ENSG00000102119	CAB002029	yes	negative	not set	not set	yes	negative	not set	not set	yes	negative	not set	not set	yes	negative	not set	not set	yes	negative	not set	not set	yes	negative	not set	not set	yes	moderate	>75%	membrane,nuclear	yes	negative	not set	not set
ENSG00000129071	HPA002031	yes	moderate	>75%	nuclear	yes	negative	not set	not set	yes	moderate	>75%	nuclear	yes	negative	not set	not set	yes	strong	75%-25%	nuclear	yes	moderate	75%-25%	nuclear	yes	moderate	75%-25%	nuclear	yes	strong	75%-25%	nuclear
ENSG00000184708	HPA002078	yes	moderate	>75%	cytoplasmic	yes	negative	not set	not set	yes	negative	not set	not set	yes	negative	not set	not set	yes	negative	not set	not set	yes	moderate	75%-25%	nuclear	yes	moderate	>75%	cytoplasmic	yes	strong	>75%	cytoplasmic,nuclear
ENSG00000110799	HPA002082	yes	negative	not set	not set	yes	negative	not set	not set	yes	negative	not set	not set	yes	negative	not set	not set	yes	negative	not set	not set	yes	negative	not set	not set	yes	negative	not set	not set	yes	moderate	75%-25%	nuclear
ENSG00000035403	HPA002131	yes	weak	<25%	cytoplasmic	yes	negative	not set	not set	yes	moderate	>75%	nuclear	yes	negative	not set	not set	yes	moderate	>75%	nuclear	yes	moderate	>75%	nuclear	yes	strong	>75%	cytoplasmic	yes	negative	not set	not set
ENSG00000124207	CAB002140	yes	negative	not set	not set	yes	moderate	>75%	cytoplasmic	yes	strong	>75%	nuclear	yes	negative	not set	not set	yes	strong	>75%	nuclear	yes	strong	>75%	nuclear	yes	strong	>75%	nuclear	yes	strong	>75%	nuclear
ENSG00000112118	CAB002162	yes	negative	not set	not set	yes	negative	not set	not set	yes	negative	not set	not set	yes	negative	not set	not set	yes	moderate	>75%	nuclear	yes	negative	not set	not set	yes	negative	not set	not set	yes	negative	not set	not set
ENSG00000196365	HPA002192	yes	moderate	>75%	cytoplasmic,nuclear	yes	moderate	>75%	cytoplasmic	yes	moderate	75%-25%	nuclear	yes	negative	not set	not set	yes	strong	>75%	cytoplasmic	yes	moderate	>75%	nuclear	yes	moderate	>75%	nuclear	yes	strong	>75%	cytoplasmic
ENSG00000204209	CAB002224	yes	weak	<25%	nuclear	yes	negative	not set	not set	yes	strong	<25%	nuclear	yes	negative	not set	not set	yes	negative	not set	not set	yes	strong	75%-25%	nuclear	yes	moderate	<25%	nuclear	yes	moderate	<25%	nuclear
ENSG00000150753	HPA002238	yes	negative	not set	not set	yes	strong	>75%	membrane	yes	strong	>75%	membrane,nuclear	yes	negative	not set	not set	yes	strong	>75%	membrane	yes	strong	>75%	membrane	yes	moderate	>75%	membrane	yes	strong	>75%	membrane
ENSG00000168496	CAB002262	yes	weak	<25%	nuclear	yes	negative	not set	not set	yes	moderate	>75%	nuclear	yes	negative	not set	not set	yes	moderate	75%-25%	nuclear	yes	moderate	>75%	nuclear	yes	negative	not set	not set	yes	moderate	75%-25%	nuclear
ENSG00000257335	HPA002270	yes	negative	not set	not set	yes	moderate	<25%	cytoplasmic	yes	negative	not set	not set	yes	negative	not set	not set	yes	negative	not set	not set	yes	moderate	<25%	nuclear	yes	negative	not set	not set	yes	negative	not set	not set
ENSG00000113140	CAB002306	yes	strong	>75%	cytoplasmic	yes	negative	not set	not set	yes	strong	>75%	nuclear	yes	strong	>75%	nuclear	yes	strong	>75%	nuclear	yes	strong	>75%	nuclear	yes	strong	>75%	cytoplasmic,nuclear	yes	strong	>75%	nuclear
ENSG00000023445	HPA002317	yes	weak	>75%	cytoplasmic	yes	negative	not set	not set	yes	negative	not set	not set	yes	negative	not set	not set	yes	strong	>75%	nuclear	yes	negative	not set	not set	yes	negative	not set	not set	yes	strong	>75%	nuclear
ENSG00000089723	HPA002329	yes	weak	75%-25%	cytoplasmic,nuclear	yes	strong	>75%	cytoplasmic,membrane	yes	strong	>75%	nuclear	yes	weak	<25%	cytoplasmic,membrane,nuclear	yes	moderate	>75%	nuclear	yes	strong	>75%	nuclear	yes	weak	<25%	nuclear	yes	weak	>75%	nuclear
ENSG00000163681	HPA002357	yes	weak	<25%	cytoplasmic	yes	negative	not set	not set	yes	negative	not set	not set	yes	moderate	75%-25%	cytoplasmic	yes	negative	not set	not set	yes	negative	not set	not set	yes	strong	>75%	cytoplasmic	yes	negative	not set	not set
ENSG00000163681	HPA002358	yes	negative	not set	not set	yes	negative	not set	not set	yes	negative	not set	not set	yes	strong	>75%	cytoplasmic	yes	negative	not set	not set	yes	negative	not set	not set	yes	strong	>75%	cytoplasmic	yes	negative	not set	not set
ENSG00000172270	CAB002427	yes	negative	not set	not set	yes	negative	not set	not set	yes	negative	not set	not set	yes	negative	not set	not set	yes	negative	not set	not set	yes	negative	not set	not set	yes	strong	>75%	cytoplasmic,membrane	yes	negative	not set	not set
ENSG00000072571	CAB002433	yes	weak	75%-25%	cytoplasmic	yes	negative	not set	not set	yes	strong	>75%	cytoplasmic,membrane	yes	negative	not set	not set	yes	negative	not set	not set	yes	weak	<25%	cytoplasmic,membrane	yes	negative	not set	not set	yes	negative	not set	not set
ENSG00000131747	CAB002448	yes	negative	not set	not set	yes	negative	not set	not set	yes	strong	>75%	nuclear	yes	negative	not set	not set	yes	strong	<25%	nuclear	yes	strong	>75%	nuclear	yes	negative	not set	not set	yes	moderate	<25%	nuclear
ENSG00000177302	CAB002449	yes	negative	not set	not set	yes	negative	not set	not set	yes	weak	75%-25%	nuclear	yes	negative	not set	not set	yes	negative	not set	not set	yes	negative	not set	not set	yes	moderate	75%-25%	nuclear	yes	negative	not set	not set
ENSG00000035403	CAB002453	yes	negative	not set	not set	yes	strong	>75%	cytoplasmic	yes	strong	75%-25%	cytoplasmic,nuclear	yes	negative	not set	not set	yes	moderate	>75%	cytoplasmic,nuclear	yes	strong	>75%	nuclear	yes	moderate	>75%	cytoplasmic,nuclear	yes	moderate	75%-25%	cytoplasmic,nuclear
ENSG00000100603	HPA002457	yes	strong	>75%	nuclear	yes	negative	not set	not set	yes	strong	>75%	nuclear	yes	strong	>75%	nuclear	yes	strong	>75%	nuclear	yes	strong	>75%	nuclear	yes	strong	>75%	nuclear	yes	strong	>75%	nuclear
ENSG00000131143	HPA002485	yes	moderate	75%-25%	cytoplasmic	yes	moderate	>75%	cytoplasmic	yes	moderate	>75%	cytoplasmic	yes	negative	not set	not set	yes	negative	not set	not set	yes	moderate	75%-25%	cytoplasmic	yes	negative	not set	not set	yes	negative	not set	not set
ENSG00000107262	CAB002486	yes	moderate	<25%	nuclear	yes	moderate	<25%	cytoplasmic	yes	negative	not set	not set	yes	negative	not set	not set	yes	negative	not set	not set	yes	negative	not set	not set	yes	negative	not set	not set	yes	negative	not set	not set
ENSG00000010278	CAB002490	yes	moderate	75%-25%	membrane	yes	negative	not set	not set	yes	moderate	75%-25%	membrane	yes	negative	not set	not set	yes	moderate	<25%	membrane	yes	negative	not set	not set	yes	moderate	75%-25%	membrane	yes	moderate	<25%	membrane
ENSG00000138448	CAB002499	yes	moderate	>75%	cytoplasmic,membrane	yes	negative	not set	not set	yes	negative	not set	not set	yes	negative	not set	not set	yes	negative	not set	not set	yes	negative	not set	not set	yes	strong	>75%	cytoplasmic,membrane	yes	negative	not set	not set
ENSG00000109956	CAB002500	yes	negative	not set	not set	yes	moderate	>75%	cytoplasmic,membrane	yes	negative	not set	not set	yes	negative	not set	not set	yes	negative	not set	not set	yes	negative	not set	not set	yes	negative	not set	not set	yes	negative	not set	not set
ENSG00000110651	CAB002507	yes	negative	not set	not set	yes	negative	not set	not set	yes	negative	not set	not set	yes	moderate	>75%	cytoplasmic	yes	negative	not set	not set	yes	negative	not set	not set	yes	strong	75%-25%	membrane	yes	negative	not set	not set
ENSG00000112149	CAB002509	yes	moderate	>75%	cytoplasmic,membrane	yes	negative	not set	not set	yes	moderate	75%-25%	cytoplasmic	yes	negative	not set	not set	yes	negative	not set	not set	yes	negative	not set	not set	yes	negative	not set	not set	yes	negative	not set	not set
ENSG00000135636	CAB002510	yes	weak	75%-25%	cytoplasmic	yes	negative	not set	not set	yes	negative	not set	not set	yes	negative	not set	not set	yes	negative	not set	not set	yes	negative	not set	not set	yes	moderate	75%-25%	membrane	yes	negative	not set	not set
ENSG00000028277	CAB002513	yes	negative	not set	not set	yes	negative	not set	not set	yes	negative	not set	not set	yes	negative	not set	not set	yes	negative	not set	not set	yes	negative	not set	not set	yes	negative	not set	not set	yes	strong	>75%	nuclear
ENSG00000100823	HPA002564	yes	moderate	>75%	nuclear	yes	negative	not set	not set	yes	negative	not set	not set	yes	moderate	>75%	nuclear	yes	negative	not set	not set	yes	negative	not set	not set	yes	moderate	>75%	nuclear	yes	strong	75%-25%	nuclear
ENSG00000100815	HPA002570	yes	moderate	>75%	cytoplasmic	yes	negative	not set	not set	yes	strong	75%-25%	cytoplasmic	yes	negative	not set	not set	yes	negative	not set	not set	yes	negative	not set	not set	yes	moderate	>75%	cytoplasmic	yes	negative	not set	not set
ENSG00000154277	CAB002580	yes	negative	not set	not set	yes	negative	not set	not set	yes	negative	not set	not set	yes	negative	not set	not set	yes	negative	not set	not set	yes	negative	not set	not set	yes	moderate	75%-25%	cytoplasmic,membrane	yes	moderate	75%-25%
ENSG00000177885	CAB002589	yes	moderate	75%-25%	cytoplasmic,nuclear	yes	negative	not set	not set	yes	negative	not set	not set	yes	negative	not set	not set	yes	negative	not set	not set	yes	negative	not set	not set	yes	negative	not set	not set	yes	moderate	75%-25%	nuclear
ENSG00000143190	CAB002608	yes	negative	not set	not set	yes	negative	not set	not set	yes	negative	not set	not set	yes	negative	not set	not set	yes	strong	>75%	nuclear	yes	negative	not set	not set	yes	moderate	>75%	nuclear	yes	moderate	75%-25%	nuclear
ENSG00000198681	CAB002620	yes	negative	not set	not set	yes	moderate	>75%	cytoplasmic	yes	weak	75%-25%	cytoplasmic	yes	negative	not set	not set	yes	moderate	<25%	cytoplasmic	yes	moderate	<25%	cytoplasmic	yes	negative	not set	not set	yes	strong	>75%	cytoplasmic
ENSG00000115085	CAB002625	yes	moderate	>75%	cytoplasmic,membrane	yes	negative	not set	not set	yes	negative	not set	not set	yes	negative	not set	not set	yes	negative	not set	not set	yes	negative	not set	not set	yes	moderate	>75%	cytoplasmic,membrane	yes	negative	not set	not set
ENSG00000197157	HPA002632	yes	moderate	>75%	cytoplasmic	yes	negative	not set	not set	yes	negative	not set	not set	yes	negative	not set	not set	yes	negative	not set	not set	yes	negative	not set	not set	yes	moderate	>75%	cytoplasmic,membrane	yes	moderate	75%-25%	cytoplasmic
ENSG00000105810	HPA002637	yes	negative	not set	not set	yes	negative	not set	not set	yes	moderate	75%-25%	nuclear	yes	negative	not set	not set	yes	moderate	75%-25%	nuclear	yes	negative	not set	not set	yes	negative	not set	not set	yes	moderate	>75%
ENSG00000132155	HPA002640	yes	moderate	75%-25%	nuclear	yes	negative	not set	not set	yes	moderate	<25%	nuclear	yes	negative	not set	not set	yes	moderate	<25%	nuclear	yes	negative	not set	not set	yes	negative	not set	not set	yes	negative	not set	not set
ENSG00000167004	HPA002645	yes	moderate	>75%	cytoplasmic	yes	negative	not set	not set	yes	strong	<25%	cytoplasmic	yes	negative	not set	not set	yes	negative	not set	not set	yes	moderate	<25%	cytoplasmic	yes	moderate	75%-25%	cytoplasmic	yes	negative	not set	not set
ENSG00000122705	CAB002665	yes	moderate	>75%	cytoplasmic	yes	negative	not set	not set	yes	negative	not set	not set	yes	negative	not set	not set	yes	negative	not set	not set	yes	negative	not set	not set	yes	moderate	>75%	cytoplasmic	yes	moderate	75%-25%	cytoplasmic
ENSG00000097046	CAB002669	yes	weak	75%-25%	cytoplasmic	yes	weak	<25%	nuclear	yes	strong	>75%	nuclear	yes	negative	not set	not set	yes	moderate	>75%	nuclear	yes	moderate	>75%	nuclear	yes	negative	not set	not set	yes	weak	>75%	nuclear
ENSG00000055130	CAB002676	yes	moderate	75%-25%	nuclear	yes	negative	not set	not set	yes	negative	not set	not set	yes	negative	not set	not set	yes	negative	not set	not set	yes	negative	not set	not set	yes	moderate	75%-25%	nuclear	yes	moderate	<25%	nuclear
ENSG00000108094	CAB002677	yes	moderate	75%-25%	nuclear	yes	strong	>75%	cytoplasmic,nuclear	yes	strong	>75%	nuclear	yes	negative	not set	not set	yes	strong	>75%	cytoplasmic	yes	strong	>75%	nuclear	yes	weak	>75%	nuclear	yes	strong	>75%	cytoplasmic,nuclear
ENSG00000189283	CAB002684	yes	moderate	>75%	cytoplasmic	yes	negative	not set	not set	yes	negative	not set	not set	yes	negative	not set	not set	yes	negative	not set	not set	yes	negative	not set	not set	yes	moderate	>75%	cytoplasmic,nuclear	yes	negative	not set	not set
ENSG00000137752	CAB002685	yes	weak	<25%	cytoplasmic	yes	negative	not set	not set	yes	negative	not set	not set	yes	negative	not set	not set	yes	negative	not set	not set	yes	moderate	>75%	nuclear	yes	negative	not set	not set	yes	negative	not set	not set
ENSG00000020922	HPA002691	yes	strong	>75%	nuclear	yes	moderate	>75%	cytoplasmic	yes	strong	75%-25%	nuclear	yes	moderate	>75%	nuclear	yes	strong	>75%	nuclear	yes	moderate	>75%	nuclear	yes	strong	>75%	nuclear	yes	strong	>75%	nuclear
ENSG00000198604	HPA002730	yes	negative	not set	not set	yes	negative	not set	not set	yes	strong	>75%	nuclear	yes	negative	not set	not set	yes	strong	75%-25%	nuclear	yes	strong	>75%	nuclear	yes	moderate	>75%	nuclear	yes	negative	not set	not set
ENSG00000142676	HPA002734	yes	moderate	75%-25%	cytoplasmic,membrane	yes	weak	75%-25%	cytoplasmic,membrane	yes	negative	not set	not set	yes	negative	not set	not set	yes	moderate	<25%	cytoplasmic	yes	negative	not set	not set	yes	negative	not set	not set	yes	moderate	<25%	cytoplasmic
ENSG00000243710	HPA002736	yes	weak	<25%	nuclear	yes	weak	<25%	cytoplasmic,membrane	yes	weak	<25%	cytoplasmic,membrane	yes	negative	not set	not set	yes	weak	<25%	cytoplasmic,membrane	yes	moderate	>75%	cytoplasmic,membrane	yes	negative	not set	not set	yes	negative	not set	not set
ENSG00000059804	CAB002763	yes	negative	not set	not set	yes	strong	>75%	cytoplasmic	yes	strong	>75%	cytoplasmic	yes	negative	not set	not set	yes	negative	not set	not set	yes	strong	>75%	cytoplasmic	yes	negative	not set	not set	yes	negative	not set	not set
ENSG00000144381	CAB002775	yes	moderate	75%-25%	cytoplasmic	yes	weak	>75%	cytoplasmic	yes	negative	not set	not set	yes	negative	not set	not set	yes	negative	not set	not set	yes	negative	not set	not set	yes	moderate	75%-25%	cytoplasmic	yes	negative	not set	not set
ENSG00000176890	CAB002784	yes	weak	<25%	cytoplasmic	yes	negative	not set	not set	yes	negative	not set	not set	yes	negative	not set	not set	yes	strong	>75%	nuclear	yes	negative	not set	not set	yes	weak	75%-25%	cytoplasmic	yes	moderate	<25%	nuclear
ENSG00000170430	CAB002786	yes	negative	not set	not set	yes	negative	not set	not set	yes	strong	>75%	nuclear	yes	negative	not set	not set	yes	strong	75%-25%	nuclear	yes	strong	>75%	nuclear	yes	negative	not set	not set	yes	strong	>75%	nuclear
ENSG00000149636	HPA002813	yes	moderate	>75%	nuclear	yes	weak	>75%	cytoplasmic	yes	moderate	>75%	nuclear	yes	moderate	>75%	nuclear	yes	moderate	>75%	nuclear	yes	moderate	>75%	nuclear	yes	moderate	>75%	nuclear	yes	moderate	>75%	nuclear
ENSG00000099795	HPA002817	yes	moderate	>75%	cytoplasmic	yes	negative	not set	not set	yes	negative	not set	not set	yes	negative	not set	not set	yes	negative	not set	not set	yes	negative	not set	not set	yes	negative	not set	not set	yes	moderate	<25%	cytoplasmic
ENSG00000214107	HPA002820	yes	negative	not set	not set	yes	negative	not set	not set	yes	negative	not set	not set	yes	negative	not set	not set	yes	negative	not set	not set	yes	negative	not set	not set	yes	negative	not set	not set	yes	moderate	<25%	cytoplasmic,nuclear
ENSG00000134452	HPA002844	yes	strong	>75%	nuclear	yes	negative	not set	not set	yes	strong	>75%	nuclear	yes	strong	>75%	nuclear	yes	moderate	>75%	nuclear	yes	moderate	>75%	nuclear	yes	moderate	75%-25%	nuclear	yes	strong	75%-25%	nuclear
ENSG00000008086	HPA002847	yes	negative	not set	not set	yes	negative	not set	not set	yes	negative	not set	not set	yes	negative	not set	not set	yes	moderate	75%-25%	nuclear	yes	negative	not set	not set	yes	negative	not set	not set	yes	moderate	75%-25%	nuclear
ENSG00000243279	HPA002859	yes	strong	>75%	cytoplasmic	yes	negative	not set	not set	yes	negative	not set	not set	yes	negative	not set	not set	yes	negative	not set	not set	yes	negative	not set	not set	yes	strong	>75%	cytoplasmic	yes	negative	not set	not set
ENSG00000099624	HPA002865	yes	moderate	>75%	cytoplasmic	yes	moderate	75%-25%	cytoplasmic	yes	negative	not set	not set	yes	negative	not set	not set	yes	negative	not set	not set	yes	negative	not set	not set	yes	negative	not set	not set	yes	moderate	<25%	cytoplasmic
ENSG00000106028	HPA002866	yes	moderate	75%-25%	cytoplasmic	yes	negative	not set	not set	yes	moderate	75%-25%	cytoplasmic	yes	negative	not set	not set	yes	negative	not set	not set	yes	negative	not set	not set	yes	moderate	75%-25%	cytoplasmic	yes	strong	>75%	cytoplasmic
ENSG00000197555	HPA002875	yes	moderate	>75%	cytoplasmic,membrane	yes	weak	>75%	cytoplasmic,membrane	yes	moderate	>75%	cytoplasmic,membrane	yes	moderate	75%-25%	cytoplasmic,nuclear	yes	strong	<25%	cytoplasmic,membrane,nuclear	yes	strong	>75%	cytoplasmic,nuclear	yes	weak	>75%	cytoplasmic,membrane	yes	strong	75%-25%	cytoplasmic,membrane,nuclear
ENSG00000142208	HPA002891	yes	moderate	>75%	cytoplasmic,nuclear	yes	strong	>75%	nuclear	yes	moderate	>75%	nuclear	yes	moderate	75%-25%	nuclear	yes	moderate	>75%	nuclear	yes	strong	>75%	nuclear	yes	strong	>75%	cytoplasmic,nuclear	yes	moderate	>75%	nuclear
ENSG00000165506	HPA002894	yes	weak	>75%	cytoplasmic	yes	negative	not set	not set	yes	strong	>75%	cytoplasmic,membrane	yes	negative	not set	not set	yes	negative	not set	not set	yes	negative	not set	not set	yes	moderate	>75%	cytoplasmic	yes	negative	not set	not set
ENSG00000165861	HPA002898	yes	weak	>75%	cytoplasmic	yes	negative	not set	not set	yes	negative	not set	not set	yes	negative	not set	not set	yes	negative	not set	not set	yes	negative	not set	not set	yes	weak	>75%	cytoplasmic	yes	moderate	75%-25%	cytoplasmic
ENSG00000114771	HPA002911	yes	weak	>75%	cytoplasmic	yes	negative	not set	not set	yes	negative	not set	not set	yes	negative	not set	not set	yes	negative	not set	not set	yes	strong	75%-25%	nuclear	yes	negative	not set	not set	yes	negative	not set	not set
ENSG00000044446	HPA002912	yes	weak	75%-25%	cytoplasmic	yes	negative	not set	not set	yes	negative	not set	not set	yes	weak	75%-25%	cytoplasmic	yes	negative	not set	not set	yes	negative	not set	not set	yes	moderate	75%-25%	cytoplasmic	yes	negative	not set	not set
ENSG00000079482	HPA002919	yes	weak	75%-25%	cytoplasmic	yes	negative	not set	not set	yes	negative	not set	not set	yes	negative	not set	not set	yes	negative	not set	not set	yes	strong	75%-25%	nuclear	yes	negative	not set	not set	yes	negative	not set	not set
ENSG00000136826	HPA002926	yes	moderate	>75%	cytoplasmic,nuclear	yes	negative	not set	not set	yes	negative	not set	not set	yes	negative	not set	not set	yes	negative	not set	not set	yes	strong	>75%	nuclear	yes	negative	not set	not set	yes	weak	75%-25%	nuclear
ENSG00000004961	HPA002946	yes	negative	not set	not set	yes	negative	not set	not set	yes	moderate	<25%	cytoplasmic	yes	negative	not set	not set	yes	moderate	<25%	cytoplasmic	yes	negative	not set	not set	yes	negative	not set	not set	yes	moderate	<25%	cytoplasmic
ENSG00000101868	HPA002947	yes	weak	<25%	nuclear	yes	negative	not set	not set	yes	weak	>75%	nuclear	yes	negative	not set	not set	yes	moderate	>75%	nuclear	yes	moderate	75%-25%	nuclear	yes	negative	not set	not set	yes	moderate	>75%	nuclear
ENSG00000120498	HPA002950	yes	negative	not set	not set	yes	negative	not set	not set	yes	moderate	>75%	nuclear	yes	negative	not set	not set	yes	strong	75%-25%	nuclear	yes	negative	not set	not set	yes	negative	not set	not set	yes	moderate	75%-25%	nuclear
ENSG00000163131	HPA002988	yes	moderate	<25%	cytoplasmic	yes	negative	not set	not set	yes	negative	not set	not set	yes	negative	not set	not set	yes	negative	not set	not set	yes	negative	not set	not set	yes	moderate	<25%	cytoplasmic	yes	negative	not set	not set
ENSG00000116044	HPA002990	yes	moderate	>75%	cytoplasmic	yes	negative	not set	not set	yes	strong	<25%	cytoplasmic	yes	negative	not set	not set	yes	negative	not set	not set	yes	strong	75%-25%	nuclear	yes	moderate	>75%	cytoplasmic	yes	moderate	75%-25%	nuclear
ENSG00000121152	HPA003008	yes	negative	not set	not set	yes	negative	not set	not set	yes	moderate	>75%	cytoplasmic,membrane	yes	negative	not set	not set	yes	strong	75%-25%	cytoplasmic,membrane	yes	strong	>75%	cytoplasmic,membrane	yes	negative	not set	not set	yes	moderate	75%-25%	cytoplasmic,membrane
ENSG00000119689	HPA003010	yes	strong	75%-25%	cytoplasmic	yes	moderate	75%-25%	cytoplasmic	yes	weak	75%-25%	cytoplasmic	yes	negative	not set	not set	yes	weak	75%-25%	cytoplasmic	yes	weak	75%-25%	cytoplasmic	yes	negative	not set	not set	yes	strong	75%-25%	cytoplasmic
ENSG00000176171	HPA003015	yes	strong	>75%	cytoplasmic	yes	negative	not set	not set	yes	negative	not set	not set	yes	negative	not set	not set	yes	negative	not set	not set	yes	negative	not set	not set	yes	weak	>75%	cytoplasmic	yes	strong	75%-25%	cytoplasmic
ENSG00000119707	HPA003025	yes	weak	>75%	cytoplasmic	yes	negative	not set	not set	yes	moderate	<25%	nuclear	yes	negative	not set	not set	yes	strong	75%-25%	nuclear	yes	strong	<25%	nuclear	yes	weak	>75%	cytoplasmic,nuclear	yes	strong	75%-25%	nuclear
ENSG00000100129	HPA003028	yes	weak	75%-25%	cytoplasmic	yes	negative	not set	not set	yes	strong	>75%	nuclear	yes	negative	not set	not set	yes	moderate	<25%	nuclear	yes	moderate	<25%	nuclear	yes	negative	not set	not set	yes	negative	not set	not set
ENSG00000100216	HPA003037	yes	strong	>75%	cytoplasmic	yes	negative	not set	not set	yes	strong	>75%	cytoplasmic	yes	negative	not set	not set	yes	negative	not set	not set	yes	negative	not set	not set	yes	strong	>75%	cytoplasmic	yes	strong	>75%	cytoplasmic
ENSG00000128311	HPA003044	yes	strong	>75%	cytoplasmic	yes	negative	not set	not set	yes	negative	not set	not set	yes	negative	not set	not set	yes	negative	not set	not set	yes	strong	<25%	cytoplasmic	yes	strong	<25%	cytoplasmic	yes	negative	not set	not set
ENSG00000198934	HPA003047	yes	strong	75%-25%	cytoplasmic,membrane	yes	weak	>75%	cytoplasmic,membrane	yes	moderate	>75%	cytoplasmic,membrane	yes	negative	not set	not set	yes	negative	not set	not set	yes	strong	>75%	cytoplasmic	yes	negative	not set	not set	yes	negative	not set	not set
ENSG00000100902	HPA003049	yes	strong	<25%	nuclear	yes	moderate	>75%	cytoplasmic	yes	moderate	75%-25%	nuclear	yes	negative	not set	not set	yes	strong	<25%	nuclear	yes	strong	75%-25%	cytoplasmic,nuclear	yes	moderate	>75%	nuclear	yes	strong	<25%	nuclear
ENSG00000102048	HPA003060	yes	weak	75%-25%	cytoplasmic,membrane	yes	weak	>75%	cytoplasmic,membrane	yes	weak	75%-25%	cytoplasmic,membrane,nuclear	yes	negative	not set	not set	yes	strong	75%-25%	nuclear	yes	weak	75%-25%	cytoplasmic,membrane	yes	negative	not set	not set	yes	strong	75%-25%	nuclear
ENSG00000176635	HPA003074	yes	strong	>75%	cytoplasmic	yes	negative	not set	not set	yes	moderate	>75%	nuclear	yes	negative	not set	not set	yes	weak	<25%	nuclear	yes	negative	not set	not set	yes	negative	not set	not set	yes	negative	not set	not set
ENSG00000184436	HPA003083	yes	negative	not set	not set	yes	negative	not set	not set	yes	negative	not set	not set	yes	negative	not set	not set	yes	moderate	>75%	cytoplasmic,nuclear	yes	negative	not set	not set	yes	negative	not set	not set	yes	moderate	>75%	cytoplasmic,nuclear
ENSG00000140022	HPA003086	yes	negative	not set	not set	yes	negative	not set	not set	yes	moderate	<25%	cytoplasmic	yes	negative	not set	not set	yes	negative	not set	not set	yes	moderate	<25%	cytoplasmic	yes	negative	not set	not set	yes	moderate	75%-25%	cytoplasmic
ENSG00000119636	HPA003090	yes	negative	not set	not set	yes	moderate	<25%	cytoplasmic	yes	negative	not set	not set	yes	negative	not set	not set	yes	negative	not set	not set	yes	negative	not set	not set	yes	negative	not set	not set	yes	weak	<25%	cytoplasmic
ENSG00000123595	HPA003094	yes	strong	>75%	cytoplasmic	yes	negative	not set	not set	yes	negative	not set	not set	yes	negative	not set	not set	yes	negative	not set	not set	yes	negative	not set	not set	yes	moderate	>75%	cytoplasmic	yes	negative	not set	not set
ENSG00000102226	HPA003103	yes	negative	not set	not set	yes	weak	<25%	cytoplasmic	yes	negative	not set	not set	yes	negative	not set	not set	yes	negative	not set	not set	yes	negative	not set	not set	yes	negative	not set	not set	yes	strong	>75%	cytoplasmic,nuclear
ENSG00000156030	HPA003111	yes	moderate	75%-25%	nuclear	yes	negative	not set	not set	yes	negative	not set	not set	yes	negative	not set	not set	yes	negative	not set	not set	yes	negative	not set	not set	yes	weak	>75%	nuclear	yes	strong	>75%	nuclear
ENSG00000123165	HPA003119	yes	weak	>75%	cytoplasmic	yes	moderate	>75%	cytoplasmic,nuclear	yes	negative	not set	not set	yes	negative	not set	not set	yes	negative	not set	not set	yes	strong	75%-25%	cytoplasmic,nuclear	yes	negative	not set	not set	yes	negative	not set	not set
ENSG00000187581	HPA003127	yes	moderate	>75%	cytoplasmic	yes	negative	not set	not set	yes	negative	not set	not set	yes	negative	not set	not set	yes	negative	not set	not set	yes	negative	not set	not set	yes	moderate	>75%	cytoplasmic	yes	negative	not set	not set
ENSG00000100393	HPA003128	yes	negative	not set	not set	yes	strong	75%-25%	cytoplasmic	yes	negative	not set	not set	yes	negative	not set	not set	yes	negative	not set	not set	yes	negative	not set	not set	yes	moderate	>75%	nuclear	yes	negative	not set	not set
ENSG00000197857	HPA003146	yes	weak	75%-25%	cytoplasmic	yes	negative	not set	not set	yes	negative	not set	not set	yes	negative	not set	not set	yes	negative	not set	not set	yes	negative	not set	not set	yes	weak	>75%	cytoplasmic	yes	strong	75%-25%	nuclear
ENSG00000131981	HPA003162	yes	moderate	>75%	cytoplasmic	yes	moderate	>75%	cytoplasmic	yes	negative	not set	not set	yes	negative	not set	not set	yes	negative	not set	not set	yes	moderate	75%-25%	cytoplasmic	yes	negative	not set	not set	yes	negative	not set	not set
ENSG00000126777	HPA003178	yes	moderate	>75%	cytoplasmic	yes	moderate	75%-25%	cytoplasmic	yes	strong	75%-25%	cytoplasmic	yes	negative	not set	not set	yes	strong	75%-25%	cytoplasmic	yes	strong	>75%	cytoplasmic	yes	moderate	>75%	cytoplasmic	yes	strong	75%-25%	cytoplasmic
ENSG00000184634	HPA003184	yes	moderate	75%-25%	cytoplasmic,nuclear	yes	negative	not set	not set	yes	strong	75%-25%	nuclear	yes	moderate	<25%	nuclear	yes	strong	<25%	nuclear	yes	strong	75%-25%	nuclear	yes	moderate	75%-25%	nuclear	yes	strong	75%-25%	nuclear
ENSG00000184634	HPA003185	yes	strong	75%-25%	cytoplasmic	yes	negative	not set	not set	yes	moderate	<25%	cytoplasmic	yes	negative	not set	not set	yes	negative	not set	not set	yes	moderate	<25%	cytoplasmic	yes	negative	not set	not set	yes	negative	not set	not set
ENSG00000184831	HPA003187	yes	strong	75%-25%	cytoplasmic	yes	negative	not set	not set	yes	moderate	<25%	nuclear	yes	negative	not set	not set	yes	negative	not set	not set	yes	negative	not set	not set	yes	moderate	<25%	cytoplasmic	yes	strong	<25%	cytoplasmic
ENSG00000166226	HPA003197	yes	weak	>75%	cytoplasmic,membrane	yes	strong	>75%	cytoplasmic,membrane	yes	strong	>75%	cytoplasmic,membrane	yes	negative	not set	not set	yes	strong	>75%	cytoplasmic,membrane	yes	strong	>75%	cytoplasmic,membrane	yes	negative	not set	not set	yes	strong	>75%	cytoplasmic,membrane
ENSG00000166226	HPA003198	yes	weak	>75%	cytoplasmic,membrane	yes	strong	>75%	cytoplasmic,membrane	yes	strong	>75%		yes	negative	not set	not set	yes	strong	>75%		yes	strong	>75%	cytoplasmic,membrane	yes	weak	>75%	cytoplasmic,membrane	yes	strong	>75%	cytoplasmic,membrane
ENSG00000181433	HPA003208	yes	negative	not set	not set	yes	negative	not set	not set	yes	negative	not set	not set	yes	negative	not set	not set	yes	strong	>75%	nuclear	yes	negative	not set	not set	yes	negative	not set	not set	yes	strong	>75%	nuclear
ENSG00000147130	HPA003211	yes	strong	>75%	nuclear	yes	negative	not set	not set	yes	negative	not set	not set	yes	strong	75%-25%	nuclear	yes	strong	>75%	nuclear	yes	negative	not set	not set	yes	strong	>75%	nuclear	yes	strong	>75%	nuclear
ENSG00000087263	HPA003215	yes	moderate	<25%	nuclear	yes	negative	not set	not set	yes	moderate	75%-25%	nuclear	yes	weak	<25%	cytoplasmic	yes	strong	<25%	nuclear	yes	negative	not set	not set	yes	moderate	<25%	nuclear	yes	strong	<25%	nuclear
ENSG00000112655	HPA003222	yes	negative	not set	not set	yes	weak	<25%	cytoplasmic	yes	negative	not set	not set	yes	negative	not set	not set	yes	negative	not set	not set	yes	negative	not set	not set	yes	negative	not set	not set	yes	moderate	<25%	cytoplasmic
ENSG00000188419	HPA003231	yes	moderate	75%-25%	cytoplasmic	yes	moderate	>75%	cytoplasmic,membrane	yes	moderate	>75%	nuclear	yes	negative	not set	not set	yes	moderate	>75%	nuclear	yes	moderate	>75%	nuclear	yes	negative	not set	not set	yes	moderate	>75%	nuclear
ENSG00000130224	HPA003233	yes	moderate	<25%	cytoplasmic	yes	negative	not set	not set	yes	negative	not set	not set	yes	negative	not set	not set	yes	negative	not set	not set	yes	negative	not set	not set	yes	strong	<25%	cytoplasmic	yes	negative	not set	not set
ENSG00000120265	HPA003239	yes	weak	>75%	cytoplasmic	yes	negative	not set	not set	yes	weak	75%-25%	cytoplasmic	yes	negative	not set	not set	yes	negative	not set	not set	yes	moderate	75%-25%	cytoplasmic	yes	moderate	>75%	cytoplasmic	yes	negative	not set	not set
ENSG00000151967,ENSG00000283154	HPA003243	yes	weak	>75%	cytoplasmic	yes	moderate	>75%	cytoplasmic,membrane	yes	negative	not set	not set	yes	negative	not set	not set	yes	negative	not set	not set	yes	negative	not set	not set	yes	negative	not set	not set	yes	moderate	75%-25%	cytoplasmic,membrane
ENSG00000154727	HPA003258	yes	weak	>75%	nuclear	yes	negative	not set	not set	yes	moderate	75%-25%	nuclear	yes	negative	not set	not set	yes	moderate	>75%	nuclear	yes	moderate	<25%	nuclear	yes	weak	>75%	nuclear	yes	moderate	>75%	nuclear
ENSG00000166478	HPA003263	yes	weak	75%-25%	nuclear	yes	negative	not set	not set	yes	moderate	75%-25%	nuclear	yes	negative	not set	not set	yes	negative	not set	not set	yes	negative	not set	not set	yes	moderate	>75%	nuclear	yes	moderate	>75%	nuclear
ENSG00000198087	HPA003267	yes	weak	<25%	cytoplasmic	yes	negative	not set	not set	yes	negative	not set	not set	yes	moderate	<25%	cytoplasmic	yes	negative	not set	not set	yes	negative	not set	not set	yes	strong	>75%	cytoplasmic	yes	negative	not set	not set
ENSG00000167085	HPA003280	yes	strong	>75%	cytoplasmic	yes	negative	not set	not set	yes	negative	not set	not set	yes	negative	not set	not set	yes	negative	not set	not set	yes	negative	not set	not set	yes	moderate	>75%	cytoplasmic	yes	strong	75%-25%	cytoplasmic
ENSG00000109107	HPA003282	yes	moderate	>75%	cytoplasmic,membrane	yes	moderate	>75%	cytoplasmic,membrane	yes	negative	not set	not set	yes	negative	not set	not set	yes	moderate	75%-25%	cytoplasmic,membrane	yes	negative	not set	not set	yes	negative	not set	not set	yes	moderate	75%-25%	cytoplasmic,membrane
ENSG00000109046	HPA003293	yes	negative	not set	not set	yes	negative	not set	not set	yes	negative	not set	not set	yes	negative	not set	not set	yes	negative	not set	not set	yes	moderate	<25%	nuclear	yes	negative	not set	not set	yes	negative	not set	not set
ENSG00000177483	HPA003298	yes	negative	not set	not set	yes	weak	75%-25%	cytoplasmic	yes	strong	>75%	cytoplasmic	yes	negative	not set	not set	yes	moderate	>75%	cytoplasmic	yes	weak	>75%	cytoplasmic	yes	negative	not set	not set	yes	negative	not set	not set
ENSG00000131721,ENSG00000203989	HPA003314	yes	negative	not set	not set	yes	negative	not set	not set	yes	moderate	75%-25%	cytoplasmic	yes	negative	not set	not set	yes	moderate	>75%	nuclear	yes	negative	not set	not set	yes	negative	not set	not set	yes	strong	>75%	nuclear
ENSG00000184470	HPA003323	yes	strong	>75%	cytoplasmic	yes	negative	not set	not set	yes	moderate	<25%	cytoplasmic	yes	negative	not set	not set	yes	negative	not set	not set	yes	negative	not set	not set	yes	negative	not set	not set	yes	strong	>75%	cytoplasmic
ENSG00000155380	HPA003324	yes	negative	not set	not set	yes	negative	not set	not set	yes	negative	not set	not set	yes	negative	not set	not set	yes	negative	not set	not set	yes	negative	not set	not set	yes	strong	>75%	cytoplasmic,membrane	yes	negative	not set	not set
ENSG00000156587	HPA003328	yes	weak	>75%	cytoplasmic	yes	moderate	>75%	cytoplasmic	yes	moderate	<25%	cytoplasmic	yes	negative	not set	not set	yes	negative	not set	not set	yes	moderate	>75%	cytoplasmic	yes	negative	not set	not set	yes	negative	not set	not set
ENSG00000184787	HPA003332	yes	weak	>75%	cytoplasmic,membrane	yes	moderate	>75%	cytoplasmic,membrane	yes	moderate	>75%	cytoplasmic,membrane	yes	negative	not set	not set	yes	strong	75%-25%	cytoplasmic,membrane	yes	moderate	>75%	cytoplasmic,membrane	yes	negative	not set	not set	yes	strong	>75%	cytoplasmic,membrane
ENSG00000124260	HPA003333	yes	weak	75%-25%	cytoplasmic	yes	negative	not set	not set	yes	negative	not set	not set	yes	negative	not set	not set	yes	weak	<25%	nuclear	yes	negative	not set	not set	yes	moderate	>75%	cytoplasmic	yes	moderate	<25%	nuclear
ENSG00000130829	HPA003336	yes	negative	not set	not set	yes	moderate	>75%	cytoplasmic,membrane	yes	negative	not set	not set	yes	negative	not set	not set	yes	negative	not set	not set	yes	moderate	>75%	cytoplasmic,membrane	yes	negative	not set	not set	yes	negative	not set	not set
ENSG00000134121	HPA003345	yes	negative	not set	not set	yes	negative	not set	not set	yes	weak	75%-25%	cytoplasmic,nuclear	yes	negative	not set	not set	yes	negative	not set	not set	yes	negative	not set	not set	yes	negative	not set	not set	yes	moderate	>75%	nuclear
ENSG00000185252	HPA003354	yes	moderate	75%-25%	nuclear	yes	negative	not set	not set	yes	negative	not set	not set	yes	negative	not set	not set	yes	moderate	75%-25%	nuclear	yes	negative	not set	not set	yes	negative	not set	not set	yes	negative	not set	not set
ENSG00000187516	HPA003356	yes	negative	not set	not set	yes	moderate	>75%	cytoplasmic,membrane	yes	negative	not set	not set	yes	negative	not set	not set	yes	negative	not set	not set	yes	negative	not set	not set	yes	negative	not set	not set	yes	negative	not set	not set
ENSG00000167635	HPA003358	yes	moderate	75%-25%	nuclear	yes	negative	not set	not set	yes	negative	not set	not set	yes	moderate	>75%	nuclear	yes	moderate	<25%	nuclear	yes	strong	>75%	nuclear	yes	moderate	>75%	nuclear	yes	strong	>75%	nuclear
ENSG00000156983	HPA003359	yes	moderate	>75%	cytoplasmic,nuclear	yes	negative	not set	not set	yes	moderate	>75%	nuclear	yes	negative	not set	not set	yes	moderate	>75%	nuclear	yes	moderate	>75%	nuclear	yes	moderate	>75%	nuclear	yes	strong	75%-25%	nuclear
ENSG00000171858	HPA003371	yes	moderate	>75%	cytoplasmic	yes	negative	not set	not set	yes	negative	not set	not set	yes	negative	not set	not set	yes	negative	not set	not set	yes	negative	not set	not set	yes	weak	>75%	cytoplasmic	yes	negative	not set	not set
ENSG00000187969	HPA003382	yes	weak	>75%	cytoplasmic	yes	strong	>75%	cytoplasmic	yes	negative	not set	not set	yes	negative	not set	not set	yes	negative	not set	not set	yes	weak	75%-25%	cytoplasmic	yes	negative	not set	not set	yes	negative	not set	not set
ENSG00000170653,ENSG00000267281	HPA003384	yes	weak	75%-25%	nuclear	yes	negative	not set	not set	yes	negative	not set	not set	yes	negative	not set	not set	yes	negative	not set	not set	yes	negative	not set	not set	yes	moderate	>75%	nuclear	yes	negative	not set	not set
ENSG00000170312	HPA003387	yes	negative	not set	not set	yes	negative	not set	not set	yes	strong	>75%		yes	negative	not set	not set	yes	moderate	<25%		yes	negative	not set	not set	yes	negative	not set	not set	yes	moderate	<25%
ENSG00000151332	HPA003388	yes	weak	75%-25%	nuclear	yes	negative	not set	not set	yes	moderate	75%-25%	nuclear	yes	negative	not set	not set	yes	moderate	75%-25%	nuclear	yes	negative	not set	not set	yes	moderate	>75%	nuclear	yes	moderate	75%-25%	nuclear
ENSG00000119688	HPA003396	yes	moderate	75%-25%	cytoplasmic	yes	negative	not set	not set	yes	negative	not set	not set	yes	negative	not set	not set	yes	negative	not set	not set	yes	negative	not set	not set	yes	moderate	<25%	cytoplasmic	yes	negative	not set	not set
ENSG00000070182	HPA003398	yes	negative	not set	not set	yes	negative	not set	not set	yes	negative	not set	not set	yes	negative	not set	not set	yes	moderate	>75%	cytoplasmic,membrane	yes	negative	not set	not set	yes	negative	not set	not set	yes	moderate	>75%	cytoplasmic,membrane
ENSG00000197958	HPA003403	yes	weak	<25%	cytoplasmic,nuclear	yes	moderate	75%-25%	cytoplasmic,membrane	yes	moderate	<25%	cytoplasmic	yes	negative	not set	not set	yes	moderate	>75%	cytoplasmic,nuclear	yes	moderate	75%-25%	nuclear	yes	moderate	>75%	nuclear	yes	moderate	>75%	cytoplasmic,nuclear
ENSG00000178127	HPA003404	yes	moderate	75%-25%	cytoplasmic	yes	negative	not set	not set	yes	negative	not set	not set	yes	negative	not set	not set	yes	negative	not set	not set	yes	negative	not set	not set	yes	negative	not set	not set	yes	moderate	75%-25%	cytoplasmic
ENSG00000108774	HPA003426	yes	weak	75%-25%	cytoplasmic	yes	moderate	>75%	cytoplasmic	yes	strong	>75%	cytoplasmic	yes	negative	not set	not set	yes	weak	<25%	cytoplasmic,membrane	yes	strong	>75%	cytoplasmic,membrane	yes	weak	75%-25%	cytoplasmic	yes	negative	not set	not set
ENSG00000054654	HPA003435	yes	negative	not set	not set	yes	negative	not set	not set	yes	negative	not set	not set	yes	negative	not set	not set	yes	negative	not set	not set	yes	negative	not set	not set	yes	strong	<25%	membrane	yes	negative	not set	not set
ENSG00000171817	HPA003444	yes	strong	75%-25%	nuclear	yes	negative	not set	not set	yes	strong	75%-25%	nuclear	yes	moderate	75%-25%	nuclear	yes	strong	75%-25%	nuclear	yes	strong	>75%	nuclear	yes	negative	not set	not set	yes	strong	>75%	nuclear
ENSG00000068985	HPA003473	yes	negative	not set	not set	yes	weak	75%-25%	cytoplasmic	yes	moderate	>75%	cytoplasmic	yes	negative	not set	not set	yes	strong	>75%	cytoplasmic	yes	moderate	>75%	cytoplasmic	yes	negative	not set	not set	yes	strong	75%-25%	cytoplasmic
ENSG00000198315	HPA003483	yes	weak	75%-25%	cytoplasmic	yes	negative	not set	not set	yes	negative	not set	not set	yes	negative	not set	not set	yes	negative	not set	not set	yes	negative	not set	not set	yes	moderate	75%-25%	nuclear	yes	moderate	>75%	cytoplasmic
ENSG00000164104,ENSG00000189403	HPA003506	yes	moderate	>75%	nuclear	yes	negative	not set	not set	yes	strong	>75%	nuclear	yes	moderate	>75%	nuclear	yes	negative	not set	not set	yes	strong	>75%	nuclear	yes	negative	not set	not set	yes	strong	>75%	nuclear
ENSG00000010256	HPA003525	yes	strong	75%-25%	cytoplasmic	yes	negative	not set	not set	yes	negative	not set	not set	yes	negative	not set	not set	yes	negative	not set	not set	yes	negative	not set	not set	yes	moderate	75%-25%	cytoplasmic	yes	strong	75%-25%	cytoplasmic
ENSG00000189139	HPA003546	yes	weak	<25%	cytoplasmic	yes	strong	>75%	cytoplasmic	yes	strong	>75%	cytoplasmic	yes	negative	not set	not set	yes	negative	not set	not set	yes	strong	>75%	cytoplasmic	yes	negative	not set	not set	yes	negative	not set	not set
ENSG00000149269	HPA003565	yes	moderate	>75%	cytoplasmic	yes	strong	>75%	nuclear	yes	moderate	75%-25%	cytoplasmic	yes	negative	not set	not set	yes	moderate	75%-25%	cytoplasmic	yes	moderate	75%-25%	nuclear	yes	negative	not set	not set	yes	moderate	75%-25%	cytoplasmic
ENSG00000132274	HPA003575	yes	moderate	75%-25%	cytoplasmic,nuclear	yes	moderate	75%-25%	nuclear	yes	negative	not set	not set	yes	moderate	75%-25%	nuclear	yes	negative	not set	not set	yes	moderate	75%-25%	nuclear	yes	negative	not set	not set	yes	moderate	<25%	cytoplasmic,nuclear
ENSG00000092108	HPA003579	yes	moderate	>75%	cytoplasmic	yes	moderate	>75%	cytoplasmic	yes	moderate	>75%	cytoplasmic	yes	weak	75%-25%	cytoplasmic	yes	weak	>75%	cytoplasmic	yes	moderate	75%-25%	cytoplasmic	yes	moderate	75%-25%	cytoplasmic	yes	weak	>75%	cytoplasmic
ENSG00000071859	HPA003585	yes	strong	>75%	nuclear	yes	negative	not set	not set	yes	moderate	<25%	nuclear	yes	strong	>75%	nuclear	yes	strong	<25%	nuclear	yes	moderate	<25%	nuclear	yes	strong	75%-25%	nuclear	yes	strong	75%-25%	nuclear
ENSG00000151445	HPA003589	yes	moderate	75%-25%	cytoplasmic	yes	negative	not set	not set	yes	negative	not set	not set	yes	negative	not set	not set	yes	negative	not set	not set	yes	negative	not set	not set	yes	negative	not set	not set	yes	negative	not set	not set
ENSG00000165795	HPA003590	yes	moderate	>75%	cytoplasmic	yes	negative	not set	not set	yes	negative	not set	not set	yes	negative	not set	not set	yes	negative	not set	not set	yes	negative	not set	not set	yes	moderate	75%-25%	cytoplasmic	yes	negative	not set	not set
ENSG00000151445	HPA003593	yes	strong	>75%	cytoplasmic	yes	negative	not set	not set	yes	moderate	rare	cytoplasmic,membrane	yes	negative	not set	not set	yes	negative	not set	not set	yes	negative	not set	not set	yes	negative	not set	not set	yes	negative	not set	not set
ENSG00000101367	HPA003600	yes	moderate	75%-25%	cytoplasmic	yes	moderate	>75%	cytoplasmic	yes	moderate	>75%	cytoplasmic	yes	negative	not set	not set	yes	strong	>75%	cytoplasmic	yes	moderate	75%-25%	cytoplasmic	yes	strong	>75%	cytoplasmic	yes	strong	>75%	cytoplasmic
ENSG00000154473	HPA003601	yes	strong	75%-25%	nuclear	yes	negative	not set	not set	yes	strong	75%-25%	nuclear	yes	negative	not set	not set	yes	moderate	>75%	nuclear	yes	moderate	>75%	nuclear	yes	strong	75%-25%	nuclear	yes	moderate	>75%	nuclear
ENSG00000102317	HPA003624	yes	negative	not set	not set	yes	negative	not set	not set	yes	negative	not set	not set	yes	negative	not set	not set	yes	moderate	75%-25%	nuclear	yes	negative	not set	not set	yes	negative	not set	not set	yes	moderate	75%-25%	nuclear
ENSG00000167862	HPA003634	yes	moderate	>75%	cytoplasmic	yes	negative	not set	not set	yes	negative	not set	not set	yes	negative	not set	not set	yes	negative	not set	not set	yes	negative	not set	not set	yes	weak	>75%	cytoplasmic	yes	moderate	>75%	cytoplasmic
ENSG00000187105	HPA003642	yes	moderate	75%-25%	cytoplasmic	yes	moderate	<25%	cytoplasmic	yes	moderate	<25%	cytoplasmic	yes	negative	not set	not set	yes	negative	not set	not set	yes	weak	<25%	cytoplasmic	yes	negative	not set	not set	yes	negative	not set	not set
ENSG00000100246	HPA003647	yes	negative	not set	not set	yes	negative	not set	not set	yes	moderate	<25%	cytoplasmic	yes	negative	not set	not set	yes	negative	not set	not set	yes	moderate	75%-25%	cytoplasmic	yes	negative	not set	not set	yes	negative	not set	not set
ENSG00000115942	CAB003693	yes	negative	not set	not set	yes	negative	not set	not set	yes	strong	>75%	nuclear	yes	negative	not set	not set	yes	moderate	rare	nuclear	yes	strong	75%-25%	nuclear	yes	negative	not set	not set	yes	moderate	rare	nuclear
ENSG00000120948	CAB003703	yes	strong	>75%	nuclear	yes	negative	not set	not set	yes	strong	>75%	nuclear	yes	moderate	>75%	nuclear	yes	strong	>75%	nuclear	yes	strong	>75%	nuclear	yes	strong	>75%	nuclear	yes	strong	>75%	nuclear
ENSG00000166526	HPA003719	yes	moderate	75%-25%	nuclear	yes	negative	not set	not set	yes	strong	>75%	nuclear	yes	moderate	<25%	nuclear	yes	strong	>75%	nuclear	yes	strong	>75%	nuclear	yes	strong	>75%	nuclear	yes	strong	>75%	nuclear
ENSG00000104714	HPA003725	yes	strong	75%-25%	cytoplasmic	yes	moderate	75%-25%	cytoplasmic	yes	negative	not set	not set	yes	negative	not set	not set	yes	negative	not set	not set	yes	negative	not set	not set	yes	negative	not set	not set	yes	negative	not set	not set
ENSG00000159579	HPA003729	yes	moderate	>75%	cytoplasmic	yes	negative	not set	not set	yes	negative	not set	not set	yes	moderate	<25%	cytoplasmic	yes	negative	not set	not set	yes	negative	not set	not set	yes	moderate	75%-25%	cytoplasmic	yes	negative	not set	not set
ENSG00000197102	HPA003742	yes	negative	not set	not set	yes	moderate	<25%	cytoplasmic	yes	moderate	<25%	cytoplasmic	yes	negative	not set	not set	yes	negative	not set	not set	yes	negative	not set	not set	yes	negative	not set	not set	yes	strong	>75%	cytoplasmic
ENSG00000100106	HPA003747	yes	negative	not set	not set	yes	moderate	<25%	cytoplasmic	yes	negative	not set	not set	yes	negative	not set	not set	yes	negative	not set	not set	yes	negative	not set	not set	yes	weak	<25%	cytoplasmic	yes	negative	not set	not set
ENSG00000156709	CAB003764	yes	strong	>75%	cytoplasmic	yes	negative	not set	not set	yes	negative	not set	not set	yes	negative	not set	not set	yes	negative	not set	not set	yes	negative	not set	not set	yes	strong	>75%	cytoplasmic	yes	negative	not set	not set
ENSG00000142208	CAB003765	yes	weak	>75%	cytoplasmic	yes	negative	not set	not set	yes	negative	not set	not set	yes	negative	not set	not set	yes	negative	not set	not set	yes	negative	not set	not set	yes	strong	>75%	cytoplasmic,nuclear	yes	negative	not set	not set
ENSG00000115966	CAB003769	yes	moderate	>75%	nuclear	yes	negative	not set	not set	yes	negative	not set	not set	yes	negative	not set	not set	yes	negative	not set	not set	yes	negative	not set	not set	yes	moderate	>75%	nuclear	yes	negative	not set	not set
ENSG00000003400	CAB003780	yes	moderate	<25%	cytoplasmic	yes	negative	not set	not set	yes	weak	75%-25%	cytoplasmic	yes	negative	not set	not set	yes	negative	not set	not set	yes	negative	not set	not set	yes	negative	not set	not set	yes	strong	75%-25%	cytoplasmic
ENSG00000150768	CAB003782	yes	moderate	75%-25%	cytoplasmic	yes	moderate	>75%	cytoplasmic	yes	moderate	>75%	cytoplasmic	yes	negative	not set	not set	yes	moderate	>75%	cytoplasmic	yes	moderate	>75%	cytoplasmic	yes	negative	not set	not set	yes	strong	75%-25%	cytoplasmic
ENSG00000127884	CAB003783	yes	strong	>75%	cytoplasmic	yes	negative	not set	not set	yes	negative	not set	not set	yes	negative	not set	not set	yes	negative	not set	not set	yes	negative	not set	not set	yes	strong	>75%	cytoplasmic	yes	strong	>75%	cytoplasmic
ENSG00000170312	CAB003799	yes	negative	not set	not set	yes	negative	not set	not set	yes	strong	>75%		yes	negative	not set	not set	yes	strong	<25%		yes	negative	not set	not set	yes	negative	not set	not set	yes	strong	<25%
ENSG00000158402	CAB003800	yes	strong	>75%	nuclear	yes	negative	not set	not set	yes	strong	>75%	nuclear	yes	negative	not set	not set	yes	strong	>75%	nuclear	yes	strong	75%-25%	nuclear	yes	moderate	>75%	nuclear	yes	strong	>75%	nuclear
ENSG00000177606	CAB003801	yes	negative	not set	not set	yes	negative	not set	not set	yes	negative	not set	not set	yes	negative	not set	not set	yes	negative	not set	not set	yes	negative	not set	not set	yes	weak	<25%	nuclear	yes	negative	not set	not set
ENSG00000134057	CAB003804	yes	negative	not set	not set	yes	negative	not set	not set	yes	strong	75%-25%	cytoplasmic	yes	negative	not set	not set	yes	strong	<25%	cytoplasmic	yes	negative	not set	not set	yes	negative	not set	not set	yes	strong	<25%	cytoplasmic
ENSG00000126767	CAB003808	yes	moderate	<25%	nuclear	yes	negative	not set	not set	yes	negative	not set	not set	yes	moderate	rare	nuclear	yes	moderate	75%-25%	nuclear	yes	negative	not set	not set	yes	negative	not set	not set	yes	moderate	<25%	nuclear
ENSG00000176903	HPA003817	yes	moderate	75%-25%	cytoplasmic	yes	negative	not set	not set	yes	weak	<25%	nuclear	yes	negative	not set	not set	yes	negative	not set	not set	yes	negative	not set	not set	yes	moderate	<25%	cytoplasmic	yes	strong	<25%	nuclear
ENSG00000126934	CAB003835	yes	weak	75%-25%	cytoplasmic	yes	negative	not set	not set	yes	negative	not set	not set	yes	negative	not set	not set	yes	negative	not set	not set	yes	negative	not set	not set	yes	weak	>75%	cytoplasmic	yes	moderate	75%-25%	cytoplasmic
ENSG00000104320	CAB003836	yes	weak	75%-25%	cytoplasmic,nuclear	yes	negative	not set	not set	yes	negative	not set	not set	yes	negative	not set	not set	yes	negative	not set	not set	yes	negative	not set	not set	yes	negative	not set	not set	yes	moderate	>75%	cytoplasmic
ENSG00000143799	CAB003839	yes	moderate	<25%	cytoplasmic	yes	negative	not set	not set	yes	negative	not set	not set	yes	negative	not set	not set	yes	negative	not set	not set	yes	strong	<25%	cytoplasmic,nuclear	yes	negative	not set	not set	yes	moderate	<25%	nuclear
ENSG00000143799	CAB003840	yes	weak	<25%	nuclear	yes	negative	not set	not set	yes	moderate	>75%	nuclear	yes	negative	not set	not set	yes	strong	>75%	nuclear	yes	strong	75%-25%	nuclear	yes	moderate	>75%	nuclear	yes	strong	>75%	nuclear
ENSG00000089159	CAB003841	yes	moderate	75%-25%	cytoplasmic	yes	negative	not set	not set	yes	moderate	<25%	cytoplasmic	yes	negative	not set	not set	yes	negative	not set	not set	yes	negative	not set	not set	yes	moderate	>75%	cytoplasmic	yes	strong	75%-25%	cytoplasmic
ENSG00000113721	CAB003842	yes	negative	not set	not set	yes	negative	not set	not set	yes	moderate	<25%	nuclear	yes	strong	75%-25%	cytoplasmic	yes	negative	not set	not set	yes	negative	not set	not set	yes	negative	not set	not set	yes	moderate	<25%	nuclear
ENSG00000166501	CAB003843	yes	negative	not set	not set	yes	negative	not set	not set	yes	negative	not set	not set	yes	negative	not set	not set	yes	negative	not set	not set	yes	negative	not set	not set	yes	moderate	>75%	nuclear	yes	negative	not set	not set
ENSG00000178209	CAB003847	yes	negative	not set	not set	yes	negative	not set	not set	yes	negative	not set	not set	yes	negative	not set	not set	yes	negative	not set	not set	yes	negative	not set	not set	yes	moderate	75%-25%		yes	negative	not set	not set
ENSG00000184047	CAB003857	yes	strong	>75%	cytoplasmic	yes	negative	not set	not set	yes	negative	not set	not set	yes	negative	not set	not set	yes	negative	not set	not set	yes	negative	not set	not set	yes	moderate	>75%	cytoplasmic	yes	strong	75%-25%	cytoplasmic
ENSG00000116824	HPA003883	yes	negative	not set	not set	yes	negative	not set	not set	yes	weak	>75%	nuclear	yes	negative	not set	not set	yes	moderate	<25%	nuclear	yes	negative	not set	not set	yes	negative	not set	not set	yes	moderate	<25%	nuclear
ENSG00000164258	HPA003884	yes	moderate	>75%	cytoplasmic	yes	negative	not set	not set	yes	moderate	<25%	cytoplasmic	yes	negative	not set	not set	yes	negative	not set	not set	yes	weak	75%-25%	cytoplasmic	yes	moderate	75%-25%	cytoplasmic	yes	strong	75%-25%	cytoplasmic
ENSG00000166136	HPA003886	yes	strong	75%-25%	cytoplasmic	yes	negative	not set	not set	yes	negative	not set	not set	yes	negative	not set	not set	yes	negative	not set	not set	yes	negative	not set	not set	yes	negative	not set	not set	yes	strong	75%-25%	cytoplasmic
ENSG00000160710	HPA003890	yes	moderate	<25%	nuclear	yes	negative	not set	not set	yes	negative	not set	not set	yes	negative	not set	not set	yes	weak	<25%	nuclear	yes	negative	not set	not set	yes	strong	>75%	nuclear	yes	strong	<25%	nuclear
ENSG00000115255,ENSG00000129625	HPA003895	yes	strong	>75%	cytoplasmic	yes	negative	not set	not set	yes	negative	not set	not set	yes	moderate	75%-25%	cytoplasmic	yes	negative	not set	not set	yes	negative	not set	not set	yes	strong	>75%	cytoplasmic,membrane	yes	negative	not set	not set
ENSG00000155659	HPA003903	yes	weak	>75%	cytoplasmic	yes	negative	not set	not set	yes	strong	>75%	nuclear	yes	negative	not set	not set	yes	negative	not set	not set	yes	strong	>75%	nuclear	yes	negative	not set	not set	yes	weak	75%-25%	cytoplasmic
ENSG00000110693	HPA003908	yes	negative	not set	not set	yes	weak	75%-25%	nuclear	yes	negative	not set	not set	yes	negative	not set	not set	yes	negative	not set	not set	yes	strong	>75%	nuclear	yes	negative	not set	not set	yes	negative	not set	not set
ENSG00000166387	HPA003911	yes	moderate	<25%	cytoplasmic	yes	negative	not set	not set	yes	negative	not set	not set	yes	negative	not set	not set	yes	negative	not set	not set	yes	negative	not set	not set	yes	weak	75%-25%	cytoplasmic	yes	negative	not set	not set
ENSG00000073584	HPA003916	yes	weak	75%-25%	nuclear	yes	negative	not set	not set	yes	moderate	>75%	nuclear	yes	weak	75%-25%	nuclear	yes	moderate	>75%	nuclear	yes	weak	>75%	nuclear	yes	negative	not set	not set	yes	strong	75%-25%	nuclear
ENSG00000147119	HPA003919	yes	weak	>75%	cytoplasmic	yes	negative	not set	not set	yes	negative	not set	not set	yes	negative	not set	not set	yes	negative	not set	not set	yes	negative	not set	not set	yes	moderate	>75%	cytoplasmic	yes	negative	not set	not set
ENSG00000072401,ENSG00000078967,ENSG00000109332,ENSG00000131508	HPA003920	yes	moderate	>75%	cytoplasmic	yes	weak	>75%	cytoplasmic	yes	weak	75%-25%	cytoplasmic	yes	negative	not set	not set	yes	moderate	>75%	cytoplasmic	yes	weak	75%-25%	cytoplasmic	yes	weak	>75%	cytoplasmic	yes	moderate	>75%	cytoplasmic
ENSG00000105401	HPA003928	yes	negative	not set	not set	yes	moderate	<25%	cytoplasmic	yes	weak	<25%	nuclear	yes	negative	not set	not set	yes	negative	not set	not set	yes	weak	75%-25%	cytoplasmic	yes	moderate	75%-25%	cytoplasmic	yes	moderate	<25%	cytoplasmic
ENSG00000165169	HPA003938	yes	negative	not set	not set	yes	moderate	>75%	cytoplasmic	yes	negative	not set	not set	yes	negative	not set	not set	yes	negative	not set	not set	yes	moderate	75%-25%	cytoplasmic	yes	negative	not set	not set	yes	negative	not set	not set
ENSG00000167037	HPA003986	yes	moderate	>75%	cytoplasmic,membrane	yes	moderate	>75%	cytoplasmic,membrane	yes	moderate	75%-25%	cytoplasmic,membrane	yes	weak	75%-25%	cytoplasmic,membrane	yes	strong	>75%	cytoplasmic,membrane	yes	moderate	75%-25%	cytoplasmic,membrane	yes	moderate	>75%	cytoplasmic,membrane	yes	strong	>75%	cytoplasmic,membrane
ENSG00000156009	HPA003998	yes	strong	>75%	cytoplasmic,membrane	yes	negative	not set	not set	yes	strong	>75%	nuclear	yes	negative	not set	not set	yes	strong	>75%		yes	negative	not set	not set	yes	negative	not set	not set	yes	strong	>75%
ENSG00000187690	HPA004003	yes	negative	not set	not set	yes	negative	not set	not set	yes	negative	not set	not set	yes	negative	not set	not set	yes	negative	not set	not set	yes	negative	not set	not set	yes	negative	not set	not set	yes	moderate	75%-25%	nuclear
ENSG00000160789	CAB004022	yes	strong	75%-25%	cytoplasmic,membrane	yes	negative	not set	not set	yes	negative	not set	not set	yes	strong	>75%	nuclear	yes	negative	not set	not set	yes	moderate	75%-25%	cytoplasmic	yes	strong	>75%	cytoplasmic,membrane	yes	negative	not set	not set
ENSG00000101109	CAB004038	yes	negative	not set	not set	yes	negative	not set	not set	yes	moderate	<25%	cytoplasmic,nuclear	yes	negative	not set	not set	yes	moderate	<25%	nuclear	yes	moderate	<25%	nuclear	yes	negative	not set	not set	yes	moderate	<25%	cytoplasmic
ENSG00000100721	CAB004045	yes	negative	not set	not set	yes	moderate	>75%	cytoplasmic	yes	moderate	75%-25%	cytoplasmic	yes	negative	not set	not set	yes	negative	not set	not set	yes	moderate	>75%	cytoplasmic	yes	negative	not set	not set	yes	negative	not set	not set
ENSG00000115415	CAB004049	yes	negative	not set	not set	yes	moderate	75%-25%	nuclear	yes	negative	not set	not set	yes	negative	not set	not set	yes	negative	not set	not set	yes	strong	<25%	nuclear	yes	negative	not set	not set	yes	negative	not set	not set
ENSG00000126746	HPA004051	yes	weak	<25%	nuclear	yes	negative	not set	not set	yes	weak	<25%	nuclear	yes	moderate	<25%	nuclear	yes	negative	not set	not set	yes	weak	<25%	nuclear	yes	negative	not set	not set	yes	weak	<25%	nuclear
ENSG00000145907	HPA004052	yes	weak	>75%	cytoplasmic	yes	weak	75%-25%	cytoplasmic	yes	moderate	>75%	cytoplasmic	yes	negative	not set	not set	yes	moderate	>75%	cytoplasmic	yes	moderate	75%-25%	cytoplasmic	yes	weak	>75%	cytoplasmic	yes	strong	>75%	cytoplasmic
ENSG00000091136	HPA004056	yes	negative	not set	not set	yes	moderate	<25%	cytoplasmic	yes	negative	not set	not set	yes	negative	not set	not set	yes	negative	not set	not set	yes	moderate	75%-25%	nuclear	yes	weak	75%-25%	cytoplasmic	yes	negative	not set	not set
ENSG00000118689	CAB004074	yes	strong	75%-25%	nuclear	yes	negative	not set	not set	yes	weak	75%-25%	nuclear	yes	negative	not set	not set	yes	strong	>75%	nuclear	yes	weak	75%-25%	nuclear	yes	negative	not set	not set	yes	strong	>75%	nuclear
ENSG00000171862	CAB004076	yes	negative	not set	not set	yes	moderate	>75%	cytoplasmic,membrane	yes	moderate	>75%	cytoplasmic	yes	negative	not set	not set	yes	negative	not set	not set	yes	moderate	>75%	cytoplasmic	yes	negative	not set	not set	yes	negative	not set	not set
ENSG00000151247	CAB004077	yes	moderate	>75%	cytoplasmic	yes	strong	>75%	cytoplasmic	yes	moderate	75%-25%	nuclear	yes	negative	not set	not set	yes	moderate	75%-25%	nuclear	yes	negative	not set	not set	yes	moderate	>75%	cytoplasmic	yes	negative	not set	not set
ENSG00000020922	CAB004081	yes	strong	>75%	cytoplasmic	yes	negative	not set	not set	yes	moderate	<25%	nuclear	yes	moderate	75%-25%	nuclear	yes	moderate	<25%	nuclear	yes	negative	not set	not set	yes	negative	not set	not set	yes	strong	>75%	nuclear
ENSG00000067369	CAB004083	yes	strong	>75%	nuclear	yes	negative	not set	not set	yes	moderate	<25%	nuclear	yes	moderate	>75%	nuclear	yes	strong	75%-25%	nuclear	yes	negative	not set	not set	yes	negative	not set	not set	yes	strong	>75%	nuclear
ENSG00000159885	HPA004086	yes	moderate	<25%	nuclear	yes	negative	not set	not set	yes	negative	not set	not set	yes	negative	not set	not set	yes	negative	not set	not set	yes	negative	not set	not set	yes	moderate	75%-25%	nuclear	yes	negative	not set	not set
ENSG00000169946	HPA004094	yes	moderate	>75%	nuclear	yes	weak	75%-25%	cytoplasmic,membrane	yes	negative	not set	not set	yes	negative	not set	not set	yes	negative	not set	not set	yes	moderate	>75%	nuclear	yes	moderate	75%-25%	cytoplasmic,nuclear	yes	moderate	75%-25%	nuclear
ENSG00000066117	HPA004101	yes	weak	<25%	cytoplasmic,nuclear	yes	negative	not set	not set	yes	strong	75%-25%	nuclear	yes	negative	not set	not set	yes	strong	75%-25%	nuclear	yes	strong	>75%	nuclear	yes	moderate	>75%	nuclear	yes	strong	>75%	nuclear
ENSG00000260314	HPA004114	yes	negative	not set	not set	yes	moderate	<25%	cytoplasmic	yes	negative	not set	not set	yes	negative	not set	not set	yes	negative	not set	not set	yes	negative	not set	not set	yes	negative	not set	not set	yes	negative	not set	not set
ENSG00000179636	HPA004120	yes	negative	not set	not set	yes	strong	75%-25%	cytoplasmic	yes	negative	not set	not set	yes	negative	not set	not set	yes	negative	not set	not set	yes	negative	not set	not set	yes	negative	not set	not set	yes	negative	not set	not set
ENSG00000102974	HPA004122	yes	moderate	75%-25%	cytoplasmic,nuclear	yes	negative	not set	not set	yes	negative	not set	not set	yes	negative	not set	not set	yes	negative	not set	not set	yes	negative	not set	not set	yes	moderate	75%-25%	nuclear	yes	negative	not set	not set
ENSG00000131069	HPA004141	yes	moderate	>75%	cytoplasmic	yes	negative	not set	not set	yes	negative	not set	not set	yes	negative	not set	not set	yes	negative	not set	not set	yes	moderate	<25%	nuclear	yes	negative	not set	not set	yes	negative	not set	not set
ENSG00000185567	HPA004145	yes	moderate	<25%	nuclear	yes	negative	not set	not set	yes	negative	not set	not set	yes	moderate	<25%	cytoplasmic,nuclear	yes	strong	75%-25%	cytoplasmic,nuclear	yes	strong	75%-25%	cytoplasmic,nuclear	yes	weak	>75%	cytoplasmic,nuclear	yes	strong	>75%	cytoplasmic,nuclear
ENSG00000166337	HPA004148	yes	negative	not set	not set	yes	strong	>75%	cytoplasmic	yes	moderate	75%-25%	nuclear	yes	negative	not set	not set	yes	strong	75%-25%	nuclear	yes	moderate	75%-25%	nuclear	yes	moderate	>75%	cytoplasmic	yes	strong	75%-25%	nuclear
ENSG00000077092	HPA004174	yes	weak	<25%	nuclear	yes	negative	not set	not set	yes	strong	>75%	nuclear	yes	negative	not set	not set	yes	strong	>75%	nuclear	yes	strong	75%-25%	nuclear	yes	negative	not set	not set	yes	strong	>75%	nuclear
ENSG00000149925	HPA004177	yes	moderate	>75%	cytoplasmic	yes	moderate	75%-25%	cytoplasmic	yes	negative	not set	not set	yes	negative	not set	not set	yes	negative	not set	not set	yes	negative	not set	not set	yes	negative	not set	not set	yes	moderate	<25%	cytoplasmic
ENSG00000116288	HPA004190	yes	moderate	>75%	cytoplasmic	yes	negative	not set	not set	yes	negative	not set	not set	yes	negative	not set	not set	yes	negative	not set	not set	yes	moderate	<25%	nuclear	yes	negative	not set	not set	yes	strong	>75%	cytoplasmic,nuclear
ENSG00000142528	HPA004191	yes	moderate	>75%	cytoplasmic	yes	negative	not set	not set	yes	negative	not set	not set	yes	negative	not set	not set	yes	negative	not set	not set	yes	negative	not set	not set	yes	negative	not set	not set	yes	strong	<25%	cytoplasmic
ENSG00000126267	HPA004192	yes	negative	not set	not set	yes	moderate	>75%	cytoplasmic	yes	moderate	>75%	cytoplasmic	yes	negative	not set	not set	yes	moderate	75%-25%	cytoplasmic	yes	weak	75%-25%	cytoplasmic	yes	negative	not set	not set	yes	moderate	<25%	cytoplasmic
ENSG00000198646	HPA004198	yes	moderate	<25%	nuclear	yes	negative	not set	not set	yes	negative	not set	not set	yes	negative	not set	not set	yes	negative	not set	not set	yes	negative	not set	not set	yes	moderate	>75%	nuclear	yes	negative	not set	not set
ENSG00000071626	HPA004201	yes	weak	>75%	cytoplasmic	yes	strong	75%-25%	cytoplasmic	yes	strong	>75%	nuclear	yes	negative	not set	not set	yes	negative	not set	not set	yes	strong	>75%	nuclear	yes	negative	not set	not set	yes	moderate	75%-25%	nuclear
ENSG00000106006	HPA004203	yes	negative	not set	not set	yes	negative	not set	not set	yes	negative	not set	not set	yes	negative	not set	not set	yes	strong	75%-25%	nuclear	yes	negative	not set	not set	yes	strong	>75%	nuclear	yes	strong	75%-25%	nuclear
ENSG00000127616	CAB004208	yes	moderate	75%-25%	nuclear	yes	negative	not set	not set	yes	strong	>75%	nuclear	yes	negative	not set	not set	yes	strong	>75%	nuclear	yes	moderate	75%-25%	nuclear	yes	negative	not set	not set	yes	strong	>75%	nuclear
ENSG00000115053	CAB004210	yes	strong	>75%	nuclear	yes	negative	not set	not set	yes	strong	>75%	nuclear	yes	strong	>75%	nuclear	yes	strong	>75%	nuclear	yes	strong	>75%	nuclear	yes	strong	>75%	nuclear	yes	strong	>75%	nuclear
ENSG00000120837	CAB004211	yes	strong	>75%	nuclear	yes	negative	not set	not set	yes	strong	>75%	nuclear	yes	strong	>75%	nuclear	yes	strong	>75%	nuclear	yes	strong	>75%	nuclear	yes	strong	>75%	nuclear	yes	strong	>75%	nuclear
ENSG00000005339	CAB004212	yes	moderate	>75%	nuclear	yes	negative	not set	not set	yes	weak	<25%	nuclear	yes	strong	>75%	nuclear	yes	strong	>75%	nuclear	yes	negative	not set	not set	yes	moderate	>75%	nuclear	yes	strong	>75%	nuclear
ENSG00000136807	CAB004216	yes	strong	<25%	nuclear	yes	negative	not set	not set	yes	negative	not set	not set	yes	moderate	<25%	nuclear	yes	strong	75%-25%	nuclear	yes	negative	not set	not set	yes	strong	75%-25%	nuclear	yes	strong	>75%	nuclear
ENSG00000172115	CAB004222	yes	moderate	>75%	cytoplasmic	yes	negative	not set	not set	yes	strong	<25%	cytoplasmic	yes	negative	not set	not set	yes	negative	not set	not set	yes	strong	<25%	cytoplasmic	yes	moderate	75%-25%	cytoplasmic	yes	strong	75%-25%	cytoplasmic
ENSG00000100664	CAB004226	yes	strong	>75%	cytoplasmic	yes	negative	not set	not set	yes	strong	75%-25%	cytoplasmic	yes	negative	not set	not set	yes	negative	not set	not set	yes	strong	75%-25%	cytoplasmic	yes	negative	not set	not set	yes	strong	<25%	cytoplasmic
ENSG00000182944	CAB004230	yes	strong	>75%	nuclear	yes	negative	not set	not set	yes	strong	>75%	nuclear	yes	strong	>75%	nuclear	yes	strong	>75%	nuclear	yes	strong	>75%	nuclear	yes	strong	>75%	nuclear	yes	strong	>75%	nuclear
ENSG00000068078	CAB004231	yes	negative	not set	not set	yes	negative	not set	not set	yes	negative	not set	not set	yes	negative	not set	not set	yes	negative	not set	not set	yes	negative	not set	not set	yes	negative	not set	not set	yes	moderate	>75%	membrane
ENSG00000094631	CAB004236	yes	weak	>75%	cytoplasmic	yes	negative	not set	not set	yes	strong	>75%	cytoplasmic,membrane	yes	negative	not set	not set	yes	negative	not set	not set	yes	moderate	75%-25%	cytoplasmic,membrane	yes	weak	75%-25%	cytoplasmic	yes	moderate	<25%	cytoplasmic
ENSG00000185122	CAB004239	yes	strong	75%-25%	nuclear	yes	negative	not set	not set	yes	negative	not set	not set	yes	negative	not set	not set	yes	negative	not set	not set	yes	moderate	75%-25%	nuclear	yes	strong	75%-25%	nuclear	yes	negative	not set	not set
ENSG00000121022	CAB004242	yes	moderate	>75%	cytoplasmic,nuclear	yes	negative	not set	not set	yes	strong	>75%	nuclear	yes	strong	>75%	nuclear	yes	strong	>75%	nuclear	yes	strong	>75%	nuclear	yes	strong	75%-25%	cytoplasmic,nuclear	yes	strong	>75%	nuclear
ENSG00000196419	CAB004254	yes	strong	75%-25%	nuclear	yes	negative	not set	not set	yes	strong	>75%	nuclear	yes	strong	>75%	nuclear	yes	strong	>75%	nuclear	yes	strong	75%-25%	nuclear	yes	strong	>75%	nuclear	yes	strong	>75%	nuclear
ENSG00000185896	CAB004260	yes	strong	>75%	cytoplasmic	yes	negative	not set	not set	yes	strong	75%-25%	cytoplasmic	yes	negative	not set	not set	yes	negative	not set	not set	yes	negative	not set	not set	yes	strong	>75%	cytoplasmic	yes	strong	75%-25%	cytoplasmic
ENSG00000076984	CAB004262	yes	weak	75%-25%	cytoplasmic	yes	negative	not set	not set	yes	negative	not set	not set	yes	negative	not set	not set	yes	negative	not set	not set	yes	negative	not set	not set	yes	negative	not set	not set	yes	strong	>75%	nuclear
ENSG00000173039	CAB004264	yes	moderate	<25%	cytoplasmic	yes	negative	not set	not set	yes	negative	not set	not set	yes	negative	not set	not set	yes	negative	not set	not set	yes	negative	not set	not set	yes	moderate	>75%	cytoplasmic	yes	strong	<25%	cytoplasmic
ENSG00000116030	CAB004269	yes	weak	<25%	cytoplasmic,nuclear	yes	negative	not set	not set	yes	moderate	<25%	nuclear	yes	negative	not set	not set	yes	negative	not set	not set	yes	strong	>75%	nuclear	yes	weak	>75%	nuclear	yes	strong	75%-25%	nuclear
ENSG00000089685	CAB004270	yes	moderate	<25%	cytoplasmic	yes	negative	not set	not set	yes	strong	>75%	nuclear	yes	negative	not set	not set	yes	strong	75%-25%	nuclear	yes	strong	>75%	nuclear	yes	negative	not set	not set	yes	weak	<25%	nuclear
ENSG00000140992	CAB004272	yes	moderate	75%-25%	cytoplasmic	yes	strong	>75%	cytoplasmic	yes	strong	75%-25%	cytoplasmic	yes	negative	not set	not set	yes	strong	>75%	cytoplasmic	yes	moderate	>75%	cytoplasmic	yes	weak	>75%	cytoplasmic	yes	strong	>75%	cytoplasmic
ENSG00000160199	CAB004285	yes	negative	not set	not set	yes	negative	not set	not set	yes	negative	not set	not set	yes	strong	<25%	nuclear	yes	negative	not set	not set	yes	negative	not set	not set	yes	negative	not set	not set	yes	strong	<25%	nuclear
ENSG00000100401	CAB004293	yes	strong	75%-25%	cytoplasmic,membrane	yes	negative	not set	not set	yes	negative	not set	not set	yes	moderate	<25%	nuclear	yes	negative	not set	not set	yes	negative	not set	not set	yes	strong	>75%	cytoplasmic,membrane	yes	moderate	<25%	cytoplasmic
ENSG00000100823	CAB004294	yes	strong	>75%	nuclear	yes	negative	not set	not set	yes	negative	not set	not set	yes	moderate	>75%	cytoplasmic	yes	strong	>75%	nuclear	yes	negative	not set	not set	yes	negative	not set	not set	yes	strong	>75%	nuclear
ENSG00000173757	CAB004298	yes	strong	>75%		yes	moderate	>75%	cytoplasmic,membrane	yes	negative	not set	not set	yes	moderate	>75%	nuclear	yes	negative	not set	not set	yes	negative	not set	not set	yes	negative	not set	not set	yes	negative	not set	not set
ENSG00000182718	CAB004311	yes	negative	not set	not set	yes	negative	not set	not set	yes	negative	not set	not set	yes	moderate	75%-25%	cytoplasmic	yes	negative	not set	not set	yes	negative	not set	not set	yes	moderate	75%-25%	cytoplasmic	yes	negative	not set	not set
ENSG00000143437	CAB004318	yes	moderate	75%-25%	nuclear	yes	negative	not set	not set	yes	negative	not set	not set	yes	negative	not set	not set	yes	negative	not set	not set	yes	negative	not set	not set	yes	moderate	>75%	nuclear	yes	moderate	75%-25%	nuclear
ENSG00000139613	CAB004321	yes	strong	>75%	nuclear	yes	negative	not set	not set	yes	weak	>75%	nuclear	yes	negative	not set	not set	yes	negative	not set	not set	yes	negative	not set	not set	yes	strong	>75%	nuclear	yes	negative	not set	not set
ENSG00000163930	CAB004322	yes	moderate	>75%	cytoplasmic	yes	negative	not set	not set	yes	negative	not set	not set	yes	negative	not set	not set	yes	negative	not set	not set	yes	negative	not set	not set	yes	negative	not set	not set	yes	moderate	75%-25%	nuclear
ENSG00000197323	HPA004345	yes	weak	>75%	nuclear	yes	negative	not set	not set	yes	negative	not set	not set	yes	negative	not set	not set	yes	negative	not set	not set	yes	strong	75%-25%	nuclear	yes	moderate	>75%	nuclear	yes	negative	not set	not set
ENSG00000152495	CAB004347	yes	weak	75%-25%	cytoplasmic	yes	weak	>75%	cytoplasmic,membrane	yes	negative	not set	not set	yes	negative	not set	not set	yes	negative	not set	not set	yes	weak	75%-25%	nuclear	yes	negative	not set	not set	yes	negative	not set	not set
ENSG00000110395	CAB004350	yes	weak	>75%	cytoplasmic	yes	weak	75%-25%	cytoplasmic	yes	moderate	75%-25%	cytoplasmic	yes	negative	not set	not set	yes	weak	>75%	cytoplasmic	yes	weak	>75%	cytoplasmic	yes	negative	not set	not set	yes	strong	>75%	cytoplasmic
ENSG00000105810	CAB004363	yes	moderate	>75%	cytoplasmic,membrane	yes	negative	not set	not set	yes	negative	not set	not set	yes	negative	not set	not set	yes	moderate	>75%	cytoplasmic,membrane	yes	negative	not set	not set	yes	negative	not set	not set	yes	moderate	>75%	cytoplasmic,membrane
ENSG00000127948	CAB004372	yes	strong	>75%	cytoplasmic	yes	negative	not set	not set	yes	negative	not set	not set	yes	moderate	75%-25%	cytoplasmic	yes	negative	not set	not set	yes	negative	not set	not set	yes	moderate	>75%	cytoplasmic	yes	strong	75%-25%	cytoplasmic
ENSG00000062822	CAB004375	yes	moderate	<25%	nuclear	yes	negative	not set	not set	yes	strong	75%-25%	nuclear	yes	negative	not set	not set	yes	strong	75%-25%	nuclear	yes	strong	75%-25%	nuclear	yes	negative	not set	not set	yes	strong	>75%	nuclear
ENSG00000150760	CAB004378	yes	negative	not set	not set	yes	negative	not set	not set	yes	negative	not set	not set	yes	negative	not set	not set	yes	negative	not set	not set	yes	negative	not set	not set	yes	negative	not set	not set	yes	moderate	<25%	cytoplasmic
ENSG00000171723	CAB004419	yes	moderate	>75%	cytoplasmic	yes	negative	not set	not set	yes	moderate	>75%	cytoplasmic	yes	negative	not set	not set	yes	moderate	>75%	cytoplasmic	yes	moderate	>75%	cytoplasmic	yes	moderate	>75%	cytoplasmic	yes	moderate	>75%	cytoplasmic
ENSG00000197746	HPA004426	yes	strong	>75%	cytoplasmic	yes	moderate	>75%	cytoplasmic	yes	strong	75%-25%	nuclear	yes	negative	not set	not set	yes	negative	not set	not set	yes	moderate	>75%	nuclear	yes	strong	>75%	cytoplasmic	yes	negative	not set	not set
ENSG00000075239	HPA004428	yes	strong	>75%	cytoplasmic	yes	negative	not set	not set	yes	strong	<25%	cytoplasmic	yes	negative	not set	not set	yes	negative	not set	not set	yes	negative	not set	not set	yes	strong	>75%	cytoplasmic	yes	negative	not set	not set
ENSG00000165119	CAB004435	yes	moderate	>75%	cytoplasmic	yes	negative	not set	not set	yes	strong	75%-25%	nuclear	yes	strong	>75%	nuclear	yes	strong	75%-25%	nuclear	yes	strong	>75%	nuclear	yes	strong	>75%	nuclear	yes	strong	>75%	nuclear
ENSG00000126945	CAB004436	yes	strong	>75%	nuclear	yes	negative	not set	not set	yes	strong	>75%	nuclear	yes	strong	>75%	nuclear	yes	strong	>75%	nuclear	yes	strong	>75%	nuclear	yes	strong	>75%	nuclear	yes	strong	>75%	nuclear
ENSG00000149257	CAB004441	yes	strong	75%-25%	cytoplasmic	yes	negative	not set	not set	yes	negative	not set	not set	yes	negative	not set	not set	yes	negative	not set	not set	yes	negative	not set	not set	yes	moderate	>75%	cytoplasmic	yes	negative	not set	not set
ENSG00000162374	CAB004442	yes	negative	not set	not set	yes	negative	not set	not set	yes	negative	not set	not set	yes	negative	not set	not set	yes	negative	not set	not set	yes	negative	not set	not set	yes	negative	not set	not set	yes	strong	>75%	nuclear
ENSG00000184216	CAB004461	yes	moderate	<25%	cytoplasmic	yes	negative	not set	not set	yes	negative	not set	not set	yes	negative	not set	not set	yes	negative	not set	not set	yes	negative	not set	not set	yes	moderate	>75%	cytoplasmic	yes	negative	not set	not set
ENSG00000079246	CAB004468	yes	moderate	>75%	nuclear	yes	negative	not set	not set	yes	strong	>75%	nuclear	yes	moderate	>75%	nuclear	yes	moderate	>75%	nuclear	yes	strong	>75%	nuclear	yes	moderate	>75%	nuclear	yes	strong	>75%	nuclear
ENSG00000157404	HPA004471	yes	weak	<25%	cytoplasmic	yes	negative	not set	not set	yes	moderate	75%-25%	cytoplasmic,membrane	yes	negative	not set	not set	yes	negative	not set	not set	yes	negative	not set	not set	yes	negative	not set	not set	yes	negative	not set	not set
ENSG00000274211	HPA004475	yes	negative	not set	not set	yes	negative	not set	not set	yes	negative	not set	not set	yes	negative	not set	not set	yes	negative	not set	not set	yes	negative	not set	not set	yes	strong	>75%	membrane,nuclear	yes	negative	not set	not set
ENSG00000141385	HPA004479	yes	moderate	75%-25%	cytoplasmic	yes	moderate	>75%	cytoplasmic,nuclear	yes	strong	75%-25%	nuclear	yes	negative	not set	not set	yes	strong	<25%	nuclear	yes	strong	<25%	nuclear	yes	weak	75%-25%	cytoplasmic	yes	moderate	75%-25%	nuclear
ENSG00000141385	HPA004480	yes	strong	>75%	cytoplasmic	yes	moderate	>75%	cytoplasmic	yes	strong	75%-25%	cytoplasmic	yes	negative	not set	not set	yes	strong	>75%	cytoplasmic	yes	moderate	>75%	cytoplasmic	yes	strong	>75%	cytoplasmic	yes	strong	>75%	cytoplasmic
ENSG00000070018	CAB004490	yes	weak	<25%	cytoplasmic	yes	negative	not set	not set	yes	moderate	<25%	cytoplasmic	yes	negative	not set	not set	yes	negative	not set	not set	yes	weak	<25%	nuclear	yes	negative	not set	not set	yes	moderate	75%-25%	cytoplasmic
ENSG00000119969	CAB004491	yes	negative	not set	not set	yes	negative	not set	not set	yes	negative	not set	not set	yes	negative	not set	not set	yes	strong	>75%	nuclear	yes	negative	not set	not set	yes	negative	not set	not set	yes	negative	not set	not set
ENSG00000172175	CAB004494	yes	negative	not set	not set	yes	negative	not set	not set	yes	negative	not set	not set	yes	negative	not set	not set	yes	negative	not set	not set	yes	negative	not set	not set	yes	negative	not set	not set	yes	moderate	75%-25%	cytoplasmic
ENSG00000104738	CAB004497	yes	moderate	<25%	nuclear	yes	negative	not set	not set	yes	strong	75%-25%	nuclear	yes	negative	not set	not set	yes	strong	<25%	nuclear	yes	moderate	>75%	nuclear	yes	negative	not set	not set	yes	strong	<25%	nuclear
ENSG00000095015	CAB004500	yes	strong	>75%	cytoplasmic	yes	negative	not set	not set	yes	negative	not set	not set	yes	negative	not set	not set	yes	negative	not set	not set	yes	negative	not set	not set	yes	negative	not set	not set	yes	strong	>75%	cytoplasmic
ENSG00000169375	CAB004506	yes	negative	not set	not set	yes	negative	not set	not set	yes	negative	not set	not set	yes	negative	not set	not set	yes	strong	75%-25%	nuclear	yes	negative	not set	not set	yes	negative	not set	not set	yes	strong	75%-25%	nuclear
ENSG00000166886	CAB004510	yes	negative	not set	not set	yes	negative	not set	not set	yes	negative	not set	not set	yes	negative	not set	not set	yes	negative	not set	not set	yes	negative	not set	not set	yes	moderate	75%-25%	nuclear	yes	negative	not set	not set
ENSG00000117399	CAB004525	yes	negative	not set	not set	yes	negative	not set	not set	yes	strong	>75%	cytoplasmic,nuclear	yes	negative	not set	not set	yes	weak	<25%	cytoplasmic,nuclear	yes	negative	not set	not set	yes	negative	not set	not set	yes	strong	75%-25%	cytoplasmic,nuclear
ENSG00000165059	CAB004530	yes	weak	>75%	cytoplasmic	yes	strong	>75%	cytoplasmic	yes	moderate	75%-25%	cytoplasmic	yes	negative	not set	not set	yes	negative	not set	not set	yes	strong	75%-25%	cytoplasmic	yes	moderate	>75%	cytoplasmic	yes	negative	not set	not set
ENSG00000172531	CAB004545	yes	negative	not set	not set	yes	negative	not set	not set	yes	negative	not set	not set	yes	negative	not set	not set	yes	negative	not set	not set	yes	negative	not set	not set	yes	negative	not set	not set	yes	moderate	75%-25%	nuclear
ENSG00000089022	CAB004546	yes	weak	>75%	cytoplasmic	yes	negative	not set	not set	yes	negative	not set	not set	yes	negative	not set	not set	yes	negative	not set	not set	yes	negative	not set	not set	yes	negative	not set	not set	yes	moderate	75%-25%	cytoplasmic,nuclear
ENSG00000070495	CAB004548	yes	strong	>75%	nuclear	yes	negative	not set	not set	yes	strong	>75%	nuclear	yes	negative	not set	not set	yes	moderate	75%-25%	nuclear	yes	strong	<25%	nuclear	yes	moderate	75%-25%	nuclear	yes	strong	>75%	nuclear
ENSG00000163918	CAB004557	yes	weak	<25%	nuclear	yes	negative	not set	not set	yes	strong	>75%	nuclear	yes	negative	not set	not set	yes	moderate	75%-25%	nuclear	yes	negative	not set	not set	yes	negative	not set	not set	yes	strong	>75%	nuclear
ENSG00000132383	CAB004563	yes	negative	not set	not set	yes	negative	not set	not set	yes	negative	not set	not set	yes	negative	not set	not set	yes	negative	not set	not set	yes	negative	not set	not set	yes	negative	not set	not set	yes	strong	75%-25%	nuclear
ENSG00000186350	CAB004565	yes	strong	>75%	nuclear	yes	negative	not set	not set	yes	moderate	>75%	nuclear	yes	strong	75%-25%	nuclear	yes	moderate	75%-25%	nuclear	yes	moderate	75%-25%	nuclear	yes	moderate	75%-25%	nuclear	yes	moderate	75%-25%	nuclear
ENSG00000068903	CAB004573	yes	weak	<25%	cytoplasmic	yes	negative	not set	not set	yes	negative	not set	not set	yes	negative	not set	not set	yes	negative	not set	not set	yes	negative	not set	not set	yes	negative	not set	not set	yes	strong	75%-25%	nuclear
ENSG00000172845	CAB004580	yes	negative	not set	not set	yes	negative	not set	not set	yes	negative	not set	not set	yes	negative	not set	not set	yes	moderate	<25%	nuclear	yes	negative	not set	not set	yes	negative	not set	not set	yes	moderate	<25%	nuclear
ENSG00000161011	CAB004587	yes	strong	75%-25%	nuclear	yes	negative	not set	not set	yes	negative	not set	not set	yes	negative	not set	not set	yes	negative	not set	not set	yes	negative	not set	not set	yes	weak	75%-25%	cytoplasmic	yes	negative	not set	not set
ENSG00000077097	CAB004601	yes	moderate	<25%	nuclear	yes	negative	not set	not set	yes	strong	<25%	nuclear	yes	moderate	75%-25%	nuclear	yes	strong	<25%	nuclear	yes	negative	not set	not set	yes	moderate	75%-25%	nuclear	yes	negative	not set	not set
ENSG00000198400	CAB004606	yes	moderate	>75%	cytoplasmic	yes	moderate	>75%	cytoplasmic	yes	moderate	75%-25%	cytoplasmic	yes	negative	not set	not set	yes	negative	not set	not set	yes	moderate	>75%	cytoplasmic	yes	negative	not set	not set	yes	negative	not set	not set
ENSG00000131462	CAB004608	yes	moderate	>75%	cytoplasmic	yes	negative	not set	not set	yes	strong	>75%	cytoplasmic	yes	negative	not set	not set	yes	strong	75%-25%	cytoplasmic	yes	strong	75%-25%	cytoplasmic	yes	negative	not set	not set	yes	strong	>75%	cytoplasmic
ENSG00000108312	CAB004611	yes	strong	>75%	nuclear	yes	negative	not set	not set	yes	negative	not set	not set	yes	negative	not set	not set	yes	negative	not set	not set	yes	negative	not set	not set	yes	strong	>75%	nuclear	yes	strong	<25%	nuclear
ENSG00000125753	CAB004612	yes	strong	>75%	cytoplasmic	yes	negative	not set	not set	yes	negative	not set	not set	yes	negative	not set	not set	yes	negative	not set	not set	yes	negative	not set	not set	yes	strong	>75%	cytoplasmic	yes	moderate	75%-25%	cytoplasmic
ENSG00000136888	CAB004615	yes	strong	>75%	cytoplasmic	yes	moderate	>75%	cytoplasmic	yes	negative	not set	not set	yes	negative	not set	not set	yes	negative	not set	not set	yes	moderate	>75%	cytoplasmic	yes	moderate	>75%	cytoplasmic	yes	moderate	>75%	cytoplasmic
ENSG00000166483	CAB004619	yes	negative	not set	not set	yes	negative	not set	not set	yes	negative	not set	not set	yes	negative	not set	not set	yes	strong	75%-25%	nuclear	yes	negative	not set	not set	yes	negative	not set	not set	yes	strong	<25%	nuclear
ENSG00000155495	HPA004622	yes	negative	not set	not set	yes	negative	not set	not set	yes	weak	<25%	cytoplasmic	yes	negative	not set	not set	yes	moderate	>75%	cytoplasmic	yes	negative	not set	not set	yes	negative	not set	not set	yes	strong	>75%	cytoplasmic
ENSG00000071626	HPA004631	yes	negative	not set	not set	yes	moderate	75%-25%	cytoplasmic	yes	moderate	>75%	nuclear	yes	negative	not set	not set	yes	moderate	<25%	nuclear	yes	strong	>75%	nuclear	yes	negative	not set	not set	yes	strong	75%-25%	nuclear
ENSG00000112902	HPA004632	yes	moderate	75%-25%	cytoplasmic	yes	negative	not set	not set	yes	negative	not set	not set	yes	negative	not set	not set	yes	negative	not set	not set	yes	negative	not set	not set	yes	negative	not set	not set	yes	negative	not set	not set
ENSG00000148120	HPA004633	yes	moderate	75%-25%	cytoplasmic	yes	negative	not set	not set	yes	negative	not set	not set	yes	negative	not set	not set	yes	negative	not set	not set	yes	negative	not set	not set	yes	negative	not set	not set	yes	moderate	75%-25%	cytoplasmic
ENSG00000110768	CAB004637	yes	strong	>75%	nuclear	yes	strong	>75%	nuclear	yes	strong	>75%	nuclear	yes	negative	not set	not set	yes	strong	>75%	nuclear	yes	strong	>75%	nuclear	yes	strong	>75%	nuclear	yes	strong	>75%	nuclear
ENSG00000111716	CAB004641	yes	moderate	>75%	cytoplasmic	yes	negative	not set	not set	yes	negative	not set	not set	yes	negative	not set	not set	yes	negative	not set	not set	yes	negative	not set	not set	yes	moderate	>75%	cytoplasmic	yes	moderate	<25%	cytoplasmic
ENSG00000138385	CAB004643	yes	strong	>75%	nuclear	yes	negative	not set	not set	yes	strong	>75%	nuclear	yes	moderate	75%-25%	nuclear	yes	strong	>75%	nuclear	yes	strong	>75%	nuclear	yes	strong	>75%	nuclear	yes	strong	>75%	nuclear
ENSG00000159423	CAB004645	yes	strong	75%-25%	nuclear	yes	negative	not set	not set	yes	negative	not set	not set	yes	negative	not set	not set	yes	negative	not set	not set	yes	negative	not set	not set	yes	negative	not set	not set	yes	strong	>75%	cytoplasmic
ENSG00000197746	CAB004647	yes	strong	>75%	cytoplasmic	yes	negative	not set	not set	yes	strong	<25%	nuclear	yes	negative	not set	not set	yes	moderate	75%-25%	nuclear	yes	strong	75%-25%	nuclear	yes	moderate	>75%	cytoplasmic	yes	negative	not set	not set
ENSG00000158769	CAB004671	yes	strong	>75%	cytoplasmic,membrane	yes	negative	not set	not set	yes	strong	>75%	cytoplasmic	yes	negative	not set	not set	yes	moderate	75%-25%	cytoplasmic	yes	strong	75%-25%	cytoplasmic	yes	negative	not set	not set	yes	moderate	75%-25%	nuclear
ENSG00000101811	CAB004680	yes	strong	>75%	nuclear	yes	negative	not set	not set	yes	strong	75%-25%	nuclear	yes	negative	not set	not set	yes	strong	75%-25%	nuclear	yes	strong	75%-25%	nuclear	yes	moderate	>75%	nuclear	yes	strong	>75%	nuclear
ENSG00000172315	CAB004688	yes	strong	75%-25%	nuclear	yes	moderate	>75%	cytoplasmic	yes	strong	75%-25%	cytoplasmic,nuclear	yes	moderate	<25%	nuclear	yes	strong	75%-25%	nuclear	yes	strong	>75%	cytoplasmic,nuclear	yes	strong	75%-25%	nuclear	yes	strong	75%-25%	nuclear
ENSG00000178105	HPA004691	yes	weak	75%-25%	cytoplasmic,membrane	yes	strong	>75%	cytoplasmic,membrane	yes	strong	>75%	cytoplasmic,membrane	yes	negative	not set	not set	yes	negative	not set	not set	yes	strong	>75%	cytoplasmic,membrane	yes	weak	>75%	cytoplasmic,membrane	yes	negative	not set	not set
ENSG00000006756	HPA004694	yes	strong	>75%	cytoplasmic	yes	strong	75%-25%	cytoplasmic	yes	strong	<25%	cytoplasmic	yes	negative	not set	not set	yes	moderate	<25%	cytoplasmic	yes	strong	75%-25%	cytoplasmic	yes	moderate	<25%	cytoplasmic	yes	strong	<25%	cytoplasmic
ENSG00000186376	HPA004705	yes	moderate	>75%	nuclear	yes	negative	not set	not set	yes	moderate	75%-25%	nuclear	yes	negative	not set	not set	yes	strong	>75%	nuclear	yes	moderate	75%-25%	nuclear	yes	moderate	>75%		yes	strong	>75%	nuclear
ENSG00000068796	HPA004716	yes	negative	not set	not set	yes	negative	not set	not set	yes	moderate	>75%	nuclear	yes	negative	not set	not set	yes	moderate	<25%	nuclear	yes	moderate	>75%	nuclear	yes	negative	not set	not set	yes	moderate	<25%	nuclear
ENSG00000117305	HPA004727	yes	moderate	75%-25%	cytoplasmic	yes	negative	not set	not set	yes	moderate	75%-25%	cytoplasmic	yes	negative	not set	not set	yes	moderate	75%-25%	cytoplasmic	yes	negative	not set	not set	yes	negative	not set	not set	yes	moderate	75%-25%	cytoplasmic
ENSG00000125780,ENSG00000286022	HPA004728	yes	weak	75%-25%	cytoplasmic,membrane	yes	moderate	75%-25%	cytoplasmic,membrane	yes	negative	not set	not set	yes	negative	not set	not set	yes	moderate	75%-25%		yes	negative	not set	not set	yes	negative	not set	not set	yes	moderate	75%-25%
ENSG00000127022	CAB004738	yes	strong	75%-25%	cytoplasmic	yes	negative	not set	not set	yes	strong	>75%	cytoplasmic,membrane	yes	negative	not set	not set	yes	negative	not set	not set	yes	negative	not set	not set	yes	weak	75%-25%	cytoplasmic	yes	negative	not set	not set
ENSG00000136068	HPA004747	yes	strong	>75%	cytoplasmic	yes	negative	not set	not set	yes	negative	not set	not set	yes	negative	not set	not set	yes	negative	not set	not set	yes	negative	not set	not set	yes	strong	>75%	cytoplasmic	yes	negative	not set	not set
ENSG00000137076	HPA004748	yes	moderate	>75%	cytoplasmic	yes	negative	not set	not set	yes	moderate	>75%	cytoplasmic	yes	negative	not set	not set	yes	negative	not set	not set	yes	negative	not set	not set	yes	moderate	>75%	cytoplasmic	yes	negative	not set	not set
ENSG00000064300	HPA004765	yes	negative	not set	not set	yes	negative	not set	not set	yes	negative	not set	not set	yes	strong	>75%	cytoplasmic	yes	moderate	<25%	nuclear	yes	negative	not set	not set	yes	moderate	<25%	nuclear	yes	negative	not set	not set
ENSG00000105127	HPA004776	yes	strong	>75%	nuclear	yes	negative	not set	not set	yes	moderate	>75%	nuclear	yes	strong	75%-25%	nuclear	yes	strong	75%-25%	nuclear	yes	strong	<25%	nuclear	yes	strong	>75%	nuclear	yes	strong	>75%	nuclear
ENSG00000112118	HPA004790	yes	negative	not set	not set	yes	negative	not set	not set	yes	negative	not set	not set	yes	negative	not set	not set	yes	strong	75%-25%	nuclear	yes	negative	not set	not set	yes	negative	not set	not set	yes	strong	<25%	nuclear
ENSG00000116017	HPA004793	yes	negative	not set	not set	yes	negative	not set	not set	yes	negative	not set	not set	yes	negative	not set	not set	yes	negative	not set	not set	yes	moderate	>75%	nuclear	yes	negative	not set	not set	yes	negative	not set	not set
ENSG00000117036	HPA004794	yes	moderate	75%-25%	nuclear	yes	negative	not set	not set	yes	negative	not set	not set	yes	negative	not set	not set	yes	negative	not set	not set	yes	negative	not set	not set	yes	moderate	<25%	cytoplasmic	yes	strong	<25%	nuclear
ENSG00000116604	HPA004807	yes	strong	75%-25%	nuclear	yes	negative	not set	not set	yes	negative	not set	not set	yes	moderate	75%-25%	nuclear	yes	moderate	75%-25%	nuclear	yes	weak	<25%	nuclear	yes	negative	not set	not set	yes	strong	75%-25%	nuclear
ENSG00000125492	HPA004809	yes	negative	not set	not set	yes	negative	not set	not set	yes	weak	75%-25%	nuclear	yes	negative	not set	not set	yes	negative	not set	not set	yes	weak	75%-25%	nuclear	yes	negative	not set	not set	yes	negative	not set	not set
ENSG00000075426	HPA004817	yes	negative	not set	not set	yes	negative	not set	not set	yes	negative	not set	not set	yes	negative	not set	not set	yes	strong	<25%	cytoplasmic	yes	negative	not set	not set	yes	moderate	75%-25%	cytoplasmic	yes	negative	not set	not set
ENSG00000076003	HPA004818	yes	negative	not set	not set	yes	negative	not set	not set	yes	strong	75%-25%	nuclear	yes	negative	not set	not set	yes	strong	75%-25%	nuclear	yes	moderate	75%-25%	nuclear	yes	negative	not set	not set	yes	strong	75%-25%	nuclear
ENSG00000058056	HPA004827	yes	moderate	75%-25%	cytoplasmic	yes	negative	not set	not set	yes	negative	not set	not set	yes	negative	not set	not set	yes	strong	<25%	nuclear	yes	negative	not set	not set	yes	strong	75%-25%	cytoplasmic,nuclear	yes	negative	not set	not set
ENSG00000130528	HPA004833	yes	negative	not set	not set	yes	negative	not set	not set	yes	negative	not set	not set	yes	negative	not set	not set	yes	negative	not set	not set	yes	weak	75%-25%	nuclear	yes	negative	not set	not set	yes	moderate	>75%	cytoplasmic,membrane
ENSG00000121022	HPA004845	yes	strong	>75%	cytoplasmic	yes	negative	not set	not set	yes	negative	not set	not set	yes	negative	not set	not set	yes	moderate	75%-25%	nuclear	yes	strong	75%-25%	nuclear	yes	moderate	>75%	cytoplasmic	yes	strong	75%-25%	cytoplasmic,nuclear
ENSG00000007264	HPA004847	yes	moderate	75%-25%	cytoplasmic	yes	negative	not set	not set	yes	negative	not set	not set	yes	negative	not set	not set	yes	negative	not set	not set	yes	negative	not set	not set	yes	weak	75%-25%	cytoplasmic	yes	strong	<25%	nuclear
ENSG00000122359	CAB004851	yes	moderate	75%-25%	membrane	yes	moderate	75%-25%	cytoplasmic,membrane	yes	negative	not set	not set	yes	negative	not set	not set	yes	negative	not set	not set	yes	negative	not set	not set	yes	moderate	75%-25%	cytoplasmic,membrane	yes	moderate	75%-25%	cytoplasmic,nuclear
ENSG00000138448	HPA004856	yes	moderate	75%-25%	cytoplasmic,membrane,nuclear	yes	moderate	>75%	cytoplasmic	yes	negative	not set	not set	yes	negative	not set	not set	yes	strong	>75%	nuclear	yes	negative	not set	not set	yes	weak	>75%	cytoplasmic	yes	negative	not set	not set
ENSG00000122035	HPA004859	yes	moderate	75%-25%	nuclear	yes	strong	>75%	nuclear	yes	moderate	75%-25%	nuclear	yes	negative	not set	not set	yes	strong	75%-25%	nuclear	yes	moderate	75%-25%	nuclear	yes	negative	not set	not set	yes	strong	75%-25%	nuclear
ENSG00000213930	HPA004868	yes	weak	75%-25%	cytoplasmic	yes	moderate	75%-25%	nuclear	yes	weak	75%-25%	nuclear	yes	negative	not set	not set	yes	strong	<25%	nuclear	yes	moderate	75%-25%	nuclear	yes	negative	not set	not set	yes	strong	>75%	nuclear
ENSG00000104738	HPA004873	yes	strong	>75%	cytoplasmic	yes	negative	not set	not set	yes	strong	75%-25%	nuclear	yes	negative	not set	not set	yes	negative	not set	not set	yes	moderate	75%-25%	nuclear	yes	negative	not set	not set	yes	strong	75%-25%	nuclear
ENSG00000090339	HPA004877	yes	negative	not set	not set	yes	negative	not set	not set	yes	moderate	75%-25%	cytoplasmic	yes	negative	not set	not set	yes	negative	not set	not set	yes	moderate	>75%	cytoplasmic	yes	negative	not set	not set	yes	negative	not set	not set
ENSG00000104177	HPA004883	yes	moderate	>75%	nuclear	yes	negative	not set	not set	yes	strong	>75%	nuclear	yes	weak	<25%	nuclear	yes	strong	>75%	nuclear	yes	strong	>75%	nuclear	yes	strong	>75%	nuclear	yes	strong	>75%	nuclear
ENSG00000129315	HPA004892	yes	moderate	75%-25%	nuclear	yes	negative	not set	not set	yes	negative	not set	not set	yes	negative	not set	not set	yes	negative	not set	not set	yes	moderate	75%-25%	nuclear	yes	moderate	>75%	nuclear	yes	negative	not set	not set
ENSG00000113916	HPA004899	yes	negative	not set	not set	yes	negative	not set	not set	yes	strong	>75%	nuclear	yes	negative	not set	not set	yes	strong	<25%	nuclear	yes	strong	75%-25%	nuclear	yes	negative	not set	not set	yes	negative	not set	not set
ENSG00000122565	HPA004902	yes	negative	not set	not set	yes	negative	not set	not set	yes	strong	>75%	nuclear	yes	negative	not set	not set	yes	strong	75%-25%	nuclear	yes	strong	<25%	nuclear	yes	negative	not set	not set	yes	strong	>75%	nuclear
ENSG00000166527	HPA004906	yes	moderate	75%-25%	cytoplasmic	yes	negative	not set	not set	yes	negative	not set	not set	yes	negative	not set	not set	yes	negative	not set	not set	yes	negative	not set	not set	yes	negative	not set	not set	yes	moderate	<25%	cytoplasmic
ENSG00000138668	HPA004911	yes	negative	not set	not set	yes	negative	not set	not set	yes	strong	>75%	cytoplasmic,membrane	yes	negative	not set	not set	yes	strong	>75%	nuclear	yes	strong	75%-25%	nuclear	yes	negative	not set	not set	yes	strong	>75%	nuclear
ENSG00000131504	HPA004916	yes	negative	not set	not set	yes	weak	75%-25%	cytoplasmic,nuclear	yes	negative	not set	not set	yes	negative	not set	not set	yes	strong	75%-25%		yes	weak	75%-25%	cytoplasmic,nuclear	yes	negative	not set	not set	yes	strong	>75%
ENSG00000161905	CAB004963	yes	moderate	<25%	cytoplasmic	yes	moderate	<25%	cytoplasmic,membrane	yes	negative	not set	not set	yes	negative	not set	not set	yes	negative	not set	not set	yes	strong	75%-25%	nuclear	yes	negative	not set	not set	yes	negative	not set	not set
ENSG00000041357	CAB004973	yes	weak	<25%	cytoplasmic,nuclear	yes	weak	75%-25%	cytoplasmic	yes	negative	not set	not set	yes	negative	not set	not set	yes	negative	not set	not set	yes	negative	not set	not set	yes	moderate	<25%	nuclear	yes	negative	not set	not set
ENSG00000013375	CAB004998	yes	negative	not set	not set	yes	negative	not set	not set	yes	moderate	<25%	nuclear	yes	negative	not set	not set	yes	negative	not set	not set	yes	strong	<25%	nuclear	yes	negative	not set	not set	yes	moderate	75%-25%	cytoplasmic,nuclear
ENSG00000134138	CAB004999	yes	moderate	<25%	nuclear	yes	negative	not set	not set	yes	negative	not set	not set	yes	moderate	>75%	nuclear	yes	negative	not set	not set	yes	negative	not set	not set	yes	negative	not set	not set	yes	negative	not set	not set
ENSG00000169371	CAB005004	yes	negative	not set	not set	yes	moderate	>75%	cytoplasmic	yes	moderate	75%-25%	cytoplasmic	yes	negative	not set	not set	yes	strong	>75%	cytoplasmic	yes	strong	>75%	cytoplasmic	yes	negative	not set	not set	yes	strong	>75%	cytoplasmic
ENSG00000030110	CAB005029	yes	moderate	75%-25%	cytoplasmic	yes	negative	not set	not set	yes	negative	not set	not set	yes	negative	not set	not set	yes	negative	not set	not set	yes	negative	not set	not set	yes	moderate	75%-25%	cytoplasmic	yes	negative	not set	not set
ENSG00000187840	CAB005032	yes	moderate	<25%	cytoplasmic	yes	negative	not set	not set	yes	negative	not set	not set	yes	negative	not set	not set	yes	negative	not set	not set	yes	negative	not set	not set	yes	negative	not set	not set	yes	negative	not set	not set
ENSG00000137055	CAB005035	yes	negative	not set	not set	yes	negative	not set	not set	yes	negative	not set	not set	yes	negative	not set	not set	yes	strong	>75%	cytoplasmic,nuclear	yes	negative	not set	not set	yes	negative	not set	not set	yes	strong	>75%	cytoplasmic,nuclear
ENSG00000167641	CAB005044	yes	negative	not set	not set	yes	negative	not set	not set	yes	negative	not set	not set	yes	moderate	75%-25%	cytoplasmic	yes	negative	not set	not set	yes	negative	not set	not set	yes	strong	<25%	cytoplasmic	yes	negative	not set	not set
ENSG00000196591	CAB005054	yes	moderate	>75%	nuclear	yes	negative	not set	not set	yes	strong	>75%	nuclear	yes	moderate	<25%	nuclear	yes	moderate	>75%	nuclear	yes	moderate	75%-25%	nuclear	yes	moderate	75%-25%	nuclear	yes	strong	>75%	nuclear
ENSG00000111725	CAB005058	yes	moderate	>75%	cytoplasmic	yes	moderate	75%-25%	cytoplasmic	yes	moderate	75%-25%	cytoplasmic	yes	negative	not set	not set	yes	negative	not set	not set	yes	strong	>75%	cytoplasmic,nuclear	yes	moderate	>75%	cytoplasmic	yes	negative	not set	not set
ENSG00000158092	CAB005063	yes	strong	>75%	cytoplasmic,membrane	yes	negative	not set	not set	yes	strong	>75%	cytoplasmic,membrane	yes	negative	not set	not set	yes	negative	not set	not set	yes	strong	>75%	cytoplasmic,membrane	yes	moderate	75%-25%	cytoplasmic,membrane	yes	strong	>75%	cytoplasmic,membrane
ENSG00000106546	CAB005072	yes	weak	75%-25%	cytoplasmic	yes	negative	not set	not set	yes	negative	not set	not set	yes	negative	not set	not set	yes	negative	not set	not set	yes	negative	not set	not set	yes	negative	not set	not set	yes	strong	<25%	nuclear
ENSG00000164144	CAB005080	yes	moderate	>75%	cytoplasmic	yes	moderate	>75%	cytoplasmic	yes	moderate	>75%	cytoplasmic	yes	negative	not set	not set	yes	negative	not set	not set	yes	moderate	>75%	cytoplasmic	yes	weak	>75%	cytoplasmic	yes	negative	not set	not set
ENSG00000136573	CAB005093	yes	weak	<25%	cytoplasmic	yes	negative	not set	not set	yes	negative	not set	not set	yes	negative	not set	not set	yes	negative	not set	not set	yes	weak	75%-25%	nuclear	yes	negative	not set	not set	yes	negative	not set	not set
ENSG00000092067	CAB005113	yes	weak	75%-25%	cytoplasmic,membrane	yes	negative	not set	not set	yes	negative	not set	not set	yes	negative	not set	not set	yes	moderate	75%-25%		yes	negative	not set	not set	yes	negative	not set	not set	yes	moderate	75%-25%
ENSG00000107968	CAB005120	yes	strong	>75%	cytoplasmic	yes	negative	not set	not set	yes	negative	not set	not set	yes	negative	not set	not set	yes	negative	not set	not set	yes	negative	not set	not set	yes	strong	>75%	cytoplasmic	yes	strong	75%-25%	cytoplasmic
ENSG00000253729	CAB005167	yes	moderate	<25%	nuclear	yes	negative	not set	not set	yes	strong	>75%	nuclear	yes	moderate	<25%	nuclear	yes	strong	>75%	nuclear	yes	strong	>75%	nuclear	yes	strong	>75%	nuclear	yes	strong	>75%	nuclear
ENSG00000101336	CAB005195	yes	weak	75%-25%	cytoplasmic	yes	negative	not set	not set	yes	moderate	>75%	cytoplasmic,membrane	yes	negative	not set	not set	yes	negative	not set	not set	yes	moderate	75%-25%	cytoplasmic,membrane	yes	negative	not set	not set	yes	negative	not set	not set
ENSG00000113013	CAB005219	yes	strong	>75%	cytoplasmic	yes	negative	not set	not set	yes	strong	<25%	cytoplasmic	yes	negative	not set	not set	yes	strong	<25%	cytoplasmic	yes	strong	>75%	cytoplasmic	yes	moderate	75%-25%	cytoplasmic	yes	strong	75%-25%	cytoplasmic
ENSG00000044574	CAB005221	yes	moderate	75%-25%	cytoplasmic	yes	moderate	>75%	cytoplasmic	yes	moderate	<25%	cytoplasmic	yes	negative	not set	not set	yes	negative	not set	not set	yes	moderate	<25%	cytoplasmic	yes	weak	>75%	cytoplasmic	yes	negative	not set	not set
ENSG00000092199	CAB005223	yes	strong	75%-25%	nuclear	yes	negative	not set	not set	yes	strong	>75%	nuclear	yes	moderate	75%-25%	nuclear	yes	strong	75%-25%	nuclear	yes	strong	75%-25%	nuclear	yes	moderate	>75%	nuclear	yes	strong	>75%	nuclear
ENSG00000141738	CAB005226	yes	moderate	<25%	cytoplasmic	yes	negative	not set	not set	yes	negative	not set	not set	yes	negative	not set	not set	yes	negative	not set	not set	yes	negative	not set	not set	yes	moderate	>75%	cytoplasmic,membrane	yes	negative	not set	not set
ENSG00000096384	CAB005230	yes	moderate	75%-25%	cytoplasmic	yes	weak	75%-25%	cytoplasmic	yes	negative	not set	not set	yes	negative	not set	not set	yes	negative	not set	not set	yes	negative	not set	not set	yes	moderate	>75%	cytoplasmic	yes	strong	75%-25%	cytoplasmic
ENSG00000140350	CAB005231	yes	strong	>75%	nuclear	yes	negative	not set	not set	yes	negative	not set	not set	yes	negative	not set	not set	yes	negative	not set	not set	yes	negative	not set	not set	yes	strong	>75%	nuclear	yes	strong	75%-25%	nuclear
ENSG00000113368	CAB005269	yes	strong	75%-25%	nuclear	yes	negative	not set	not set	yes	negative	not set	not set	yes	negative	not set	not set	yes	strong	>75%	nuclear	yes	strong	75%-25%	nuclear	yes	negative	not set	not set	yes	strong	>75%	nuclear
ENSG00000149480	CAB005315	yes	moderate	75%-25%	cytoplasmic,nuclear	yes	negative	not set	not set	yes	strong	>75%	nuclear	yes	negative	not set	not set	yes	strong	>75%	nuclear	yes	strong	>75%	nuclear	yes	strong	>75%	nuclear	yes	strong	>75%	nuclear
ENSG00000121774	CAB005355	yes	strong	>75%	nuclear	yes	negative	not set	not set	yes	strong	>75%	nuclear	yes	strong	>75%	nuclear	yes	strong	>75%	nuclear	yes	strong	>75%	nuclear	yes	strong	>75%	nuclear	yes	strong	>75%	nuclear
ENSG00000085231	CAB005361	yes	negative	not set	not set	yes	negative	not set	not set	yes	negative	not set	not set	yes	negative	not set	not set	yes	negative	not set	not set	yes	negative	not set	not set	yes	strong	>75%	nuclear	yes	negative	not set	not set
ENSG00000186575	CAB005385	yes	moderate	75%-25%	cytoplasmic	yes	negative	not set	not set	yes	strong	75%-25%	cytoplasmic,membrane	yes	negative	not set	not set	yes	negative	not set	not set	yes	moderate	<25%	cytoplasmic	yes	negative	not set	not set	yes	strong	75%-25%	cytoplasmic
ENSG00000115310	CAB005388	yes	weak	>75%	cytoplasmic,membrane	yes	strong	>75%	cytoplasmic,membrane	yes	strong	75%-25%	cytoplasmic,membrane	yes	negative	not set	not set	yes	negative	not set	not set	yes	strong	>75%	cytoplasmic,membrane	yes	negative	not set	not set	yes	negative	not set	not set
ENSG00000170365	CAB005389	yes	moderate	<25%	cytoplasmic	yes	negative	not set	not set	yes	weak	<25%	nuclear	yes	negative	not set	not set	yes	negative	not set	not set	yes	weak	<25%	nuclear	yes	negative	not set	not set	yes	moderate	>75%	nuclear
ENSG00000112658	CAB005416	yes	moderate	75%-25%	cytoplasmic,nuclear	yes	negative	not set	not set	yes	moderate	<25%	nuclear	yes	negative	not set	not set	yes	negative	not set	not set	yes	negative	not set	not set	yes	strong	>75%	nuclear	yes	negative	not set	not set
ENSG00000132024	HPA005436	yes	moderate	>75%	cytoplasmic	yes	moderate	>75%	cytoplasmic	yes	moderate	>75%	cytoplasmic	yes	negative	not set	not set	yes	moderate	>75%	cytoplasmic	yes	moderate	>75%	cytoplasmic	yes	weak	>75%	cytoplasmic	yes	moderate	75%-25%	cytoplasmic
ENSG00000064886	HPA005443	yes	moderate	75%-25%	cytoplasmic	yes	negative	not set	not set	yes	negative	not set	not set	yes	negative	not set	not set	yes	negative	not set	not set	yes	negative	not set	not set	yes	weak	<25%	cytoplasmic	yes	negative	not set	not set
ENSG00000152942	HPA005448	yes	negative	not set	not set	yes	negative	not set	not set	yes	strong	75%-25%	nuclear	yes	negative	not set	not set	yes	strong	>75%	nuclear	yes	strong	>75%	nuclear	yes	negative	not set	not set	yes	strong	<25%	nuclear
ENSG00000142583	HPA005449	yes	negative	not set	not set	yes	strong	>75%	cytoplasmic,membrane	yes	strong	>75%	cytoplasmic,membrane	yes	negative	not set	not set	yes	negative	not set	not set	yes	strong	>75%	cytoplasmic,membrane	yes	negative	not set	not set	yes	negative	not set	not set
ENSG00000117713	HPA005456	yes	negative	not set	not set	yes	negative	not set	not set	yes	negative	not set	not set	yes	negative	not set	not set	yes	negative	not set	not set	yes	negative	not set	not set	yes	moderate	75%-25%	nuclear	yes	negative	not set	not set
ENSG00000248905	HPA005465	yes	negative	not set	not set	yes	negative	not set	not set	yes	negative	not set	not set	yes	negative	not set	not set	yes	negative	not set	not set	yes	negative	not set	not set	yes	moderate	>75%	cytoplasmic	yes	negative	not set	not set
ENSG00000132382	HPA005466	yes	moderate	>75%	nuclear	yes	negative	not set	not set	yes	negative	not set	not set	yes	negative	not set	not set	yes	negative	not set	not set	yes	negative	not set	not set	yes	moderate	75%-25%	nuclear	yes	negative	not set	not set
ENSG00000104763	HPA005468	yes	strong	75%-25%	cytoplasmic	yes	negative	not set	not set	yes	negative	not set	not set	yes	negative	not set	not set	yes	negative	not set	not set	yes	negative	not set	not set	yes	moderate	75%-25%	cytoplasmic	yes	negative	not set	not set
ENSG00000136492	HPA005474	yes	moderate	75%-25%	nuclear	yes	negative	not set	not set	yes	strong	>75%	membrane,nuclear	yes	negative	not set	not set	yes	moderate	75%-25%	nuclear	yes	strong	>75%	nuclear	yes	strong	>75%	membrane,nuclear	yes	strong	>75%	nuclear
ENSG00000162298	HPA005480	yes	strong	75%-25%	cytoplasmic	yes	negative	not set	not set	yes	strong	75%-25%	cytoplasmic,membrane	yes	negative	not set	not set	yes	negative	not set	not set	yes	negative	not set	not set	yes	strong	>75%	cytoplasmic	yes	negative	not set	not set
ENSG00000111252	HPA005483	yes	weak	<25%	cytoplasmic	yes	negative	not set	not set	yes	strong	75%-25%	nuclear	yes	negative	not set	not set	yes	negative	not set	not set	yes	negative	not set	not set	yes	weak	>75%	cytoplasmic	yes	negative	not set	not set
ENSG00000088325	HPA005487	yes	weak	<25%	cytoplasmic	yes	negative	not set	not set	yes	moderate	<25%	nuclear	yes	negative	not set	not set	yes	moderate	<25%	nuclear	yes	moderate	<25%	nuclear	yes	negative	not set	not set	yes	negative	not set	not set
ENSG00000064703	HPA005516	yes	negative	not set	not set	yes	negative	not set	not set	yes	negative	not set	not set	yes	negative	not set	not set	yes	negative	not set	not set	yes	moderate	75%-25%	cytoplasmic	yes	negative	not set	not set	yes	negative	not set	not set
ENSG00000106571	HPA005534	yes	weak	75%-25%	nuclear	yes	negative	not set	not set	yes	strong	<25%	nuclear	yes	negative	not set	not set	yes	strong	75%-25%	nuclear	yes	strong	75%-25%	nuclear	yes	negative	not set	not set	yes	strong	75%-25%	nuclear
ENSG00000126709	HPA005543	yes	moderate	75%-25%	cytoplasmic	yes	weak	rare	cytoplasmic	yes	moderate	rare	cytoplasmic	yes	negative	not set	not set	yes	negative	not set	not set	yes	negative	not set	not set	yes	negative	not set	not set	yes	negative	not set	not set
ENSG00000182979	HPA005544	yes	strong	>75%		yes	negative	not set	not set	yes	moderate	>75%	nuclear	yes	negative	not set	not set	yes	strong	>75%	nuclear	yes	strong	75%-25%	nuclear	yes	negative	not set	not set	yes	strong	>75%	nuclear
ENSG00000126787	HPA005546	yes	weak	<25%	cytoplasmic	yes	moderate	>75%	cytoplasmic,membrane	yes	strong	>75%	cytoplasmic,membrane	yes	negative	not set	not set	yes	strong	75%-25%	cytoplasmic,membrane	yes	strong	>75%	cytoplasmic,membrane	yes	negative	not set	not set	yes	strong	75%-25%	cytoplasmic,membrane
ENSG00000068366	HPA005552	yes	weak	75%-25%	cytoplasmic	yes	negative	not set	not set	yes	negative	not set	not set	yes	negative	not set	not set	yes	negative	not set	not set	yes	negative	not set	not set	yes	negative	not set	not set	yes	negative	not set	not set
ENSG00000100299	HPA005554	yes	strong	>75%	cytoplasmic	yes	negative	not set	not set	yes	negative	not set	not set	yes	negative	not set	not set	yes	negative	not set	not set	yes	negative	not set	not set	yes	moderate	<25%	cytoplasmic	yes	negative	not set	not set
ENSG00000082258	HPA005559	yes	strong	>75%	cytoplasmic	yes	negative	not set	not set	yes	negative	not set	not set	yes	negative	not set	not set	yes	moderate	75%-25%	nuclear	yes	negative	not set	not set	yes	strong	>75%	nuclear	yes	strong	75%-25%	nuclear
ENSG00000145020	HPA005566	yes	weak	>75%	cytoplasmic	yes	negative	not set	not set	yes	negative	not set	not set	yes	negative	not set	not set	yes	negative	not set	not set	yes	negative	not set	not set	yes	negative	not set	not set	yes	strong	>75%	cytoplasmic
ENSG00000140105	HPA005573	yes	weak	<25%	cytoplasmic	yes	moderate	>75%	cytoplasmic,membrane	yes	negative	not set	not set	yes	negative	not set	not set	yes	negative	not set	not set	yes	weak	75%-25%	cytoplasmic	yes	negative	not set	not set	yes	negative	not set	not set
ENSG00000171720	CAB005583	yes	weak	<25%	nuclear	yes	negative	not set	not set	yes	negative	not set	not set	yes	negative	not set	not set	yes	negative	not set	not set	yes	negative	not set	not set	yes	moderate	>75%	nuclear	yes	negative	not set	not set
ENSG00000173726	CAB005585	yes	strong	>75%	cytoplasmic	yes	moderate	<25%	cytoplasmic	yes	strong	75%-25%	cytoplasmic	yes	negative	not set	not set	yes	strong	75%-25%	cytoplasmic	yes	moderate	>75%	cytoplasmic	yes	moderate	>75%	cytoplasmic	yes	strong	>75%	cytoplasmic
ENSG00000005206	CAB005592	yes	moderate	>75%	cytoplasmic	yes	negative	not set	not set	yes	negative	not set	not set	yes	negative	not set	not set	yes	negative	not set	not set	yes	negative	not set	not set	yes	moderate	75%-25%	membrane	yes	negative	not set	not set
ENSG00000165280	CAB005593	yes	weak	75%-25%	cytoplasmic	yes	negative	not set	not set	yes	strong	<25%	nuclear	yes	negative	not set	not set	yes	strong	<25%	nuclear	yes	strong	>75%	nuclear	yes	negative	not set	not set	yes	moderate	>75%	nuclear
ENSG00000070961	CAB005605	yes	weak	75%-25%	cytoplasmic	yes	negative	not set	not set	yes	negative	not set	not set	yes	negative	not set	not set	yes	negative	not set	not set	yes	negative	not set	not set	yes	weak	75%-25%	cytoplasmic	yes	negative	not set	not set
ENSG00000000457	HPA005624	yes	negative	not set	not set	yes	moderate	75%-25%	cytoplasmic	yes	negative	not set	not set	yes	negative	not set	not set	yes	moderate	<25%	cytoplasmic	yes	negative	not set	not set	yes	weak	75%-25%	cytoplasmic	yes	moderate	<25%	cytoplasmic
ENSG00000179348	HPA005633	yes	negative	not set	not set	yes	negative	not set	not set	yes	negative	not set	not set	yes	negative	not set	not set	yes	negative	not set	not set	yes	strong	75%-25%	nuclear	yes	negative	not set	not set	yes	strong	<25%	nuclear
ENSG00000204103	HPA005653	yes	weak	<25%	cytoplasmic,membrane	yes	negative	not set	not set	yes	strong	>75%	nuclear	yes	negative	not set	not set	yes	strong	>75%	nuclear	yes	strong	>75%	nuclear	yes	weak	>75%	cytoplasmic,membrane	yes	strong	>75%	nuclear
ENSG00000125304	HPA005657	yes	moderate	>75%	cytoplasmic,membrane	yes	moderate	>75%	nuclear	yes	strong	>75%	cytoplasmic	yes	negative	not set	not set	yes	moderate	>75%	cytoplasmic	yes	strong	>75%	cytoplasmic	yes	negative	not set	not set	yes	moderate	>75%	cytoplasmic
ENSG00000132109	HPA005673	yes	moderate	75%-25%	cytoplasmic	yes	negative	not set	not set	yes	negative	not set	not set	yes	negative	not set	not set	yes	negative	not set	not set	yes	negative	not set	not set	yes	negative	not set	not set	yes	moderate	<25%	nuclear
ENSG00000011426	HPA005680	yes	negative	not set	not set	yes	negative	not set	not set	yes	strong	>75%	nuclear	yes	negative	not set	not set	yes	negative	not set	not set	yes	negative	not set	not set	yes	negative	not set	not set	yes	negative	not set	not set
ENSG00000060749	HPA005682	yes	weak	>75%	cytoplasmic	yes	negative	not set	not set	yes	weak	75%-25%	cytoplasmic	yes	negative	not set	not set	yes	strong	<25%	nuclear	yes	negative	not set	not set	yes	weak	75%-25%	cytoplasmic	yes	strong	<25%	cytoplasmic,nuclear
ENSG00000148396	HPA005684	yes	weak	75%-25%	cytoplasmic	yes	negative	not set	not set	yes	moderate	>75%	cytoplasmic	yes	negative	not set	not set	yes	negative	not set	not set	yes	moderate	>75%	cytoplasmic	yes	negative	not set	not set	yes	negative	not set	not set
ENSG00000126947	HPA005685	yes	moderate	>75%	cytoplasmic	yes	moderate	>75%	cytoplasmic,membrane	yes	negative	not set	not set	yes	negative	not set	not set	yes	negative	not set	not set	yes	negative	not set	not set	yes	negative	not set	not set	yes	negative	not set	not set
ENSG00000091513	HPA005692	yes	moderate	<25%	cytoplasmic,membrane	yes	negative	not set	not set	yes	moderate	<25%	nuclear	yes	negative	not set	not set	yes	moderate	<25%	nuclear	yes	moderate	<25%	nuclear	yes	negative	not set	not set	yes	moderate	<25%	nuclear
ENSG00000188636	HPA005697	yes	moderate	75%-25%	cytoplasmic	yes	strong	75%-25%	cytoplasmic	yes	strong	75%-25%	nuclear	yes	negative	not set	not set	yes	negative	not set	not set	yes	strong	>75%	nuclear	yes	negative	not set	not set	yes	negative	not set	not set
ENSG00000124145	HPA005716	yes	weak	>75%	cytoplasmic	yes	strong	75%-25%	cytoplasmic	yes	negative	not set	not set	yes	negative	not set	not set	yes	negative	not set	not set	yes	strong	75%-25%	nuclear	yes	moderate	75%-25%	cytoplasmic	yes	negative	not set	not set
ENSG00000075618	HPA005723	yes	negative	not set	not set	yes	negative	not set	not set	yes	negative	not set	not set	yes	negative	not set	not set	yes	negative	not set	not set	yes	negative	not set	not set	yes	strong	>75%	cytoplasmic	yes	negative	not set	not set
ENSG00000125753	HPA005724	yes	weak	>75%	cytoplasmic	yes	moderate	>75%	cytoplasmic	yes	weak	>75%	cytoplasmic	yes	negative	not set	not set	yes	weak	>75%	cytoplasmic	yes	weak	>75%	cytoplasmic	yes	strong	>75%	cytoplasmic	yes	weak	>75%	cytoplasmic
ENSG00000168970,ENSG00000243789	HPA005726	yes	strong	>75%	cytoplasmic	yes	negative	not set	not set	yes	negative	not set	not set	yes	negative	not set	not set	yes	negative	not set	not set	yes	moderate	>75%	cytoplasmic	yes	weak	>75%	cytoplasmic	yes	moderate	>75%	cytoplasmic
ENSG00000143416	HPA005741	yes	moderate	>75%	cytoplasmic	yes	negative	not set	not set	yes	negative	not set	not set	yes	negative	not set	not set	yes	negative	not set	not set	yes	negative	not set	not set	yes	moderate	<25%	cytoplasmic	yes	negative	not set	not set
ENSG00000078403	HPA005747	yes	negative	not set	not set	yes	negative	not set	not set	yes	strong	75%-25%	nuclear	yes	negative	not set	not set	yes	negative	not set	not set	yes	strong	75%-25%	nuclear	yes	negative	not set	not set	yes	negative	not set	not set
ENSG00000106299	HPA005750	yes	moderate	>75%	cytoplasmic	yes	negative	not set	not set	yes	negative	not set	not set	yes	moderate	75%-25%	cytoplasmic	yes	negative	not set	not set	yes	negative	not set	not set	yes	strong	>75%	cytoplasmic	yes	negative	not set	not set
ENSG00000117461,ENSG00000278139	HPA005751	yes	weak	>75%	cytoplasmic,membrane	yes	weak	75%-25%	cytoplasmic	yes	strong	>75%	cytoplasmic,membrane	yes	negative	not set	not set	yes	strong	>75%	cytoplasmic,membrane	yes	strong	>75%	cytoplasmic,membrane	yes	weak	75%-25%	cytoplasmic,membrane	yes	strong	>75%	cytoplasmic,membrane
ENSG00000168078	HPA005753	yes	negative	not set	not set	yes	negative	not set	not set	yes	strong	75%-25%	cytoplasmic,nuclear	yes	negative	not set	not set	yes	negative	not set	not set	yes	strong	75%-25%	cytoplasmic,nuclear	yes	negative	not set	not set	yes	negative	not set	not set
ENSG00000175832	HPA005768	yes	moderate	>75%	nuclear	yes	negative	not set	not set	yes	negative	not set	not set	yes	negative	not set	not set	yes	negative	not set	not set	yes	negative	not set	not set	yes	moderate	>75%	nuclear	yes	strong	75%-25%	nuclear
ENSG00000144712	HPA005777	yes	negative	not set	not set	yes	weak	>75%	cytoplasmic	yes	negative	not set	not set	yes	negative	not set	not set	yes	moderate	<25%	nuclear	yes	negative	not set	not set	yes	weak	>75%	cytoplasmic	yes	moderate	<25%	nuclear
ENSG00000116809	HPA005789	yes	moderate	75%-25%	nuclear	yes	strong	>75%	cytoplasmic	yes	moderate	75%-25%	cytoplasmic	yes	negative	not set	not set	yes	strong	>75%	cytoplasmic	yes	strong	>75%	cytoplasmic	yes	negative	not set	not set	yes	strong	>75%	cytoplasmic
ENSG00000134317	HPA005798	yes	strong	<25%	cytoplasmic,membrane	yes	negative	not set	not set	yes	negative	not set	not set	yes	negative	not set	not set	yes	negative	not set	not set	yes	negative	not set	not set	yes	strong	<25%	cytoplasmic,membrane	yes	negative	not set	not set
ENSG00000116731	HPA005809	yes	weak	<25%	cytoplasmic	yes	negative	not set	not set	yes	negative	not set	not set	yes	negative	not set	not set	yes	negative	not set	not set	yes	moderate	<25%	nuclear	yes	negative	not set	not set	yes	moderate	75%-25%	nuclear
ENSG00000104823	HPA005835	yes	strong	>75%	cytoplasmic	yes	negative	not set	not set	yes	moderate	<25%	cytoplasmic,membrane	yes	negative	not set	not set	yes	negative	not set	not set	yes	negative	not set	not set	yes	negative	not set	not set	yes	moderate	<25%	cytoplasmic
ENSG00000102189	CAB005861	yes	weak	>75%	cytoplasmic	yes	negative	not set	not set	yes	negative	not set	not set	yes	negative	not set	not set	yes	negative	not set	not set	yes	strong	75%-25%	nuclear	yes	moderate	75%-25%	cytoplasmic	yes	strong	<25%	nuclear
ENSG00000178999	CAB005862	yes	weak	>75%	cytoplasmic	yes	negative	not set	not set	yes	negative	not set	not set	yes	negative	not set	not set	yes	negative	not set	not set	yes	negative	not set	not set	yes	negative	not set	not set	yes	moderate	<25%	nuclear
ENSG00000108654	CAB005868	yes	moderate	75%-25%	nuclear	yes	negative	not set	not set	yes	negative	not set	not set	yes	negative	not set	not set	yes	strong	<25%	nuclear	yes	negative	not set	not set	yes	weak	75%-25%	cytoplasmic	yes	strong	>75%	nuclear
ENSG00000189403	CAB005873	yes	moderate	75%-25%	nuclear	yes	negative	not set	not set	yes	negative	not set	not set	yes	negative	not set	not set	yes	moderate	<25%	nuclear	yes	strong	>75%	nuclear	yes	moderate	>75%	nuclear	yes	moderate	75%-25%	nuclear
ENSG00000130816	CAB005876	yes	negative	not set	not set	yes	negative	not set	not set	yes	negative	not set	not set	yes	negative	not set	not set	yes	negative	not set	not set	yes	negative	not set	not set	yes	negative	not set	not set	yes	strong	75%-25%	nuclear
ENSG00000124216	CAB005883	yes	strong	>75%	nuclear	yes	negative	not set	not set	yes	negative	not set	not set	yes	negative	not set	not set	yes	strong	75%-25%	nuclear	yes	negative	not set	not set	yes	strong	>75%	nuclear	yes	strong	>75%	nuclear
ENSG00000004487	CAB005884	yes	weak	<25%	nuclear	yes	negative	not set	not set	yes	negative	not set	not set	yes	negative	not set	not set	yes	moderate	75%-25%	nuclear	yes	negative	not set	not set	yes	negative	not set	not set	yes	moderate	75%-25%	nuclear
ENSG00000132688	CAB005889	yes	strong	75%-25%	nuclear	yes	moderate	<25%	cytoplasmic	yes	negative	not set	not set	yes	negative	not set	not set	yes	negative	not set	not set	yes	moderate	<25%	cytoplasmic	yes	moderate	>75%	cytoplasmic	yes	negative	not set	not set
ENSG00000121060	HPA005909	yes	moderate	75%-25%	cytoplasmic	yes	negative	not set	not set	yes	negative	not set	not set	yes	negative	not set	not set	yes	negative	not set	not set	yes	negative	not set	not set	yes	moderate	<25%	cytoplasmic	yes	negative	not set	not set
ENSG00000118596	HPA005911	yes	negative	not set	not set	yes	negative	not set	not set	yes	negative	not set	not set	yes	strong	>75%	cytoplasmic	yes	negative	not set	not set	yes	negative	not set	not set	yes	negative	not set	not set	yes	negative	not set	not set
ENSG00000100503	HPA005939	yes	weak	75%-25%	cytoplasmic	yes	moderate	<25%	cytoplasmic	yes	negative	not set	not set	yes	negative	not set	not set	yes	negative	not set	not set	yes	negative	not set	not set	yes	negative	not set	not set	yes	moderate	<25%	cytoplasmic
ENSG00000146232	HPA005941	yes	moderate	>75%	cytoplasmic	yes	moderate	>75%	cytoplasmic	yes	moderate	>75%	cytoplasmic	yes	negative	not set	not set	yes	negative	not set	not set	yes	moderate	>75%	cytoplasmic	yes	moderate	>75%	cytoplasmic	yes	strong	>75%	cytoplasmic
ENSG00000147081	HPA005949	yes	weak	<25%	cytoplasmic	yes	strong	>75%	cytoplasmic	yes	weak	75%-25%	cytoplasmic	yes	negative	not set	not set	yes	weak	75%-25%	cytoplasmic	yes	weak	>75%	cytoplasmic	yes	negative	not set	not set	yes	negative	not set	not set
ENSG00000150753	HPA005958	yes	weak	75%-25%	cytoplasmic	yes	moderate	>75%	cytoplasmic	yes	strong	>75%	cytoplasmic,nuclear	yes	negative	not set	not set	yes	moderate	>75%	cytoplasmic	yes	strong	>75%	cytoplasmic,nuclear	yes	weak	>75%	cytoplasmic	yes	moderate	>75%	cytoplasmic
ENSG00000197702	HPA005964	yes	moderate	75%-25%	cytoplasmic	yes	negative	not set	not set	yes	negative	not set	not set	yes	negative	not set	not set	yes	negative	not set	not set	yes	negative	not set	not set	yes	negative	not set	not set	yes	moderate	75%-25%	cytoplasmic
ENSG00000168528	HPA005974	yes	moderate	>75%	cytoplasmic	yes	moderate	>75%	cytoplasmic	yes	weak	75%-25%	cytoplasmic	yes	negative	not set	not set	yes	negative	not set	not set	yes	moderate	>75%	cytoplasmic	yes	weak	75%-25%	cytoplasmic	yes	strong	>75%	cytoplasmic
ENSG00000081479	HPA005980	yes	moderate	75%-25%	cytoplasmic,membrane	yes	negative	not set	not set	yes	negative	not set	not set	yes	negative	not set	not set	yes	negative	not set	not set	yes	negative	not set	not set	yes	moderate	>75%	cytoplasmic,membrane	yes	negative	not set	not set
ENSG00000154277	HPA005993	yes	strong	75%-25%	cytoplasmic,membrane	yes	negative	not set	not set	yes	negative	not set	not set	yes	negative	not set	not set	yes	strong	>75%	cytoplasmic,membrane	yes	negative	not set	not set	yes	negative	not set	not set	yes	strong	>75%	cytoplasmic,membrane
ENSG00000185264	HPA005998	yes	weak	<25%	cytoplasmic	yes	strong	>75%	cytoplasmic	yes	weak	>75%	cytoplasmic	yes	weak	75%-25%	cytoplasmic	yes	weak	75%-25%	cytoplasmic	yes	weak	>75%	cytoplasmic	yes	negative	not set	not set	yes	moderate	>75%	nuclear
ENSG00000128595	HPA006018	yes	moderate	>75%	cytoplasmic	yes	negative	not set	not set	yes	negative	not set	not set	yes	negative	not set	not set	yes	negative	not set	not set	yes	negative	not set	not set	yes	moderate	>75%	cytoplasmic	yes	negative	not set	not set
ENSG00000149177	HPA006026	yes	negative	not set	not set	yes	negative	not set	not set	yes	negative	not set	not set	yes	negative	not set	not set	yes	negative	not set	not set	yes	negative	not set	not set	yes	moderate	<25%	cytoplasmic	yes	negative	not set	not set
ENSG00000072110,ENSG00000077522,ENSG00000130402,ENSG00000248746	HPA006035	yes	negative	not set	not set	yes	moderate	>75%	cytoplasmic,membrane	yes	moderate	>75%	cytoplasmic	yes	negative	not set	not set	yes	negative	not set	not set	yes	moderate	>75%	cytoplasmic	yes	negative	not set	not set	yes	negative	not set	not set
ENSG00000136942	HPA006047	yes	moderate	>75%	cytoplasmic	yes	weak	<25%	cytoplasmic,membrane	yes	moderate	rare	nuclear	yes	negative	not set	not set	yes	moderate	<25%	cytoplasmic,membrane	yes	moderate	rare	nuclear	yes	negative	not set	not set	yes	moderate	75%-25%	cytoplasmic,membrane
ENSG00000109381	HPA006057	yes	negative	not set	not set	yes	weak	<25%	cytoplasmic	yes	strong	75%-25%	nuclear	yes	negative	not set	not set	yes	moderate	<25%	nuclear	yes	strong	<25%	nuclear	yes	negative	not set	not set	yes	strong	<25%	nuclear
ENSG00000175110	HPA006083	yes	strong	>75%	cytoplasmic	yes	negative	not set	not set	yes	strong	<25%	cytoplasmic	yes	negative	not set	not set	yes	negative	not set	not set	yes	negative	not set	not set	yes	moderate	>75%	cytoplasmic	yes	strong	>75%	cytoplasmic
ENSG00000156650	HPA006104	yes	moderate	<25%	nuclear	yes	negative	not set	not set	yes	negative	not set	not set	yes	negative	not set	not set	yes	moderate	75%-25%	nuclear	yes	strong	75%-25%	nuclear	yes	negative	not set	not set	yes	strong	>75%	nuclear
ENSG00000162599	HPA006111	yes	strong	>75%	nuclear	yes	negative	not set	not set	yes	negative	not set	not set	yes	negative	not set	not set	yes	negative	not set	not set	yes	negative	not set	not set	yes	moderate	>75%	nuclear	yes	negative	not set	not set
ENSG00000187690	HPA006128	yes	negative	not set	not set	yes	negative	not set	not set	yes	strong	>75%	nuclear	yes	negative	not set	not set	yes	strong	>75%	nuclear	yes	moderate	>75%	nuclear	yes	negative	not set	not set	yes	strong	>75%	nuclear
ENSG00000155660	HPA006140	yes	weak	>75%	cytoplasmic	yes	negative	not set	not set	yes	moderate	<25%	cytoplasmic	yes	negative	not set	not set	yes	negative	not set	not set	yes	negative	not set	not set	yes	negative	not set	not set	yes	strong	>75%	cytoplasmic,membrane
ENSG00000162613	HPA006149	yes	strong	>75%	nuclear	yes	negative	not set	not set	yes	strong	>75%	nuclear	yes	strong	>75%	nuclear	yes	strong	>75%	nuclear	yes	strong	>75%	nuclear	yes	strong	>75%	nuclear	yes	strong	>75%	nuclear
ENSG00000039600	HPA006159	yes	moderate	<25%	cytoplasmic	yes	weak	<25%	cytoplasmic	yes	weak	>75%	cytoplasmic	yes	negative	not set	not set	yes	weak	>75%	cytoplasmic	yes	strong	>75%	nuclear	yes	negative	not set	not set	yes	weak	<25%	cytoplasmic
ENSG00000079263	HPA006162	yes	weak	>75%	cytoplasmic	yes	negative	not set	not set	yes	strong	75%-25%	cytoplasmic	yes	negative	not set	not set	yes	negative	not set	not set	yes	strong	>75%	cytoplasmic	yes	negative	not set	not set	yes	negative	not set	not set
ENSG00000129474	HPA006171	yes	weak	75%-25%	cytoplasmic	yes	moderate	>75%	cytoplasmic,membrane	yes	moderate	75%-25%	nuclear	yes	negative	not set	not set	yes	moderate	rare	nuclear	yes	strong	>75%	nuclear	yes	negative	not set	not set	yes	moderate	<25%	nuclear
ENSG00000115884	HPA006185	yes	negative	not set	not set	yes	negative	not set	not set	yes	strong	75%-25%	nuclear	yes	negative	not set	not set	yes	negative	not set	not set	yes	negative	not set	not set	yes	negative	not set	not set	yes	negative	not set	not set
ENSG00000148835	HPA006195	yes	moderate	75%-25%	cytoplasmic	yes	negative	not set	not set	yes	moderate	75%-25%	nuclear	yes	negative	not set	not set	yes	moderate	75%-25%	nuclear	yes	strong	75%-25%	nuclear	yes	moderate	75%-25%	nuclear	yes	strong	>75%	nuclear
ENSG00000117054	HPA006198	yes	moderate	>75%	cytoplasmic	yes	negative	not set	not set	yes	strong	75%-25%	cytoplasmic	yes	negative	not set	not set	yes	negative	not set	not set	yes	strong	75%-25%	cytoplasmic	yes	negative	not set	not set	yes	strong	>75%	cytoplasmic
ENSG00000149480	HPA006214	yes	moderate	>75%	nuclear	yes	negative	not set	not set	yes	strong	75%-25%	nuclear	yes	strong	>75%	nuclear	yes	strong	>75%	nuclear	yes	negative	not set	not set	yes	strong	>75%	nuclear	yes	strong	>75%	nuclear
ENSG00000111727	HPA006227	yes	weak	75%-25%	cytoplasmic	yes	strong	75%-25%	cytoplasmic,nuclear	yes	negative	not set	not set	yes	negative	not set	not set	yes	negative	not set	not set	yes	strong	75%-25%	nuclear	yes	negative	not set	not set	yes	negative	not set	not set
ENSG00000100591	CAB006244	yes	moderate	>75%	cytoplasmic	yes	negative	not set	not set	yes	negative	not set	not set	yes	negative	not set	not set	yes	negative	not set	not set	yes	strong	<25%	nuclear	yes	moderate	>75%	cytoplasmic	yes	negative	not set	not set
ENSG00000171595	CAB006245	yes	negative	not set	not set	yes	strong	>75%	cytoplasmic,membrane	yes	strong	75%-25%	cytoplasmic,membrane	yes	negative	not set	not set	yes	negative	not set	not set	yes	strong	>75%	cytoplasmic,membrane	yes	negative	not set	not set	yes	negative	not set	not set
ENSG00000229314	CAB006265	yes	moderate	75%-25%	cytoplasmic	yes	strong	75%-25%	nuclear	yes	strong	75%-25%	nuclear	yes	negative	not set	not set	yes	strong	<25%	nuclear	yes	strong	75%-25%	nuclear	yes	negative	not set	not set	yes	strong	<25%	nuclear
ENSG00000102030	CAB006269	yes	strong	>75%	cytoplasmic	yes	negative	not set	not set	yes	negative	not set	not set	yes	negative	not set	not set	yes	negative	not set	not set	yes	negative	not set	not set	yes	strong	>75%	cytoplasmic	yes	negative	not set	not set
ENSG00000150753	CAB006271	yes	weak	<25%	cytoplasmic	yes	negative	not set	not set	yes	strong	75%-25%	nuclear	yes	negative	not set	not set	yes	negative	not set	not set	yes	strong	75%-25%	nuclear	yes	moderate	>75%	cytoplasmic	yes	strong	75%-25%	cytoplasmic
ENSG00000169231	HPA006293	yes	moderate	>75%	cytoplasmic	yes	negative	not set	not set	yes	negative	not set	not set	yes	negative	not set	not set	yes	negative	not set	not set	yes	negative	not set	not set	yes	moderate	>75%	cytoplasmic	yes	negative	not set	not set
ENSG00000204438	HPA006301	yes	strong	>75%	cytoplasmic	yes	moderate	75%-25%	cytoplasmic	yes	moderate	<25%	cytoplasmic	yes	negative	not set	not set	yes	strong	>75%	cytoplasmic	yes	moderate	<25%	cytoplasmic	yes	negative	not set	not set	yes	negative	not set	not set
ENSG00000153904	HPA006308	yes	strong	>75%	cytoplasmic	yes	moderate	<25%	cytoplasmic	yes	negative	not set	not set	yes	negative	not set	not set	yes	negative	not set	not set	yes	negative	not set	not set	yes	moderate	>75%	cytoplasmic	yes	negative	not set	not set
ENSG00000197448	HPA006311	yes	moderate	>75%	cytoplasmic	yes	negative	not set	not set	yes	negative	not set	not set	yes	negative	not set	not set	yes	negative	not set	not set	yes	negative	not set	not set	yes	moderate	75%-25%	cytoplasmic	yes	negative	not set	not set
ENSG00000240682,ENSG00000261796	HPA006312	yes	strong	<25%	nuclear	yes	negative	not set	not set	yes	moderate	<25%	nuclear	yes	moderate	>75%	nuclear	yes	moderate	75%-25%	nuclear	yes	negative	not set	not set	yes	moderate	75%-25%	nuclear	yes	moderate	75%-25%	nuclear
ENSG00000140694	HPA006314	yes	strong	>75%	cytoplasmic,nuclear	yes	weak	>75%	cytoplasmic	yes	strong	>75%	nuclear	yes	negative	not set	not set	yes	strong	>75%	nuclear	yes	strong	>75%	nuclear	yes	strong	>75%	nuclear	yes	strong	>75%	nuclear
ENSG00000126062	CAB006319	yes	strong	>75%	cytoplasmic	yes	negative	not set	not set	yes	moderate	75%-25%	nuclear	yes	negative	not set	not set	yes	negative	not set	not set	yes	moderate	>75%	cytoplasmic	yes	negative	not set	not set	yes	negative	not set	not set
ENSG00000131016	HPA006344	yes	negative	not set	not set	yes	negative	not set	not set	yes	negative	not set	not set	yes	negative	not set	not set	yes	negative	not set	not set	yes	negative	not set	not set	yes	strong	>75%	cytoplasmic	yes	negative	not set	not set
ENSG00000165704	HPA006360	yes	weak	>75%	cytoplasmic	yes	strong	>75%	cytoplasmic,membrane,nuclear	yes	strong	>75%	cytoplasmic,membrane,nuclear	yes	negative	not set	not set	yes	strong	>75%	cytoplasmic,membrane,nuclear	yes	strong	>75%	cytoplasmic,membrane,nuclear	yes	strong	>75%	cytoplasmic,membrane,nuclear	yes	strong	>75%	cytoplasmic,membrane,nuclear
ENSG00000101126	HPA006371	yes	moderate	<25%	nuclear	yes	negative	not set	not set	yes	moderate	<25%	nuclear	yes	negative	not set	not set	yes	strong	75%-25%	nuclear	yes	negative	not set	not set	yes	negative	not set	not set	yes	strong	75%-25%	nuclear
ENSG00000128283	HPA006379	yes	weak	<25%	cytoplasmic	yes	negative	not set	not set	yes	negative	not set	not set	yes	negative	not set	not set	yes	negative	not set	not set	yes	strong	>75%	cytoplasmic,membrane	yes	negative	not set	not set	yes	negative	not set	not set
ENSG00000159423	HPA006401	yes	weak	<25%	cytoplasmic	yes	negative	not set	not set	yes	strong	75%-25%	cytoplasmic,membrane	yes	negative	not set	not set	yes	negative	not set	not set	yes	strong	<25%	cytoplasmic	yes	weak	<25%	cytoplasmic	yes	negative	not set	not set
ENSG00000178913	HPA006429	yes	weak	75%-25%	nuclear	yes	negative	not set	not set	yes	moderate	75%-25%	cytoplasmic	yes	negative	not set	not set	yes	moderate	75%-25%	nuclear	yes	moderate	75%-25%	cytoplasmic	yes	weak	75%-25%	nuclear	yes	moderate	75%-25%	nuclear
ENSG00000188021	HPA006431	yes	weak	>75%	cytoplasmic	yes	negative	not set	not set	yes	negative	not set	not set	yes	negative	not set	not set	yes	negative	not set	not set	yes	negative	not set	not set	yes	weak	>75%	cytoplasmic	yes	negative	not set	not set
ENSG00000106992	HPA006456	yes	strong	>75%	cytoplasmic,nuclear	yes	moderate	>75%	cytoplasmic	yes	negative	not set	not set	yes	strong	75%-25%	cytoplasmic,nuclear	yes	negative	not set	not set	yes	negative	not set	not set	yes	weak	75%-25%	cytoplasmic	yes	negative	not set	not set
ENSG00000122882	HPA006465	yes	negative	not set	not set	yes	negative	not set	not set	yes	negative	not set	not set	yes	moderate	<25%	nuclear	yes	negative	not set	not set	yes	negative	not set	not set	yes	negative	not set	not set	yes	strong	75%-25%	nuclear
ENSG00000148835	HPA006474	yes	negative	not set	not set	yes	negative	not set	not set	yes	strong	>75%	nuclear	yes	negative	not set	not set	yes	strong	>75%	nuclear	yes	strong	>75%	nuclear	yes	strong	>75%	nuclear	yes	strong	>75%	nuclear
ENSG00000169717	HPA006480	yes	negative	not set	not set	yes	strong	>75%	cytoplasmic,nuclear	yes	moderate	>75%	cytoplasmic	yes	negative	not set	not set	yes	moderate	>75%	cytoplasmic	yes	strong	>75%	cytoplasmic	yes	weak	>75%	cytoplasmic	yes	moderate	>75%	cytoplasmic
ENSG00000065833	HPA006493	yes	moderate	>75%	cytoplasmic	yes	strong	75%-25%	cytoplasmic	yes	negative	not set	not set	yes	negative	not set	not set	yes	negative	not set	not set	yes	moderate	<25%	nuclear	yes	strong	>75%	cytoplasmic	yes	negative	not set	not set
ENSG00000103152	HPA006531	yes	moderate	>75%	cytoplasmic	yes	negative	not set	not set	yes	negative	not set	not set	yes	weak	<25%	cytoplasmic	yes	moderate	<25%	nuclear	yes	moderate	<25%	nuclear	yes	negative	not set	not set	yes	strong	<25%	nuclear
ENSG00000059804,ENSG00000173262	HPA006539	yes	negative	not set	not set	yes	strong	>75%	cytoplasmic	yes	strong	>75%	cytoplasmic	yes	negative	not set	not set	yes	negative	not set	not set	yes	strong	>75%	cytoplasmic	yes	negative	not set	not set	yes	negative	not set	not set
ENSG00000111229	HPA006550	yes	negative	not set	not set	yes	negative	not set	not set	yes	moderate	75%-25%	nuclear	yes	negative	not set	not set	yes	strong	75%-25%	nuclear	yes	strong	75%-25%	nuclear	yes	negative	not set	not set	yes	strong	75%-25%	nuclear
ENSG00000076555	HPA006554	yes	negative	not set	not set	yes	strong	>75%	cytoplasmic,nuclear	yes	negative	not set	not set	yes	negative	not set	not set	yes	negative	not set	not set	yes	negative	not set	not set	yes	negative	not set	not set	yes	negative	not set	not set
ENSG00000151229	HPA006584	yes	moderate	75%-25%	cytoplasmic	yes	moderate	75%-25%	nuclear	yes	negative	not set	not set	yes	negative	not set	not set	yes	negative	not set	not set	yes	moderate	<25%	membrane,nuclear	yes	negative	not set	not set	yes	negative	not set	not set
ENSG00000187446	HPA006616	yes	moderate	>75%	cytoplasmic	yes	negative	not set	not set	yes	negative	not set	not set	yes	negative	not set	not set	yes	moderate	>75%	cytoplasmic,nuclear	yes	negative	not set	not set	yes	moderate	75%-25%	cytoplasmic	yes	negative	not set	not set
ENSG00000198824	HPA006623	yes	moderate	>75%	nuclear	yes	negative	not set	not set	yes	negative	not set	not set	yes	strong	>75%	nuclear	yes	strong	>75%	nuclear	yes	negative	not set	not set	yes	strong	>75%	membrane,nuclear	yes	strong	>75%	nuclear
ENSG00000239306	HPA006628	yes	negative	not set	not set	yes	negative	not set	not set	yes	strong	<25%	nuclear	yes	negative	not set	not set	yes	moderate	>75%	nuclear	yes	strong	>75%	nuclear	yes	weak	<25%	nuclear	yes	strong	<25%	nuclear
ENSG00000158691	HPA006637	yes	negative	not set	not set	yes	negative	not set	not set	yes	moderate	75%-25%	nuclear	yes	negative	not set	not set	yes	strong	<25%	nuclear	yes	strong	75%-25%	nuclear	yes	negative	not set	not set	yes	moderate	<25%	nuclear
ENSG00000079819	HPA006642	yes	moderate	>75%	cytoplasmic	yes	negative	not set	not set	yes	negative	not set	not set	yes	negative	not set	not set	yes	negative	not set	not set	yes	negative	not set	not set	yes	moderate	>75%	cytoplasmic	yes	negative	not set	not set
ENSG00000215845	HPA006655	yes	weak	<25%	cytoplasmic,nuclear	yes	negative	not set	not set	yes	negative	not set	not set	yes	negative	not set	not set	yes	moderate	75%-25%	nuclear	yes	negative	not set	not set	yes	weak	75%-25%	cytoplasmic	yes	moderate	75%-25%	nuclear
ENSG00000160789	HPA006660	yes	moderate	75%-25%	cytoplasmic,nuclear	yes	negative	not set	not set	yes	strong	>75%	membrane,nuclear	yes	strong	75%-25%	nuclear	yes	negative	not set	not set	yes	strong	>75%	nuclear	yes	strong	>75%	membrane,nuclear	yes	negative	not set	not set
ENSG00000029363	HPA006669	yes	weak	75%-25%	cytoplasmic	yes	negative	not set	not set	yes	strong	>75%	nuclear	yes	negative	not set	not set	yes	strong	75%-25%	nuclear	yes	strong	>75%	nuclear	yes	strong	>75%	nuclear	yes	strong	>75%	nuclear
ENSG00000169760	HPA006680	yes	moderate	>75%	cytoplasmic	yes	negative	not set	not set	yes	negative	not set	not set	yes	negative	not set	not set	yes	negative	not set	not set	yes	negative	not set	not set	yes	moderate	>75%	cytoplasmic	yes	negative	not set	not set
ENSG00000113456	HPA006692	yes	weak	>75%	cytoplasmic,membrane	yes	negative	not set	not set	yes	weak	75%-25%	nuclear	yes	negative	not set	not set	yes	negative	not set	not set	yes	strong	>75%	nuclear	yes	negative	not set	not set	yes	strong	75%-25%	nuclear
ENSG00000157212	HPA006694	yes	moderate	<25%	nuclear	yes	negative	not set	not set	yes	negative	not set	not set	yes	moderate	<25%	nuclear	yes	negative	not set	not set	yes	moderate	<25%	nuclear	yes	negative	not set	not set	yes	strong	<25%	nuclear
ENSG00000099341	HPA006702	yes	moderate	75%-25%	cytoplasmic	yes	moderate	<25%	cytoplasmic	yes	moderate	<25%	cytoplasmic	yes	negative	not set	not set	yes	negative	not set	not set	yes	negative	not set	not set	yes	negative	not set	not set	yes	negative	not set	not set
ENSG00000070950	HPA006716	yes	moderate	75%-25%	cytoplasmic	yes	negative	not set	not set	yes	moderate	<25%	nuclear	yes	negative	not set	not set	yes	strong	<25%	nuclear	yes	negative	not set	not set	yes	negative	not set	not set	yes	strong	<25%	cytoplasmic
ENSG00000073050	HPA006717	yes	negative	not set	not set	yes	negative	not set	not set	yes	strong	<25%	nuclear	yes	negative	not set	not set	yes	moderate	<25%	nuclear	yes	strong	75%-25%	nuclear	yes	moderate	75%-25%	nuclear	yes	negative	not set	not set
ENSG00000166848	HPA006719	yes	moderate	75%-25%	nuclear	yes	weak	75%-25%	cytoplasmic,membrane	yes	strong	>75%	nuclear	yes	negative	not set	not set	yes	strong	75%-25%	nuclear	yes	strong	75%-25%	nuclear	yes	strong	>75%	nuclear	yes	strong	75%-25%	nuclear
ENSG00000005156	HPA006723	yes	negative	not set	not set	yes	negative	not set	not set	yes	moderate	75%-25%	nuclear	yes	negative	not set	not set	yes	moderate	<25%	nuclear	yes	moderate	>75%	nuclear	yes	weak	<25%	nuclear	yes	negative	not set	not set
ENSG00000172613	HPA006725	yes	negative	not set	not set	yes	negative	not set	not set	yes	negative	not set	not set	yes	negative	not set	not set	yes	strong	75%-25%	nuclear	yes	moderate	75%-25%	nuclear	yes	weak	75%-25%	nuclear	yes	strong	>75%	nuclear
ENSG00000103194	HPA006731	yes	strong	>75%	cytoplasmic	yes	negative	not set	not set	yes	negative	not set	not set	yes	negative	not set	not set	yes	negative	not set	not set	yes	negative	not set	not set	yes	strong	>75%	cytoplasmic	yes	negative	not set	not set
ENSG00000136807	HPA006738	yes	moderate	75%-25%	nuclear	yes	weak	>75%	cytoplasmic	yes	strong	>75%	nuclear	yes	negative	not set	not set	yes	strong	>75%	nuclear	yes	moderate	75%-25%	nuclear	yes	strong	>75%	nuclear	yes	strong	>75%	nuclear
ENSG00000168496	HPA006748	yes	moderate	<25%	cytoplasmic	yes	negative	not set	not set	yes	strong	75%-25%	nuclear	yes	negative	not set	not set	yes	strong	<25%	nuclear	yes	strong	75%-25%	nuclear	yes	negative	not set	not set	yes	strong	75%-25%	nuclear
ENSG00000107959	HPA006753	yes	moderate	<25%	cytoplasmic	yes	negative	not set	not set	yes	negative	not set	not set	yes	negative	not set	not set	yes	negative	not set	not set	yes	negative	not set	not set	yes	negative	not set	not set	yes	strong	<25%	cytoplasmic
ENSG00000167491	HPA006759	yes	negative	not set	not set	yes	negative	not set	not set	yes	negative	not set	not set	yes	negative	not set	not set	yes	strong	<25%	nuclear	yes	negative	not set	not set	yes	strong	<25%	nuclear	yes	strong	>75%	nuclear
ENSG00000060971	HPA006764	yes	moderate	<25%	cytoplasmic	yes	negative	not set	not set	yes	negative	not set	not set	yes	negative	not set	not set	yes	negative	not set	not set	yes	negative	not set	not set	yes	moderate	<25%	cytoplasmic	yes	negative	not set	not set
ENSG00000048028	HPA006778	yes	moderate	75%-25%	cytoplasmic	yes	negative	not set	not set	yes	negative	not set	not set	yes	negative	not set	not set	yes	moderate	<25%	nuclear	yes	strong	<25%	nuclear	yes	negative	not set	not set	yes	strong	<25%	cytoplasmic
ENSG00000048028	HPA006779	yes	moderate	<25%	cytoplasmic	yes	negative	not set	not set	yes	moderate	<25%	nuclear	yes	negative	not set	not set	yes	strong	<25%	nuclear	yes	moderate	<25%	nuclear	yes	negative	not set	not set	yes	strong	<25%	nuclear
ENSG00000039650	HPA006782	yes	negative	not set	not set	yes	negative	not set	not set	yes	moderate	<25%	nuclear	yes	negative	not set	not set	yes	negative	not set	not set	yes	moderate	>75%	nuclear	yes	negative	not set	not set	yes	negative	not set	not set
ENSG00000143442	HPA006800	yes	weak	<25%	nuclear	yes	negative	not set	not set	yes	strong	75%-25%	nuclear	yes	negative	not set	not set	yes	strong	75%-25%	nuclear	yes	strong	<25%	nuclear	yes	negative	not set	not set	yes	strong	75%-25%	nuclear
ENSG00000152422	HPA006801	yes	moderate	<25%	nuclear	yes	negative	not set	not set	yes	strong	>75%	nuclear	yes	negative	not set	not set	yes	strong	>75%	nuclear	yes	strong	>75%	nuclear	yes	strong	>75%	nuclear	yes	negative	not set	not set
ENSG00000133789	HPA006810	yes	moderate	<25%	cytoplasmic	yes	negative	not set	not set	yes	negative	not set	not set	yes	negative	not set	not set	yes	negative	not set	not set	yes	negative	not set	not set	yes	negative	not set	not set	yes	weak	<25%	cytoplasmic
ENSG00000103490	CAB006853	yes	strong	>75%	cytoplasmic	yes	negative	not set	not set	yes	negative	not set	not set	yes	negative	not set	not set	yes	negative	not set	not set	yes	negative	not set	not set	yes	weak	<25%	cytoplasmic	yes	negative	not set	not set
ENSG00000157106	HPA006870	yes	moderate	75%-25%	cytoplasmic	yes	negative	not set	not set	yes	negative	not set	not set	yes	negative	not set	not set	yes	negative	not set	not set	yes	moderate	75%-25%	cytoplasmic	yes	moderate	75%-25%	nuclear	yes	negative	not set	not set
ENSG00000134243	HPA006889	yes	moderate	>75%	cytoplasmic	yes	negative	not set	not set	yes	negative	not set	not set	yes	negative	not set	not set	yes	negative	not set	not set	yes	negative	not set	not set	yes	moderate	75%-25%	cytoplasmic,membrane	yes	negative	not set	not set
ENSG00000114573	CAB006910	yes	moderate	>75%	cytoplasmic	yes	negative	not set	not set	yes	moderate	<25%	nuclear	yes	negative	not set	not set	yes	strong	>75%	nuclear	yes	moderate	<25%	nuclear	yes	negative	not set	not set	yes	strong	75%-25%	nuclear
ENSG00000188342	HPA006912	yes	weak	<25%	cytoplasmic	yes	negative	not set	not set	yes	negative	not set	not set	yes	negative	not set	not set	yes	strong	<25%	nuclear	yes	strong	<25%	nuclear	yes	negative	not set	not set	yes	strong	75%-25%	nuclear
ENSG00000132383	HPA006914	yes	negative	not set	not set	yes	negative	not set	not set	yes	negative	not set	not set	yes	negative	not set	not set	yes	negative	not set	not set	yes	moderate	<25%	nuclear	yes	moderate	75%-25%	nuclear	yes	strong	>75%	nuclear
ENSG00000137337	HPA006915	yes	moderate	75%-25%	cytoplasmic,nuclear	yes	strong	>75%	cytoplasmic,membrane,nuclear	yes	strong	>75%	nuclear	yes	negative	not set	not set	yes	strong	75%-25%	nuclear	yes	strong	>75%	nuclear	yes	negative	not set	not set	yes	weak	75%-25%	nuclear
ENSG00000163346	HPA006949	yes	strong	>75%	cytoplasmic	yes	strong	75%-25%	cytoplasmic	yes	negative	not set	not set	yes	negative	not set	not set	yes	moderate	<25%	cytoplasmic	yes	negative	not set	not set	yes	negative	not set	not set	yes	strong	<25%	cytoplasmic
ENSG00000117592	HPA006983	yes	moderate	>75%	cytoplasmic	yes	negative	not set	not set	yes	moderate	75%-25%	nuclear	yes	moderate	<25%	nuclear	yes	moderate	75%-25%	nuclear	yes	moderate	<25%	nuclear	yes	moderate	>75%	cytoplasmic	yes	negative	not set	not set
ENSG00000178764	HPA006996	yes	weak	75%-25%	cytoplasmic	yes	negative	not set	not set	yes	negative	not set	not set	yes	negative	not set	not set	yes	negative	not set	not set	yes	negative	not set	not set	yes	weak	75%-25%	cytoplasmic	yes	negative	not set	not set
ENSG00000172262	HPA007023	yes	negative	not set	not set	yes	negative	not set	not set	yes	strong	75%-25%	nuclear	yes	negative	not set	not set	yes	strong	75%-25%	nuclear	yes	negative	not set	not set	yes	strong	>75%	nuclear	yes	negative	not set	not set
ENSG00000142173	HPA007029	yes	negative	not set	not set	yes	negative	not set	not set	yes	weak	<25%	cytoplasmic	yes	moderate	75%-25%	cytoplasmic	yes	negative	not set	not set	yes	weak	75%-25%	cytoplasmic	yes	negative	not set	not set	yes	negative	not set	not set
ENSG00000139567	HPA007041	yes	weak	>75%	cytoplasmic,membrane	yes	strong	>75%	nuclear	yes	negative	not set	not set	yes	negative	not set	not set	yes	negative	not set	not set	yes	strong	>75%	nuclear	yes	negative	not set	not set	yes	negative	not set	not set
ENSG00000156515	HPA007043	yes	moderate	75%-25%	cytoplasmic	yes	moderate	>75%	cytoplasmic	yes	negative	not set	not set	yes	negative	not set	not set	yes	negative	not set	not set	yes	negative	not set	not set	yes	negative	not set	not set	yes	negative	not set	not set
ENSG00000156515	HPA007044	yes	moderate	75%-25%	cytoplasmic	yes	moderate	>75%	cytoplasmic	yes	negative	not set	not set	yes	negative	not set	not set	yes	negative	not set	not set	yes	negative	not set	not set	yes	negative	not set	not set	yes	negative	not set	not set
ENSG00000155111	HPA007053	yes	moderate	75%-25%	cytoplasmic,membrane	yes	moderate	>75%	cytoplasmic,membrane	yes	moderate	75%-25%	nuclear	yes	moderate	>75%	cytoplasmic,membrane	yes	negative	not set	not set	yes	strong	>75%	nuclear	yes	negative	not set	not set	yes	negative	not set	not set
ENSG00000133858	HPA007072	yes	moderate	<25%	nuclear	yes	negative	not set	not set	yes	negative	not set	not set	yes	moderate	<25%	nuclear	yes	negative	not set	not set	yes	negative	not set	not set	yes	negative	not set	not set	yes	strong	75%-25%	nuclear
ENSG00000116604	HPA007114	yes	negative	not set	not set	yes	negative	not set	not set	yes	negative	not set	not set	yes	negative	not set	not set	yes	negative	not set	not set	yes	negative	not set	not set	yes	negative	not set	not set	yes	moderate	75%-25%	nuclear
ENSG00000101350	HPA007119	yes	weak	<25%	cytoplasmic	yes	negative	not set	not set	yes	negative	not set	not set	yes	moderate	75%-25%	cytoplasmic	yes	negative	not set	not set	yes	negative	not set	not set	yes	strong	>75%	cytoplasmic,membrane	yes	negative	not set	not set
ENSG00000159618	HPA007133	yes	negative	not set	not set	yes	strong	>75%	nuclear	yes	negative	not set	not set	yes	negative	not set	not set	yes	negative	not set	not set	yes	strong	<25%	cytoplasmic	yes	negative	not set	not set	yes	negative	not set	not set
ENSG00000133858	HPA007151	yes	strong	75%-25%	nuclear	yes	negative	not set	not set	yes	strong	>75%	nuclear	yes	strong	75%-25%	nuclear	yes	strong	>75%	nuclear	yes	strong	>75%	nuclear	yes	strong	>75%	nuclear	yes	strong	>75%	nuclear
ENSG00000116014	HPA007156	yes	strong	75%-25%	cytoplasmic,membrane	yes	negative	not set	not set	yes	negative	not set	not set	yes	negative	not set	not set	yes	strong	75%-25%	cytoplasmic	yes	weak	75%-25%	cytoplasmic	yes	negative	not set	not set	yes	strong	75%-25%	cytoplasmic
ENSG00000197142	HPA007162	yes	weak	<25%	cytoplasmic	yes	moderate	<25%	cytoplasmic	yes	negative	not set	not set	yes	negative	not set	not set	yes	negative	not set	not set	yes	negative	not set	not set	yes	negative	not set	not set	yes	moderate	<25%	cytoplasmic
ENSG00000137166	HPA007176	yes	moderate	75%-25%	cytoplasmic,membrane	yes	negative	not set	not set	yes	negative	not set	not set	yes	negative	not set	not set	yes	strong	>75%	nuclear	yes	negative	not set	not set	yes	negative	not set	not set	yes	strong	>75%	nuclear
ENSG00000204356	HPA007187	yes	negative	not set	not set	yes	negative	not set	not set	yes	moderate	75%-25%	nuclear	yes	negative	not set	not set	yes	moderate	<25%	nuclear	yes	strong	75%-25%	nuclear	yes	negative	not set	not set	yes	strong	75%-25%	nuclear
ENSG00000178467	HPA007199	yes	strong	>75%	cytoplasmic	yes	negative	not set	not set	yes	negative	not set	not set	yes	negative	not set	not set	yes	negative	not set	not set	yes	negative	not set	not set	yes	moderate	75%-25%	cytoplasmic	yes	negative	not set	not set
ENSG00000036672	HPA007222	yes	weak	75%-25%	cytoplasmic	yes	negative	not set	not set	yes	negative	not set	not set	yes	negative	not set	not set	yes	negative	not set	not set	yes	negative	not set	not set	yes	moderate	75%-25%	cytoplasmic	yes	negative	not set	not set
ENSG00000110651	HPA007234	yes	moderate	<25%	cytoplasmic	yes	strong	>75%	cytoplasmic,membrane	yes	negative	not set	not set	yes	negative	not set	not set	yes	negative	not set	not set	yes	negative	not set	not set	yes	strong	>75%	cytoplasmic,membrane	yes	negative	not set	not set
ENSG00000140265	HPA007241	yes	strong	>75%	cytoplasmic	yes	negative	not set	not set	yes	strong	75%-25%	nuclear	yes	moderate	75%-25%	cytoplasmic	yes	strong	75%-25%	nuclear	yes	strong	75%-25%	nuclear	yes	strong	>75%	nuclear	yes	strong	>75%	nuclear
ENSG00000159166	HPA007256	yes	strong	75%-25%	cytoplasmic	yes	negative	not set	not set	yes	negative	not set	not set	yes	negative	not set	not set	yes	negative	not set	not set	yes	negative	not set	not set	yes	moderate	<25%	cytoplasmic	yes	negative	not set	not set
ENSG00000183049	HPA007266	yes	moderate	<25%	cytoplasmic	yes	negative	not set	not set	yes	negative	not set	not set	yes	negative	not set	not set	yes	negative	not set	not set	yes	negative	not set	not set	yes	strong	75%-25%	cytoplasmic	yes	negative	not set	not set
ENSG00000168067	HPA007330	yes	weak	75%-25%	cytoplasmic	yes	negative	not set	not set	yes	negative	not set	not set	yes	negative	not set	not set	yes	negative	not set	not set	yes	negative	not set	not set	yes	weak	75%-25%	cytoplasmic	yes	moderate	75%-25%	cytoplasmic
ENSG00000145022	HPA007342	yes	strong	>75%	cytoplasmic	yes	negative	not set	not set	yes	negative	not set	not set	yes	strong	75%-25%	cytoplasmic	yes	negative	not set	not set	yes	negative	not set	not set	yes	strong	>75%	cytoplasmic,membrane,nuclear	yes	negative	not set	not set
ENSG00000196975	HPA007393	yes	weak	<25%	cytoplasmic,membrane	yes	negative	not set	not set	yes	moderate	75%-25%	cytoplasmic,membrane	yes	negative	not set	not set	yes	negative	not set	not set	yes	moderate	75%-25%	cytoplasmic,membrane	yes	negative	not set	not set	yes	negative	not set	not set
ENSG00000111850	HPA007401	yes	weak	75%-25%	cytoplasmic	yes	negative	not set	not set	yes	negative	not set	not set	yes	negative	not set	not set	yes	moderate	<25%	cytoplasmic,nuclear	yes	negative	not set	not set	yes	negative	not set	not set	yes	negative	not set	not set
ENSG00000117625	HPA007413	yes	moderate	75%-25%	nuclear	yes	negative	not set	not set	yes	moderate	<25%	nuclear	yes	negative	not set	not set	yes	moderate	75%-25%	nuclear	yes	moderate	>75%	nuclear	yes	moderate	>75%	nuclear	yes	strong	>75%	nuclear
ENSG00000117480	HPA007425	yes	weak	>75%	cytoplasmic,membrane	yes	strong	>75%	cytoplasmic,membrane	yes	strong	>75%	cytoplasmic,membrane	yes	negative	not set	not set	yes	negative	not set	not set	yes	strong	>75%	cytoplasmic,membrane	yes	negative	not set	not set	yes	negative	not set	not set
ENSG00000143621	HPA007484	yes	strong	>75%	nuclear	yes	negative	not set	not set	yes	strong	>75%	nuclear	yes	strong	>75%	nuclear	yes	strong	>75%	nuclear	yes	strong	>75%	nuclear	yes	strong	>75%	nuclear	yes	strong	>75%	nuclear
ENSG00000164574	HPA007525	yes	weak	>75%	cytoplasmic	yes	negative	not set	not set	yes	negative	not set	not set	yes	strong	>75%	cytoplasmic	yes	negative	not set	not set	yes	negative	not set	not set	yes	negative	not set	not set	yes	moderate	75%-25%	cytoplasmic
ENSG00000068745	HPA007532	yes	moderate	>75%	cytoplasmic	yes	negative	not set	not set	yes	moderate	<25%	cytoplasmic	yes	negative	not set	not set	yes	moderate	<25%	cytoplasmic	yes	moderate	<25%	cytoplasmic	yes	negative	not set	not set	yes	strong	<25%	cytoplasmic
ENSG00000162493	HPA007534	yes	negative	not set	not set	yes	weak	<25%	cytoplasmic	yes	moderate	<25%	cytoplasmic	yes	negative	not set	not set	yes	negative	not set	not set	yes	moderate	75%-25%	cytoplasmic	yes	negative	not set	not set	yes	negative	not set	not set
ENSG00000111981	HPA007547	yes	weak	>75%	cytoplasmic	yes	strong	75%-25%	cytoplasmic	yes	negative	not set	not set	yes	negative	not set	not set	yes	negative	not set	not set	yes	negative	not set	not set	yes	strong	>75%	membrane	yes	negative	not set	not set
ENSG00000112852	HPA007548	yes	weak	75%-25%	cytoplasmic,membrane	yes	moderate	>75%	cytoplasmic,membrane	yes	negative	not set	not set	yes	negative	not set	not set	yes	negative	not set	not set	yes	negative	not set	not set	yes	negative	not set	not set	yes	negative	not set	not set
ENSG00000168542	HPA007583	yes	moderate	>75%	cytoplasmic	yes	weak	>75%	cytoplasmic,membrane	yes	negative	not set	not set	yes	negative	not set	not set	yes	negative	not set	not set	yes	negative	not set	not set	yes	negative	not set	not set	yes	moderate	>75%	cytoplasmic
ENSG00000176390	HPA007596	yes	weak	75%-25%	cytoplasmic	yes	negative	not set	not set	yes	moderate	75%-25%	cytoplasmic	yes	negative	not set	not set	yes	moderate	75%-25%	cytoplasmic	yes	moderate	75%-25%	cytoplasmic	yes	weak	>75%	cytoplasmic	yes	strong	75%-25%	cytoplasmic
ENSG00000107537	HPA007598	yes	weak	>75%	cytoplasmic	yes	negative	not set	not set	yes	negative	not set	not set	yes	negative	not set	not set	yes	negative	not set	not set	yes	negative	not set	not set	yes	moderate	75%-25%	cytoplasmic	yes	negative	not set	not set
ENSG00000122884	HPA007599	yes	strong	>75%	cytoplasmic	yes	moderate	<25%	cytoplasmic	yes	strong	75%-25%	cytoplasmic	yes	negative	not set	not set	yes	moderate	<25%	cytoplasmic	yes	moderate	75%-25%	cytoplasmic	yes	negative	not set	not set	yes	strong	75%-25%	cytoplasmic
ENSG00000071073	HPA007608	yes	moderate	>75%	cytoplasmic,membrane	yes	moderate	75%-25%	cytoplasmic,membrane	yes	negative	not set	not set	yes	weak	>75%	cytoplasmic,membrane	yes	negative	not set	not set	yes	negative	not set	not set	yes	weak	>75%	cytoplasmic,membrane	yes	negative	not set	not set
ENSG00000064393	HPA007611	yes	weak	<25%	cytoplasmic	yes	negative	not set	not set	yes	negative	not set	not set	yes	negative	not set	not set	yes	strong	<25%	nuclear	yes	negative	not set	not set	yes	negative	not set	not set	yes	strong	<25%	nuclear
ENSG00000115339	HPA007613	yes	weak	<25%	cytoplasmic	yes	negative	not set	not set	yes	weak	<25%	cytoplasmic	yes	negative	not set	not set	yes	negative	not set	not set	yes	negative	not set	not set	yes	weak	75%-25%	cytoplasmic	yes	negative	not set	not set
ENSG00000115604	HPA007615	yes	strong	>75%	cytoplasmic,membrane	yes	moderate	>75%	cytoplasmic,membrane	yes	moderate	75%-25%	cytoplasmic,membrane	yes	negative	not set	not set	yes	moderate	<25%	cytoplasmic,membrane	yes	negative	not set	not set	yes	negative	not set	not set	yes	strong	>75%	cytoplasmic,membrane
ENSG00000165119	HPA007644	yes	strong	75%-25%	cytoplasmic,nuclear	yes	negative	not set	not set	yes	strong	>75%	nuclear	yes	strong	>75%	nuclear	yes	strong	>75%	nuclear	yes	strong	>75%	nuclear	yes	strong	>75%	nuclear	yes	strong	>75%	nuclear
ENSG00000184500	HPA007724	yes	moderate	>75%	cytoplasmic	yes	negative	not set	not set	yes	negative	not set	not set	yes	negative	not set	not set	yes	moderate	<25%	cytoplasmic	yes	negative	not set	not set	yes	moderate	75%-25%	cytoplasmic	yes	moderate	<25%	cytoplasmic
ENSG00000165025	CAB007773	yes	strong	<25%	cytoplasmic	yes	negative	not set	not set	yes	negative	not set	not set	yes	negative	not set	not set	yes	negative	not set	not set	yes	negative	not set	not set	yes	moderate	>75%	cytoplasmic	yes	negative	not set	not set
ENSG00000104812	CAB007793	yes	strong	>75%	cytoplasmic	yes	negative	not set	not set	yes	negative	not set	not set	yes	negative	not set	not set	yes	negative	not set	not set	yes	negative	not set	not set	yes	moderate	75%-25%	cytoplasmic	yes	negative	not set	not set
ENSG00000175305	CAB007825	yes	weak	<25%	cytoplasmic	yes	negative	not set	not set	yes	moderate	<25%	nuclear	yes	negative	not set	not set	yes	strong	<25%	nuclear	yes	negative	not set	not set	yes	negative	not set	not set	yes	negative	not set	not set
ENSG00000182054	HPA007831	yes	moderate	<25%	cytoplasmic	yes	negative	not set	not set	yes	negative	not set	not set	yes	negative	not set	not set	yes	negative	not set	not set	yes	negative	not set	not set	yes	negative	not set	not set	yes	strong	>75%	cytoplasmic
ENSG00000060339	HPA007856	yes	strong	>75%	nuclear	yes	negative	not set	not set	yes	strong	>75%	nuclear	yes	strong	>75%	nuclear	yes	strong	>75%	nuclear	yes	strong	>75%	nuclear	yes	strong	>75%	nuclear	yes	strong	>75%	nuclear
ENSG00000243927	HPA007861	yes	moderate	>75%	cytoplasmic,nuclear	yes	moderate	>75%	cytoplasmic	yes	moderate	>75%	cytoplasmic	yes	moderate	75%-25%	cytoplasmic	yes	moderate	>75%	cytoplasmic	yes	moderate	>75%	cytoplasmic	yes	moderate	>75%	cytoplasmic,nuclear	yes	strong	>75%	cytoplasmic
ENSG00000167972	HPA007884	yes	negative	not set	not set	yes	weak	<25%	cytoplasmic	yes	negative	not set	not set	yes	negative	not set	not set	yes	moderate	<25%	cytoplasmic	yes	moderate	<25%	cytoplasmic	yes	negative	not set	not set	yes	negative	not set	not set
ENSG00000111801	HPA007904	yes	moderate	>75%	cytoplasmic	yes	negative	not set	not set	yes	strong	75%-25%	nuclear	yes	negative	not set	not set	yes	negative	not set	not set	yes	negative	not set	not set	yes	negative	not set	not set	yes	negative	not set	not set
ENSG00000197694	HPA007927	yes	moderate	75%-25%	cytoplasmic	yes	negative	not set	not set	yes	strong	75%-25%	cytoplasmic	yes	strong	75%-25%	cytoplasmic	yes	negative	not set	not set	yes	negative	not set	not set	yes	strong	75%-25%	cytoplasmic	yes	negative	not set	not set
ENSG00000134058	HPA007932	yes	weak	75%-25%	cytoplasmic	yes	negative	not set	not set	yes	moderate	75%-25%	nuclear	yes	negative	not set	not set	yes	moderate	75%-25%	nuclear	yes	moderate	<25%	nuclear	yes	weak	75%-25%	nuclear	yes	strong	>75%	nuclear
ENSG00000111261	HPA007955	yes	moderate	<25%	cytoplasmic	yes	negative	not set	not set	yes	moderate	75%-25%	cytoplasmic	yes	negative	not set	not set	yes	negative	not set	not set	yes	negative	not set	not set	yes	negative	not set	not set	yes	negative	not set	not set
ENSG00000117676	HPA007981	yes	weak	<25%	cytoplasmic	yes	negative	not set	not set	yes	negative	not set	not set	yes	negative	not set	not set	yes	moderate	<25%	nuclear	yes	moderate	<25%	nuclear	yes	negative	not set	not set	yes	moderate	<25%	nuclear
ENSG00000122034	HPA007990	yes	negative	not set	not set	yes	strong	<25%	nuclear	yes	moderate	75%-25%	nuclear	yes	moderate	<25%	nuclear	yes	moderate	<25%	nuclear	yes	moderate	<25%	nuclear	yes	moderate	75%-25%	nuclear	yes	moderate	75%-25%	nuclear
ENSG00000140740	HPA007998	yes	moderate	>75%	cytoplasmic	yes	moderate	>75%	cytoplasmic,membrane	yes	moderate	75%-25%	cytoplasmic	yes	negative	not set	not set	yes	negative	not set	not set	yes	moderate	75%-25%	cytoplasmic	yes	negative	not set	not set	yes	moderate	>75%	cytoplasmic
ENSG00000163956	HPA008001	yes	moderate	>75%	cytoplasmic	yes	negative	not set	not set	yes	strong	75%-25%	cytoplasmic	yes	negative	not set	not set	yes	strong	<25%	cytoplasmic	yes	moderate	75%-25%	cytoplasmic	yes	negative	not set	not set	yes	strong	<25%	cytoplasmic
ENSG00000113734	HPA008009	yes	weak	>75%	cytoplasmic	yes	negative	not set	not set	yes	negative	not set	not set	yes	negative	not set	not set	yes	negative	not set	not set	yes	moderate	75%-25%	cytoplasmic	yes	negative	not set	not set	yes	negative	not set	not set
ENSG00000107819	HPA008028	yes	strong	>75%	cytoplasmic	yes	negative	not set	not set	yes	negative	not set	not set	yes	negative	not set	not set	yes	negative	not set	not set	yes	negative	not set	not set	yes	strong	>75%	cytoplasmic	yes	negative	not set	not set
ENSG00000167258	HPA008038	yes	strong	75%-25%	nuclear	yes	negative	not set	not set	yes	strong	>75%	nuclear	yes	moderate	75%-25%	nuclear	yes	strong	75%-25%	nuclear	yes	strong	>75%	nuclear	yes	strong	75%-25%	nuclear	yes	strong	>75%	nuclear
ENSG00000148798	HPA008057	yes	strong	>75%	cytoplasmic	yes	negative	not set	not set	yes	negative	not set	not set	yes	negative	not set	not set	yes	negative	not set	not set	yes	negative	not set	not set	yes	moderate	>75%	cytoplasmic	yes	strong	75%-25%	cytoplasmic
ENSG00000196743	HPA008063	yes	strong	>75%	cytoplasmic	yes	negative	not set	not set	yes	negative	not set	not set	yes	negative	not set	not set	yes	negative	not set	not set	yes	negative	not set	not set	yes	moderate	75%-25%	cytoplasmic	yes	negative	not set	not set
ENSG00000196878	HPA008069	yes	moderate	>75%	cytoplasmic	yes	negative	not set	not set	yes	negative	not set	not set	yes	negative	not set	not set	yes	negative	not set	not set	yes	moderate	75%-25%	nuclear	yes	negative	not set	not set	yes	negative	not set	not set
ENSG00000187678	CAB008086	yes	strong	75%-25%	cytoplasmic	yes	negative	not set	not set	yes	negative	not set	not set	yes	negative	not set	not set	yes	negative	not set	not set	yes	negative	not set	not set	yes	strong	75%-25%	cytoplasmic	yes	negative	not set	not set
ENSG00000142273	CAB008087	yes	strong	>75%	cytoplasmic	yes	negative	not set	not set	yes	negative	not set	not set	yes	negative	not set	not set	yes	moderate	<25%	cytoplasmic	yes	negative	not set	not set	yes	negative	not set	not set	yes	strong	<25%	cytoplasmic
ENSG00000116670	CAB008110	yes	strong	>75%	cytoplasmic	yes	negative	not set	not set	yes	negative	not set	not set	yes	strong	>75%	cytoplasmic	yes	negative	not set	not set	yes	negative	not set	not set	yes	strong	>75%	cytoplasmic	yes	negative	not set	not set
ENSG00000148400	CAB008112	yes	moderate	>75%	cytoplasmic,nuclear	yes	moderate	>75%	cytoplasmic	yes	moderate	>75%	nuclear	yes	negative	not set	not set	yes	moderate	>75%	nuclear	yes	moderate	>75%	nuclear	yes	weak	>75%	cytoplasmic,nuclear	yes	strong	75%-25%	cytoplasmic,nuclear
ENSG00000104332	CAB008116	yes	weak	75%-25%	cytoplasmic	yes	weak	>75%	cytoplasmic	yes	strong	>75%	cytoplasmic	yes	negative	not set	not set	yes	weak	<25%	cytoplasmic	yes	moderate	75%-25%	cytoplasmic	yes	negative	not set	not set	yes	weak	<25%	cytoplasmic
ENSG00000140382	HPA008126	yes	moderate	>75%	nuclear	yes	negative	not set	not set	yes	strong	>75%	nuclear	yes	strong	<25%	nuclear	yes	strong	>75%	nuclear	yes	moderate	75%-25%	nuclear	yes	negative	not set	not set	yes	strong	>75%	nuclear
ENSG00000147416	HPA008147	yes	strong	75%-25%	cytoplasmic	yes	negative	not set	not set	yes	negative	not set	not set	yes	negative	not set	not set	yes	negative	not set	not set	yes	negative	not set	not set	yes	moderate	75%-25%	cytoplasmic	yes	negative	not set	not set
ENSG00000038382	HPA008157	yes	weak	>75%	cytoplasmic	yes	moderate	75%-25%	cytoplasmic	yes	negative	not set	not set	yes	negative	not set	not set	yes	negative	not set	not set	yes	moderate	75%-25%	cytoplasmic	yes	weak	>75%	cytoplasmic	yes	strong	>75%	cytoplasmic
ENSG00000182704	HPA008164	yes	moderate	>75%	cytoplasmic	yes	weak	75%-25%	cytoplasmic	yes	negative	not set	not set	yes	negative	not set	not set	yes	negative	not set	not set	yes	negative	not set	not set	yes	negative	not set	not set	yes	moderate	>75%	cytoplasmic
ENSG00000110852	HPA008194	yes	moderate	<25%	cytoplasmic	yes	negative	not set	not set	yes	negative	not set	not set	yes	negative	not set	not set	yes	negative	not set	not set	yes	negative	not set	not set	yes	strong	>75%	cytoplasmic	yes	negative	not set	not set
ENSG00000126861	HPA008206	yes	negative	not set	not set	yes	moderate	75%-25%	cytoplasmic,membrane	yes	moderate	75%-25%	membrane	yes	negative	not set	not set	yes	negative	not set	not set	yes	negative	not set	not set	yes	negative	not set	not set	yes	negative	not set	not set
ENSG00000105655	HPA008232	yes	negative	not set	not set	yes	strong	>75%	cytoplasmic,membrane	yes	strong	>75%	cytoplasmic,membrane	yes	negative	not set	not set	yes	strong	>75%	cytoplasmic,membrane	yes	strong	>75%	cytoplasmic,membrane	yes	strong	>75%	cytoplasmic,membrane	yes	strong	>75%	cytoplasmic,membrane
ENSG00000172939	HPA008237	yes	weak	>75%	cytoplasmic	yes	weak	>75%	cytoplasmic	yes	negative	not set	not set	yes	negative	not set	not set	yes	strong	>75%	cytoplasmic	yes	negative	not set	not set	yes	weak	>75%	cytoplasmic	yes	strong	>75%	cytoplasmic
ENSG00000147316	HPA008238	yes	weak	75%-25%	cytoplasmic,membrane	yes	weak	>75%	cytoplasmic,membrane	yes	moderate	>75%	nuclear	yes	negative	not set	not set	yes	strong	>75%		yes	moderate	75%-25%	nuclear	yes	weak	>75%	cytoplasmic,membrane	yes	strong	>75%
ENSG00000082212	HPA008247	yes	strong	75%-25%	cytoplasmic	yes	negative	not set	not set	yes	strong	75%-25%	cytoplasmic	yes	negative	not set	not set	yes	strong	<25%	cytoplasmic	yes	negative	not set	not set	yes	moderate	>75%	cytoplasmic	yes	strong	75%-25%	cytoplasmic
ENSG00000069702	HPA008257	yes	strong	>75%	membrane	yes	negative	not set	not set	yes	negative	not set	not set	yes	negative	not set	not set	yes	negative	not set	not set	yes	negative	not set	not set	yes	weak	75%-25%	cytoplasmic	yes	negative	not set	not set
ENSG00000198912	HPA008270	yes	moderate	75%-25%	nuclear	yes	negative	not set	not set	yes	weak	<25%	nuclear	yes	negative	not set	not set	yes	moderate	>75%	nuclear	yes	moderate	75%-25%	nuclear	yes	negative	not set	not set	yes	negative	not set	not set
ENSG00000078018	HPA008273	yes	negative	not set	not set	yes	weak	75%-25%	cytoplasmic,membrane	yes	negative	not set	not set	yes	negative	not set	not set	yes	moderate	75%-25%	cytoplasmic,membrane	yes	negative	not set	not set	yes	negative	not set	not set	yes	moderate	75%-25%	cytoplasmic,membrane
ENSG00000005882	HPA008287	yes	strong	<25%	cytoplasmic	yes	moderate	<25%	cytoplasmic	yes	moderate	<25%	cytoplasmic	yes	negative	not set	not set	yes	negative	not set	not set	yes	moderate	75%-25%	cytoplasmic	yes	moderate	75%-25%	cytoplasmic	yes	strong	75%-25%	cytoplasmic
ENSG00000118705	HPA008297	yes	strong	>75%	cytoplasmic	yes	negative	not set	not set	yes	negative	not set	not set	yes	negative	not set	not set	yes	negative	not set	not set	yes	negative	not set	not set	yes	strong	>75%	cytoplasmic	yes	negative	not set	not set
ENSG00000140464	HPA008312	yes	strong	>75%	cytoplasmic,nuclear	yes	strong	75%-25%	nuclear	yes	negative	not set	not set	yes	negative	not set	not set	yes	negative	not set	not set	yes	negative	not set	not set	yes	strong	>75%	cytoplasmic	yes	negative	not set	not set
ENSG00000171262	HPA008320	yes	strong	>75%	nuclear	yes	negative	not set	not set	yes	strong	75%-25%	nuclear	yes	moderate	75%-25%	nuclear	yes	strong	75%-25%	nuclear	yes	strong	75%-25%	nuclear	yes	negative	not set	not set	yes	strong	75%-25%	nuclear
ENSG00000059573	HPA008333	yes	negative	not set	not set	yes	negative	not set	not set	yes	negative	not set	not set	yes	negative	not set	not set	yes	moderate	75%-25%	cytoplasmic	yes	strong	<25%	nuclear	yes	negative	not set	not set	yes	strong	>75%	cytoplasmic
ENSG00000164828	HPA008346	yes	negative	not set	not set	yes	negative	not set	not set	yes	moderate	<25%	membrane,nuclear	yes	strong	>75%	membrane,nuclear	yes	moderate	<25%	membrane,nuclear	yes	negative	not set	not set	yes	moderate	75%-25%	membrane,nuclear	yes	strong	<25%	membrane,nuclear
ENSG00000115163	CAB008371	yes	moderate	<25%	nuclear	yes	negative	not set	not set	yes	moderate	>75%	nuclear	yes	negative	not set	not set	yes	moderate	>75%	nuclear	yes	moderate	>75%	nuclear	yes	negative	not set	not set	yes	moderate	>75%	nuclear
ENSG00000164305	CAB008381	yes	moderate	75%-25%	cytoplasmic	yes	negative	not set	not set	yes	negative	not set	not set	yes	negative	not set	not set	yes	moderate	75%-25%	nuclear	yes	negative	not set	not set	yes	negative	not set	not set	yes	moderate	75%-25%	nuclear
ENSG00000087258	CAB008387	yes	moderate	>75%	cytoplasmic,membrane	yes	weak	75%-25%	cytoplasmic,membrane	yes	negative	not set	not set	yes	negative	not set	not set	yes	moderate	75%-25%		yes	negative	not set	not set	yes	negative	not set	not set	yes	moderate	75%-25%
ENSG00000131467	CAB008388	yes	strong	>75%	nuclear	yes	negative	not set	not set	yes	strong	>75%	nuclear	yes	strong	>75%	nuclear	yes	strong	>75%	nuclear	yes	strong	>75%	nuclear	yes	strong	>75%	nuclear	yes	strong	>75%	nuclear
ENSG00000136108	HPA008410	yes	weak	<25%	cytoplasmic	yes	negative	not set	not set	yes	strong	>75%	cytoplasmic,membrane	yes	negative	not set	not set	yes	weak	>75%	cytoplasmic,membrane	yes	strong	<25%	nuclear	yes	negative	not set	not set	yes	negative	not set	not set
ENSG00000077150	HPA008422	yes	weak	75%-25%	cytoplasmic	yes	negative	not set	not set	yes	negative	not set	not set	yes	negative	not set	not set	yes	negative	not set	not set	yes	negative	not set	not set	yes	moderate	>75%	cytoplasmic	yes	strong	75%-25%	cytoplasmic
ENSG00000166598	HPA008424	yes	negative	not set	not set	yes	negative	not set	not set	yes	strong	<25%	cytoplasmic	yes	negative	not set	not set	yes	negative	not set	not set	yes	moderate	75%-25%	cytoplasmic	yes	negative	not set	not set	yes	strong	75%-25%	cytoplasmic
ENSG00000125779	HPA008440	yes	moderate	>75%	cytoplasmic,membrane	yes	weak	>75%	cytoplasmic,membrane	yes	weak	>75%	cytoplasmic,membrane	yes	negative	not set	not set	yes	negative	not set	not set	yes	strong	>75%	nuclear	yes	negative	not set	not set	yes	moderate	<25%	cytoplasmic,membrane
ENSG00000164828	HPA008461	yes	strong	>75%	membrane,nuclear	yes	negative	not set	not set	yes	strong	75%-25%	membrane,nuclear	yes	strong	>75%	membrane,nuclear	yes	moderate	<25%	membrane,nuclear	yes	strong	75%-25%	nuclear	yes	strong	>75%	membrane,nuclear	yes	strong	<25%	membrane,nuclear
ENSG00000007038	HPA008477	yes	weak	>75%	cytoplasmic	yes	moderate	>75%	cytoplasmic,membrane	yes	strong	>75%	cytoplasmic,membrane	yes	negative	not set	not set	yes	weak	>75%	cytoplasmic,membrane	yes	strong	>75%	cytoplasmic,membrane	yes	negative	not set	not set	yes	negative	not set	not set
ENSG00000171262	HPA008502	yes	moderate	75%-25%	nuclear	yes	negative	not set	not set	yes	strong	75%-25%	nuclear	yes	moderate	75%-25%	nuclear	yes	moderate	75%-25%	nuclear	yes	strong	75%-25%	nuclear	yes	negative	not set	not set	yes	strong	>75%	nuclear
ENSG00000177868	HPA008507	yes	strong	<25%	nuclear	yes	negative	not set	not set	yes	weak	>75%	cytoplasmic	yes	negative	not set	not set	yes	strong	75%-25%	nuclear	yes	strong	>75%	cytoplasmic	yes	negative	not set	not set	yes	strong	75%-25%	nuclear
ENSG00000120656	HPA008519	yes	moderate	75%-25%	cytoplasmic,nuclear	yes	negative	not set	not set	yes	negative	not set	not set	yes	negative	not set	not set	yes	moderate	75%-25%	cytoplasmic	yes	negative	not set	not set	yes	negative	not set	not set	yes	moderate	<25%	cytoplasmic
ENSG00000186198	HPA008533	yes	weak	>75%	cytoplasmic	yes	negative	not set	not set	yes	negative	not set	not set	yes	negative	not set	not set	yes	negative	not set	not set	yes	negative	not set	not set	yes	negative	not set	not set	yes	strong	>75%	cytoplasmic
ENSG00000127914	HPA008548	yes	moderate	>75%	cytoplasmic	yes	moderate	>75%	cytoplasmic	yes	moderate	>75%	cytoplasmic	yes	moderate	75%-25%	cytoplasmic	yes	moderate	>75%	cytoplasmic	yes	moderate	>75%	cytoplasmic	yes	moderate	>75%	cytoplasmic	yes	strong	>75%	cytoplasmic
ENSG00000133067	HPA008556	yes	weak	<25%	cytoplasmic	yes	negative	not set	not set	yes	negative	not set	not set	yes	negative	not set	not set	yes	negative	not set	not set	yes	negative	not set	not set	yes	moderate	75%-25%	cytoplasmic,membrane	yes	negative	not set	not set
ENSG00000103742	HPA008576	yes	weak	>75%	cytoplasmic	yes	strong	>75%	cytoplasmic	yes	strong	>75%	cytoplasmic	yes	negative	not set	not set	yes	strong	<25%	cytoplasmic	yes	strong	>75%	cytoplasmic	yes	negative	not set	not set	yes	strong	75%-25%	cytoplasmic
ENSG00000123609	HPA008588	yes	negative	not set	not set	yes	negative	not set	not set	yes	negative	not set	not set	yes	negative	not set	not set	yes	moderate	rare	nuclear	yes	negative	not set	not set	yes	moderate	rare	cytoplasmic	yes	moderate	rare	nuclear
ENSG00000167468	CAB008630	yes	weak	<25%	nuclear	yes	moderate	75%-25%	cytoplasmic	yes	strong	<25%	cytoplasmic	yes	negative	not set	not set	yes	negative	not set	not set	yes	strong	75%-25%	cytoplasmic	yes	negative	not set	not set	yes	negative	not set	not set
ENSG00000165672	CAB008656	yes	strong	>75%	cytoplasmic	yes	negative	not set	not set	yes	negative	not set	not set	yes	negative	not set	not set	yes	negative	not set	not set	yes	negative	not set	not set	yes	moderate	>75%	cytoplasmic	yes	moderate	75%-25%	cytoplasmic
ENSG00000117592	CAB008663	yes	moderate	>75%	cytoplasmic	yes	negative	not set	not set	yes	negative	not set	not set	yes	negative	not set	not set	yes	negative	not set	not set	yes	negative	not set	not set	yes	moderate	>75%	cytoplasmic	yes	negative	not set	not set
ENSG00000134318	CAB008666	yes	strong	>75%	cytoplasmic	yes	negative	not set	not set	yes	negative	not set	not set	yes	negative	not set	not set	yes	negative	not set	not set	yes	negative	not set	not set	yes	strong	75%-25%	cytoplasmic	yes	negative	not set	not set
ENSG00000121057	HPA008691	yes	moderate	>75%	cytoplasmic	yes	strong	75%-25%	cytoplasmic	yes	negative	not set	not set	yes	negative	not set	not set	yes	negative	not set	not set	yes	negative	not set	not set	yes	weak	75%-25%	cytoplasmic	yes	negative	not set	not set
ENSG00000107882	HPA008700	yes	moderate	75%-25%	nuclear	yes	negative	not set	not set	yes	moderate	75%-25%	nuclear	yes	negative	not set	not set	yes	moderate	<25%	nuclear	yes	strong	75%-25%	nuclear	yes	moderate	<25%	nuclear	yes	strong	>75%	nuclear
ENSG00000204227	HPA008701	yes	weak	75%-25%	cytoplasmic,nuclear	yes	negative	not set	not set	yes	moderate	75%-25%	nuclear	yes	moderate	>75%	cytoplasmic	yes	strong	75%-25%	nuclear	yes	moderate	75%-25%	nuclear	yes	moderate	>75%	nuclear	yes	strong	75%-25%	nuclear
ENSG00000079150	HPA008707	yes	negative	not set	not set	yes	negative	not set	not set	yes	negative	not set	not set	yes	negative	not set	not set	yes	negative	not set	not set	yes	negative	not set	not set	yes	strong	<25%	cytoplasmic	yes	negative	not set	not set
ENSG00000131503,ENSG00000254996	HPA008718	yes	moderate	>75%	cytoplasmic,membrane	yes	moderate	>75%	cytoplasmic,membrane	yes	strong	>75%	cytoplasmic,membrane	yes	negative	not set	not set	yes	strong	>75%	cytoplasmic,membrane	yes	moderate	>75%	cytoplasmic,membrane	yes	negative	not set	not set	yes	strong	75%-25%	cytoplasmic,membrane
ENSG00000109321	HPA008720	yes	negative	not set	not set	yes	moderate	<25%	cytoplasmic	yes	negative	not set	not set	yes	negative	not set	not set	yes	moderate	<25%	nuclear	yes	negative	not set	not set	yes	negative	not set	not set	yes	moderate	<25%	cytoplasmic
ENSG00000065970	HPA008723	yes	negative	not set	not set	yes	moderate	<25%	cytoplasmic	yes	negative	not set	not set	yes	strong	<25%	nuclear	yes	negative	not set	not set	yes	negative	not set	not set	yes	negative	not set	not set	yes	strong	<25%	nuclear
ENSG00000144747	HPA008729	yes	strong	75%-25%	cytoplasmic	yes	strong	>75%	cytoplasmic	yes	strong	<25%	cytoplasmic	yes	negative	not set	not set	yes	negative	not set	not set	yes	strong	>75%	cytoplasmic	yes	negative	not set	not set	yes	negative	not set	not set
ENSG00000069011	HPA008743	yes	weak	<25%	cytoplasmic	yes	negative	not set	not set	yes	negative	not set	not set	yes	negative	not set	not set	yes	negative	not set	not set	yes	negative	not set	not set	yes	weak	<25%	cytoplasmic	yes	negative	not set	not set
ENSG00000153147	HPA008751	yes	negative	not set	not set	yes	negative	not set	not set	yes	strong	75%-25%	nuclear	yes	negative	not set	not set	yes	moderate	75%-25%	nuclear	yes	strong	>75%	nuclear	yes	negative	not set	not set	yes	strong	>75%	nuclear
ENSG00000070950	HPA008752	yes	moderate	>75%	cytoplasmic	yes	negative	not set	not set	yes	negative	not set	not set	yes	negative	not set	not set	yes	strong	75%-25%	cytoplasmic,nuclear	yes	negative	not set	not set	yes	negative	not set	not set	yes	strong	<25%	cytoplasmic,nuclear
ENSG00000137492	HPA008758	yes	moderate	75%-25%	cytoplasmic	yes	weak	>75%	cytoplasmic,membrane	yes	strong	75%-25%	nuclear	yes	negative	not set	not set	yes	strong	75%-25%	nuclear	yes	weak	>75%	nuclear	yes	negative	not set	not set	yes	strong	<25%	nuclear
ENSG00000116754	HPA008762	yes	strong	>75%	nuclear	yes	negative	not set	not set	yes	strong	75%-25%	nuclear	yes	strong	>75%	nuclear	yes	strong	75%-25%	nuclear	yes	strong	>75%	nuclear	yes	strong	75%-25%	nuclear	yes	strong	>75%	nuclear
ENSG00000074410	HPA008773	yes	negative	not set	not set	yes	strong	>75%	cytoplasmic	yes	negative	not set	not set	yes	moderate	rare	cytoplasmic	yes	negative	not set	not set	yes	negative	not set	not set	yes	negative	not set	not set	yes	negative	not set	not set
ENSG00000143442	HPA008781	yes	moderate	>75%	cytoplasmic	yes	strong	>75%	cytoplasmic	yes	negative	not set	not set	yes	negative	not set	not set	yes	negative	not set	not set	yes	strong	>75%	nuclear	yes	moderate	>75%	nuclear	yes	strong	>75%	cytoplasmic
ENSG00000101096	HPA008789	yes	weak	<25%	cytoplasmic	yes	negative	not set	not set	yes	negative	not set	not set	yes	negative	not set	not set	yes	negative	not set	not set	yes	negative	not set	not set	yes	weak	75%-25%	cytoplasmic	yes	negative	not set	not set
ENSG00000115652	HPA008825	yes	negative	not set	not set	yes	negative	not set	not set	yes	negative	not set	not set	yes	negative	not set	not set	yes	negative	not set	not set	yes	negative	not set	not set	yes	weak	75%-25%	cytoplasmic	yes	moderate	<25%	cytoplasmic
ENSG00000163531	HPA008832	yes	weak	<25%	membrane	yes	negative	not set	not set	yes	negative	not set	not set	yes	negative	not set	not set	yes	moderate	rare	cytoplasmic	yes	strong	<25%	nuclear	yes	negative	not set	not set	yes	moderate	<25%	cytoplasmic
ENSG00000110090	HPA008835	yes	strong	>75%	cytoplasmic	yes	negative	not set	not set	yes	negative	not set	not set	yes	negative	not set	not set	yes	negative	not set	not set	yes	negative	not set	not set	yes	weak	75%-25%	cytoplasmic	yes	negative	not set	not set
ENSG00000173193	HPA008846	yes	weak	75%-25%	cytoplasmic	yes	negative	not set	not set	yes	negative	not set	not set	yes	negative	not set	not set	yes	negative	not set	not set	yes	moderate	75%-25%	cytoplasmic	yes	weak	>75%	cytoplasmic	yes	negative	not set	not set
ENSG00000076706	HPA008848	yes	moderate	>75%	cytoplasmic,membrane	yes	moderate	>75%	cytoplasmic,membrane	yes	negative	not set	not set	yes	moderate	75%-25%	cytoplasmic,membrane	yes	negative	not set	not set	yes	negative	not set	not set	yes	weak	>75%	cytoplasmic,membrane	yes	negative	not set	not set
ENSG00000157456	HPA008873	yes	strong	75%-25%	cytoplasmic	yes	weak	<25%	cytoplasmic,membrane	yes	strong	>75%	cytoplasmic,membrane	yes	moderate	75%-25%	cytoplasmic,membrane	yes	moderate	75%-25%	cytoplasmic,membrane	yes	weak	<25%	cytoplasmic,membrane	yes	negative	not set	not set	yes	weak	75%-25%	cytoplasmic,membrane
ENSG00000082212	HPA008880	yes	moderate	>75%	cytoplasmic	yes	negative	not set	not set	yes	strong	<25%	cytoplasmic,membrane	yes	negative	not set	not set	yes	negative	not set	not set	yes	negative	not set	not set	yes	strong	75%-25%	cytoplasmic	yes	negative	not set	not set
ENSG00000162599	HPA008884	yes	moderate	>75%	nuclear	yes	negative	not set	not set	yes	negative	not set	not set	yes	negative	not set	not set	yes	negative	not set	not set	yes	negative	not set	not set	yes	moderate	>75%	nuclear	yes	negative	not set	not set
ENSG00000048471	HPA008889	yes	negative	not set	not set	yes	moderate	<25%	cytoplasmic	yes	negative	not set	not set	yes	negative	not set	not set	yes	moderate	<25%	nuclear	yes	negative	not set	not set	yes	negative	not set	not set	yes	strong	75%-25%	cytoplasmic
ENSG00000164611,ENSG00000250254	HPA008890	yes	weak	>75%	cytoplasmic	yes	negative	not set	not set	yes	strong	>75%	cytoplasmic	yes	negative	not set	not set	yes	moderate	<25%	cytoplasmic	yes	negative	not set	not set	yes	negative	not set	not set	yes	negative	not set	not set
ENSG00000198824	HPA008900	yes	strong	75%-25%	nuclear	yes	negative	not set	not set	yes	negative	not set	not set	yes	moderate	>75%	nuclear	yes	strong	75%-25%	nuclear	yes	negative	not set	not set	yes	strong	>75%	nuclear	yes	strong	>75%	nuclear
ENSG00000164885	CAB008909	yes	moderate	>75%	cytoplasmic,nuclear	yes	negative	not set	not set	yes	negative	not set	not set	yes	negative	not set	not set	yes	strong	75%-25%	cytoplasmic,nuclear	yes	negative	not set	not set	yes	weak	>75%	cytoplasmic	yes	strong	75%-25%	cytoplasmic,nuclear
ENSG00000186834	HPA008926	yes	strong	>75%	nuclear	yes	negative	not set	not set	yes	strong	>75%	nuclear	yes	strong	>75%	nuclear	yes	strong	>75%	nuclear	yes	moderate	75%-25%	nuclear	yes	strong	>75%	nuclear	yes	strong	>75%	nuclear
ENSG00000074356	HPA008959	yes	negative	not set	not set	yes	negative	not set	not set	yes	strong	75%-25%	nuclear	yes	moderate	<25%	nuclear	yes	strong	75%-25%	nuclear	yes	strong	75%-25%	nuclear	yes	moderate	<25%	nuclear	yes	strong	>75%	nuclear
ENSG00000136542	HPA008963	yes	negative	not set	not set	yes	negative	not set	not set	yes	weak	75%-25%	nuclear	yes	negative	not set	not set	yes	negative	not set	not set	yes	moderate	>75%	nuclear	yes	negative	not set	not set	yes	negative	not set	not set
ENSG00000136732	HPA008965	yes	weak	>75%	cytoplasmic	yes	negative	not set	not set	yes	negative	not set	not set	yes	negative	not set	not set	yes	negative	not set	not set	yes	negative	not set	not set	yes	weak	<25%	cytoplasmic	yes	strong	75%-25%	cytoplasmic
ENSG00000163001	HPA008994	yes	negative	not set	not set	yes	moderate	75%-25%	cytoplasmic	yes	moderate	<25%	cytoplasmic	yes	negative	not set	not set	yes	moderate	<25%	cytoplasmic,nuclear	yes	strong	>75%	cytoplasmic,nuclear	yes	negative	not set	not set	yes	negative	not set	not set
ENSG00000129315	CAB009016	yes	strong	>75%	nuclear	yes	negative	not set	not set	yes	negative	not set	not set	yes	negative	not set	not set	yes	negative	not set	not set	yes	moderate	>75%	nuclear	yes	moderate	>75%	nuclear	yes	negative	not set	not set
ENSG00000141644	CAB009017	yes	weak	>75%	cytoplasmic	yes	negative	not set	not set	yes	weak	<25%	nuclear	yes	negative	not set	not set	yes	negative	not set	not set	yes	moderate	<25%	nuclear	yes	negative	not set	not set	yes	moderate	<25%	nuclear
ENSG00000125844	HPA009026	yes	strong	>75%	cytoplasmic	yes	negative	not set	not set	yes	negative	not set	not set	yes	negative	not set	not set	yes	negative	not set	not set	yes	negative	not set	not set	yes	moderate	<25%	cytoplasmic	yes	strong	<25%	cytoplasmic
ENSG00000166747	CAB009049	yes	strong	>75%	cytoplasmic	yes	weak	75%-25%	cytoplasmic	yes	strong	75%-25%	cytoplasmic,membrane	yes	negative	not set	not set	yes	strong	<25%	cytoplasmic,membrane	yes	negative	not set	not set	yes	moderate	>75%	cytoplasmic	yes	strong	>75%	cytoplasmic,membrane
ENSG00000213762	HPA009064	yes	moderate	75%-25%		yes	negative	not set	not set	yes	negative	not set	not set	yes	negative	not set	not set	yes	strong	75%-25%	nuclear	yes	negative	not set	not set	yes	moderate	75%-25%	nuclear	yes	moderate	75%-25%	nuclear
ENSG00000171056,ENSG00000258724	HPA009065	yes	moderate	>75%	nuclear	yes	weak	>75%	cytoplasmic,membrane	yes	weak	75%-25%	nuclear	yes	negative	not set	not set	yes	moderate	75%-25%	nuclear	yes	weak	75%-25%	nuclear	yes	weak	>75%	nuclear	yes	moderate	75%-25%	nuclear
ENSG00000181409	HPA009073	yes	moderate	75%-25%	cytoplasmic	yes	negative	not set	not set	yes	strong	75%-25%	cytoplasmic	yes	negative	not set	not set	yes	negative	not set	not set	yes	strong	75%-25%	cytoplasmic	yes	negative	not set	not set	yes	negative	not set	not set
ENSG00000121940	HPA009087	yes	strong	75%-25%	cytoplasmic	yes	negative	not set	not set	yes	negative	not set	not set	yes	negative	not set	not set	yes	negative	not set	not set	yes	negative	not set	not set	yes	moderate	75%-25%	cytoplasmic	yes	negative	not set	not set
ENSG00000065150	CAB009110	yes	moderate	75%-25%	cytoplasmic	yes	strong	>75%	cytoplasmic,nuclear	yes	strong	75%-25%	cytoplasmic,nuclear	yes	negative	not set	not set	yes	strong	75%-25%	cytoplasmic	yes	strong	>75%	cytoplasmic,nuclear	yes	moderate	>75%	cytoplasmic	yes	strong	75%-25%	cytoplasmic
ENSG00000004660	CAB009111	yes	weak	<25%	cytoplasmic	yes	negative	not set	not set	yes	negative	not set	not set	yes	negative	not set	not set	yes	negative	not set	not set	yes	negative	not set	not set	yes	negative	not set	not set	yes	moderate	<25%	cytoplasmic
ENSG00000151623	CAB009155	yes	strong	>75%	cytoplasmic	yes	moderate	>75%	cytoplasmic	yes	moderate	>75%	cytoplasmic	yes	negative	not set	not set	yes	strong	>75%	cytoplasmic	yes	moderate	>75%	cytoplasmic	yes	moderate	>75%	cytoplasmic	yes	strong	>75%	cytoplasmic
ENSG00000099956	CAB009196	yes	moderate	>75%	cytoplasmic	yes	negative	not set	not set	yes	negative	not set	not set	yes	negative	not set	not set	yes	moderate	<25%	nuclear	yes	negative	not set	not set	yes	moderate	<25%	nuclear	yes	strong	<25%	nuclear
ENSG00000101966	CAB009203	yes	moderate	75%-25%	cytoplasmic	yes	moderate	75%-25%	cytoplasmic,membrane	yes	negative	not set	not set	yes	negative	not set	not set	yes	negative	not set	not set	yes	negative	not set	not set	yes	negative	not set	not set	yes	strong	>75%	cytoplasmic,membrane
ENSG00000119139	CAB009228	yes	negative	not set	not set	yes	negative	not set	not set	yes	negative	not set	not set	yes	negative	not set	not set	yes	negative	not set	not set	yes	negative	not set	not set	yes	strong	<25%	membrane	yes	strong	<25%	cytoplasmic
ENSG00000107902	HPA009269	yes	weak	75%-25%	cytoplasmic	yes	weak	>75%	cytoplasmic	yes	negative	not set	not set	yes	negative	not set	not set	yes	negative	not set	not set	yes	negative	not set	not set	yes	weak	75%-25%	cytoplasmic	yes	moderate	<25%	cytoplasmic
ENSG00000153071	CAB009314	yes	weak	<25%	cytoplasmic	yes	negative	not set	not set	yes	moderate	>75%	cytoplasmic	yes	negative	not set	not set	yes	negative	not set	not set	yes	moderate	>75%	cytoplasmic	yes	negative	not set	not set	yes	negative	not set	not set
ENSG00000104368	CAB009335	yes	moderate	75%-25%	cytoplasmic	yes	weak	<25%	cytoplasmic	yes	negative	not set	not set	yes	negative	not set	not set	yes	negative	not set	not set	yes	negative	not set	not set	yes	negative	not set	not set	yes	strong	>75%	cytoplasmic
ENSG00000101367	CAB009337	yes	moderate	75%-25%	cytoplasmic	yes	negative	not set	not set	yes	negative	not set	not set	yes	negative	not set	not set	yes	negative	not set	not set	yes	negative	not set	not set	yes	strong	>75%	cytoplasmic	yes	strong	<25%	cytoplasmic
ENSG00000205571	CAB009344	yes	negative	not set	not set	yes	strong	75%-25%	cytoplasmic	yes	strong	75%-25%	cytoplasmic,nuclear	yes	negative	not set	not set	yes	negative	not set	not set	yes	strong	>75%	cytoplasmic,nuclear	yes	negative	not set	not set	yes	moderate	<25%	cytoplasmic,nuclear
ENSG00000125266	CAB009368	yes	weak	75%-25%	cytoplasmic	yes	moderate	>75%	cytoplasmic	yes	negative	not set	not set	yes	negative	not set	not set	yes	strong	75%-25%	nuclear	yes	moderate	75%-25%	nuclear	yes	weak	>75%	cytoplasmic	yes	moderate	<25%	nuclear
ENSG00000085224	CAB009372	yes	strong	>75%	nuclear	yes	negative	not set	not set	yes	negative	not set	not set	yes	strong	>75%	nuclear	yes	negative	not set	not set	yes	negative	not set	not set	yes	strong	>75%	nuclear	yes	negative	not set	not set
ENSG00000144935	CAB009387	yes	moderate	>75%	cytoplasmic	yes	strong	>75%	cytoplasmic	yes	moderate	75%-25%	cytoplasmic	yes	negative	not set	not set	yes	moderate	>75%	cytoplasmic	yes	moderate	75%-25%	cytoplasmic	yes	moderate	>75%	cytoplasmic	yes	strong	>75%	cytoplasmic
ENSG00000100811	CAB009392	yes	moderate	75%-25%	cytoplasmic,nuclear	yes	negative	not set	not set	yes	moderate	75%-25%	nuclear	yes	negative	not set	not set	yes	moderate	75%-25%	nuclear	yes	negative	not set	not set	yes	moderate	75%-25%	nuclear	yes	moderate	75%-25%	nuclear
ENSG00000104331	HPA009411	yes	strong	>75%	cytoplasmic	yes	negative	not set	not set	yes	moderate	75%-25%	cytoplasmic	yes	negative	not set	not set	yes	moderate	75%-25%	cytoplasmic	yes	moderate	75%-25%	cytoplasmic	yes	negative	not set	not set	yes	moderate	75%-25%	cytoplasmic
ENSG00000015413	HPA009426	yes	moderate	>75%	cytoplasmic,membrane	yes	negative	not set	not set	yes	moderate	75%-25%	nuclear	yes	moderate	>75%	cytoplasmic,membrane	yes	negative	not set	not set	yes	strong	75%-25%	nuclear	yes	weak	75%-25%	nuclear	yes	negative	not set	not set
ENSG00000118520	CAB009434	yes	weak	75%-25%	cytoplasmic,membrane	yes	weak	>75%	cytoplasmic,membrane	yes	negative	not set	not set	yes	negative	not set	not set	yes	moderate	75%-25%	nuclear	yes	negative	not set	not set	yes	negative	not set	not set	yes	moderate	75%-25%	nuclear
ENSG00000011600	CAB009493	yes	negative	not set	not set	yes	moderate	<25%	cytoplasmic,membrane	yes	negative	not set	not set	yes	negative	not set	not set	yes	negative	not set	not set	yes	negative	not set	not set	yes	moderate	<25%	cytoplasmic,membrane	yes	negative	not set	not set
ENSG00000178607	CAB009495	yes	strong	>75%	cytoplasmic	yes	negative	not set	not set	yes	negative	not set	not set	yes	negative	not set	not set	yes	negative	not set	not set	yes	negative	not set	not set	yes	weak	75%-25%	cytoplasmic	yes	negative	not set	not set
ENSG00000140564	CAB009499	yes	moderate	75%-25%	nuclear	yes	weak	75%-25%	cytoplasmic,membrane	yes	negative	not set	not set	yes	negative	not set	not set	yes	negative	not set	not set	yes	moderate	75%-25%	nuclear	yes	negative	not set	not set	yes	moderate	75%-25%	nuclear
ENSG00000081248	CAB009507	yes	negative	not set	not set	yes	negative	not set	not set	yes	negative	not set	not set	yes	negative	not set	not set	yes	moderate	75%-25%	cytoplasmic,membrane	yes	negative	not set	not set	yes	negative	not set	not set	yes	moderate	75%-25%	cytoplasmic,membrane
ENSG00000035928	CAB009520	yes	weak	>75%	cytoplasmic	yes	moderate	>75%	cytoplasmic,membrane	yes	negative	not set	not set	yes	negative	not set	not set	yes	strong	75%-25%	nuclear	yes	moderate	75%-25%	nuclear	yes	negative	not set	not set	yes	strong	<25%	nuclear
ENSG00000106462	CAB009589	yes	negative	not set	not set	yes	moderate	75%-25%	nuclear	yes	strong	>75%	nuclear	yes	negative	not set	not set	yes	strong	>75%	nuclear	yes	strong	>75%	nuclear	yes	negative	not set	not set	yes	strong	>75%	nuclear
ENSG00000187626,ENSG00000189298	HPA009637	yes	moderate	75%-25%	cytoplasmic,nuclear	yes	negative	not set	not set	yes	weak	75%-25%	nuclear	yes	negative	not set	not set	yes	strong	<25%	nuclear	yes	negative	not set	not set	yes	negative	not set	not set	yes	strong	75%-25%	nuclear
ENSG00000197043	HPA009650	yes	strong	75%-25%	membrane	yes	negative	not set	not set	yes	negative	not set	not set	yes	negative	not set	not set	yes	negative	not set	not set	yes	negative	not set	not set	yes	strong	75%-25%	membrane	yes	negative	not set	not set
ENSG00000124570	HPA009668	yes	strong	>75%	cytoplasmic	yes	negative	not set	not set	yes	negative	not set	not set	yes	negative	not set	not set	yes	negative	not set	not set	yes	moderate	75%-25%	nuclear	yes	moderate	>75%	cytoplasmic	yes	negative	not set	not set
ENSG00000109062	HPA009672	yes	negative	not set	not set	yes	negative	not set	not set	yes	negative	not set	not set	yes	negative	not set	not set	yes	moderate	>75%	cytoplasmic	yes	negative	not set	not set	yes	negative	not set	not set	yes	moderate	>75%	cytoplasmic
ENSG00000166199	HPA009674	yes	moderate	>75%	cytoplasmic	yes	weak	75%-25%	cytoplasmic	yes	weak	75%-25%	cytoplasmic	yes	negative	not set	not set	yes	weak	75%-25%	cytoplasmic	yes	weak	75%-25%	cytoplasmic	yes	negative	not set	not set	yes	weak	75%-25%	cytoplasmic
ENSG00000131507	HPA009682	yes	strong	>75%	cytoplasmic	yes	negative	not set	not set	yes	negative	not set	not set	yes	negative	not set	not set	yes	negative	not set	not set	yes	negative	not set	not set	yes	strong	75%-25%	nuclear	yes	moderate	<25%	nuclear
ENSG00000106483	HPA009712	yes	negative	not set	not set	yes	weak	75%-25%	cytoplasmic,membrane	yes	moderate	75%-25%	cytoplasmic,membrane	yes	negative	not set	not set	yes	negative	not set	not set	yes	negative	not set	not set	yes	negative	not set	not set	yes	negative	not set	not set
ENSG00000063245	CAB009729	yes	weak	>75%	cytoplasmic	yes	negative	not set	not set	yes	negative	not set	not set	yes	negative	not set	not set	yes	moderate	<25%	cytoplasmic	yes	negative	not set	not set	yes	moderate	75%-25%	cytoplasmic	yes	moderate	<25%	cytoplasmic
ENSG00000004700	CAB009743	yes	strong	>75%	nuclear	yes	negative	not set	not set	yes	negative	not set	not set	yes	negative	not set	not set	yes	strong	>75%	nuclear	yes	negative	not set	not set	yes	moderate	>75%	nuclear	yes	strong	>75%	nuclear
ENSG00000065609	CAB009745	yes	negative	not set	not set	yes	negative	not set	not set	yes	negative	not set	not set	yes	negative	not set	not set	yes	moderate	>75%	cytoplasmic,membrane	yes	negative	not set	not set	yes	negative	not set	not set	yes	moderate	>75%	cytoplasmic,membrane
ENSG00000161513	CAB009818	yes	strong	>75%	cytoplasmic	yes	negative	not set	not set	yes	negative	not set	not set	yes	negative	not set	not set	yes	negative	not set	not set	yes	negative	not set	not set	yes	strong	<25%	cytoplasmic	yes	negative	not set	not set
ENSG00000173372	CAB009823	yes	moderate	>75%	cytoplasmic	yes	negative	not set	not set	yes	negative	not set	not set	yes	negative	not set	not set	yes	negative	not set	not set	yes	negative	not set	not set	yes	negative	not set	not set	yes	negative	not set	not set
ENSG00000173898	CAB009844	yes	negative	not set	not set	yes	negative	not set	not set	yes	negative	not set	not set	yes	negative	not set	not set	yes	negative	not set	not set	yes	negative	not set	not set	yes	negative	not set	not set	yes	moderate	>75%	cytoplasmic
ENSG00000120802	CAB009847	yes	weak	>75%	cytoplasmic	yes	negative	not set	not set	yes	moderate	75%-25%	cytoplasmic	yes	negative	not set	not set	yes	negative	not set	not set	yes	moderate	75%-25%	cytoplasmic	yes	negative	not set	not set	yes	moderate	>75%	cytoplasmic,nuclear
ENSG00000120093	CAB009860	yes	weak	<25%	cytoplasmic,nuclear	yes	negative	not set	not set	yes	negative	not set	not set	yes	negative	not set	not set	yes	weak	<25%	nuclear	yes	moderate	<25%	nuclear	yes	negative	not set	not set	yes	strong	>75%	nuclear
ENSG00000069667	CAB009861	yes	moderate	<25%	nuclear	yes	negative	not set	not set	yes	moderate	75%-25%	nuclear	yes	moderate	75%-25%	nuclear	yes	strong	<25%	nuclear	yes	negative	not set	not set	yes	weak	75%-25%	nuclear	yes	strong	75%-25%	nuclear
ENSG00000153767	CAB009884	yes	strong	<25%	nuclear	yes	negative	not set	not set	yes	strong	>75%	nuclear	yes	moderate	<25%	nuclear	yes	strong	75%-25%	nuclear	yes	strong	<25%	nuclear	yes	strong	>75%	nuclear	yes	strong	>75%	nuclear
ENSG00000106992	CAB009893	yes	moderate	>75%	cytoplasmic,nuclear	yes	weak	75%-25%	cytoplasmic,membrane	yes	negative	not set	not set	yes	negative	not set	not set	yes	negative	not set	not set	yes	negative	not set	not set	yes	negative	not set	not set	yes	moderate	>75%	cytoplasmic,membrane
ENSG00000154767	CAB009932	yes	moderate	<25%	nuclear	yes	negative	not set	not set	yes	negative	not set	not set	yes	negative	not set	not set	yes	strong	<25%	nuclear	yes	negative	not set	not set	yes	moderate	<25%	nuclear	yes	strong	<25%	nuclear
ENSG00000105649	CAB009949	yes	weak	75%-25%	cytoplasmic,membrane	yes	moderate	75%-25%	cytoplasmic,membrane	yes	negative	not set	not set	yes	negative	not set	not set	yes	negative	not set	not set	yes	negative	not set	not set	yes	negative	not set	not set	yes	negative	not set	not set
ENSG00000185049	CAB009960	yes	strong	>75%	nuclear	yes	negative	not set	not set	yes	strong	>75%	nuclear	yes	moderate	<25%	nuclear	yes	strong	>75%	nuclear	yes	strong	>75%	nuclear	yes	moderate	>75%	nuclear	yes	strong	>75%	nuclear
ENSG00000168906	CAB009968	yes	weak	<25%	cytoplasmic	yes	negative	not set	not set	yes	negative	not set	not set	yes	negative	not set	not set	yes	negative	not set	not set	yes	negative	not set	not set	yes	negative	not set	not set	yes	moderate	<25%	cytoplasmic,nuclear
ENSG00000137824	HPA009975	yes	strong	>75%	cytoplasmic	yes	negative	not set	not set	yes	strong	>75%	cytoplasmic	yes	negative	not set	not set	yes	strong	>75%	cytoplasmic	yes	strong	75%-25%	cytoplasmic	yes	moderate	>75%	cytoplasmic	yes	strong	>75%	cytoplasmic
ENSG00000116194	HPA009976	yes	moderate	<25%	cytoplasmic	yes	negative	not set	not set	yes	negative	not set	not set	yes	moderate	>75%	cytoplasmic,membrane	yes	negative	not set	not set	yes	negative	not set	not set	yes	moderate	>75%	cytoplasmic,membrane	yes	negative	not set	not set
ENSG00000134049	HPA010027	yes	strong	>75%	cytoplasmic	yes	negative	not set	not set	yes	negative	not set	not set	yes	negative	not set	not set	yes	negative	not set	not set	yes	negative	not set	not set	yes	moderate	>75%	cytoplasmic	yes	negative	not set	not set
ENSG00000134153	HPA010029	yes	strong	>75%	cytoplasmic	yes	negative	not set	not set	yes	negative	not set	not set	yes	negative	not set	not set	yes	negative	not set	not set	yes	negative	not set	not set	yes	strong	75%-25%	cytoplasmic	yes	negative	not set	not set
ENSG00000172354	CAB010032	yes	weak	<25%	cytoplasmic	yes	moderate	75%-25%	cytoplasmic	yes	negative	not set	not set	yes	negative	not set	not set	yes	negative	not set	not set	yes	negative	not set	not set	yes	weak	75%-25%	cytoplasmic	yes	negative	not set	not set
ENSG00000146535	CAB010046	yes	moderate	>75%	cytoplasmic,membrane	yes	strong	75%-25%		yes	negative	not set	not set	yes	negative	not set	not set	yes	negative	not set	not set	yes	negative	not set	not set	yes	negative	not set	not set	yes	negative	not set	not set
ENSG00000156515	CAB010052	yes	strong	>75%	cytoplasmic	yes	strong	>75%	cytoplasmic	yes	strong	>75%	cytoplasmic	yes	negative	not set	not set	yes	negative	not set	not set	yes	strong	>75%	cytoplasmic	yes	moderate	>75%	cytoplasmic	yes	strong	>75%	cytoplasmic
ENSG00000120063	HPA010087	yes	moderate	>75%	cytoplasmic	yes	negative	not set	not set	yes	negative	not set	not set	yes	negative	not set	not set	yes	negative	not set	not set	yes	negative	not set	not set	yes	negative	not set	not set	yes	moderate	<25%	cytoplasmic
ENSG00000160219	HPA010090	yes	moderate	75%-25%	cytoplasmic	yes	negative	not set	not set	yes	negative	not set	not set	yes	weak	<25%	cytoplasmic	yes	negative	not set	not set	yes	negative	not set	not set	yes	negative	not set	not set	yes	moderate	<25%	cytoplasmic
ENSG00000155324	HPA010095	yes	negative	not set	not set	yes	moderate	>75%	cytoplasmic	yes	moderate	75%-25%	cytoplasmic	yes	negative	not set	not set	yes	moderate	75%-25%	cytoplasmic	yes	moderate	75%-25%	cytoplasmic	yes	negative	not set	not set	yes	moderate	>75%	cytoplasmic
ENSG00000170989	CAB010104	yes	strong	>75%	cytoplasmic	yes	strong	>75%	cytoplasmic	yes	moderate	>75%	cytoplasmic	yes	negative	not set	not set	yes	moderate	>75%	cytoplasmic	yes	strong	>75%	cytoplasmic	yes	moderate	>75%	cytoplasmic	yes	moderate	>75%	cytoplasmic
ENSG00000117632	CAB010107	yes	negative	not set	not set	yes	negative	not set	not set	yes	strong	>75%	cytoplasmic	yes	negative	not set	not set	yes	negative	not set	not set	yes	negative	not set	not set	yes	weak	>75%	cytoplasmic	yes	strong	<25%	cytoplasmic
ENSG00000138768	CAB010108	yes	strong	75%-25%	cytoplasmic	yes	moderate	<25%	cytoplasmic	yes	strong	75%-25%	cytoplasmic	yes	negative	not set	not set	yes	negative	not set	not set	yes	strong	75%-25%	cytoplasmic	yes	moderate	75%-25%	cytoplasmic	yes	strong	75%-25%	cytoplasmic
ENSG00000113356	CAB010109	yes	negative	not set	not set	yes	negative	not set	not set	yes	weak	75%-25%	nuclear	yes	negative	not set	not set	yes	strong	<25%	nuclear	yes	negative	not set	not set	yes	negative	not set	not set	yes	strong	<25%	nuclear
ENSG00000127838	HPA010134	yes	negative	not set	not set	yes	negative	not set	not set	yes	negative	not set	not set	yes	negative	not set	not set	yes	negative	not set	not set	yes	strong	>75%	nuclear	yes	negative	not set	not set	yes	negative	not set	not set
ENSG00000068654	CAB010145	yes	negative	not set	not set	yes	negative	not set	not set	yes	negative	not set	not set	yes	negative	not set	not set	yes	negative	not set	not set	yes	negative	not set	not set	yes	strong	>75%	nuclear	yes	negative	not set	not set
ENSG00000035862	CAB010203	yes	weak	<25%	cytoplasmic	yes	weak	<25%	nuclear	yes	negative	not set	not set	yes	moderate	75%-25%	cytoplasmic	yes	negative	not set	not set	yes	negative	not set	not set	yes	negative	not set	not set	yes	negative	not set	not set
ENSG00000122512	CAB010235	yes	weak	75%-25%	nuclear	yes	negative	not set	not set	yes	moderate	75%-25%	nuclear	yes	negative	not set	not set	yes	moderate	<25%	nuclear	yes	moderate	75%-25%	nuclear	yes	weak	>75%	nuclear	yes	strong	75%-25%	nuclear
ENSG00000167182	CAB010245	yes	moderate	>75%	cytoplasmic	yes	negative	not set	not set	yes	moderate	>75%	nuclear	yes	negative	not set	not set	yes	strong	>75%	nuclear	yes	weak	75%-25%	nuclear	yes	moderate	>75%	cytoplasmic	yes	moderate	75%-25%	nuclear
ENSG00000146232	CAB010272	yes	strong	>75%	cytoplasmic	yes	strong	>75%	cytoplasmic,nuclear	yes	strong	>75%	cytoplasmic,nuclear	yes	negative	not set	not set	yes	strong	>75%	cytoplasmic	yes	strong	>75%	cytoplasmic,nuclear	yes	strong	>75%	cytoplasmic	yes	strong	>75%	cytoplasmic
ENSG00000134308	CAB010286	yes	weak	>75%	cytoplasmic	yes	moderate	75%-25%	cytoplasmic	yes	weak	>75%	cytoplasmic	yes	weak	75%-25%	cytoplasmic	yes	weak	>75%	cytoplasmic	yes	moderate	75%-25%	cytoplasmic	yes	negative	not set	not set	yes	moderate	75%-25%	cytoplasmic
ENSG00000137275	CAB010302	yes	strong	>75%	cytoplasmic	yes	strong	>75%	cytoplasmic,nuclear	yes	moderate	>75%	cytoplasmic	yes	negative	not set	not set	yes	moderate	>75%	cytoplasmic	yes	moderate	>75%	cytoplasmic	yes	moderate	>75%	cytoplasmic	yes	strong	>75%	cytoplasmic
ENSG00000136997	CAB010307	yes	moderate	<25%	cytoplasmic	yes	negative	not set	not set	yes	negative	not set	not set	yes	negative	not set	not set	yes	negative	not set	not set	yes	negative	not set	not set	yes	moderate	<25%	nuclear	yes	negative	not set	not set
ENSG00000120156	CAB010359	yes	moderate	>75%	cytoplasmic,membrane	yes	strong	>75%	cytoplasmic,membrane	yes	strong	75%-25%	cytoplasmic,membrane	yes	negative	not set	not set	yes	negative	not set	not set	yes	strong	>75%	cytoplasmic,membrane	yes	moderate	>75%	cytoplasmic	yes	negative	not set	not set
ENSG00000117335	CAB010401	yes	moderate	75%-25%	membrane	yes	negative	not set	not set	yes	negative	not set	not set	yes	negative	not set	not set	yes	negative	not set	not set	yes	strong	75%-25%	cytoplasmic	yes	moderate	>75%	membrane	yes	negative	not set	not set
ENSG00000135100	CAB010430	yes	weak	>75%	cytoplasmic,membrane	yes	moderate	75%-25%	cytoplasmic,membrane	yes	negative	not set	not set	yes	negative	not set	not set	yes	negative	not set	not set	yes	negative	not set	not set	yes	negative	not set	not set	yes	negative	not set	not set
ENSG00000113580	CAB010435	yes	strong	75%-25%	nuclear	yes	negative	not set	not set	yes	negative	not set	not set	yes	strong	>75%	nuclear	yes	negative	not set	not set	yes	negative	not set	not set	yes	moderate	>75%	nuclear	yes	moderate	75%-25%	nuclear
ENSG00000157933	CAB010449	yes	weak	75%-25%	cytoplasmic	yes	negative	not set	not set	yes	negative	not set	not set	yes	negative	not set	not set	yes	negative	not set	not set	yes	negative	not set	not set	yes	negative	not set	not set	yes	strong	75%-25%	cytoplasmic,nuclear
ENSG00000168003	CAB010455	yes	negative	not set	not set	yes	negative	not set	not set	yes	negative	not set	not set	yes	negative	not set	not set	yes	negative	not set	not set	yes	negative	not set	not set	yes	strong	75%-25%	membrane	yes	negative	not set	not set
ENSG00000149218	HPA010517	yes	moderate	>75%	cytoplasmic	yes	weak	>75%	cytoplasmic	yes	moderate	>75%	cytoplasmic	yes	weak	>75%	cytoplasmic	yes	moderate	>75%	cytoplasmic	yes	negative	not set	not set	yes	negative	not set	not set	yes	strong	>75%	cytoplasmic,membrane
ENSG00000146457	HPA010550	yes	moderate	75%-25%	nuclear	yes	negative	not set	not set	yes	strong	>75%	nuclear	yes	negative	not set	not set	yes	moderate	>75%	nuclear	yes	moderate	<25%	nuclear	yes	weak	>75%	nuclear	yes	strong	>75%	nuclear
ENSG00000146242	HPA010554	yes	moderate	75%-25%	cytoplasmic,membrane	yes	weak	75%-25%	cytoplasmic,membrane	yes	negative	not set	not set	yes	negative	not set	not set	yes	negative	not set	not set	yes	negative	not set	not set	yes	negative	not set	not set	yes	negative	not set	not set
ENSG00000179593	HPA010562	yes	moderate	>75%	cytoplasmic	yes	negative	not set	not set	yes	negative	not set	not set	yes	negative	not set	not set	yes	negative	not set	not set	yes	negative	not set	not set	yes	weak	75%-25%	cytoplasmic	yes	negative	not set	not set
ENSG00000105229	HPA010598	yes	weak	>75%	cytoplasmic	yes	moderate	>75%	cytoplasmic,membrane	yes	weak	75%-25%	cytoplasmic	yes	negative	not set	not set	yes	negative	not set	not set	yes	strong	>75%	nuclear	yes	negative	not set	not set	yes	negative	not set	not set
ENSG00000135052	HPA010638	yes	strong	>75%	cytoplasmic	yes	strong	>75%	cytoplasmic	yes	strong	75%-25%	cytoplasmic	yes	negative	not set	not set	yes	strong	>75%	cytoplasmic	yes	strong	>75%	cytoplasmic	yes	negative	not set	not set	yes	strong	>75%	cytoplasmic
ENSG00000125656	HPA010649	yes	strong	>75%	cytoplasmic,membrane	yes	negative	not set	not set	yes	negative	not set	not set	yes	negative	not set	not set	yes	strong	>75%	cytoplasmic,membrane	yes	negative	not set	not set	yes	weak	75%-25%	cytoplasmic,membrane	yes	strong	>75%	cytoplasmic,membrane
ENSG00000149930	HPA010650	yes	negative	not set	not set	yes	negative	not set	not set	yes	negative	not set	not set	yes	negative	not set	not set	yes	negative	not set	not set	yes	negative	not set	not set	yes	negative	not set	not set	yes	strong	<25%	cytoplasmic,nuclear
ENSG00000171433	HPA010667	yes	strong	>75%	cytoplasmic	yes	negative	not set	not set	yes	moderate	<25%	cytoplasmic	yes	negative	not set	not set	yes	moderate	<25%	cytoplasmic	yes	negative	not set	not set	yes	negative	not set	not set	yes	strong	<25%	cytoplasmic
ENSG00000152661	CAB010753	yes	strong	>75%	cytoplasmic,membrane	yes	moderate	>75%	cytoplasmic	yes	negative	not set	not set	yes	negative	not set	not set	yes	negative	not set	not set	yes	negative	not set	not set	yes	strong	>75%	cytoplasmic,membrane	yes	negative	not set	not set
ENSG00000196586	CAB010762	yes	strong	>75%	cytoplasmic	yes	negative	not set	not set	yes	negative	not set	not set	yes	negative	not set	not set	yes	negative	not set	not set	yes	negative	not set	not set	yes	strong	>75%	cytoplasmic	yes	negative	not set	not set
ENSG00000158850	HPA010793	yes	moderate	<25%	cytoplasmic	yes	negative	not set	not set	yes	negative	not set	not set	yes	negative	not set	not set	yes	moderate	<25%	nuclear	yes	negative	not set	not set	yes	negative	not set	not set	yes	negative	not set	not set
ENSG00000086062	HPA010807	yes	strong	>75%	cytoplasmic,membrane	yes	negative	not set	not set	yes	negative	not set	not set	yes	negative	not set	not set	yes	negative	not set	not set	yes	negative	not set	not set	yes	moderate	>75%	cytoplasmic,membrane	yes	negative	not set	not set
ENSG00000089693	HPA010811	yes	strong	>75%	cytoplasmic	yes	negative	not set	not set	yes	strong	75%-25%	nuclear	yes	negative	not set	not set	yes	moderate	<25%	nuclear	yes	moderate	<25%	nuclear	yes	strong	>75%	cytoplasmic	yes	negative	not set	not set
ENSG00000104067	CAB010822	yes	negative	not set	not set	yes	negative	not set	not set	yes	negative	not set	not set	yes	negative	not set	not set	yes	negative	not set	not set	yes	negative	not set	not set	yes	strong	75%-25%	membrane	yes	negative	not set	not set
ENSG00000197724	HPA010831	yes	moderate	>75%	cytoplasmic,nuclear	yes	negative	not set	not set	yes	negative	not set	not set	yes	moderate	>75%	nuclear	yes	moderate	>75%	nuclear	yes	negative	not set	not set	yes	weak	>75%	nuclear	yes	negative	not set	not set
ENSG00000162496	HPA010844	yes	moderate	>75%	cytoplasmic	yes	negative	not set	not set	yes	moderate	75%-25%	cytoplasmic	yes	moderate	75%-25%	cytoplasmic	yes	negative	not set	not set	yes	negative	not set	not set	yes	negative	not set	not set	yes	negative	not set	not set
ENSG00000090054	HPA010860	yes	moderate	>75%	cytoplasmic	yes	moderate	>75%	cytoplasmic	yes	moderate	>75%	cytoplasmic	yes	negative	not set	not set	yes	moderate	>75%	cytoplasmic	yes	moderate	>75%	cytoplasmic	yes	strong	>75%	cytoplasmic	yes	moderate	>75%	cytoplasmic
ENSG00000188229	CAB010880	yes	negative	not set	not set	yes	negative	not set	not set	yes	moderate	<25%	cytoplasmic	yes	negative	not set	not set	yes	moderate	<25%	cytoplasmic	yes	strong	75%-25%	cytoplasmic	yes	negative	not set	not set	yes	strong	<25%	cytoplasmic
ENSG00000109956	CAB010893	yes	negative	not set	not set	yes	negative	not set	not set	yes	negative	not set	not set	yes	negative	not set	not set	yes	negative	not set	not set	yes	negative	not set	not set	yes	moderate	>75%	cytoplasmic,membrane	yes	negative	not set	not set
ENSG00000135486	CAB010894	yes	strong	>75%	nuclear	yes	negative	not set	not set	yes	strong	75%-25%	nuclear	yes	strong	>75%	nuclear	yes	strong	>75%	nuclear	yes	strong	>75%	nuclear	yes	strong	>75%	nuclear	yes	strong	>75%	nuclear
ENSG00000135316	CAB010895	yes	moderate	>75%	cytoplasmic,nuclear	yes	negative	not set	not set	yes	moderate	75%-25%	nuclear	yes	negative	not set	not set	yes	negative	not set	not set	yes	negative	not set	not set	yes	moderate	75%-25%	nuclear	yes	moderate	>75%	nuclear
ENSG00000063244	CAB010910	yes	strong	>75%	nuclear	yes	negative	not set	not set	yes	strong	>75%	nuclear	yes	strong	>75%	nuclear	yes	strong	>75%	nuclear	yes	strong	>75%	nuclear	yes	strong	>75%	nuclear	yes	strong	>75%	nuclear
ENSG00000147649	HPA010932	yes	strong	>75%	cytoplasmic	yes	negative	not set	not set	yes	negative	not set	not set	yes	negative	not set	not set	yes	negative	not set	not set	yes	negative	not set	not set	yes	strong	>75%	cytoplasmic	yes	strong	>75%	cytoplasmic
ENSG00000168958	HPA010968	yes	negative	not set	not set	yes	moderate	<25%	cytoplasmic	yes	moderate	<25%	cytoplasmic	yes	negative	not set	not set	yes	moderate	<25%	cytoplasmic	yes	negative	not set	not set	yes	negative	not set	not set	yes	moderate	75%-25%	cytoplasmic
ENSG00000164051	HPA010980	yes	strong	<25%	cytoplasmic	yes	negative	not set	not set	yes	negative	not set	not set	yes	negative	not set	not set	yes	negative	not set	not set	yes	negative	not set	not set	yes	strong	75%-25%	cytoplasmic	yes	negative	not set	not set
ENSG00000173227	HPA011006	yes	weak	75%-25%	cytoplasmic	yes	moderate	75%-25%	cytoplasmic,membrane	yes	negative	not set	not set	yes	negative	not set	not set	yes	negative	not set	not set	yes	negative	not set	not set	yes	negative	not set	not set	yes	negative	not set	not set
ENSG00000173230	HPA011008	yes	strong	75%-25%	cytoplasmic	yes	negative	not set	not set	yes	moderate	<25%	cytoplasmic	yes	negative	not set	not set	yes	negative	not set	not set	yes	negative	not set	not set	yes	negative	not set	not set	yes	strong	>75%	cytoplasmic
ENSG00000132694	HPA011026	yes	strong	75%-25%	cytoplasmic,nuclear	yes	negative	not set	not set	yes	strong	75%-25%	cytoplasmic	yes	negative	not set	not set	yes	strong	75%-25%	cytoplasmic	yes	strong	75%-25%	cytoplasmic	yes	strong	>75%	cytoplasmic	yes	strong	75%-25%	cytoplasmic
ENSG00000168924	HPA011029	yes	strong	75%-25%	cytoplasmic	yes	moderate	>75%	cytoplasmic	yes	moderate	>75%	cytoplasmic	yes	negative	not set	not set	yes	negative	not set	not set	yes	moderate	>75%	cytoplasmic	yes	weak	>75%	cytoplasmic	yes	strong	>75%	cytoplasmic
ENSG00000170632	HPA011036	yes	strong	>75%	cytoplasmic	yes	negative	not set	not set	yes	negative	not set	not set	yes	negative	not set	not set	yes	negative	not set	not set	yes	negative	not set	not set	yes	strong	>75%	cytoplasmic	yes	negative	not set	not set
ENSG00000172375	HPA011044	yes	weak	75%-25%	cytoplasmic,nuclear	yes	moderate	>75%	cytoplasmic,membrane	yes	moderate	75%-25%	cytoplasmic	yes	negative	not set	not set	yes	negative	not set	not set	yes	moderate	75%-25%	cytoplasmic	yes	negative	not set	not set	yes	moderate	75%-25%	cytoplasmic,nuclear
ENSG00000172469	HPA011046	yes	weak	>75%	cytoplasmic	yes	negative	not set	not set	yes	moderate	75%-25%	cytoplasmic	yes	negative	not set	not set	yes	negative	not set	not set	yes	weak	75%-25%	cytoplasmic	yes	negative	not set	not set	yes	negative	not set	not set
ENSG00000184602	HPA011055	yes	moderate	>75%	cytoplasmic,nuclear	yes	moderate	>75%	cytoplasmic,membrane	yes	negative	not set	not set	yes	negative	not set	not set	yes	strong	>75%	cytoplasmic,nuclear	yes	negative	not set	not set	yes	negative	not set	not set	yes	strong	>75%	cytoplasmic,nuclear
ENSG00000170632	HPA011057	yes	moderate	>75%	cytoplasmic	yes	negative	not set	not set	yes	negative	not set	not set	yes	negative	not set	not set	yes	negative	not set	not set	yes	negative	not set	not set	yes	strong	>75%	cytoplasmic	yes	negative	not set	not set
ENSG00000175928	HPA011071	yes	negative	not set	not set	yes	negative	not set	not set	yes	moderate	75%-25%	cytoplasmic	yes	negative	not set	not set	yes	moderate	75%-25%	cytoplasmic	yes	negative	not set	not set	yes	negative	not set	not set	yes	strong	>75%	cytoplasmic
ENSG00000168283	CAB011120	yes	weak	<25%	nuclear	yes	negative	not set	not set	yes	strong	75%-25%	cytoplasmic	yes	negative	not set	not set	yes	negative	not set	not set	yes	negative	not set	not set	yes	moderate	>75%	nuclear	yes	moderate	75%-25%	nuclear
ENSG00000166049	HPA011122	yes	weak	<25%	cytoplasmic	yes	negative	not set	not set	yes	negative	not set	not set	yes	negative	not set	not set	yes	moderate	75%-25%	nuclear	yes	negative	not set	not set	yes	negative	not set	not set	yes	strong	>75%	nuclear
ENSG00000137500	HPA011130	yes	moderate	>75%	cytoplasmic,membrane	yes	weak	>75%	cytoplasmic,membrane	yes	strong	>75%	cytoplasmic,membrane	yes	negative	not set	not set	yes	strong	>75%	cytoplasmic,membrane	yes	moderate	>75%	cytoplasmic,membrane	yes	negative	not set	not set	yes	strong	>75%	cytoplasmic,membrane
ENSG00000106648	HPA011140	yes	weak	>75%	cytoplasmic	yes	strong	>75%	cytoplasmic	yes	strong	>75%	cytoplasmic,membrane	yes	negative	not set	not set	yes	weak	>75%	cytoplasmic,membrane	yes	strong	>75%	cytoplasmic,membrane	yes	negative	not set	not set	yes	weak	>75%	cytoplasmic,membrane
ENSG00000107020	HPA011144	yes	moderate	>75%	cytoplasmic	yes	moderate	75%-25%	cytoplasmic	yes	negative	not set	not set	yes	negative	not set	not set	yes	negative	not set	not set	yes	negative	not set	not set	yes	moderate	75%-25%	cytoplasmic	yes	negative	not set	not set
ENSG00000140297	HPA011154	yes	weak	75%-25%	cytoplasmic	yes	negative	not set	not set	yes	negative	not set	not set	yes	negative	not set	not set	yes	negative	not set	not set	yes	negative	not set	not set	yes	moderate	<25%	cytoplasmic	yes	moderate	<25%	cytoplasmic
ENSG00000144567	HPA011170	yes	weak	>75%	cytoplasmic,membrane	yes	strong	>75%	cytoplasmic,membrane	yes	strong	>75%	cytoplasmic,membrane	yes	negative	not set	not set	yes	negative	not set	not set	yes	strong	>75%	cytoplasmic,membrane	yes	weak	>75%	cytoplasmic	yes	negative	not set	not set
ENSG00000196436,ENSG00000196993,ENSG00000198156,ENSG00000233232,ENSG00000255524	HPA011188	yes	strong	75%-25%	nuclear	yes	strong	>75%	nuclear	yes	negative	not set	not set	yes	strong	>75%	nuclear	yes	weak	75%-25%	nuclear	yes	strong	>75%	cytoplasmic,nuclear	yes	strong	>75%	nuclear	yes	strong	<25%	nuclear
ENSG00000110777	CAB011193	yes	moderate	75%-25%	cytoplasmic,membrane	yes	negative	not set	not set	yes	negative	not set	not set	yes	negative	not set	not set	yes	negative	not set	not set	yes	negative	not set	not set	yes	moderate	>75%	cytoplasmic,membrane	yes	negative	not set	not set
ENSG00000189046	CAB011198	yes	moderate	75%-25%	cytoplasmic,nuclear	yes	negative	not set	not set	yes	negative	not set	not set	yes	moderate	>75%	nuclear	yes	strong	>75%	nuclear	yes	negative	not set	not set	yes	negative	not set	not set	yes	moderate	>75%	nuclear
ENSG00000129355	CAB011201	yes	negative	not set	not set	yes	negative	not set	not set	yes	strong	>75%	nuclear	yes	negative	not set	not set	yes	negative	not set	not set	yes	moderate	75%-25%	nuclear	yes	weak	>75%	cytoplasmic	yes	strong	75%-25%	nuclear
ENSG00000166913	HPA011212	yes	moderate	>75%	cytoplasmic	yes	negative	not set	not set	yes	negative	not set	not set	yes	negative	not set	not set	yes	negative	not set	not set	yes	moderate	<25%	nuclear	yes	moderate	>75%	cytoplasmic	yes	moderate	<25%	cytoplasmic
ENSG00000138650	HPA011220	yes	moderate	>75%	cytoplasmic	yes	negative	not set	not set	yes	negative	not set	not set	yes	negative	not set	not set	yes	negative	not set	not set	yes	negative	not set	not set	yes	weak	>75%	membrane	yes	strong	>75%	cytoplasmic
ENSG00000143641	HPA011222	yes	strong	75%-25%	nuclear	yes	negative	not set	not set	yes	negative	not set	not set	yes	negative	not set	not set	yes	negative	not set	not set	yes	negative	not set	not set	yes	negative	not set	not set	yes	strong	<25%	cytoplasmic
ENSG00000093010	CAB011233	yes	moderate	>75%	cytoplasmic	yes	negative	not set	not set	yes	negative	not set	not set	yes	negative	not set	not set	yes	negative	not set	not set	yes	negative	not set	not set	yes	moderate	>75%	cytoplasmic	yes	negative	not set	not set
ENSG00000078808	HPA011249	yes	negative	not set	not set	yes	negative	not set	not set	yes	strong	>75%	cytoplasmic	yes	negative	not set	not set	yes	strong	75%-25%	cytoplasmic	yes	strong	>75%	cytoplasmic	yes	moderate	<25%	cytoplasmic	yes	negative	not set	not set
ENSG00000107566	HPA011252	yes	strong	>75%	cytoplasmic	yes	negative	not set	not set	yes	strong	75%-25%	cytoplasmic,membrane	yes	negative	not set	not set	yes	moderate	75%-25%	cytoplasmic,membrane	yes	strong	75%-25%	cytoplasmic,membrane	yes	negative	not set	not set	yes	negative	not set	not set
ENSG00000156219	HPA011268	yes	weak	>75%	cytoplasmic	yes	strong	>75%	cytoplasmic,membrane	yes	strong	>75%	cytoplasmic,membrane	yes	negative	not set	not set	yes	weak	>75%	cytoplasmic,membrane	yes	strong	>75%	cytoplasmic,membrane	yes	negative	not set	not set	yes	weak	>75%	cytoplasmic
ENSG00000165868	HPA011273	yes	moderate	<25%	cytoplasmic	yes	negative	not set	not set	yes	negative	not set	not set	yes	negative	not set	not set	yes	negative	not set	not set	yes	negative	not set	not set	yes	strong	75%-25%	cytoplasmic	yes	negative	not set	not set
ENSG00000176988	HPA011284	yes	weak	>75%	cytoplasmic	yes	strong	>75%	cytoplasmic	yes	strong	>75%	cytoplasmic	yes	negative	not set	not set	yes	strong	>75%	cytoplasmic	yes	strong	>75%	cytoplasmic	yes	negative	not set	not set	yes	strong	>75%	cytoplasmic
ENSG00000186260	HPA011286	yes	moderate	<25%	nuclear	yes	negative	not set	not set	yes	strong	>75%	nuclear	yes	negative	not set	not set	yes	strong	<25%	nuclear	yes	strong	75%-25%	nuclear	yes	negative	not set	not set	yes	strong	75%-25%	nuclear
ENSG00000147403,ENSG00000165496	HPA011311	yes	strong	>75%	cytoplasmic	yes	negative	not set	not set	yes	negative	not set	not set	yes	negative	not set	not set	yes	negative	not set	not set	yes	negative	not set	not set	yes	moderate	<25%	cytoplasmic	yes	moderate	75%-25%	cytoplasmic
ENSG00000151726	HPA011316	yes	moderate	75%-25%	cytoplasmic,membrane	yes	strong	>75%	cytoplasmic,membrane	yes	negative	not set	not set	yes	negative	not set	not set	yes	negative	not set	not set	yes	strong	<25%	cytoplasmic,membrane	yes	negative	not set	not set	yes	negative	not set	not set
ENSG00000197081	HPA011332	yes	strong	75%-25%	cytoplasmic	yes	negative	not set	not set	yes	negative	not set	not set	yes	negative	not set	not set	yes	negative	not set	not set	yes	negative	not set	not set	yes	moderate	>75%	cytoplasmic	yes	negative	not set	not set
ENSG00000139178	HPA011338	yes	negative	not set	not set	yes	negative	not set	not set	yes	negative	not set	not set	yes	negative	not set	not set	yes	negative	not set	not set	yes	negative	not set	not set	yes	negative	not set	not set	yes	strong	75%-25%	cytoplasmic
ENSG00000150459	HPA011352	yes	moderate	75%-25%	cytoplasmic	yes	negative	not set	not set	yes	moderate	75%-25%	nuclear	yes	negative	not set	not set	yes	weak	75%-25%	nuclear	yes	moderate	>75%	nuclear	yes	moderate	>75%	nuclear	yes	weak	75%-25%	nuclear
ENSG00000115289	HPA011356	yes	weak	<25%	cytoplasmic	yes	negative	not set	not set	yes	moderate	<25%	nuclear	yes	negative	not set	not set	yes	moderate	<25%	nuclear	yes	moderate	<25%	nuclear	yes	negative	not set	not set	yes	moderate	<25%	nuclear
ENSG00000096401	HPA011361	yes	moderate	<25%	nuclear	yes	negative	not set	not set	yes	negative	not set	not set	yes	negative	not set	not set	yes	negative	not set	not set	yes	weak	<25%	nuclear	yes	weak	75%-25%	nuclear	yes	strong	75%-25%	nuclear
ENSG00000181163	HPA011384	yes	strong	>75%	nuclear	yes	strong	>75%	cytoplasmic	yes	strong	>75%	nuclear	yes	strong	>75%	nuclear	yes	strong	>75%	nuclear	yes	strong	>75%	nuclear	yes	strong	>75%	nuclear	yes	strong	>75%	nuclear
ENSG00000134265	HPA011389	yes	moderate	>75%	cytoplasmic	yes	negative	not set	not set	yes	negative	not set	not set	yes	negative	not set	not set	yes	negative	not set	not set	yes	negative	not set	not set	yes	negative	not set	not set	yes	moderate	75%-25%	cytoplasmic
ENSG00000110077	HPA011391	yes	strong	75%-25%	nuclear	yes	negative	not set	not set	yes	negative	not set	not set	yes	moderate	>75%	nuclear	yes	moderate	<25%	nuclear	yes	negative	not set	not set	yes	strong	75%-25%	nuclear	yes	strong	75%-25%	nuclear
ENSG00000152049	HPA011420	yes	negative	not set	not set	yes	negative	not set	not set	yes	negative	not set	not set	yes	negative	not set	not set	yes	negative	not set	not set	yes	negative	not set	not set	yes	negative	not set	not set	yes	moderate	75%-25%	cytoplasmic
ENSG00000226887	HPA011423	yes	negative	not set	not set	yes	negative	not set	not set	yes	negative	not set	not set	yes	negative	not set	not set	yes	negative	not set	not set	yes	negative	not set	not set	yes	moderate	>75%	membrane	yes	negative	not set	not set
ENSG00000105383	CAB011442	yes	moderate	75%-25%	cytoplasmic,nuclear	yes	moderate	75%-25%	nuclear	yes	moderate	75%-25%	cytoplasmic,nuclear	yes	negative	not set	not set	yes	strong	75%-25%	nuclear	yes	strong	>75%	nuclear	yes	negative	not set	not set	yes	strong	75%-25%	nuclear
ENSG00000112312	CAB011458	yes	weak	<25%	cytoplasmic	yes	negative	not set	not set	yes	strong	>75%	nuclear	yes	negative	not set	not set	yes	moderate	<25%	nuclear	yes	negative	not set	not set	yes	negative	not set	not set	yes	strong	<25%	nuclear
ENSG00000060656	CAB011476	yes	moderate	>75%	cytoplasmic	yes	negative	not set	not set	yes	strong	75%-25%	cytoplasmic,membrane	yes	negative	not set	not set	yes	moderate	<25%	cytoplasmic,membrane	yes	moderate	<25%	cytoplasmic	yes	negative	not set	not set	yes	moderate	<25%	cytoplasmic,membrane
ENSG00000163041	CAB011481	yes	strong	>75%	nuclear	yes	negative	not set	not set	yes	moderate	75%-25%	nuclear	yes	moderate	75%-25%	nuclear	yes	moderate	<25%	nuclear	yes	strong	75%-25%	nuclear	yes	negative	not set	not set	yes	strong	<25%	nuclear
ENSG00000196781	CAB011482	yes	negative	not set	not set	yes	negative	not set	not set	yes	negative	not set	not set	yes	negative	not set	not set	yes	strong	>75%	nuclear	yes	moderate	<25%	nuclear	yes	moderate	75%-25%	nuclear	yes	strong	>75%	nuclear
ENSG00000184270	CAB011483	yes	moderate	75%-25%	nuclear	yes	negative	not set	not set	yes	negative	not set	not set	yes	moderate	75%-25%	nuclear	yes	strong	<25%	nuclear	yes	negative	not set	not set	yes	negative	not set	not set	yes	strong	75%-25%	nuclear
ENSG00000166794	CAB011487	yes	moderate	>75%	cytoplasmic	yes	negative	not set	not set	yes	negative	not set	not set	yes	negative	not set	not set	yes	negative	not set	not set	yes	negative	not set	not set	yes	moderate	75%-25%	cytoplasmic	yes	negative	not set	not set
ENSG00000134243	CAB011498	yes	weak	<25%	cytoplasmic	yes	moderate	>75%	cytoplasmic,membrane	yes	negative	not set	not set	yes	negative	not set	not set	yes	negative	not set	not set	yes	negative	not set	not set	yes	negative	not set	not set	yes	negative	not set	not set
ENSG00000114861	CAB011501	yes	moderate	75%-25%	cytoplasmic	yes	negative	not set	not set	yes	negative	not set	not set	yes	negative	not set	not set	yes	negative	not set	not set	yes	negative	not set	not set	yes	weak	75%-25%	cytoplasmic	yes	moderate	<25%	nuclear
ENSG00000197837	CAB011503	yes	moderate	<25%	nuclear	yes	negative	not set	not set	yes	negative	not set	not set	yes	moderate	75%-25%	nuclear	yes	strong	<25%	nuclear	yes	moderate	75%-25%	nuclear	yes	negative	not set	not set	yes	strong	>75%	nuclear
ENSG00000187837	CAB011507	yes	strong	>75%	nuclear	yes	negative	not set	not set	yes	strong	>75%	nuclear	yes	strong	75%-25%	nuclear	yes	strong	>75%	nuclear	yes	moderate	<25%	nuclear	yes	strong	>75%	nuclear	yes	strong	>75%	nuclear
ENSG00000135506	CAB011518	yes	strong	>75%	cytoplasmic	yes	negative	not set	not set	yes	strong	75%-25%	cytoplasmic,membrane	yes	weak	75%-25%	cytoplasmic	yes	negative	not set	not set	yes	negative	not set	not set	yes	moderate	>75%	cytoplasmic	yes	strong	>75%	cytoplasmic,membrane
ENSG00000143995	CAB011521	yes	weak	>75%	cytoplasmic,membrane	yes	strong	>75%	cytoplasmic,membrane	yes	moderate	75%-25%	cytoplasmic	yes	negative	not set	not set	yes	strong	>75%	cytoplasmic,nuclear	yes	moderate	75%-25%	cytoplasmic	yes	negative	not set	not set	yes	strong	>75%	cytoplasmic,nuclear
ENSG00000153187	CAB011532	yes	strong	>75%	nuclear	yes	negative	not set	not set	yes	strong	>75%	nuclear	yes	strong	>75%	nuclear	yes	strong	>75%	nuclear	yes	strong	>75%	nuclear	yes	strong	>75%	nuclear	yes	strong	>75%	nuclear
ENSG00000070756	CAB011536	yes	weak	75%-25%	cytoplasmic	yes	negative	not set	not set	yes	strong	>75%	cytoplasmic,membrane	yes	negative	not set	not set	yes	negative	not set	not set	yes	strong	>75%	cytoplasmic,membrane	yes	negative	not set	not set	yes	negative	not set	not set
ENSG00000107404	CAB011538	yes	strong	75%-25%	cytoplasmic	yes	moderate	<25%	cytoplasmic	yes	moderate	75%-25%	cytoplasmic	yes	negative	not set	not set	yes	moderate	<25%	cytoplasmic	yes	negative	not set	not set	yes	negative	not set	not set	yes	strong	75%-25%	cytoplasmic
ENSG00000173230	HPA011555	yes	moderate	75%-25%	cytoplasmic	yes	negative	not set	not set	yes	moderate	>75%	cytoplasmic	yes	negative	not set	not set	yes	negative	not set	not set	yes	moderate	75%-25%	cytoplasmic	yes	negative	not set	not set	yes	moderate	75%-25%	cytoplasmic
ENSG00000173706	HPA011559	yes	negative	not set	not set	yes	moderate	>75%	cytoplasmic,membrane	yes	negative	not set	not set	yes	negative	not set	not set	yes	negative	not set	not set	yes	negative	not set	not set	yes	negative	not set	not set	yes	strong	75%-25%	cytoplasmic,membrane
ENSG00000173726	HPA011562	yes	strong	>75%	cytoplasmic	yes	strong	>75%	cytoplasmic	yes	strong	>75%	cytoplasmic	yes	negative	not set	not set	yes	strong	>75%	cytoplasmic	yes	strong	>75%	cytoplasmic	yes	strong	>75%	cytoplasmic	yes	strong	>75%	cytoplasmic
ENSG00000205531	CAB011567	yes	moderate	75%-25%	nuclear	yes	weak	>75%	cytoplasmic,membrane	yes	negative	not set	not set	yes	negative	not set	not set	yes	strong	75%-25%	cytoplasmic,membrane	yes	negative	not set	not set	yes	negative	not set	not set	yes	strong	75%-25%	cytoplasmic,membrane
ENSG00000165699	CAB011568	yes	moderate	>75%	cytoplasmic	yes	moderate	75%-25%	cytoplasmic	yes	negative	not set	not set	yes	negative	not set	not set	yes	negative	not set	not set	yes	negative	not set	not set	yes	weak	75%-25%	cytoplasmic	yes	moderate	75%-25%	cytoplasmic
ENSG00000100307	CAB011574	yes	negative	not set	not set	yes	negative	not set	not set	yes	moderate	75%-25%	cytoplasmic,membrane	yes	moderate	<25%	nuclear	yes	negative	not set	not set	yes	moderate	<25%	cytoplasmic,membrane	yes	negative	not set	not set	yes	negative	not set	not set
ENSG00000173473	CAB011576	yes	strong	75%-25%	nuclear	yes	negative	not set	not set	yes	strong	>75%	nuclear	yes	moderate	<25%	nuclear	yes	strong	>75%	nuclear	yes	strong	>75%	nuclear	yes	strong	>75%	nuclear	yes	strong	>75%	nuclear
ENSG00000008086	CAB011577	yes	strong	75%-25%	nuclear	yes	weak	>75%	cytoplasmic,membrane	yes	negative	not set	not set	yes	negative	not set	not set	yes	negative	not set	not set	yes	negative	not set	not set	yes	moderate	>75%	nuclear	yes	negative	not set	not set
ENSG00000128272	CAB011596	yes	moderate	<25%	cytoplasmic,nuclear	yes	negative	not set	not set	yes	moderate	<25%	nuclear	yes	negative	not set	not set	yes	moderate	75%-25%	nuclear	yes	negative	not set	not set	yes	negative	not set	not set	yes	moderate	<25%	nuclear
ENSG00000146047	CAB011603	yes	moderate	>75%	cytoplasmic	yes	strong	>75%	nuclear	yes	strong	>75%	nuclear	yes	negative	not set	not set	yes	strong	>75%	nuclear	yes	negative	not set	not set	yes	negative	not set	not set	yes	strong	>75%	nuclear
ENSG00000076351	CAB011614	yes	weak	75%-25%	cytoplasmic	yes	negative	not set	not set	yes	moderate	75%-25%	cytoplasmic,membrane	yes	negative	not set	not set	yes	negative	not set	not set	yes	negative	not set	not set	yes	negative	not set	not set	yes	strong	>75%	cytoplasmic,membrane
ENSG00000070501	CAB011616	yes	weak	75%-25%	cytoplasmic	yes	negative	not set	not set	yes	weak	<25%	nuclear	yes	negative	not set	not set	yes	moderate	<25%	nuclear	yes	strong	75%-25%	nuclear	yes	negative	not set	not set	yes	strong	>75%	nuclear
ENSG00000186834	CAB011625	yes	strong	75%-25%	nuclear	yes	negative	not set	not set	yes	negative	not set	not set	yes	strong	<25%	nuclear	yes	strong	>75%	nuclear	yes	negative	not set	not set	yes	strong	>75%	nuclear	yes	negative	not set	not set
ENSG00000125817	CAB011626	yes	moderate	<25%	cytoplasmic	yes	negative	not set	not set	yes	weak	<25%	nuclear	yes	negative	not set	not set	yes	weak	<25%	nuclear	yes	negative	not set	not set	yes	negative	not set	not set	yes	moderate	<25%	nuclear
ENSG00000167851	HPA011645	yes	moderate	>75%	cytoplasmic	yes	moderate	>75%	cytoplasmic,membrane	yes	moderate	75%-25%	cytoplasmic	yes	negative	not set	not set	yes	negative	not set	not set	yes	moderate	>75%	cytoplasmic	yes	negative	not set	not set	yes	moderate	75%-25%	cytoplasmic
ENSG00000125347	CAB011662	yes	moderate	>75%	cytoplasmic	yes	negative	not set	not set	yes	strong	75%-25%	nuclear	yes	negative	not set	not set	yes	negative	not set	not set	yes	moderate	>75%	nuclear	yes	moderate	>75%	cytoplasmic	yes	negative	not set	not set
ENSG00000019549	CAB011671	yes	moderate	>75%	cytoplasmic,nuclear	yes	negative	not set	not set	yes	moderate	75%-25%	nuclear	yes	negative	not set	not set	yes	moderate	>75%	nuclear	yes	negative	not set	not set	yes	negative	not set	not set	yes	moderate	>75%	nuclear
ENSG00000140694	CAB011673	yes	moderate	>75%	cytoplasmic,nuclear	yes	negative	not set	not set	yes	moderate	75%-25%	nuclear	yes	negative	not set	not set	yes	strong	75%-25%	nuclear	yes	negative	not set	not set	yes	moderate	>75%	nuclear	yes	strong	75%-25%	nuclear
ENSG00000125944	CAB011687	yes	strong	>75%	nuclear	yes	strong	>75%	nuclear	yes	strong	>75%	nuclear	yes	strong	>75%	nuclear	yes	strong	>75%	nuclear	yes	strong	>75%	nuclear	yes	strong	>75%	nuclear	yes	strong	>75%	nuclear
ENSG00000136527	CAB011692	yes	strong	>75%	nuclear	yes	negative	not set	not set	yes	strong	75%-25%	nuclear	yes	moderate	75%-25%	nuclear	yes	strong	>75%	nuclear	yes	strong	75%-25%	nuclear	yes	moderate	>75%	nuclear	yes	strong	>75%	nuclear
ENSG00000170515	CAB011711	yes	moderate	>75%	cytoplasmic	yes	moderate	>75%	cytoplasmic	yes	moderate	>75%	cytoplasmic	yes	negative	not set	not set	yes	moderate	>75%	cytoplasmic	yes	moderate	>75%	cytoplasmic,nuclear	yes	moderate	>75%	cytoplasmic	yes	moderate	>75%	cytoplasmic
ENSG00000196591	HPA011727	yes	strong	75%-25%	nuclear	yes	weak	>75%	cytoplasmic	yes	strong	>75%	nuclear	yes	negative	not set	not set	yes	strong	>75%	nuclear	yes	strong	>75%	nuclear	yes	strong	>75%	cytoplasmic,nuclear	yes	strong	>75%	nuclear
ENSG00000198420	HPA011732	yes	moderate	75%-25%	cytoplasmic	yes	negative	not set	not set	yes	negative	not set	not set	yes	strong	>75%	cytoplasmic	yes	negative	not set	not set	yes	moderate	75%-25%	cytoplasmic,membrane	yes	negative	not set	not set	yes	negative	not set	not set
ENSG00000102755	HPA011740	yes	negative	not set	not set	yes	negative	not set	not set	yes	negative	not set	not set	yes	moderate	>75%	cytoplasmic,membrane	yes	negative	not set	not set	yes	negative	not set	not set	yes	moderate	>75%	nuclear	yes	negative	not set	not set
ENSG00000152495	HPA011753	yes	moderate	>75%	cytoplasmic	yes	weak	>75%	cytoplasmic,membrane	yes	negative	not set	not set	yes	negative	not set	not set	yes	negative	not set	not set	yes	moderate	75%-25%	nuclear	yes	weak	75%-25%	cytoplasmic	yes	negative	not set	not set
ENSG00000063015	HPA011777	yes	moderate	75%-25%	cytoplasmic	yes	negative	not set	not set	yes	negative	not set	not set	yes	negative	not set	not set	yes	negative	not set	not set	yes	negative	not set	not set	yes	moderate	<25%	cytoplasmic	yes	negative	not set	not set
ENSG00000108821	HPA011795	yes	strong	75%-25%	cytoplasmic,membrane	yes	negative	not set	not set	yes	negative	not set	not set	yes	negative	not set	not set	yes	moderate	75%-25%	cytoplasmic	yes	negative	not set	not set	yes	negative	not set	not set	yes	strong	<25%	cytoplasmic
ENSG00000135829	CAB011819	yes	strong	75%-25%	nuclear	yes	negative	not set	not set	yes	strong	>75%	nuclear	yes	negative	not set	not set	yes	moderate	<25%	nuclear	yes	strong	75%-25%	nuclear	yes	moderate	75%-25%	nuclear	yes	strong	>75%	nuclear
ENSG00000144749	HPA011846	yes	moderate	75%-25%	cytoplasmic	yes	negative	not set	not set	yes	negative	not set	not set	yes	negative	not set	not set	yes	negative	not set	not set	yes	negative	not set	not set	yes	strong	>75%	cytoplasmic	yes	negative	not set	not set
ENSG00000107897	HPA011861	yes	strong	75%-25%	cytoplasmic	yes	negative	not set	not set	yes	negative	not set	not set	yes	negative	not set	not set	yes	negative	not set	not set	yes	negative	not set	not set	yes	strong	75%-25%	cytoplasmic	yes	negative	not set	not set
ENSG00000106991	HPA011862	yes	moderate	>75%	cytoplasmic	yes	moderate	75%-25%	cytoplasmic,membrane	yes	negative	not set	not set	yes	negative	not set	not set	yes	negative	not set	not set	yes	negative	not set	not set	yes	negative	not set	not set	yes	negative	not set	not set
ENSG00000158290	HPA011880	yes	moderate	<25%	nuclear	yes	negative	not set	not set	yes	negative	not set	not set	yes	negative	not set	not set	yes	negative	not set	not set	yes	strong	<25%	nuclear	yes	moderate	75%-25%	nuclear	yes	negative	not set	not set
ENSG00000101236	HPA011900	yes	moderate	75%-25%	cytoplasmic	yes	moderate	<25%	cytoplasmic	yes	negative	not set	not set	yes	moderate	75%-25%	cytoplasmic	yes	negative	not set	not set	yes	negative	not set	not set	yes	negative	not set	not set	yes	moderate	75%-25%	cytoplasmic
ENSG00000159082	HPA011916	yes	negative	not set	not set	yes	moderate	75%-25%	cytoplasmic	yes	moderate	<25%	cytoplasmic	yes	negative	not set	not set	yes	negative	not set	not set	yes	negative	not set	not set	yes	negative	not set	not set	yes	strong	<25%	cytoplasmic
ENSG00000135052	HPA011929	yes	moderate	75%-25%	cytoplasmic	yes	negative	not set	not set	yes	moderate	<25%	cytoplasmic	yes	negative	not set	not set	yes	moderate	<25%	cytoplasmic	yes	moderate	<25%	cytoplasmic	yes	negative	not set	not set	yes	negative	not set	not set
ENSG00000137500	HPA011931	yes	strong	>75%	cytoplasmic,membrane	yes	moderate	>75%	cytoplasmic,membrane	yes	strong	>75%	cytoplasmic,membrane	yes	negative	not set	not set	yes	strong	>75%	cytoplasmic,membrane	yes	moderate	75%-25%	cytoplasmic,membrane	yes	weak	75%-25%	cytoplasmic,membrane	yes	strong	>75%	cytoplasmic,membrane
ENSG00000106603	HPA011944	yes	strong	>75%	cytoplasmic	yes	negative	not set	not set	yes	strong	75%-25%	cytoplasmic	yes	negative	not set	not set	yes	negative	not set	not set	yes	negative	not set	not set	yes	weak	>75%	cytoplasmic	yes	negative	not set	not set
ENSG00000108018	HPA011948	yes	moderate	<25%	cytoplasmic	yes	negative	not set	not set	yes	negative	not set	not set	yes	negative	not set	not set	yes	negative	not set	not set	yes	negative	not set	not set	yes	negative	not set	not set	yes	moderate	75%-25%	cytoplasmic
ENSG00000120725	HPA011949	yes	moderate	75%-25%	cytoplasmic,membrane	yes	moderate	75%-25%	cytoplasmic,membrane	yes	strong	75%-25%	cytoplasmic,membrane	yes	negative	not set	not set	yes	strong	<25%		yes	strong	>75%		yes	negative	not set	not set	yes	negative	not set	not set
ENSG00000126464	HPA011959	yes	negative	not set	not set	yes	negative	not set	not set	yes	moderate	<25%	nuclear	yes	negative	not set	not set	yes	negative	not set	not set	yes	moderate	75%-25%	nuclear	yes	negative	not set	not set	yes	moderate	<25%	cytoplasmic
ENSG00000074416	HPA011993	yes	weak	<25%	cytoplasmic,nuclear	yes	negative	not set	not set	yes	negative	not set	not set	yes	negative	not set	not set	yes	negative	not set	not set	yes	negative	not set	not set	yes	weak	<25%	cytoplasmic	yes	moderate	<25%	nuclear
ENSG00000140694	HPA012010	yes	strong	75%-25%	nuclear	yes	negative	not set	not set	yes	strong	>75%	nuclear	yes	negative	not set	not set	yes	strong	>75%	nuclear	yes	negative	not set	not set	yes	moderate	>75%	nuclear	yes	strong	>75%	nuclear
ENSG00000178568	HPA012016	yes	weak	<25%	cytoplasmic	yes	negative	not set	not set	yes	weak	<25%	nuclear	yes	negative	not set	not set	yes	negative	not set	not set	yes	negative	not set	not set	yes	negative	not set	not set	yes	strong	<25%	cytoplasmic,nuclear
ENSG00000130764	HPA012018	yes	strong	>75%	cytoplasmic	yes	negative	not set	not set	yes	moderate	75%-25%	cytoplasmic,membrane	yes	negative	not set	not set	yes	negative	not set	not set	yes	negative	not set	not set	yes	strong	>75%	cytoplasmic	yes	strong	75%-25%	cytoplasmic
ENSG00000198848	HPA012023	yes	negative	not set	not set	yes	negative	not set	not set	yes	negative	not set	not set	yes	negative	not set	not set	yes	negative	not set	not set	yes	negative	not set	not set	yes	negative	not set	not set	yes	strong	<25%	cytoplasmic
ENSG00000054118	HPA012041	yes	strong	>75%	nuclear	yes	negative	not set	not set	yes	strong	>75%	nuclear	yes	strong	>75%	nuclear	yes	strong	>75%	nuclear	yes	strong	75%-25%	nuclear	yes	strong	>75%	nuclear	yes	strong	>75%	nuclear
ENSG00000088543	HPA012105	yes	moderate	>75%	cytoplasmic	yes	negative	not set	not set	yes	negative	not set	not set	yes	negative	not set	not set	yes	negative	not set	not set	yes	negative	not set	not set	yes	moderate	75%-25%	cytoplasmic	yes	negative	not set	not set
ENSG00000167323	HPA012123	yes	negative	not set	not set	yes	negative	not set	not set	yes	negative	not set	not set	yes	negative	not set	not set	yes	negative	not set	not set	yes	negative	not set	not set	yes	strong	>75%	cytoplasmic	yes	negative	not set	not set
ENSG00000184900	CAB012180	yes	negative	not set	not set	yes	negative	not set	not set	yes	moderate	<25%	cytoplasmic	yes	negative	not set	not set	yes	moderate	<25%	nuclear	yes	strong	<25%	nuclear	yes	weak	>75%	cytoplasmic	yes	strong	>75%	nuclear
ENSG00000136518	CAB012188	yes	moderate	75%-25%	cytoplasmic	yes	negative	not set	not set	yes	moderate	75%-25%	nuclear	yes	moderate	<25%	nuclear	yes	negative	not set	not set	yes	strong	75%-25%	nuclear	yes	moderate	<25%	nuclear	yes	strong	>75%	nuclear
ENSG00000136169	CAB012190	yes	strong	>75%	nuclear	yes	negative	not set	not set	yes	negative	not set	not set	yes	negative	not set	not set	yes	strong	>75%	nuclear	yes	negative	not set	not set	yes	strong	>75%	nuclear	yes	strong	>75%	nuclear
ENSG00000165704	CAB012200	yes	weak	75%-25%	cytoplasmic	yes	negative	not set	not set	yes	negative	not set	not set	yes	negative	not set	not set	yes	negative	not set	not set	yes	negative	not set	not set	yes	strong	>75%	cytoplasmic	yes	strong	>75%	cytoplasmic
ENSG00000184557	CAB012220	yes	weak	>75%	cytoplasmic	yes	negative	not set	not set	yes	negative	not set	not set	yes	moderate	75%-25%	cytoplasmic	yes	negative	not set	not set	yes	negative	not set	not set	yes	negative	not set	not set	yes	moderate	<25%
ENSG00000158636	CAB012234	yes	moderate	>75%	nuclear	yes	negative	not set	not set	yes	moderate	>75%	nuclear	yes	negative	not set	not set	yes	moderate	>75%	nuclear	yes	moderate	>75%	nuclear	yes	moderate	>75%	nuclear	yes	moderate	>75%	nuclear
ENSG00000184897	CAB012235	yes	negative	not set	not set	yes	negative	not set	not set	yes	negative	not set	not set	yes	negative	not set	not set	yes	negative	not set	not set	yes	negative	not set	not set	yes	weak	<25%	nuclear	yes	strong	75%-25%	nuclear
ENSG00000184357	CAB012241	yes	negative	not set	not set	yes	negative	not set	not set	yes	negative	not set	not set	yes	negative	not set	not set	yes	negative	not set	not set	yes	negative	not set	not set	yes	negative	not set	not set	yes	moderate	75%-25%	nuclear
ENSG00000277075	CAB012242	yes	moderate	75%-25%	nuclear	yes	negative	not set	not set	yes	moderate	75%-25%	nuclear	yes	negative	not set	not set	yes	strong	75%-25%	nuclear	yes	negative	not set	not set	yes	weak	>75%	nuclear	yes	strong	75%-25%	nuclear
ENSG00000137575	CAB012245	yes	weak	<25%	cytoplasmic	yes	negative	not set	not set	yes	negative	not set	not set	yes	negative	not set	not set	yes	negative	not set	not set	yes	negative	not set	not set	yes	moderate	<25%	cytoplasmic	yes	negative	not set	not set
ENSG00000205581	CAB012260	yes	strong	>75%	nuclear	yes	negative	not set	not set	yes	negative	not set	not set	yes	strong	>75%	nuclear	yes	negative	not set	not set	yes	negative	not set	not set	yes	strong	>75%	nuclear	yes	negative	not set	not set
ENSG00000108468	CAB012265	yes	weak	>75%	cytoplasmic	yes	negative	not set	not set	yes	strong	75%-25%	nuclear	yes	moderate	75%-25%	nuclear	yes	strong	>75%	nuclear	yes	strong	>75%	nuclear	yes	negative	not set	not set	yes	strong	>75%	nuclear
ENSG00000173120	CAB012272	yes	strong	75%-25%	nuclear	yes	moderate	75%-25%	cytoplasmic	yes	strong	>75%	nuclear	yes	strong	75%-25%	nuclear	yes	moderate	75%-25%	nuclear	yes	strong	>75%	nuclear	yes	weak	>75%	cytoplasmic	yes	strong	>75%	nuclear
ENSG00000101868	CAB012274	yes	moderate	>75%	cytoplasmic,nuclear	yes	negative	not set	not set	yes	weak	75%-25%	nuclear	yes	negative	not set	not set	yes	strong	<25%	nuclear	yes	moderate	75%-25%	nuclear	yes	negative	not set	not set	yes	strong	<25%	nuclear
ENSG00000079785	CAB012280	yes	moderate	75%-25%	cytoplasmic	yes	negative	not set	not set	yes	weak	<25%	nuclear	yes	negative	not set	not set	yes	negative	not set	not set	yes	moderate	75%-25%	nuclear	yes	weak	>75%	cytoplasmic	yes	strong	>75%	nuclear
ENSG00000068383	HPA012285	yes	strong	>75%	cytoplasmic	yes	moderate	75%-25%	cytoplasmic	yes	negative	not set	not set	yes	negative	not set	not set	yes	negative	not set	not set	yes	negative	not set	not set	yes	weak	>75%	cytoplasmic	yes	moderate	75%-25%	cytoplasmic
ENSG00000033800	CAB012304	yes	negative	not set	not set	yes	negative	not set	not set	yes	moderate	75%-25%	nuclear	yes	negative	not set	not set	yes	strong	<25%	nuclear	yes	moderate	75%-25%	nuclear	yes	negative	not set	not set	yes	strong	75%-25%	nuclear
ENSG00000133110	HPA012306	yes	weak	<25%	cytoplasmic,membrane	yes	negative	not set	not set	yes	moderate	>75%	nuclear	yes	negative	not set	not set	yes	moderate	>75%	nuclear	yes	negative	not set	not set	yes	weak	75%-25%	cytoplasmic,membrane	yes	strong	75%-25%	nuclear
ENSG00000180537	HPA012309	yes	negative	not set	not set	yes	negative	not set	not set	yes	moderate	75%-25%	cytoplasmic	yes	negative	not set	not set	yes	negative	not set	not set	yes	moderate	>75%	cytoplasmic	yes	negative	not set	not set	yes	negative	not set	not set
ENSG00000178075	HPA012316	yes	moderate	75%-25%	cytoplasmic	yes	strong	75%-25%	cytoplasmic	yes	moderate	<25%	cytoplasmic	yes	strong	>75%	cytoplasmic	yes	negative	not set	not set	yes	strong	<25%	cytoplasmic	yes	negative	not set	not set	yes	negative	not set	not set
ENSG00000121905	CAB012340	yes	negative	not set	not set	yes	negative	not set	not set	yes	negative	not set	not set	yes	negative	not set	not set	yes	negative	not set	not set	yes	negative	not set	not set	yes	weak	>75%	cytoplasmic,membrane	yes	negative	not set	not set
ENSG00000130508	HPA012375	yes	moderate	<25%	cytoplasmic	yes	moderate	<25%	cytoplasmic	yes	negative	not set	not set	yes	negative	not set	not set	yes	negative	not set	not set	yes	negative	not set	not set	yes	negative	not set	not set	yes	negative	not set	not set
ENSG00000111405	HPA012388	yes	weak	>75%	cytoplasmic,membrane	yes	negative	not set	not set	yes	negative	not set	not set	yes	negative	not set	not set	yes	negative	not set	not set	yes	weak	75%-25%	cytoplasmic,membrane	yes	weak	75%-25%	cytoplasmic,membrane	yes	moderate	<25%	cytoplasmic,membrane
ENSG00000122566	CAB012403	yes	strong	>75%	nuclear	yes	negative	not set	not set	yes	strong	>75%	nuclear	yes	moderate	75%-25%	nuclear	yes	moderate	>75%	nuclear	yes	strong	75%-25%	nuclear	yes	moderate	>75%	nuclear	yes	strong	>75%	nuclear
ENSG00000171603	HPA012412	yes	weak	>75%	cytoplasmic	yes	negative	not set	not set	yes	negative	not set	not set	yes	negative	not set	not set	yes	negative	not set	not set	yes	negative	not set	not set	yes	weak	75%-25%	cytoplasmic	yes	negative	not set	not set
ENSG00000183207	CAB012432	yes	moderate	>75%	nuclear	yes	negative	not set	not set	yes	strong	75%-25%	nuclear	yes	moderate	75%-25%	nuclear	yes	strong	<25%	nuclear	yes	strong	>75%	nuclear	yes	negative	not set	not set	yes	strong	75%-25%	nuclear
ENSG00000110107	CAB012448	yes	strong	75%-25%	nuclear	yes	negative	not set	not set	yes	negative	not set	not set	yes	negative	not set	not set	yes	strong	75%-25%	nuclear	yes	strong	75%-25%	nuclear	yes	strong	>75%	nuclear	yes	strong	>75%	nuclear
ENSG00000155827	CAB012478	yes	strong	>75%	nuclear	yes	negative	not set	not set	yes	strong	>75%	nuclear	yes	moderate	75%-25%	nuclear	yes	strong	75%-25%	nuclear	yes	strong	75%-25%	nuclear	yes	strong	>75%	nuclear	yes	negative	not set	not set
ENSG00000105695	HPA012499	yes	weak	75%-25%	cytoplasmic	yes	negative	not set	not set	yes	strong	75%-25%	cytoplasmic	yes	negative	not set	not set	yes	negative	not set	not set	yes	strong	>75%	cytoplasmic	yes	negative	not set	not set	yes	negative	not set	not set
ENSG00000131467	HPA012510	yes	strong	>75%	nuclear	yes	negative	not set	not set	yes	moderate	75%-25%	nuclear	yes	negative	not set	not set	yes	moderate	75%-25%	nuclear	yes	strong	75%-25%	nuclear	yes	negative	not set	not set	yes	strong	75%-25%	nuclear
ENSG00000157036	HPA012531	yes	strong	>75%	cytoplasmic,membrane	yes	negative	not set	not set	yes	strong	>75%	cytoplasmic,membrane	yes	negative	not set	not set	yes	strong	75%-25%	cytoplasmic,membrane	yes	strong	>75%	cytoplasmic,membrane	yes	negative	not set	not set	yes	strong	75%-25%	cytoplasmic,membrane
ENSG00000157315	HPA012532	yes	weak	75%-25%	cytoplasmic	yes	strong	<25%	nuclear	yes	negative	not set	not set	yes	negative	not set	not set	yes	negative	not set	not set	yes	strong	75%-25%	nuclear	yes	negative	not set	not set	yes	negative	not set	not set
ENSG00000026950	HPA012565	yes	strong	>75%	cytoplasmic	yes	negative	not set	not set	yes	negative	not set	not set	yes	negative	not set	not set	yes	negative	not set	not set	yes	negative	not set	not set	yes	moderate	75%-25%	cytoplasmic	yes	negative	not set	not set
ENSG00000122642	HPA012595	yes	moderate	75%-25%	cytoplasmic	yes	negative	not set	not set	yes	negative	not set	not set	yes	negative	not set	not set	yes	negative	not set	not set	yes	negative	not set	not set	yes	weak	75%-25%	cytoplasmic	yes	negative	not set	not set
ENSG00000089199	HPA012602	yes	negative	not set	not set	yes	negative	not set	not set	yes	negative	not set	not set	yes	negative	not set	not set	yes	negative	not set	not set	yes	negative	not set	not set	yes	moderate	<25%	nuclear	yes	negative	not set	not set
ENSG00000059573	HPA012604	yes	negative	not set	not set	yes	negative	not set	not set	yes	moderate	<25%	cytoplasmic	yes	negative	not set	not set	yes	moderate	<25%	cytoplasmic	yes	negative	not set	not set	yes	negative	not set	not set	yes	strong	75%-25%	cytoplasmic
ENSG00000152291	HPA012609	yes	strong	75%-25%	cytoplasmic	yes	negative	not set	not set	yes	moderate	75%-25%	cytoplasmic	yes	negative	not set	not set	yes	negative	not set	not set	yes	negative	not set	not set	yes	moderate	>75%	cytoplasmic	yes	strong	<25%	cytoplasmic
ENSG00000165959	HPA012634	yes	weak	75%-25%	cytoplasmic,membrane	yes	strong	>75%	cytoplasmic,membrane,nuclear	yes	weak	75%-25%	cytoplasmic,membrane	yes	negative	not set	not set	yes	weak	<25%	cytoplasmic,membrane,nuclear	yes	moderate	>75%	cytoplasmic,membrane	yes	negative	not set	not set	yes	moderate	<25%	cytoplasmic,membrane,nuclear
ENSG00000130035,ENSG00000255639	HPA012638	yes	weak	75%-25%	cytoplasmic	yes	moderate	>75%	cytoplasmic	yes	strong	75%-25%	membrane	yes	negative	not set	not set	yes	strong	75%-25%	membrane	yes	strong	>75%	cytoplasmic,nuclear	yes	weak	75%-25%	cytoplasmic	yes	strong	>75%	membrane
ENSG00000177595	CAB012647	yes	negative	not set	not set	yes	negative	not set	not set	yes	moderate	75%-25%	cytoplasmic	yes	negative	not set	not set	yes	moderate	75%-25%	cytoplasmic	yes	moderate	<25%	nuclear	yes	weak	>75%	cytoplasmic	yes	negative	not set	not set
ENSG00000179914	CAB012652	yes	weak	75%-25%	cytoplasmic,nuclear	yes	negative	not set	not set	yes	negative	not set	not set	yes	negative	not set	not set	yes	negative	not set	not set	yes	negative	not set	not set	yes	negative	not set	not set	yes	strong	75%-25%	cytoplasmic,nuclear
ENSG00000091409	HPA012696	yes	negative	not set	not set	yes	negative	not set	not set	yes	negative	not set	not set	yes	negative	not set	not set	yes	moderate	75%-25%	cytoplasmic,membrane	yes	negative	not set	not set	yes	weak	>75%	cytoplasmic,membrane	yes	moderate	75%-25%	cytoplasmic,membrane
ENSG00000165280	HPA012728	yes	strong	>75%	cytoplasmic,nuclear	yes	strong	>75%	cytoplasmic,nuclear	yes	strong	>75%	cytoplasmic,nuclear	yes	strong	75%-25%	nuclear	yes	strong	>75%	cytoplasmic,nuclear	yes	strong	>75%	cytoplasmic,nuclear	yes	strong	>75%	cytoplasmic,nuclear	yes	strong	>75%	cytoplasmic,nuclear
ENSG00000147255	HPA012732	yes	negative	not set	not set	yes	negative	not set	not set	yes	moderate	<25%	cytoplasmic,membrane	yes	negative	not set	not set	yes	negative	not set	not set	yes	moderate	75%-25%	cytoplasmic,membrane	yes	negative	not set	not set	yes	negative	not set	not set
ENSG00000124570	HPA012736	yes	strong	>75%	cytoplasmic,nuclear	yes	strong	>75%	cytoplasmic	yes	strong	75%-25%	cytoplasmic	yes	weak	75%-25%	cytoplasmic	yes	strong	>75%	cytoplasmic	yes	strong	>75%	cytoplasmic	yes	negative	not set	not set	yes	strong	>75%	cytoplasmic
ENSG00000101152	HPA012737	yes	weak	>75%	cytoplasmic	yes	negative	not set	not set	yes	negative	not set	not set	yes	negative	not set	not set	yes	negative	not set	not set	yes	negative	not set	not set	yes	moderate	>75%	cytoplasmic	yes	negative	not set	not set
ENSG00000111319	HPA012743	yes	moderate	75%-25%	cytoplasmic	yes	negative	not set	not set	yes	negative	not set	not set	yes	negative	not set	not set	yes	negative	not set	not set	yes	negative	not set	not set	yes	strong	<25%	membrane	yes	negative	not set	not set
ENSG00000130202	HPA012759	yes	negative	not set	not set	yes	negative	not set	not set	yes	negative	not set	not set	yes	negative	not set	not set	yes	negative	not set	not set	yes	negative	not set	not set	yes	strong	75%-25%	membrane	yes	negative	not set	not set
ENSG00000170473	CAB012803	yes	moderate	<25%	cytoplasmic	yes	negative	not set	not set	yes	moderate	<25%	nuclear	yes	negative	not set	not set	yes	negative	not set	not set	yes	strong	75%-25%	nuclear	yes	negative	not set	not set	yes	strong	75%-25%	nuclear
ENSG00000165280	HPA012814	yes	strong	>75%	cytoplasmic,nuclear	yes	strong	>75%	cytoplasmic	yes	strong	>75%	cytoplasmic,nuclear	yes	negative	not set	not set	yes	strong	>75%	cytoplasmic,nuclear	yes	strong	>75%	cytoplasmic,nuclear	yes	strong	>75%	cytoplasmic,nuclear	yes	strong	>75%	cytoplasmic,nuclear
ENSG00000106392	HPA012819	yes	strong	75%-25%	cytoplasmic	yes	negative	not set	not set	yes	negative	not set	not set	yes	moderate	75%-25%	cytoplasmic	yes	negative	not set	not set	yes	negative	not set	not set	yes	moderate	>75%	cytoplasmic	yes	negative	not set	not set
ENSG00000166432	HPA012827	yes	weak	<25%	cytoplasmic	yes	negative	not set	not set	yes	negative	not set	not set	yes	negative	not set	not set	yes	negative	not set	not set	yes	negative	not set	not set	yes	strong	<25%	cytoplasmic	yes	negative	not set	not set
ENSG00000135709	HPA012866	yes	strong	>75%	cytoplasmic	yes	moderate	<25%	cytoplasmic	yes	negative	not set	not set	yes	moderate	<25%	cytoplasmic	yes	negative	not set	not set	yes	negative	not set	not set	yes	moderate	75%-25%	cytoplasmic	yes	negative	not set	not set
ENSG00000115526	HPA012884	yes	moderate	>75%	cytoplasmic,membrane	yes	moderate	75%-25%	cytoplasmic,membrane	yes	weak	>75%	cytoplasmic,membrane	yes	negative	not set	not set	yes	strong	>75%	cytoplasmic,nuclear	yes	weak	>75%	cytoplasmic,membrane	yes	weak	75%-25%	cytoplasmic	yes	strong	>75%	cytoplasmic,nuclear
ENSG00000141378	HPA012897	yes	strong	>75%	cytoplasmic	yes	moderate	>75%	cytoplasmic	yes	moderate	75%-25%	cytoplasmic	yes	negative	not set	not set	yes	moderate	75%-25%	cytoplasmic	yes	moderate	75%-25%	cytoplasmic	yes	moderate	>75%	cytoplasmic	yes	strong	>75%	cytoplasmic
ENSG00000143153	HPA012911	yes	negative	not set	not set	yes	negative	not set	not set	yes	negative	not set	not set	yes	negative	not set	not set	yes	negative	not set	not set	yes	negative	not set	not set	yes	moderate	75%-25%	membrane	yes	negative	not set	not set
ENSG00000166920	HPA012943	yes	negative	not set	not set	yes	strong	>75%	cytoplasmic,membrane	yes	strong	>75%	cytoplasmic,membrane	yes	negative	not set	not set	yes	negative	not set	not set	yes	strong	>75%	cytoplasmic,membrane	yes	negative	not set	not set	yes	negative	not set	not set
ENSG00000182013	HPA012956	yes	weak	>75%	cytoplasmic,nuclear	yes	weak	75%-25%	cytoplasmic	yes	strong	>75%	cytoplasmic	yes	negative	not set	not set	yes	strong	<25%	nuclear	yes	strong	>75%	cytoplasmic	yes	negative	not set	not set	yes	strong	<25%	nuclear
ENSG00000181163	CAB012983	yes	strong	>75%	nuclear	yes	negative	not set	not set	yes	strong	>75%	nuclear	yes	strong	>75%	nuclear	yes	strong	>75%	nuclear	yes	strong	>75%	nuclear	yes	strong	>75%	nuclear	yes	strong	>75%	nuclear
ENSG00000112081	CAB012986	yes	strong	>75%	nuclear	yes	negative	not set	not set	yes	strong	>75%	nuclear	yes	strong	>75%	nuclear	yes	strong	>75%	nuclear	yes	strong	>75%	nuclear	yes	strong	>75%	nuclear	yes	strong	>75%	nuclear
ENSG00000185043	CAB012991	yes	weak	75%-25%	cytoplasmic	yes	moderate	>75%	cytoplasmic	yes	negative	not set	not set	yes	negative	not set	not set	yes	negative	not set	not set	yes	moderate	>75%	cytoplasmic	yes	negative	not set	not set	yes	negative	not set	not set
ENSG00000111142	CAB013025	yes	moderate	>75%	cytoplasmic	yes	strong	>75%	cytoplasmic,membrane	yes	negative	not set	not set	yes	negative	not set	not set	yes	negative	not set	not set	yes	negative	not set	not set	yes	negative	not set	not set	yes	negative	not set	not set
ENSG00000170315	CAB013048	yes	moderate	<25%	cytoplasmic,nuclear	yes	negative	not set	not set	yes	negative	not set	not set	yes	negative	not set	not set	yes	negative	not set	not set	yes	negative	not set	not set	yes	strong	>75%	nuclear	yes	negative	not set	not set
ENSG00000268651	CAB013061	yes	negative	not set	not set	yes	negative	not set	not set	yes	strong	>75%	cytoplasmic,membrane	yes	negative	not set	not set	yes	strong	>75%	cytoplasmic,membrane	yes	negative	not set	not set	yes	negative	not set	not set	yes	strong	>75%	cytoplasmic,membrane
ENSG00000136935	CAB013065	yes	moderate	75%-25%	cytoplasmic	yes	negative	not set	not set	yes	strong	75%-25%	cytoplasmic	yes	negative	not set	not set	yes	moderate	<25%	cytoplasmic	yes	moderate	<25%	cytoplasmic	yes	moderate	75%-25%	cytoplasmic	yes	moderate	>75%	cytoplasmic
ENSG00000152234	CAB013067	yes	strong	>75%	cytoplasmic	yes	negative	not set	not set	yes	strong	75%-25%	cytoplasmic	yes	negative	not set	not set	yes	negative	not set	not set	yes	negative	not set	not set	yes	strong	>75%	cytoplasmic	yes	strong	>75%	cytoplasmic
ENSG00000136450	CAB013073	yes	moderate	<25%	nuclear	yes	negative	not set	not set	yes	strong	>75%	nuclear	yes	strong	<25%	nuclear	yes	strong	>75%	nuclear	yes	strong	>75%	nuclear	yes	strong	>75%	nuclear	yes	strong	>75%	nuclear
ENSG00000123374	CAB013115	yes	weak	75%-25%	cytoplasmic,membrane	yes	negative	not set	not set	yes	moderate	rare	nuclear	yes	negative	not set	not set	yes	negative	not set	not set	yes	negative	not set	not set	yes	negative	not set	not set	yes	moderate	75%-25%	nuclear
ENSG00000136634	CAB013120	yes	negative	not set	not set	yes	moderate	<25%	cytoplasmic	yes	strong	<25%	nuclear	yes	moderate	75%-25%	cytoplasmic	yes	negative	not set	not set	yes	negative	not set	not set	yes	moderate	<25%	cytoplasmic	yes	moderate	<25%	nuclear
ENSG00000181195	HPA013138	yes	negative	not set	not set	yes	negative	not set	not set	yes	negative	not set	not set	yes	negative	not set	not set	yes	negative	not set	not set	yes	negative	not set	not set	yes	negative	not set	not set	yes	moderate	75%-25%	membrane
ENSG00000177324	HPA013142	yes	negative	not set	not set	yes	negative	not set	not set	yes	strong	75%-25%	nuclear	yes	negative	not set	not set	yes	moderate	<25%	nuclear	yes	negative	not set	not set	yes	negative	not set	not set	yes	negative	not set	not set
ENSG00000124164	HPA013144	yes	strong	>75%	cytoplasmic	yes	negative	not set	not set	yes	moderate	>75%	cytoplasmic	yes	negative	not set	not set	yes	strong	>75%	cytoplasmic	yes	negative	not set	not set	yes	weak	>75%	cytoplasmic	yes	strong	>75%	cytoplasmic
ENSG00000115306	HPA013149	yes	moderate	>75%	cytoplasmic	yes	negative	not set	not set	yes	strong	<25%	cytoplasmic,membrane	yes	strong	>75%	cytoplasmic	yes	negative	not set	not set	yes	negative	not set	not set	yes	negative	not set	not set	yes	negative	not set	not set
ENSG00000013297	HPA013166	yes	weak	<25%	cytoplasmic	yes	negative	not set	not set	yes	negative	not set	not set	yes	negative	not set	not set	yes	negative	not set	not set	yes	negative	not set	not set	yes	strong	>75%	cytoplasmic,membrane	yes	negative	not set	not set
ENSG00000074356	HPA013195	yes	moderate	>75%	cytoplasmic	yes	moderate	>75%	nuclear	yes	strong	>75%	nuclear	yes	strong	>75%	nuclear	yes	strong	>75%	nuclear	yes	strong	>75%	nuclear	yes	strong	>75%	nuclear	yes	strong	>75%	nuclear
ENSG00000163932	CAB013225	yes	negative	>75%	cytoplasmic	yes	negative	not set	not set	yes	negative	not set	not set	yes	negative	not set	not set	yes	negative	not set	not set	yes	negative	not set	not set	yes	moderate	>75%	cytoplasmic	yes	negative	not set	not set
ENSG00000112742	CAB013229	yes	weak	>75%	cytoplasmic	yes	negative	not set	not set	yes	strong	>75%	cytoplasmic,nuclear	yes	negative	not set	not set	yes	moderate	<25%	cytoplasmic,nuclear	yes	moderate	75%-25%	nuclear	yes	negative	not set	not set	yes	strong	<25%	cytoplasmic,nuclear
ENSG00000105289	CAB013244	yes	negative	not set	not set	yes	negative	not set	not set	yes	negative	not set	not set	yes	negative	not set	not set	yes	negative	not set	not set	yes	negative	not set	not set	yes	moderate	75%-25%	membrane	yes	negative	not set	not set
ENSG00000151150	CAB013249	yes	negative	not set	not set	yes	strong	>75%	cytoplasmic,membrane	yes	negative	not set	not set	yes	negative	not set	not set	yes	negative	not set	not set	yes	strong	>75%	cytoplasmic,membrane	yes	negative	not set	not set	yes	negative	not set	not set
ENSG00000071655	CAB013265	yes	negative	not set	not set	yes	negative	not set	not set	yes	moderate	<25%	nuclear	yes	negative	not set	not set	yes	moderate	<25%	nuclear	yes	negative	not set	not set	yes	negative	not set	not set	yes	strong	75%-25%	nuclear
ENSG00000188816	CAB013268	yes	weak	75%-25%	cytoplasmic	yes	negative	not set	not set	yes	negative	not set	not set	yes	negative	not set	not set	yes	negative	not set	not set	yes	negative	not set	not set	yes	negative	not set	not set	yes	moderate	<25%	cytoplasmic
ENSG00000184349	CAB013282	yes	strong	>75%	cytoplasmic,membrane	yes	negative	not set	not set	yes	negative	not set	not set	yes	negative	not set	not set	yes	negative	not set	not set	yes	negative	not set	not set	yes	strong	>75%	cytoplasmic,nuclear	yes	negative	not set	not set
ENSG00000149503	CAB013292	yes	moderate	<25%	cytoplasmic	yes	negative	not set	not set	yes	strong	<25%	nuclear	yes	negative	not set	not set	yes	strong	<25%	nuclear	yes	negative	not set	not set	yes	negative	not set	not set	yes	negative	not set	not set
ENSG00000076242	CAB013294	yes	moderate	<25%	nuclear	yes	negative	not set	not set	yes	moderate	75%-25%	nuclear	yes	negative	not set	not set	yes	moderate	>75%	nuclear	yes	moderate	75%-25%	nuclear	yes	negative	not set	not set	yes	strong	>75%	nuclear
ENSG00000140575	CAB013302	yes	moderate	75%-25%	cytoplasmic	yes	negative	not set	not set	yes	negative	not set	not set	yes	negative	not set	not set	yes	negative	not set	not set	yes	negative	not set	not set	yes	negative	not set	not set	yes	negative	not set	not set
ENSG00000157103	HPA013341	yes	moderate	>75%	cytoplasmic,membrane	yes	negative	not set	not set	yes	negative	not set	not set	yes	negative	not set	not set	yes	moderate	75%-25%	cytoplasmic,membrane	yes	negative	not set	not set	yes	weak	>75%	cytoplasmic	yes	moderate	75%-25%	cytoplasmic,membrane
ENSG00000134982	HPA013349	yes	moderate	75%-25%	cytoplasmic	yes	negative	not set	not set	yes	negative	not set	not set	yes	negative	not set	not set	yes	negative	not set	not set	yes	negative	not set	not set	yes	negative	not set	not set	yes	moderate	>75%	cytoplasmic
ENSG00000185008	HPA013371	yes	weak	<25%	cytoplasmic	yes	negative	not set	not set	yes	negative	not set	not set	yes	negative	not set	not set	yes	negative	not set	not set	yes	negative	not set	not set	yes	negative	not set	not set	yes	moderate	75%-25%	cytoplasmic,membrane
ENSG00000121749	HPA013388	yes	moderate	>75%	cytoplasmic	yes	negative	not set	not set	yes	strong	<25%	cytoplasmic	yes	negative	not set	not set	yes	strong	75%-25%	cytoplasmic	yes	strong	>75%	cytoplasmic	yes	weak	>75%	cytoplasmic	yes	strong	75%-25%	cytoplasmic
ENSG00000129219	HPA013397	yes	weak	75%-25%	cytoplasmic	yes	weak	75%-25%	cytoplasmic	yes	negative	not set	not set	yes	negative	not set	not set	yes	strong	<25%	cytoplasmic	yes	negative	not set	not set	yes	negative	not set	not set	yes	strong	>75%	cytoplasmic
ENSG00000183662	HPA013407	yes	moderate	<25%	cytoplasmic	yes	negative	not set	not set	yes	negative	not set	not set	yes	negative	not set	not set	yes	negative	not set	not set	yes	negative	not set	not set	yes	negative	not set	not set	yes	strong	<25%	cytoplasmic
ENSG00000134882	HPA013448	yes	moderate	>75%	cytoplasmic,membrane	yes	weak	>75%	cytoplasmic,membrane	yes	strong	>75%	cytoplasmic,membrane	yes	negative	not set	not set	yes	negative	not set	not set	yes	strong	>75%	cytoplasmic,membrane	yes	weak	>75%	cytoplasmic,membrane	yes	negative	not set	not set
ENSG00000183423	HPA013454	yes	moderate	75%-25%	cytoplasmic	yes	negative	not set	not set	yes	negative	not set	not set	yes	negative	not set	not set	yes	negative	not set	not set	yes	negative	not set	not set	yes	negative	not set	not set	yes	moderate	75%-25%	cytoplasmic
ENSG00000170854	CAB013458	yes	moderate	75%-25%	nuclear	yes	negative	not set	not set	yes	strong	<25%	nuclear	yes	negative	not set	not set	yes	moderate	75%-25%	nuclear	yes	negative	not set	not set	yes	negative	not set	not set	yes	strong	75%-25%	nuclear
ENSG00000104369	CAB013461	yes	negative	not set	not set	yes	negative	not set	not set	yes	negative	not set	not set	yes	negative	not set	not set	yes	negative	not set	not set	yes	negative	not set	not set	yes	negative	not set	not set	yes	strong	75%-25%	cytoplasmic
ENSG00000138363	CAB013462	yes	moderate	>75%	cytoplasmic	yes	weak	<25%	cytoplasmic	yes	negative	not set	not set	yes	negative	not set	not set	yes	negative	not set	not set	yes	negative	not set	not set	yes	weak	>75%	cytoplasmic	yes	strong	>75%	nuclear
ENSG00000140968	CAB013480	yes	moderate	75%-25%	nuclear	yes	negative	not set	not set	yes	negative	not set	not set	yes	negative	not set	not set	yes	moderate	75%-25%	nuclear	yes	negative	not set	not set	yes	negative	not set	not set	yes	moderate	75%-25%	nuclear
ENSG00000089220	CAB013493	yes	strong	>75%	cytoplasmic	yes	negative	not set	not set	yes	negative	not set	not set	yes	negative	not set	not set	yes	negative	not set	not set	yes	negative	not set	not set	yes	moderate	75%-25%	cytoplasmic	yes	negative	not set	not set
ENSG00000011304	CAB013507	yes	strong	>75%	nuclear	yes	negative	not set	not set	yes	negative	not set	not set	yes	strong	75%-25%	nuclear	yes	strong	>75%	nuclear	yes	negative	not set	not set	yes	strong	>75%	nuclear	yes	strong	>75%	nuclear
ENSG00000148737	CAB013535	yes	strong	75%-25%	nuclear	yes	negative	not set	not set	yes	negative	not set	not set	yes	moderate	75%-25%	nuclear	yes	negative	not set	not set	yes	negative	not set	not set	yes	moderate	75%-25%	nuclear	yes	strong	>75%	nuclear
ENSG00000128617	HPA013562	yes	negative	not set	not set	yes	moderate	75%-25%	cytoplasmic,membrane	yes	negative	not set	not set	yes	negative	not set	not set	yes	negative	not set	not set	yes	weak	75%-25%	cytoplasmic,membrane	yes	negative	not set	not set	yes	negative	not set	not set
ENSG00000127946	HPA013606	yes	moderate	>75%	cytoplasmic	yes	moderate	>75%	cytoplasmic	yes	moderate	>75%	cytoplasmic	yes	negative	not set	not set	yes	strong	>75%	cytoplasmic	yes	moderate	>75%	cytoplasmic	yes	weak	>75%	cytoplasmic	yes	strong	>75%	cytoplasmic,nuclear
ENSG00000128641	HPA013607	yes	moderate	>75%	cytoplasmic,membrane	yes	strong	>75%	cytoplasmic,membrane	yes	moderate	>75%	cytoplasmic,membrane	yes	negative	not set	not set	yes	moderate	75%-25%	cytoplasmic,membrane	yes	moderate	>75%	cytoplasmic,membrane	yes	negative	not set	not set	yes	strong	75%-25%	cytoplasmic,membrane
ENSG00000187391	HPA013650	yes	moderate	>75%	cytoplasmic	yes	negative	not set	not set	yes	moderate	75%-25%	cytoplasmic	yes	negative	not set	not set	yes	negative	not set	not set	yes	strong	>75%	cytoplasmic	yes	negative	not set	not set	yes	negative	not set	not set
ENSG00000135506	HPA013694	yes	moderate	>75%	cytoplasmic	yes	weak	>75%	cytoplasmic	yes	strong	>75%	cytoplasmic	yes	negative	not set	not set	yes	strong	>75%	cytoplasmic	yes	strong	>75%	cytoplasmic	yes	moderate	>75%	cytoplasmic	yes	strong	>75%	cytoplasmic
ENSG00000164985	CAB013718	yes	negative	not set	not set	yes	negative	not set	not set	yes	strong	75%-25%	nuclear	yes	negative	not set	not set	yes	moderate	<25%	nuclear	yes	strong	<25%	nuclear	yes	negative	not set	not set	yes	strong	>75%	nuclear
ENSG00000186106	HPA013758	yes	negative	not set	not set	yes	moderate	75%-25%	cytoplasmic,membrane	yes	negative	not set	not set	yes	negative	not set	not set	yes	negative	not set	not set	yes	negative	not set	not set	yes	negative	not set	not set	yes	negative	not set	not set
ENSG00000144648	HPA013819	yes	weak	>75%	cytoplasmic,membrane	yes	moderate	75%-25%	cytoplasmic,membrane	yes	weak	75%-25%	cytoplasmic,membrane	yes	negative	not set	not set	yes	negative	not set	not set	yes	moderate	75%-25%	cytoplasmic,membrane	yes	negative	not set	not set	yes	negative	not set	not set
ENSG00000130545	HPA013835	yes	weak	<25%	cytoplasmic,membrane	yes	negative	not set	not set	yes	negative	not set	not set	yes	negative	not set	not set	yes	negative	not set	not set	yes	negative	not set	not set	yes	moderate	>75%	cytoplasmic,membrane	yes	negative	not set	not set
ENSG00000241106	HPA013846	yes	negative	not set	not set	yes	negative	not set	not set	yes	moderate	75%-25%	cytoplasmic,membrane	yes	negative	not set	not set	yes	negative	not set	not set	yes	weak	75%-25%	cytoplasmic,membrane	yes	negative	not set	not set	yes	negative	not set	not set
ENSG00000161905	HPA013859	yes	negative	not set	not set	yes	negative	not set	not set	yes	negative	not set	not set	yes	negative	not set	not set	yes	negative	not set	not set	yes	strong	75%-25%	nuclear	yes	negative	not set	not set	yes	negative	not set	not set
ENSG00000146426	HPA013903	yes	moderate	>75%	cytoplasmic	yes	strong	>75%	cytoplasmic	yes	strong	75%-25%	cytoplasmic	yes	negative	not set	not set	yes	strong	75%-25%	cytoplasmic	yes	strong	>75%	cytoplasmic	yes	negative	not set	not set	yes	strong	75%-25%	cytoplasmic
ENSG00000076053	HPA013993	yes	moderate	75%-25%	cytoplasmic,membrane	yes	weak	>75%	cytoplasmic,membrane	yes	strong	>75%	cytoplasmic,membrane	yes	moderate	>75%	cytoplasmic,membrane	yes	negative	not set	not set	yes	moderate	75%-25%	nuclear	yes	negative	not set	not set	yes	negative	not set	not set
ENSG00000078114	HPA013994	yes	negative	not set	not set	yes	negative	not set	not set	yes	negative	not set	not set	yes	negative	not set	not set	yes	negative	not set	not set	yes	negative	not set	not set	yes	negative	not set	not set	yes	strong	>75%	cytoplasmic
ENSG00000103154	HPA013998	yes	negative	not set	not set	yes	negative	not set	not set	yes	negative	not set	not set	yes	negative	not set	not set	yes	moderate	75%-25%	cytoplasmic,membrane	yes	negative	not set	not set	yes	negative	not set	not set	yes	moderate	75%-25%	cytoplasmic,membrane
ENSG00000102468	HPA014011	yes	negative	not set	not set	yes	negative	not set	not set	yes	negative	not set	not set	yes	negative	not set	not set	yes	moderate	>75%	cytoplasmic,membrane	yes	negative	not set	not set	yes	negative	not set	not set	yes	moderate	>75%	cytoplasmic,membrane
ENSG00000121764	HPA014018	yes	weak	>75%	cytoplasmic,membrane	yes	strong	>75%	nuclear	yes	negative	not set	not set	yes	negative	not set	not set	yes	negative	not set	not set	yes	strong	>75%	nuclear	yes	negative	not set	not set	yes	negative	not set	not set
ENSG00000131634	HPA014028	yes	negative	not set	not set	yes	negative	not set	not set	yes	moderate	<25%	cytoplasmic	yes	negative	not set	not set	yes	negative	not set	not set	yes	moderate	75%-25%	nuclear	yes	negative	not set	not set	yes	negative	not set	not set
ENSG00000196968	HPA014033	yes	strong	>75%	cytoplasmic	yes	strong	>75%	cytoplasmic	yes	moderate	>75%	cytoplasmic	yes	negative	not set	not set	yes	strong	>75%	cytoplasmic	yes	strong	>75%	cytoplasmic	yes	moderate	>75%	cytoplasmic	yes	strong	>75%	cytoplasmic
ENSG00000008282	HPA014141	yes	moderate	75%-25%	cytoplasmic	yes	strong	>75%	cytoplasmic	yes	strong	>75%	cytoplasmic	yes	negative	not set	not set	yes	strong	<25%	cytoplasmic	yes	strong	>75%	cytoplasmic	yes	negative	not set	not set	yes	strong	<25%	cytoplasmic
ENSG00000159348	HPA014147	yes	strong	>75%	cytoplasmic	yes	negative	not set	not set	yes	negative	not set	not set	yes	negative	not set	not set	yes	negative	not set	not set	yes	negative	not set	not set	yes	strong	>75%	cytoplasmic	yes	negative	not set	not set
ENSG00000188425	HPA014190	yes	moderate	>75%	cytoplasmic	yes	strong	75%-25%	cytoplasmic	yes	negative	not set	not set	yes	negative	not set	not set	yes	negative	not set	not set	yes	negative	not set	not set	yes	negative	not set	not set	yes	negative	not set	not set
ENSG00000124212	HPA014193	yes	moderate	>75%	cytoplasmic,membrane	yes	moderate	<25%	cytoplasmic	yes	weak	75%-25%	cytoplasmic,membrane	yes	negative	not set	not set	yes	weak	75%-25%	cytoplasmic,membrane	yes	negative	not set	not set	yes	negative	not set	not set	yes	strong	75%-25%	cytoplasmic,membrane
ENSG00000144320	HPA014205	yes	strong	>75%	cytoplasmic,membrane	yes	strong	>75%	cytoplasmic,membrane	yes	strong	>75%	cytoplasmic,membrane	yes	strong	75%-25%	cytoplasmic	yes	weak	75%-25%	cytoplasmic	yes	strong	>75%	cytoplasmic,membrane	yes	negative	not set	not set	yes	moderate	75%-25%	cytoplasmic
ENSG00000104381	HPA014266	yes	moderate	75%-25%	cytoplasmic	yes	moderate	75%-25%	cytoplasmic,membrane	yes	moderate	75%-25%	cytoplasmic	yes	negative	not set	not set	yes	negative	not set	not set	yes	moderate	75%-25%	cytoplasmic	yes	negative	not set	not set	yes	negative	not set	not set
ENSG00000136536	HPA014275	yes	moderate	>75%	cytoplasmic	yes	negative	not set	not set	yes	negative	not set	not set	yes	negative	not set	not set	yes	moderate	<25%	cytoplasmic	yes	negative	not set	not set	yes	negative	not set	not set	yes	moderate	<25%	cytoplasmic
ENSG00000164919	HPA014295	yes	strong	>75%	cytoplasmic	yes	moderate	75%-25%	cytoplasmic	yes	strong	>75%	cytoplasmic,membrane	yes	negative	not set	not set	yes	negative	not set	not set	yes	negative	not set	not set	yes	moderate	>75%	cytoplasmic	yes	negative	not set	not set
ENSG00000023041	HPA014357	yes	strong	75%-25%	cytoplasmic	yes	negative	not set	not set	yes	negative	not set	not set	yes	strong	>75%	cytoplasmic	yes	negative	not set	not set	yes	negative	not set	not set	yes	strong	>75%	cytoplasmic	yes	negative	not set	not set
ENSG00000197430	HPA014372	yes	negative	not set	not set	yes	negative	not set	not set	yes	moderate	<25%	nuclear	yes	negative	not set	not set	yes	negative	not set	not set	yes	moderate	<25%	cytoplasmic	yes	negative	not set	not set	yes	negative	not set	not set
ENSG00000006128	HPA014429	yes	negative	not set	not set	yes	moderate	>75%	cytoplasmic,membrane	yes	negative	not set	not set	yes	negative	not set	not set	yes	negative	not set	not set	yes	negative	not set	not set	yes	negative	not set	not set	yes	negative	not set	not set
ENSG00000135709	HPA014431	yes	weak	<25%	cytoplasmic	yes	negative	not set	not set	yes	negative	not set	not set	yes	negative	not set	not set	yes	negative	not set	not set	yes	negative	not set	not set	yes	weak	>75%	cytoplasmic	yes	negative	not set	not set
ENSG00000081818	HPA014466	yes	moderate	>75%	cytoplasmic	yes	negative	not set	not set	yes	negative	not set	not set	yes	weak	75%-25%	cytoplasmic	yes	negative	not set	not set	yes	negative	not set	not set	yes	moderate	>75%	cytoplasmic,membrane,nuclear	yes	negative	not set	not set
ENSG00000171115	HPA014474	yes	moderate	>75%	cytoplasmic	yes	negative	not set	not set	yes	strong	75%-25%	cytoplasmic	yes	negative	not set	not set	yes	negative	not set	not set	yes	negative	not set	not set	yes	moderate	75%-25%	cytoplasmic	yes	strong	75%-25%	cytoplasmic
ENSG00000169181	HPA014479	yes	negative	not set	not set	yes	negative	not set	not set	yes	negative	not set	not set	yes	negative	not set	not set	yes	negative	not set	not set	yes	negative	not set	not set	yes	negative	not set	not set	yes	moderate	<25%	cytoplasmic
ENSG00000112038	HPA014509	yes	negative	not set	not set	yes	strong	75%-25%	membrane	yes	negative	not set	not set	yes	negative	not set	not set	yes	negative	not set	not set	yes	strong	<25%	membrane	yes	strong	>75%	membrane	yes	negative	not set	not set
ENSG00000113262	HPA014511	yes	negative	not set	not set	yes	negative	not set	not set	yes	negative	not set	not set	yes	negative	not set	not set	yes	moderate	75%-25%	cytoplasmic,membrane	yes	negative	not set	not set	yes	negative	not set	not set	yes	moderate	75%-25%	cytoplasmic,membrane
ENSG00000171729	HPA014547	yes	strong	>75%	cytoplasmic	yes	moderate	>75%	cytoplasmic,membrane	yes	negative	not set	not set	yes	negative	not set	not set	yes	negative	not set	not set	yes	negative	not set	not set	yes	weak	75%-25%	cytoplasmic	yes	moderate	>75%	cytoplasmic
ENSG00000137038	HPA014585	yes	negative	not set	not set	yes	negative	not set	not set	yes	negative	not set	not set	yes	negative	not set	not set	yes	negative	not set	not set	yes	negative	not set	not set	yes	moderate	75%-25%	cytoplasmic	yes	negative	not set	not set
ENSG00000154174	HPA014589	yes	moderate	>75%	cytoplasmic,membrane	yes	strong	>75%	cytoplasmic,membrane	yes	negative	not set	not set	yes	negative	not set	not set	yes	moderate	<25%	cytoplasmic	yes	strong	>75%	cytoplasmic,membrane	yes	weak	>75%	cytoplasmic,membrane	yes	moderate	75%-25%	cytoplasmic
ENSG00000165406	HPA014597	yes	weak	75%-25%	cytoplasmic,membrane	yes	negative	not set	not set	yes	negative	not set	not set	yes	negative	not set	not set	yes	negative	not set	not set	yes	negative	not set	not set	yes	strong	>75%	cytoplasmic,membrane	yes	negative	not set	not set
ENSG00000244187	HPA014615	yes	strong	>75%	cytoplasmic,membrane	yes	negative	not set	not set	yes	negative	not set	not set	yes	weak	75%-25%	cytoplasmic	yes	negative	not set	not set	yes	negative	not set	not set	yes	strong	>75%	cytoplasmic,membrane	yes	negative	not set	not set
ENSG00000177542	HPA014662	yes	moderate	75%-25%	cytoplasmic	yes	negative	not set	not set	yes	negative	not set	not set	yes	negative	not set	not set	yes	negative	not set	not set	yes	weak	<25%	cytoplasmic	yes	weak	>75%	cytoplasmic	yes	strong	>75%	cytoplasmic
ENSG00000198818	HPA014677	yes	negative	not set	not set	yes	moderate	>75%	cytoplasmic,membrane	yes	negative	not set	not set	yes	strong	>75%	cytoplasmic	yes	negative	not set	not set	yes	negative	not set	not set	yes	negative	not set	not set	yes	moderate	75%-25%	cytoplasmic
ENSG00000140497	HPA014699	yes	strong	>75%	cytoplasmic	yes	moderate	>75%	cytoplasmic	yes	negative	not set	not set	yes	negative	not set	not set	yes	negative	not set	not set	yes	negative	not set	not set	yes	negative	not set	not set	yes	negative	not set	not set
ENSG00000181885	HPA014703	yes	negative	not set	not set	yes	weak	<25%	cytoplasmic	yes	moderate	<25%	cytoplasmic	yes	negative	not set	not set	yes	negative	not set	not set	yes	negative	not set	not set	yes	negative	not set	not set	yes	strong	75%-25%	cytoplasmic,nuclear
ENSG00000170088	HPA014717	yes	strong	>75%	cytoplasmic	yes	negative	not set	not set	yes	negative	not set	not set	yes	negative	not set	not set	yes	negative	not set	not set	yes	negative	not set	not set	yes	strong	75%-25%	cytoplasmic	yes	negative	not set	not set
ENSG00000177917	HPA014743	yes	strong	>75%	membrane,nuclear	yes	negative	not set	not set	yes	negative	not set	not set	yes	moderate	75%-25%	cytoplasmic,nuclear	yes	negative	not set	not set	yes	negative	not set	not set	yes	moderate	<25%	cytoplasmic	yes	negative	not set	not set
ENSG00000008283	HPA014753	yes	weak	75%-25%	cytoplasmic	yes	weak	75%-25%	cytoplasmic	yes	negative	not set	not set	yes	weak	75%-25%	cytoplasmic	yes	negative	not set	not set	yes	negative	not set	not set	yes	negative	not set	not set	yes	negative	not set	not set
ENSG00000049656	HPA014791	yes	moderate	>75%	cytoplasmic	yes	negative	not set	not set	yes	strong	75%-25%	cytoplasmic,membrane	yes	negative	not set	not set	yes	moderate	<25%	cytoplasmic	yes	negative	not set	not set	yes	negative	not set	not set	yes	strong	75%-25%	cytoplasmic,membrane
ENSG00000074696	HPA014837	yes	strong	>75%	cytoplasmic	yes	negative	not set	not set	yes	strong	>75%	cytoplasmic	yes	negative	not set	not set	yes	moderate	<25%	cytoplasmic	yes	moderate	75%-25%	cytoplasmic	yes	negative	not set	not set	yes	moderate	75%-25%	cytoplasmic
ENSG00000175538	HPA014849	yes	moderate	75%-25%	cytoplasmic	yes	negative	not set	not set	yes	negative	not set	not set	yes	negative	not set	not set	yes	negative	not set	not set	yes	negative	not set	not set	yes	negative	not set	not set	yes	moderate	>75%	cytoplasmic
ENSG00000213782	HPA014855	yes	moderate	>75%	cytoplasmic	yes	negative	not set	not set	yes	weak	<25%	nuclear	yes	negative	not set	not set	yes	negative	not set	not set	yes	negative	not set	not set	yes	strong	<25%	nuclear	yes	moderate	75%-25%	nuclear
ENSG00000273559	CAB014874	yes	weak	<25%	cytoplasmic	yes	negative	not set	not set	yes	strong	75%-25%	nuclear	yes	moderate	<25%	nuclear	yes	moderate	75%-25%	nuclear	yes	strong	>75%	nuclear	yes	strong	75%-25%	nuclear	yes	strong	75%-25%	nuclear
ENSG00000135069	CAB014882	yes	weak	>75%	cytoplasmic	yes	negative	not set	not set	yes	negative	not set	not set	yes	negative	not set	not set	yes	negative	not set	not set	yes	negative	not set	not set	yes	moderate	>75%	cytoplasmic	yes	negative	not set	not set
ENSG00000112039	CAB014893	yes	moderate	<25%	nuclear	yes	negative	not set	not set	yes	negative	not set	not set	yes	negative	not set	not set	yes	strong	<25%	nuclear	yes	negative	not set	not set	yes	strong	75%-25%	nuclear	yes	strong	75%-25%	nuclear
ENSG00000147475	CAB014894	yes	strong	>75%	cytoplasmic,membrane	yes	strong	>75%	cytoplasmic,membrane	yes	moderate	75%-25%	cytoplasmic,membrane	yes	negative	not set	not set	yes	moderate	75%-25%	cytoplasmic	yes	strong	>75%	cytoplasmic,membrane	yes	moderate	>75%	cytoplasmic,membrane	yes	negative	not set	not set
ENSG00000083093	CAB014895	yes	strong	>75%	nuclear	yes	negative	not set	not set	yes	negative	not set	not set	yes	strong	>75%	nuclear	yes	negative	not set	not set	yes	moderate	75%-25%	nuclear	yes	weak	>75%	nuclear	yes	strong	<25%	cytoplasmic
ENSG00000162366	HPA014907	yes	moderate	75%-25%	cytoplasmic	yes	negative	not set	not set	yes	negative	not set	not set	yes	negative	not set	not set	yes	negative	not set	not set	yes	negative	not set	not set	yes	negative	not set	not set	yes	strong	75%-25%	cytoplasmic
ENSG00000070526	HPA014975	yes	negative	not set	not set	yes	negative	not set	not set	yes	negative	not set	not set	yes	negative	not set	not set	yes	negative	not set	not set	yes	strong	75%-25%	nuclear	yes	strong	>75%	membrane	yes	negative	not set	not set
ENSG00000175354	HPA015004	yes	strong	>75%	nuclear	yes	negative	not set	not set	yes	weak	75%-25%	nuclear	yes	moderate	<25%	nuclear	yes	strong	<25%	nuclear	yes	strong	<25%	nuclear	yes	moderate	<25%	nuclear	yes	strong	75%-25%	nuclear
ENSG00000131389	HPA015028	yes	negative	not set	not set	yes	negative	not set	not set	yes	negative	not set	not set	yes	negative	not set	not set	yes	negative	not set	not set	yes	negative	not set	not set	yes	moderate	75%-25%	membrane	yes	negative	not set	not set
ENSG00000141867	HPA015055	yes	weak	75%-25%	cytoplasmic	yes	moderate	>75%	cytoplasmic	yes	negative	not set	not set	yes	negative	not set	not set	yes	negative	not set	not set	yes	negative	not set	not set	yes	moderate	75%-25%	nuclear	yes	negative	not set	not set
ENSG00000164023	HPA015076	yes	moderate	>75%	cytoplasmic	yes	negative	not set	not set	yes	moderate	>75%	cytoplasmic,membrane	yes	moderate	75%-25%	cytoplasmic	yes	negative	not set	not set	yes	negative	not set	not set	yes	moderate	>75%	cytoplasmic	yes	negative	not set	not set
ENSG00000169862	HPA015077	yes	weak	<25%	cytoplasmic	yes	moderate	>75%	cytoplasmic,membrane	yes	negative	not set	not set	yes	negative	not set	not set	yes	negative	not set	not set	yes	negative	not set	not set	yes	negative	not set	not set	yes	negative	not set	not set
ENSG00000072786	HPA015083	yes	negative	not set	not set	yes	negative	not set	not set	yes	negative	not set	not set	yes	negative	not set	not set	yes	negative	not set	not set	yes	negative	not set	not set	yes	moderate	>75%	cytoplasmic	yes	negative	not set	not set
ENSG00000117791	HPA015085	yes	weak	<25%	cytoplasmic	yes	negative	not set	not set	yes	negative	not set	not set	yes	negative	not set	not set	yes	negative	not set	not set	yes	negative	not set	not set	yes	moderate	>75%	cytoplasmic	yes	negative	not set	not set
ENSG00000120160	HPA015089	yes	weak	<25%	cytoplasmic	yes	strong	>75%	membrane,nuclear	yes	weak	<25%	cytoplasmic	yes	negative	not set	not set	yes	weak	<25%	cytoplasmic	yes	strong	>75%	cytoplasmic	yes	negative	not set	not set	yes	weak	<25%	cytoplasmic
ENSG00000198053	CAB015122	yes	negative	not set	not set	yes	negative	not set	not set	yes	negative	not set	not set	yes	negative	not set	not set	yes	negative	not set	not set	yes	negative	not set	not set	yes	moderate	75%-25%	cytoplasmic	yes	moderate	<25%	cytoplasmic
ENSG00000136731	HPA015127	yes	moderate	>75%	cytoplasmic	yes	negative	not set	not set	yes	negative	not set	not set	yes	negative	not set	not set	yes	negative	not set	not set	yes	negative	not set	not set	yes	weak	75%-25%	cytoplasmic	yes	negative	not set	not set
ENSG00000185158	HPA015135	yes	weak	>75%	cytoplasmic,membrane	yes	strong	>75%	cytoplasmic,nuclear	yes	weak	75%-25%	cytoplasmic,membrane	yes	negative	not set	not set	yes	weak	75%-25%	cytoplasmic,membrane	yes	strong	>75%	cytoplasmic,membrane	yes	negative	not set	not set	yes	weak	75%-25%	cytoplasmic,membrane
ENSG00000070182	CAB015169	yes	moderate	75%-25%	cytoplasmic,membrane	yes	weak	75%-25%	cytoplasmic,membrane	yes	negative	not set	not set	yes	negative	not set	not set	yes	negative	not set	not set	yes	negative	not set	not set	yes	moderate	75%-25%	cytoplasmic,membrane	yes	negative	not set	not set
ENSG00000151150	CAB015179	yes	moderate	<25%	nuclear	yes	negative	not set	not set	yes	negative	not set	not set	yes	negative	not set	not set	yes	negative	not set	not set	yes	negative	not set	not set	yes	negative	not set	not set	yes	moderate	75%-25%
ENSG00000240065	CAB015180	yes	weak	<25%	nuclear	yes	negative	not set	not set	yes	negative	not set	not set	yes	negative	not set	not set	yes	negative	not set	not set	yes	negative	not set	not set	yes	negative	not set	not set	yes	weak	<25%	nuclear
ENSG00000167670	CAB015186	yes	negative	not set	not set	yes	negative	not set	not set	yes	strong	<25%	nuclear	yes	negative	not set	not set	yes	strong	75%-25%	nuclear	yes	negative	not set	not set	yes	negative	not set	not set	yes	strong	75%-25%	nuclear
ENSG00000162775	CAB015201	yes	moderate	75%-25%	cytoplasmic	yes	negative	not set	not set	yes	negative	not set	not set	yes	negative	not set	not set	yes	negative	not set	not set	yes	negative	not set	not set	yes	weak	75%-25%	cytoplasmic	yes	strong	<25%	nuclear
ENSG00000145555	CAB015224	yes	moderate	>75%	cytoplasmic	yes	negative	not set	not set	yes	negative	not set	not set	yes	negative	not set	not set	yes	negative	not set	not set	yes	negative	not set	not set	yes	moderate	75%-25%	cytoplasmic	yes	moderate	75%-25%	cytoplasmic
ENSG00000078808	CAB015227	yes	negative	not set	not set	yes	negative	not set	not set	yes	strong	>75%	cytoplasmic	yes	negative	not set	not set	yes	negative	not set	not set	yes	strong	>75%	cytoplasmic	yes	negative	not set	not set	yes	negative	not set	not set
ENSG00000188257	HPA015236	yes	negative	not set	not set	yes	negative	not set	not set	yes	moderate	<25%	nuclear	yes	negative	not set	not set	yes	moderate	<25%	nuclear	yes	moderate	75%-25%	nuclear	yes	negative	not set	not set	yes	negative	not set	not set
ENSG00000125991	HPA015242	yes	weak	75%-25%	cytoplasmic	yes	strong	>75%	cytoplasmic	yes	negative	not set	not set	yes	negative	not set	not set	yes	negative	not set	not set	yes	strong	<25%	cytoplasmic	yes	negative	not set	not set	yes	negative	not set	not set
ENSG00000167191	HPA015247	yes	negative	not set	not set	yes	negative	not set	not set	yes	negative	not set	not set	yes	negative	not set	not set	yes	negative	not set	not set	yes	negative	not set	not set	yes	strong	>75%	membrane	yes	negative	not set	not set
ENSG00000104312	HPA015273	yes	weak	75%-25%	cytoplasmic	yes	weak	>75%	cytoplasmic,membrane	yes	weak	>75%	cytoplasmic,membrane	yes	moderate	75%-25%	cytoplasmic	yes	strong	<25%	cytoplasmic,membrane	yes	weak	>75%	cytoplasmic,membrane	yes	weak	>75%	cytoplasmic	yes	strong	<25%	cytoplasmic,membrane
ENSG00000101115	HPA015291	yes	negative	not set	not set	yes	negative	not set	not set	yes	negative	not set	not set	yes	negative	not set	not set	yes	weak	75%-25%	nuclear	yes	negative	not set	not set	yes	negative	not set	not set	yes	strong	>75%	nuclear
ENSG00000133392	HPA015310	yes	negative	not set	not set	yes	weak	75%-25%	cytoplasmic	yes	negative	not set	not set	yes	negative	not set	not set	yes	negative	not set	not set	yes	negative	not set	not set	yes	negative	not set	not set	yes	negative	not set	not set
ENSG00000183943	HPA015324	yes	strong	75%-25%	nuclear	yes	negative	not set	not set	yes	negative	not set	not set	yes	negative	not set	not set	yes	strong	<25%	nuclear	yes	negative	not set	not set	yes	moderate	<25%	nuclear	yes	strong	75%-25%	nuclear
ENSG00000126777	CAB015331	yes	moderate	>75%	cytoplasmic	yes	negative	not set	not set	yes	strong	75%-25%	cytoplasmic	yes	negative	not set	not set	yes	negative	not set	not set	yes	negative	not set	not set	yes	strong	>75%	cytoplasmic	yes	strong	>75%	cytoplasmic
ENSG00000002822	CAB015338	yes	moderate	<25%	membrane,nuclear	yes	negative	not set	not set	yes	strong	<25%	membrane	yes	negative	not set	not set	yes	moderate	75%-25%	membrane,nuclear	yes	moderate	<25%	nuclear	yes	moderate	75%-25%	membrane,nuclear	yes	negative	not set	not set
ENSG00000185825	CAB015350	yes	moderate	>75%	cytoplasmic	yes	negative	not set	not set	yes	strong	<25%	cytoplasmic,membrane	yes	negative	not set	not set	yes	negative	not set	not set	yes	negative	not set	not set	yes	moderate	>75%	cytoplasmic	yes	negative	not set	not set
ENSG00000155438	CAB015382	yes	moderate	>75%	nuclear	yes	negative	not set	not set	yes	negative	not set	not set	yes	negative	not set	not set	yes	moderate	<25%	nuclear	yes	negative	not set	not set	yes	moderate	>75%	nuclear	yes	moderate	<25%	nuclear
ENSG00000141551	CAB015410	yes	moderate	>75%	cytoplasmic,nuclear	yes	negative	not set	not set	yes	negative	not set	not set	yes	negative	not set	not set	yes	negative	not set	not set	yes	negative	not set	not set	yes	moderate	>75%	nuclear	yes	moderate	>75%	cytoplasmic
ENSG00000138760	CAB015415	yes	strong	>75%	cytoplasmic	yes	negative	not set	not set	yes	negative	not set	not set	yes	negative	not set	not set	yes	negative	not set	not set	yes	negative	not set	not set	yes	strong	75%-25%	cytoplasmic	yes	negative	not set	not set
ENSG00000234745	CAB015418	yes	negative	not set	not set	yes	negative	not set	not set	yes	strong	75%-25%	cytoplasmic	yes	negative	not set	not set	yes	strong	75%-25%	cytoplasmic	yes	negative	not set	not set	yes	negative	not set	not set	yes	negative	not set	not set
ENSG00000171608	CAB015420	yes	moderate	75%-25%	cytoplasmic,membrane	yes	negative	not set	not set	yes	negative	not set	not set	yes	negative	not set	not set	yes	moderate	75%-25%	cytoplasmic,membrane	yes	negative	not set	not set	yes	negative	not set	not set	yes	moderate	>75%	cytoplasmic,membrane
ENSG00000167110	CAB015421	yes	weak	>75%	cytoplasmic	yes	negative	not set	not set	yes	moderate	>75%	cytoplasmic	yes	negative	not set	not set	yes	negative	not set	not set	yes	moderate	>75%	cytoplasmic	yes	negative	not set	not set	yes	negative	not set	not set
ENSG00000092208	CAB015426	yes	negative	not set	not set	yes	negative	not set	not set	yes	strong	>75%	cytoplasmic,nuclear	yes	negative	not set	not set	yes	negative	not set	not set	yes	strong	>75%	cytoplasmic,nuclear	yes	negative	not set	not set	yes	negative	not set	not set
ENSG00000064703	CAB015427	yes	negative	not set	not set	yes	moderate	75%-25%	cytoplasmic	yes	weak	75%-25%	cytoplasmic	yes	negative	not set	not set	yes	negative	not set	not set	yes	moderate	>75%	cytoplasmic	yes	negative	not set	not set	yes	negative	not set	not set
ENSG00000155495	CAB015452	yes	negative	not set	not set	yes	negative	not set	not set	yes	negative	not set	not set	yes	negative	not set	not set	yes	negative	not set	not set	yes	negative	not set	not set	yes	negative	not set	not set	yes	moderate	>75%	cytoplasmic
ENSG00000184033	CAB015453	yes	negative	not set	not set	yes	negative	not set	not set	yes	strong	>75%	cytoplasmic,membrane,nuclear	yes	negative	not set	not set	yes	strong	>75%	cytoplasmic,membrane,nuclear	yes	moderate	>75%	cytoplasmic,membrane,nuclear	yes	negative	not set	not set	yes	strong	>75%	cytoplasmic,membrane,nuclear
ENSG00000174231	CAB015457	yes	moderate	<25%	nuclear	yes	negative	not set	not set	yes	strong	75%-25%	nuclear	yes	negative	not set	not set	yes	moderate	<25%	nuclear	yes	strong	<25%	nuclear	yes	negative	not set	not set	yes	strong	>75%	nuclear
ENSG00000182481	CAB015460	yes	weak	<25%	cytoplasmic	yes	moderate	<25%	cytoplasmic	yes	strong	>75%	nuclear	yes	negative	not set	not set	yes	strong	>75%	nuclear	yes	strong	>75%	nuclear	yes	negative	not set	not set	yes	strong	>75%	nuclear
ENSG00000147202	CAB015461	yes	negative	not set	not set	yes	negative	not set	not set	yes	negative	not set	not set	yes	negative	not set	not set	yes	negative	not set	not set	yes	negative	not set	not set	yes	strong	>75%	cytoplasmic	yes	negative	not set	not set
ENSG00000180900	CAB015463	yes	weak	75%-25%	cytoplasmic	yes	negative	not set	not set	yes	negative	not set	not set	yes	negative	not set	not set	yes	negative	not set	not set	yes	negative	not set	not set	yes	moderate	<25%	membrane	yes	strong	<25%	membrane
ENSG00000144040	HPA015473	yes	weak	<25%	cytoplasmic	yes	moderate	>75%	cytoplasmic	yes	negative	not set	not set	yes	negative	not set	not set	yes	negative	not set	not set	yes	negative	not set	not set	yes	negative	not set	not set	yes	moderate	75%-25%	cytoplasmic
ENSG00000113621	HPA015483	yes	moderate	<25%	cytoplasmic	yes	negative	not set	not set	yes	moderate	75%-25%	cytoplasmic	yes	negative	not set	not set	yes	negative	not set	not set	yes	negative	not set	not set	yes	negative	not set	not set	yes	moderate	75%-25%	cytoplasmic
ENSG00000089022	HPA015515	yes	weak	75%-25%	cytoplasmic,nuclear	yes	negative	not set	not set	yes	negative	not set	not set	yes	negative	not set	not set	yes	moderate	75%-25%	nuclear	yes	negative	not set	not set	yes	negative	not set	not set	yes	moderate	75%-25%	nuclear
ENSG00000084754	HPA015536	yes	strong	>75%	cytoplasmic	yes	moderate	<25%	cytoplasmic	yes	negative	not set	not set	yes	negative	not set	not set	yes	negative	not set	not set	yes	negative	not set	not set	yes	negative	not set	not set	yes	negative	not set	not set
ENSG00000144746	HPA015540	yes	strong	>75%	cytoplasmic	yes	strong	75%-25%	nuclear	yes	negative	not set	not set	yes	negative	not set	not set	yes	negative	not set	not set	yes	strong	<25%	nuclear	yes	moderate	>75%	cytoplasmic	yes	negative	not set	not set
ENSG00000123307	HPA015545	yes	strong	>75%	cytoplasmic	yes	negative	not set	not set	yes	negative	not set	not set	yes	negative	not set	not set	yes	negative	not set	not set	yes	negative	not set	not set	yes	negative	not set	not set	yes	negative	not set	not set
ENSG00000133131	HPA015547	yes	negative	not set	not set	yes	negative	not set	not set	yes	negative	not set	not set	yes	negative	not set	not set	yes	negative	not set	not set	yes	negative	not set	not set	yes	moderate	75%-25%	nuclear	yes	moderate	75%-25%	nuclear
ENSG00000179796	HPA015568	yes	moderate	>75%	cytoplasmic	yes	negative	not set	not set	yes	moderate	75%-25%	cytoplasmic	yes	negative	not set	not set	yes	negative	not set	not set	yes	moderate	75%-25%	cytoplasmic	yes	moderate	<25%	cytoplasmic	yes	moderate	75%-25%	cytoplasmic
ENSG00000144339	HPA015587	yes	weak	>75%	cytoplasmic	yes	negative	not set	not set	yes	negative	not set	not set	yes	negative	not set	not set	yes	negative	not set	not set	yes	negative	not set	not set	yes	moderate	>75%	cytoplasmic,membrane	yes	negative	not set	not set
ENSG00000121749	HPA015592	yes	moderate	>75%	cytoplasmic	yes	negative	not set	not set	yes	negative	not set	not set	yes	negative	not set	not set	yes	negative	not set	not set	yes	negative	not set	not set	yes	moderate	>75%	cytoplasmic	yes	strong	<25%	cytoplasmic
ENSG00000126653	HPA015593	yes	strong	<25%	nuclear	yes	negative	not set	not set	yes	strong	>75%	nuclear	yes	negative	not set	not set	yes	strong	>75%	nuclear	yes	strong	>75%	nuclear	yes	strong	>75%	nuclear	yes	strong	>75%	nuclear
ENSG00000138193	HPA015597	yes	moderate	>75%	cytoplasmic	yes	negative	not set	not set	yes	negative	not set	not set	yes	negative	not set	not set	yes	negative	not set	not set	yes	negative	not set	not set	yes	moderate	>75%	cytoplasmic	yes	negative	not set	not set
ENSG00000124299	HPA015599	yes	strong	>75%	cytoplasmic	yes	weak	>75%	cytoplasmic	yes	negative	not set	not set	yes	negative	not set	not set	yes	negative	not set	not set	yes	negative	not set	not set	yes	moderate	>75%	cytoplasmic	yes	negative	not set	not set
ENSG00000126653	HPA015603	yes	negative	not set	not set	yes	negative	not set	not set	yes	strong	75%-25%	nuclear	yes	negative	not set	not set	yes	strong	>75%	nuclear	yes	strong	>75%	nuclear	yes	moderate	>75%	nuclear	yes	negative	not set	not set
ENSG00000086300	HPA015605	yes	weak	75%-25%	cytoplasmic,nuclear	yes	weak	<25%	cytoplasmic	yes	negative	not set	not set	yes	negative	not set	not set	yes	negative	not set	not set	yes	moderate	<25%	nuclear	yes	negative	not set	not set	yes	strong	<25%	cytoplasmic,nuclear
ENSG00000137261	HPA015607	yes	negative	not set	not set	yes	moderate	75%-25%	cytoplasmic,membrane	yes	negative	not set	not set	yes	negative	not set	not set	yes	negative	not set	not set	yes	negative	not set	not set	yes	negative	not set	not set	yes	negative	not set	not set
ENSG00000097033	HPA015608	yes	negative	not set	not set	yes	negative	not set	not set	yes	negative	not set	not set	yes	negative	not set	not set	yes	negative	not set	not set	yes	strong	>75%	cytoplasmic,membrane	yes	negative	not set	not set	yes	negative	not set	not set
ENSG00000145850	HPA015625	yes	moderate	>75%	cytoplasmic	yes	moderate	75%-25%	cytoplasmic	yes	moderate	>75%	cytoplasmic	yes	negative	not set	not set	yes	negative	not set	not set	yes	moderate	>75%	cytoplasmic	yes	negative	not set	not set	yes	negative	not set	not set
ENSG00000171155	HPA015632	yes	strong	>75%	cytoplasmic,membrane	yes	strong	>75%	cytoplasmic,membrane	yes	strong	75%-25%	cytoplasmic,membrane	yes	moderate	>75%	cytoplasmic,membrane	yes	negative	not set	not set	yes	strong	>75%	cytoplasmic,membrane	yes	moderate	>75%	cytoplasmic,membrane	yes	moderate	75%-25%	cytoplasmic
ENSG00000133318	HPA015650	yes	weak	>75%	cytoplasmic	yes	weak	>75%	cytoplasmic	yes	weak	>75%	cytoplasmic	yes	weak	>75%	cytoplasmic	yes	weak	>75%	cytoplasmic	yes	weak	>75%	cytoplasmic	yes	weak	>75%	cytoplasmic	yes	weak	>75%	cytoplasmic
ENSG00000187764	HPA015662	yes	strong	>75%	cytoplasmic	yes	negative	not set	not set	yes	negative	not set	not set	yes	negative	not set	not set	yes	negative	not set	not set	yes	negative	not set	not set	yes	negative	not set	not set	yes	moderate	>75%	cytoplasmic
ENSG00000115561,ENSG00000249884	HPA015673	yes	negative	not set	not set	yes	negative	not set	not set	yes	negative	not set	not set	yes	moderate	<25%	cytoplasmic	yes	negative	not set	not set	yes	moderate	75%-25%	cytoplasmic	yes	moderate	>75%	cytoplasmic	yes	moderate	<25%	cytoplasmic
ENSG00000112769	HPA015693	yes	negative	not set	not set	yes	negative	not set	not set	yes	negative	not set	not set	yes	negative	not set	not set	yes	negative	not set	not set	yes	negative	not set	not set	yes	weak	75%-25%	cytoplasmic	yes	negative	not set	not set
ENSG00000152822	HPA015701	yes	weak	<25%	cytoplasmic	yes	moderate	<25%	cytoplasmic	yes	negative	not set	not set	yes	negative	not set	not set	yes	negative	not set	not set	yes	negative	not set	not set	yes	negative	not set	not set	yes	negative	not set	not set
ENSG00000150637	HPA015715	yes	moderate	<25%	nuclear	yes	negative	not set	not set	yes	weak	75%-25%	cytoplasmic	yes	moderate	<25%	cytoplasmic	yes	negative	not set	not set	yes	weak	75%-25%	cytoplasmic	yes	negative	not set	not set	yes	negative	not set	not set
ENSG00000116649	HPA015746	yes	weak	<25%	cytoplasmic	yes	moderate	<25%	cytoplasmic	yes	strong	<25%	cytoplasmic,membrane	yes	negative	not set	not set	yes	moderate	<25%	cytoplasmic	yes	negative	not set	not set	yes	negative	not set	not set	yes	moderate	75%-25%	cytoplasmic
ENSG00000114904	HPA015750	yes	strong	>75%	cytoplasmic	yes	negative	not set	not set	yes	moderate	75%-25%	cytoplasmic	yes	negative	not set	not set	yes	moderate	<25%	cytoplasmic	yes	moderate	<25%	cytoplasmic	yes	negative	not set	not set	yes	moderate	<25%	cytoplasmic
ENSG00000125827	HPA015752	yes	strong	>75%	membrane,nuclear	yes	strong	>75%	cytoplasmic	yes	strong	>75%	cytoplasmic	yes	negative	not set	not set	yes	strong	>75%	cytoplasmic	yes	strong	>75%	cytoplasmic	yes	strong	>75%	cytoplasmic	yes	strong	>75%	cytoplasmic
ENSG00000170390	HPA015770	yes	negative	not set	not set	yes	moderate	75%-25%	nuclear	yes	negative	not set	not set	yes	negative	not set	not set	yes	negative	not set	not set	yes	negative	not set	not set	yes	negative	not set	not set	yes	strong	<25%	cytoplasmic
ENSG00000157540	HPA015810	yes	weak	>75%	cytoplasmic	yes	moderate	>75%	cytoplasmic,membrane	yes	negative	not set	not set	yes	negative	not set	not set	yes	moderate	>75%	cytoplasmic	yes	negative	not set	not set	yes	negative	not set	not set	yes	moderate	>75%	cytoplasmic
ENSG00000065526	HPA015825	yes	strong	75%-25%	nuclear	yes	negative	not set	not set	yes	strong	>75%	nuclear	yes	moderate	75%-25%	nuclear	yes	moderate	75%-25%	nuclear	yes	strong	75%-25%	nuclear	yes	moderate	<25%	nuclear	yes	strong	>75%	nuclear
ENSG00000137075	HPA015853	yes	moderate	rare	nuclear	yes	negative	not set	not set	yes	negative	not set	not set	yes	negative	not set	not set	yes	negative	not set	not set	yes	negative	not set	not set	yes	moderate	rare	nuclear	yes	moderate	<25%	nuclear
ENSG00000132334	HPA015870	yes	strong	>75%	cytoplasmic,membrane	yes	negative	not set	not set	yes	negative	not set	not set	yes	negative	not set	not set	yes	negative	not set	not set	yes	negative	not set	not set	yes	strong	>75%	cytoplasmic,membrane	yes	negative	not set	not set
ENSG00000151715	HPA015878	yes	moderate	>75%	cytoplasmic,membrane	yes	negative	not set	not set	yes	negative	not set	not set	yes	negative	not set	not set	yes	strong	>75%	cytoplasmic,membrane	yes	negative	not set	not set	yes	negative	not set	not set	yes	strong	>75%	cytoplasmic,membrane
ENSG00000064763	HPA015884	yes	moderate	<25%	cytoplasmic	yes	negative	not set	not set	yes	negative	not set	not set	yes	negative	not set	not set	yes	negative	not set	not set	yes	weak	<25%	nuclear	yes	negative	not set	not set	yes	strong	75%-25%	nuclear
ENSG00000164047	CAB015949	yes	weak	75%-25%	cytoplasmic	yes	negative	not set	not set	yes	negative	not set	not set	yes	negative	not set	not set	yes	negative	not set	not set	yes	moderate	75%-25%	cytoplasmic	yes	negative	not set	not set	yes	negative	not set	not set
ENSG00000198561	HPA015955	yes	weak	>75%	cytoplasmic	yes	negative	not set	not set	yes	negative	not set	not set	yes	negative	not set	not set	yes	negative	not set	not set	yes	negative	not set	not set	yes	strong	>75%	cytoplasmic,membrane	yes	negative	not set	not set
ENSG00000124302	HPA016004	yes	moderate	>75%	cytoplasmic,membrane	yes	negative	not set	not set	yes	negative	not set	not set	yes	negative	not set	not set	yes	moderate	75%-25%	nuclear	yes	negative	not set	not set	yes	negative	not set	not set	yes	moderate	75%-25%	nuclear
ENSG00000025156	CAB016067	yes	weak	<25%	cytoplasmic	yes	negative	not set	not set	yes	moderate	<25%	nuclear	yes	negative	not set	not set	yes	strong	<25%	nuclear	yes	negative	not set	not set	yes	negative	not set	not set	yes	strong	75%-25%	nuclear
ENSG00000148926	CAB016075	yes	moderate	75%-25%	cytoplasmic	yes	moderate	75%-25%	cytoplasmic,membrane	yes	moderate	75%-25%	cytoplasmic,membrane	yes	negative	not set	not set	yes	moderate	75%-25%	cytoplasmic,membrane	yes	negative	not set	not set	yes	negative	not set	not set	yes	moderate	75%-25%	cytoplasmic,membrane
ENSG00000099783	CAB016113	yes	strong	>75%	nuclear	yes	negative	not set	not set	yes	strong	>75%	nuclear	yes	strong	>75%	nuclear	yes	strong	>75%	nuclear	yes	strong	>75%	nuclear	yes	strong	>75%	nuclear	yes	strong	>75%	nuclear
ENSG00000149187	CAB016114	yes	moderate	<25%	nuclear	yes	negative	not set	not set	yes	strong	75%-25%	nuclear	yes	negative	not set	not set	yes	strong	75%-25%	nuclear	yes	strong	<25%	nuclear	yes	strong	>75%	nuclear	yes	strong	>75%	nuclear
ENSG00000144554	CAB016117	yes	moderate	<25%	nuclear	yes	negative	not set	not set	yes	strong	75%-25%	nuclear	yes	negative	not set	not set	yes	strong	75%-25%	nuclear	yes	negative	not set	not set	yes	negative	not set	not set	yes	strong	75%-25%	nuclear
ENSG00000058668	CAB016118	yes	strong	75%-25%	cytoplasmic,membrane	yes	negative	not set	not set	yes	strong	75%-25%	cytoplasmic,membrane	yes	negative	not set	not set	yes	strong	75%-25%	cytoplasmic,membrane	yes	strong	75%-25%	cytoplasmic,membrane	yes	strong	75%-25%	cytoplasmic	yes	strong	>75%	cytoplasmic,membrane
ENSG00000139190	CAB016119	yes	weak	75%-25%	cytoplasmic	yes	negative	not set	not set	yes	moderate	75%-25%	cytoplasmic	yes	negative	not set	not set	yes	negative	not set	not set	yes	negative	not set	not set	yes	negative	not set	not set	yes	negative	not set	not set
ENSG00000154920	CAB016127	yes	moderate	>75%	cytoplasmic,nuclear	yes	negative	not set	not set	yes	strong	>75%	nuclear	yes	negative	not set	not set	yes	strong	>75%	nuclear	yes	strong	>75%	nuclear	yes	negative	not set	not set	yes	moderate	>75%	nuclear
ENSG00000110400	CAB016135	yes	weak	<25%	cytoplasmic	yes	negative	not set	not set	yes	negative	not set	not set	yes	negative	not set	not set	yes	negative	not set	not set	yes	moderate	75%-25%	nuclear	yes	negative	not set	not set	yes	negative	not set	not set
ENSG00000164442	CAB016157	yes	strong	<25%	nuclear	yes	negative	not set	not set	yes	strong	>75%	nuclear	yes	moderate	<25%	nuclear	yes	strong	>75%	nuclear	yes	strong	>75%	nuclear	yes	strong	>75%	nuclear	yes	strong	>75%	nuclear
ENSG00000099889	CAB016162	yes	negative	not set	not set	yes	negative	not set	not set	yes	negative	not set	not set	yes	negative	not set	not set	yes	negative	not set	not set	yes	negative	not set	not set	yes	negative	not set	not set	yes	moderate	<25%	cytoplasmic
ENSG00000182185	CAB016191	yes	moderate	<25%	nuclear	yes	negative	not set	not set	yes	strong	75%-25%	nuclear	yes	moderate	<25%	nuclear	yes	strong	75%-25%	nuclear	yes	strong	>75%	nuclear	yes	negative	not set	not set	yes	strong	>75%	nuclear
ENSG00000241837	CAB016209	yes	strong	>75%	cytoplasmic	yes	moderate	<25%	cytoplasmic	yes	moderate	75%-25%	cytoplasmic	yes	negative	not set	not set	yes	negative	not set	not set	yes	negative	not set	not set	yes	negative	not set	not set	yes	strong	75%-25%	cytoplasmic
ENSG00000123268	CAB016222	yes	moderate	>75%	nuclear	yes	negative	not set	not set	yes	negative	not set	not set	yes	negative	not set	not set	yes	negative	not set	not set	yes	strong	>75%	nuclear	yes	moderate	>75%	nuclear	yes	negative	not set	not set
ENSG00000165119	CAB016225	yes	strong	>75%	cytoplasmic,nuclear	yes	weak	>75%	cytoplasmic	yes	strong	>75%	nuclear	yes	strong	>75%	nuclear	yes	strong	>75%	nuclear	yes	strong	>75%	nuclear	yes	strong	>75%	nuclear	yes	strong	>75%	nuclear
ENSG00000198712	CAB016243	yes	strong	>75%	cytoplasmic	yes	negative	not set	not set	yes	strong	75%-25%	cytoplasmic	yes	negative	not set	not set	yes	strong	<25%	cytoplasmic	yes	negative	not set	not set	yes	moderate	75%-25%	cytoplasmic	yes	strong	75%-25%	cytoplasmic
ENSG00000164919	CAB016244	yes	moderate	75%-25%	cytoplasmic	yes	negative	not set	not set	yes	strong	75%-25%	cytoplasmic	yes	negative	not set	not set	yes	negative	not set	not set	yes	negative	not set	not set	yes	negative	not set	not set	yes	negative	not set	not set
ENSG00000183684	CAB016281	yes	strong	>75%	nuclear	yes	negative	not set	not set	yes	strong	>75%	nuclear	yes	strong	>75%	nuclear	yes	strong	>75%	nuclear	yes	strong	>75%	nuclear	yes	strong	>75%	nuclear	yes	strong	>75%	nuclear
ENSG00000147133	CAB016283	yes	moderate	75%-25%	nuclear	yes	negative	not set	not set	yes	negative	not set	not set	yes	moderate	75%-25%	nuclear	yes	strong	>75%	nuclear	yes	negative	not set	not set	yes	moderate	>75%	nuclear	yes	negative	not set	not set
ENSG00000135679	CAB016303	yes	negative	not set	not set	yes	strong	>75%	nuclear	yes	strong	>75%	nuclear	yes	strong	>75%	nuclear	yes	strong	>75%	nuclear	yes	strong	>75%	nuclear	yes	moderate	>75%	cytoplasmic,nuclear	yes	strong	>75%	nuclear
ENSG00000140464	CAB016304	yes	moderate	75%-25%	nuclear	yes	negative	not set	not set	yes	negative	not set	not set	yes	strong	>75%	nuclear	yes	negative	not set	not set	yes	negative	not set	not set	yes	moderate	75%-25%	nuclear	yes	negative	not set	not set
ENSG00000160691	CAB016305	yes	moderate	>75%	cytoplasmic	yes	negative	not set	not set	yes	moderate	>75%	cytoplasmic	yes	negative	not set	not set	yes	moderate	>75%	cytoplasmic	yes	moderate	>75%	cytoplasmic	yes	moderate	>75%	cytoplasmic	yes	strong	>75%	cytoplasmic
ENSG00000075711	CAB016307	yes	moderate	75%-25%	cytoplasmic	yes	negative	not set	not set	yes	negative	not set	not set	yes	negative	not set	not set	yes	negative	not set	not set	yes	negative	not set	not set	yes	negative	not set	not set	yes	moderate	>75%	cytoplasmic,membrane
ENSG00000166508	CAB016312	yes	negative	not set	not set	yes	negative	not set	not set	yes	strong	>75%	nuclear	yes	negative	not set	not set	yes	strong	75%-25%	nuclear	yes	strong	75%-25%	nuclear	yes	weak	>75%	cytoplasmic	yes	strong	>75%	nuclear
ENSG00000004897	CAB016315	yes	negative	not set	not set	yes	negative	not set	not set	yes	negative	not set	not set	yes	negative	not set	not set	yes	negative	not set	not set	yes	negative	not set	not set	yes	strong	75%-25%	nuclear	yes	strong	>75%	nuclear
ENSG00000104824	CAB016326	yes	strong	>75%	nuclear	yes	negative	not set	not set	yes	strong	>75%	nuclear	yes	strong	>75%	nuclear	yes	strong	>75%	nuclear	yes	strong	>75%	nuclear	yes	strong	>75%	nuclear	yes	strong	>75%	nuclear
ENSG00000162231	CAB016327	yes	moderate	<25%	nuclear	yes	negative	not set	not set	yes	strong	>75%	nuclear	yes	moderate	75%-25%	nuclear	yes	strong	>75%	nuclear	yes	strong	>75%	nuclear	yes	strong	>75%	nuclear	yes	strong	>75%	nuclear
ENSG00000091651	CAB016330	yes	weak	>75%	cytoplasmic	yes	negative	not set	not set	yes	strong	>75%	nuclear	yes	negative	not set	not set	yes	strong	>75%	nuclear	yes	negative	not set	not set	yes	negative	not set	not set	yes	moderate	>75%	nuclear
ENSG00000173473	CAB016336	yes	weak	>75%	cytoplasmic	yes	negative	not set	not set	yes	strong	>75%	nuclear	yes	negative	not set	not set	yes	strong	>75%	nuclear	yes	moderate	75%-25%	nuclear	yes	negative	not set	not set	yes	strong	>75%	nuclear
ENSG00000172543	CAB016345	yes	moderate	>75%	cytoplasmic	yes	negative	not set	not set	yes	negative	not set	not set	yes	negative	not set	not set	yes	negative	not set	not set	yes	negative	not set	not set	yes	moderate	75%-25%	cytoplasmic	yes	negative	not set	not set
ENSG00000152818	CAB016348	yes	strong	<25%	cytoplasmic,membrane	yes	negative	not set	not set	yes	negative	not set	not set	yes	negative	not set	not set	yes	negative	not set	not set	yes	negative	not set	not set	yes	strong	<25%	cytoplasmic,membrane	yes	negative	not set	not set
ENSG00000173402	CAB016353	yes	moderate	75%-25%	cytoplasmic	yes	negative	not set	not set	yes	moderate	75%-25%	cytoplasmic	yes	moderate	75%-25%	cytoplasmic,membrane	yes	negative	not set	not set	yes	negative	not set	not set	yes	negative	not set	not set	yes	negative	not set	not set
ENSG00000114270	CAB016357	yes	weak	75%-25%	cytoplasmic	yes	negative	not set	not set	yes	negative	not set	not set	yes	negative	not set	not set	yes	negative	not set	not set	yes	negative	not set	not set	yes	moderate	>75%	cytoplasmic	yes	negative	not set	not set
ENSG00000186318	CAB016358	yes	moderate	>75%	cytoplasmic	yes	negative	not set	not set	yes	negative	not set	not set	yes	negative	not set	not set	yes	moderate	>75%	cytoplasmic	yes	negative	not set	not set	yes	negative	not set	not set	yes	moderate	>75%	cytoplasmic
ENSG00000134371	CAB016359	yes	negative	not set	not set	yes	negative	not set	not set	yes	moderate	<25%	nuclear	yes	negative	not set	not set	yes	negative	not set	not set	yes	strong	75%-25%	nuclear	yes	negative	not set	not set	yes	strong	<25%	nuclear
ENSG00000086288	CAB016416	yes	moderate	>75%	cytoplasmic	yes	strong	>75%	cytoplasmic,membrane,nuclear	yes	weak	>75%	cytoplasmic,membrane,nuclear	yes	negative	not set	not set	yes	weak	>75%	cytoplasmic,membrane,nuclear	yes	strong	>75%	cytoplasmic,membrane,nuclear	yes	weak	>75%	cytoplasmic,membrane,nuclear	yes	moderate	75%-25%	cytoplasmic,membrane,nuclear
ENSG00000182134	HPA016419	yes	moderate	>75%	cytoplasmic	yes	negative	not set	not set	yes	strong	>75%	cytoplasmic	yes	negative	not set	not set	yes	strong	>75%	cytoplasmic	yes	strong	>75%	cytoplasmic	yes	negative	not set	not set	yes	strong	>75%	cytoplasmic
ENSG00000185798	HPA016420	yes	negative	not set	not set	yes	strong	75%-25%	cytoplasmic,membrane	yes	negative	not set	not set	yes	negative	not set	not set	yes	negative	not set	not set	yes	strong	75%-25%	cytoplasmic,membrane	yes	negative	not set	not set	yes	negative	not set	not set
ENSG00000149084	HPA016427	yes	moderate	>75%	cytoplasmic	yes	negative	not set	not set	yes	negative	not set	not set	yes	negative	not set	not set	yes	negative	not set	not set	yes	negative	not set	not set	yes	moderate	>75%	cytoplasmic	yes	negative	not set	not set
ENSG00000166170	HPA016429	yes	negative	not set	not set	yes	strong	75%-25%	cytoplasmic	yes	negative	not set	not set	yes	negative	not set	not set	yes	negative	not set	not set	yes	negative	not set	not set	yes	negative	not set	not set	yes	weak	75%-25%	cytoplasmic
ENSG00000096063	HPA016431	yes	strong	>75%	cytoplasmic	yes	strong	>75%	cytoplasmic	yes	strong	<25%	cytoplasmic	yes	negative	not set	not set	yes	moderate	75%-25%	cytoplasmic	yes	strong	>75%	cytoplasmic	yes	moderate	<25%	cytoplasmic	yes	moderate	75%-25%	cytoplasmic
ENSG00000112659	HPA016434	yes	moderate	>75%	cytoplasmic	yes	negative	not set	not set	yes	negative	not set	not set	yes	negative	not set	not set	yes	negative	not set	not set	yes	negative	not set	not set	yes	moderate	>75%	cytoplasmic	yes	negative	not set	not set
ENSG00000140459	HPA016436	yes	strong	>75%	cytoplasmic,membrane	yes	moderate	>75%	cytoplasmic,membrane	yes	negative	not set	not set	yes	negative	not set	not set	yes	negative	not set	not set	yes	negative	not set	not set	yes	negative	not set	not set	yes	negative	not set	not set
ENSG00000091164	CAB016446	yes	strong	>75%	cytoplasmic,nuclear	yes	strong	>75%	cytoplasmic	yes	strong	75%-25%	cytoplasmic,nuclear	yes	negative	not set	not set	yes	strong	>75%	cytoplasmic,nuclear	yes	strong	>75%	cytoplasmic,nuclear	yes	moderate	>75%	cytoplasmic,nuclear	yes	strong	>75%	cytoplasmic,nuclear
ENSG00000086232	HPA016496	yes	strong	>75%	cytoplasmic	yes	negative	not set	not set	yes	negative	not set	not set	yes	negative	not set	not set	yes	negative	not set	not set	yes	negative	not set	not set	yes	negative	not set	not set	yes	moderate	75%-25%	cytoplasmic
ENSG00000104312	HPA016499	yes	moderate	75%-25%	cytoplasmic	yes	weak	75%-25%	cytoplasmic	yes	weak	75%-25%	cytoplasmic	yes	negative	not set	not set	yes	moderate	<25%	cytoplasmic	yes	weak	75%-25%	cytoplasmic	yes	negative	not set	not set	yes	moderate	<25%	cytoplasmic
ENSG00000049618	HPA016511	yes	moderate	<25%	nuclear	yes	negative	not set	not set	yes	negative	not set	not set	yes	moderate	<25%	nuclear	yes	weak	<25%	nuclear	yes	negative	not set	not set	yes	negative	not set	not set	yes	moderate	<25%	nuclear
ENSG00000165238	HPA016519	yes	strong	>75%	cytoplasmic	yes	negative	not set	not set	yes	negative	not set	not set	yes	negative	not set	not set	yes	negative	not set	not set	yes	negative	not set	not set	yes	strong	>75%	cytoplasmic	yes	strong	75%-25%	cytoplasmic
ENSG00000133020	CAB016527	yes	moderate	75%-25%	cytoplasmic,membrane	yes	negative	not set	not set	yes	negative	not set	not set	yes	negative	not set	not set	yes	negative	not set	not set	yes	negative	not set	not set	yes	moderate	>75%	cytoplasmic,membrane	yes	negative	not set	not set
ENSG00000102225	CAB016535	yes	moderate	75%-25%	cytoplasmic	yes	negative	not set	not set	yes	negative	not set	not set	yes	negative	not set	not set	yes	negative	not set	not set	yes	negative	not set	not set	yes	weak	75%-25%	cytoplasmic	yes	moderate	<25%	cytoplasmic
ENSG00000117748	CAB016538	yes	strong	>75%	nuclear	yes	negative	not set	not set	yes	strong	>75%	nuclear	yes	strong	75%-25%	nuclear	yes	strong	>75%	nuclear	yes	strong	>75%	nuclear	yes	strong	>75%	nuclear	yes	strong	>75%	nuclear
ENSG00000103479	CAB016547	yes	moderate	<25%	nuclear	yes	negative	not set	not set	yes	strong	75%-25%	nuclear	yes	moderate	<25%	nuclear	yes	strong	75%-25%	nuclear	yes	strong	<25%	nuclear	yes	negative	not set	not set	yes	strong	>75%	nuclear
ENSG00000143324	HPA016557	yes	weak	75%-25%	cytoplasmic	yes	negative	not set	not set	yes	negative	not set	not set	yes	negative	not set	not set	yes	negative	not set	not set	yes	negative	not set	not set	yes	weak	>75%	cytoplasmic	yes	strong	>75%	cytoplasmic
ENSG00000186501	HPA016579	yes	weak	>75%	cytoplasmic	yes	moderate	>75%	cytoplasmic,membrane	yes	moderate	75%-25%	cytoplasmic	yes	negative	not set	not set	yes	moderate	75%-25%	cytoplasmic	yes	moderate	75%-25%	cytoplasmic	yes	negative	not set	not set	yes	moderate	75%-25%	cytoplasmic
ENSG00000147872	HPA016607	yes	negative	not set	not set	yes	negative	not set	not set	yes	negative	not set	not set	yes	negative	not set	not set	yes	negative	not set	not set	yes	negative	not set	not set	yes	strong	>75%	cytoplasmic	yes	negative	not set	not set
ENSG00000120733	HPA016610	yes	moderate	75%-25%	cytoplasmic	yes	negative	not set	not set	yes	negative	not set	not set	yes	moderate	75%-25%	nuclear	yes	strong	>75%	nuclear	yes	negative	not set	not set	yes	negative	not set	not set	yes	strong	>75%	nuclear
ENSG00000163812	HPA016616	yes	strong	>75%	cytoplasmic	yes	negative	not set	not set	yes	negative	not set	not set	yes	negative	not set	not set	yes	negative	not set	not set	yes	negative	not set	not set	yes	strong	75%-25%	cytoplasmic	yes	negative	not set	not set
ENSG00000134830	HPA016629	yes	moderate	<25%	cytoplasmic	yes	moderate	75%-25%	cytoplasmic	yes	negative	not set	not set	yes	negative	not set	not set	yes	negative	not set	not set	yes	negative	not set	not set	yes	weak	<25%	cytoplasmic	yes	negative	not set	not set
ENSG00000075043	HPA016642	yes	negative	not set	not set	yes	negative	not set	not set	yes	negative	not set	not set	yes	negative	not set	not set	yes	negative	not set	not set	yes	negative	not set	not set	yes	strong	75%-25%	nuclear	yes	negative	not set	not set
ENSG00000149182	HPA016649	yes	moderate	>75%	cytoplasmic	yes	negative	not set	not set	yes	negative	not set	not set	yes	negative	not set	not set	yes	negative	not set	not set	yes	negative	not set	not set	yes	moderate	>75%	cytoplasmic	yes	negative	not set	not set
ENSG00000056097	HPA016666	yes	strong	>75%	nuclear	yes	negative	not set	not set	yes	strong	>75%	nuclear	yes	strong	>75%	nuclear	yes	strong	>75%	nuclear	yes	strong	>75%	nuclear	yes	strong	>75%	nuclear	yes	strong	>75%	nuclear
ENSG00000139687	CAB016687	yes	weak	75%-25%	nuclear	yes	negative	not set	not set	yes	strong	>75%	nuclear	yes	negative	not set	not set	yes	strong	>75%	nuclear	yes	negative	not set	not set	yes	strong	>75%	nuclear	yes	negative	not set	not set
ENSG00000183495	HPA016704	yes	moderate	<25%	nuclear	yes	negative	not set	not set	yes	moderate	75%-25%	nuclear	yes	negative	not set	not set	yes	strong	<25%	nuclear	yes	strong	>75%	nuclear	yes	weak	>75%	nuclear	yes	strong	75%-25%	nuclear
ENSG00000168763	HPA016711	yes	negative	not set	not set	yes	negative	not set	not set	yes	moderate	75%-25%	cytoplasmic,membrane	yes	negative	not set	not set	yes	moderate	75%-25%	cytoplasmic	yes	strong	>75%	cytoplasmic	yes	moderate	>75%	cytoplasmic	yes	strong	>75%	cytoplasmic
ENSG00000122585	CAB016733	yes	moderate	>75%	cytoplasmic	yes	negative	not set	not set	yes	negative	not set	not set	yes	negative	not set	not set	yes	negative	not set	not set	yes	negative	not set	not set	yes	negative	not set	not set	yes	moderate	<25%	cytoplasmic
ENSG00000143727	HPA016754	yes	strong	75%-25%	cytoplasmic	yes	strong	>75%	cytoplasmic	yes	negative	not set	not set	yes	negative	not set	not set	yes	negative	not set	not set	yes	negative	not set	not set	yes	strong	>75%	cytoplasmic	yes	negative	not set	not set
ENSG00000156639	HPA016755	yes	moderate	>75%	cytoplasmic	yes	negative	not set	not set	yes	negative	not set	not set	yes	negative	not set	not set	yes	negative	not set	not set	yes	negative	not set	not set	yes	weak	75%-25%	cytoplasmic	yes	negative	not set	not set
ENSG00000205403	CAB016777	yes	strong	75%-25%	cytoplasmic	yes	negative	not set	not set	yes	moderate	75%-25%	nuclear	yes	negative	not set	not set	yes	negative	not set	not set	yes	negative	not set	not set	yes	negative	not set	not set	yes	negative	not set	not set
ENSG00000181852	HPA016812	yes	weak	75%-25%	cytoplasmic,membrane	yes	strong	>75%	cytoplasmic,nuclear	yes	strong	>75%	cytoplasmic,membrane	yes	negative	not set	not set	yes	strong	>75%	cytoplasmic,membrane	yes	strong	>75%	cytoplasmic,membrane	yes	negative	not set	not set	yes	strong	>75%	cytoplasmic,membrane
ENSG00000181722	HPA016815	yes	strong	>75%	nuclear	yes	negative	not set	not set	yes	negative	not set	not set	yes	strong	75%-25%	nuclear	yes	negative	not set	not set	yes	negative	not set	not set	yes	moderate	>75%	nuclear	yes	negative	not set	not set
ENSG00000160188	HPA016816	yes	negative	not set	not set	yes	moderate	>75%	cytoplasmic	yes	negative	not set	not set	yes	negative	not set	not set	yes	negative	not set	not set	yes	negative	not set	not set	yes	negative	not set	not set	yes	negative	not set	not set
ENSG00000160214	HPA016818	yes	moderate	<25%	nuclear	yes	negative	not set	not set	yes	negative	not set	not set	yes	negative	not set	not set	yes	negative	not set	not set	yes	negative	not set	not set	yes	moderate	<25%	cytoplasmic	yes	negative	not set	not set
ENSG00000169155	HPA016825	yes	weak	75%-25%	cytoplasmic	yes	negative	not set	not set	yes	negative	not set	not set	yes	weak	75%-25%	cytoplasmic	yes	negative	not set	not set	yes	moderate	<25%	nuclear	yes	negative	not set	not set	yes	strong	<25%	nuclear
ENSG00000139291	HPA016830	yes	strong	>75%	cytoplasmic	yes	moderate	<25%	cytoplasmic,membrane	yes	negative	not set	not set	yes	negative	not set	not set	yes	negative	not set	not set	yes	negative	not set	not set	yes	negative	not set	not set	yes	strong	<25%	nuclear
ENSG00000160633	HPA016832	yes	moderate	75%-25%	cytoplasmic,nuclear	yes	strong	>75%	cytoplasmic,nuclear	yes	strong	>75%	cytoplasmic,nuclear	yes	negative	not set	not set	yes	strong	>75%	cytoplasmic,nuclear	yes	strong	>75%	cytoplasmic,nuclear	yes	strong	>75%	cytoplasmic,nuclear	yes	strong	>75%	cytoplasmic,nuclear
ENSG00000178537	HPA016862	yes	moderate	>75%	cytoplasmic,membrane	yes	moderate	>75%	cytoplasmic,membrane	yes	strong	>75%	cytoplasmic,membrane	yes	negative	not set	not set	yes	moderate	75%-25%	cytoplasmic,membrane	yes	strong	>75%	cytoplasmic,membrane	yes	weak	>75%	cytoplasmic,membrane	yes	moderate	75%-25%	cytoplasmic,membrane
ENSG00000126945,ENSG00000169045,ENSG00000169813	HPA016884	yes	moderate	75%-25%		yes	negative	not set	not set	yes	moderate	75%-25%	nuclear	yes	negative	not set	not set	yes	strong	>75%	nuclear	yes	negative	not set	not set	yes	moderate	>75%	nuclear	yes	strong	>75%	nuclear
ENSG00000100764	HPA016885	yes	moderate	<25%	nuclear	yes	moderate	75%-25%	cytoplasmic	yes	negative	not set	not set	yes	negative	not set	not set	yes	negative	not set	not set	yes	negative	not set	not set	yes	weak	75%-25%	cytoplasmic	yes	strong	75%-25%	cytoplasmic,nuclear
ENSG00000235750	HPA016895	yes	negative	not set	not set	yes	strong	>75%	cytoplasmic,membrane	yes	strong	<25%	cytoplasmic,membrane	yes	negative	not set	not set	yes	negative	not set	not set	yes	strong	>75%	cytoplasmic,membrane	yes	negative	not set	not set	yes	negative	not set	not set
ENSG00000114670	HPA016908	yes	moderate	<25%	nuclear	yes	negative	not set	not set	yes	strong	75%-25%	nuclear	yes	negative	not set	not set	yes	negative	not set	not set	yes	strong	75%-25%	nuclear	yes	negative	not set	not set	yes	negative	not set	not set
ENSG00000051620	HPA016928	yes	moderate	>75%	cytoplasmic	yes	negative	not set	not set	yes	moderate	<25%	cytoplasmic,membrane	yes	negative	not set	not set	yes	moderate	75%-25%	cytoplasmic,membrane	yes	negative	not set	not set	yes	negative	not set	not set	yes	moderate	75%-25%	cytoplasmic,membrane
ENSG00000153446	HPA016934	yes	negative	not set	not set	yes	negative	not set	not set	yes	moderate	75%-25%	nuclear	yes	negative	not set	not set	yes	negative	not set	not set	yes	weak	75%-25%	nuclear	yes	negative	not set	not set	yes	negative	not set	not set
ENSG00000135093	HPA016952	yes	moderate	>75%	cytoplasmic	yes	strong	>75%	cytoplasmic	yes	strong	75%-25%	cytoplasmic	yes	negative	not set	not set	yes	strong	75%-25%	cytoplasmic	yes	strong	>75%	cytoplasmic,nuclear	yes	moderate	>75%	cytoplasmic	yes	strong	75%-25%	cytoplasmic
ENSG00000108244	HPA016959	yes	weak	75%-25%	cytoplasmic	yes	negative	not set	not set	yes	negative	not set	not set	yes	negative	not set	not set	yes	negative	not set	not set	yes	negative	not set	not set	yes	negative	not set	not set	yes	moderate	<25%	cytoplasmic
ENSG00000110921	HPA016961	yes	strong	>75%	cytoplasmic	yes	moderate	75%-25%	cytoplasmic	yes	negative	not set	not set	yes	negative	not set	not set	yes	negative	not set	not set	yes	negative	not set	not set	yes	strong	75%-25%	cytoplasmic	yes	negative	not set	not set
ENSG00000079557	HPA017006	yes	weak	75%-25%	cytoplasmic	yes	negative	not set	not set	yes	moderate	75%-25%	nuclear	yes	negative	not set	not set	yes	strong	<25%	nuclear	yes	weak	75%-25%	nuclear	yes	negative	not set	not set	yes	moderate	<25%	nuclear
ENSG00000077420	HPA017009	yes	moderate	75%-25%	cytoplasmic	yes	negative	not set	not set	yes	negative	not set	not set	yes	negative	not set	not set	yes	negative	not set	not set	yes	negative	not set	not set	yes	strong	75%-25%	cytoplasmic	yes	negative	not set	not set
ENSG00000107438	HPA017010	yes	negative	not set	not set	yes	negative	not set	not set	yes	strong	75%-25%	nuclear	yes	negative	not set	not set	yes	strong	<25%	nuclear	yes	strong	>75%	nuclear	yes	negative	not set	not set	yes	negative	not set	not set
ENSG00000101189	HPA017012	yes	negative	not set	not set	yes	negative	not set	not set	yes	strong	>75%	nuclear	yes	negative	not set	not set	yes	negative	not set	not set	yes	strong	>75%	nuclear	yes	negative	not set	not set	yes	negative	not set	not set
ENSG00000010244	HPA017013	yes	strong	>75%	nuclear	yes	negative	not set	not set	yes	strong	>75%	nuclear	yes	strong	>75%	nuclear	yes	strong	>75%	nuclear	yes	strong	>75%	nuclear	yes	strong	>75%	nuclear	yes	strong	>75%	nuclear
ENSG00000140632	CAB017022	yes	strong	75%-25%	nuclear	yes	negative	not set	not set	yes	moderate	75%-25%	nuclear	yes	strong	75%-25%	nuclear	yes	moderate	75%-25%	nuclear	yes	strong	<25%	nuclear	yes	moderate	75%-25%	nuclear	yes	strong	>75%	nuclear
ENSG00000256525	CAB017030	yes	moderate	75%-25%	cytoplasmic	yes	negative	not set	not set	yes	negative	not set	not set	yes	negative	not set	not set	yes	strong	<25%	cytoplasmic	yes	negative	not set	not set	yes	negative	not set	not set	yes	strong	75%-25%	cytoplasmic,nuclear
ENSG00000012660	CAB017042	yes	moderate	>75%	cytoplasmic	yes	negative	not set	not set	yes	negative	not set	not set	yes	negative	not set	not set	yes	negative	not set	not set	yes	negative	not set	not set	yes	moderate	<25%	cytoplasmic	yes	negative	not set	not set
ENSG00000090520	HPA017051	yes	moderate	>75%	cytoplasmic	yes	moderate	>75%	cytoplasmic	yes	strong	75%-25%	cytoplasmic	yes	negative	not set	not set	yes	moderate	>75%	cytoplasmic	yes	moderate	>75%	cytoplasmic	yes	moderate	>75%	cytoplasmic	yes	moderate	>75%	cytoplasmic
ENSG00000155307	HPA017055	yes	strong	>75%	cytoplasmic	yes	weak	>75%	cytoplasmic,membrane	yes	negative	not set	not set	yes	negative	not set	not set	yes	negative	not set	not set	yes	negative	not set	not set	yes	weak	>75%	cytoplasmic	yes	strong	75%-25%	cytoplasmic
ENSG00000137509	HPA017065	yes	moderate	75%-25%	cytoplasmic	yes	negative	not set	not set	yes	negative	not set	not set	yes	negative	not set	not set	yes	negative	not set	not set	yes	negative	not set	not set	yes	moderate	<25%	cytoplasmic	yes	negative	not set	not set
ENSG00000127838	HPA017068	yes	strong	75%-25%	cytoplasmic	yes	negative	not set	not set	yes	moderate	75%-25%	cytoplasmic,membrane	yes	negative	not set	not set	yes	negative	not set	not set	yes	strong	>75%	nuclear	yes	negative	not set	not set	yes	negative	not set	not set
ENSG00000135636	HPA017071	yes	weak	75%-25%	cytoplasmic	yes	negative	not set	not set	yes	negative	not set	not set	yes	negative	not set	not set	yes	negative	not set	not set	yes	negative	not set	not set	yes	moderate	>75%	membrane	yes	negative	not set	not set
ENSG00000137767	HPA017079	yes	weak	75%-25%	cytoplasmic	yes	negative	not set	not set	yes	moderate	<25%	cytoplasmic	yes	negative	not set	not set	yes	moderate	<25%	cytoplasmic	yes	negative	not set	not set	yes	moderate	>75%	nuclear	yes	moderate	<25%	nuclear
ENSG00000138617	HPA017081	yes	moderate	>75%	cytoplasmic,membrane	yes	negative	not set	not set	yes	strong	75%-25%	nuclear	yes	negative	not set	not set	yes	moderate	75%-25%	nuclear	yes	strong	>75%	nuclear	yes	negative	not set	not set	yes	moderate	>75%	nuclear
ENSG00000166986	CAB017097	yes	moderate	>75%	cytoplasmic	yes	strong	<25%	cytoplasmic	yes	strong	<25%	cytoplasmic	yes	negative	not set	not set	yes	negative	not set	not set	yes	negative	not set	not set	yes	moderate	>75%	cytoplasmic	yes	strong	75%-25%	cytoplasmic
ENSG00000171793	CAB017111	yes	moderate	>75%	cytoplasmic	yes	negative	not set	not set	yes	negative	not set	not set	yes	negative	not set	not set	yes	negative	not set	not set	yes	negative	not set	not set	yes	moderate	>75%	cytoplasmic	yes	strong	>75%	cytoplasmic
ENSG00000033170	CAB017129	yes	moderate	>75%	cytoplasmic	yes	negative	not set	not set	yes	moderate	<25%	cytoplasmic	yes	negative	not set	not set	yes	negative	not set	not set	yes	strong	<25%	nuclear	yes	negative	not set	not set	yes	strong	75%-25%	cytoplasmic
ENSG00000143294	CAB017151	yes	moderate	>75%	cytoplasmic,nuclear	yes	weak	>75%	cytoplasmic	yes	strong	>75%	nuclear	yes	negative	not set	not set	yes	strong	75%-25%	nuclear	yes	strong	>75%	nuclear	yes	negative	not set	not set	yes	strong	75%-25%	nuclear
ENSG00000151176	HPA017163	yes	strong	>75%	cytoplasmic	yes	negative	not set	not set	yes	strong	<25%	cytoplasmic,membrane	yes	negative	not set	not set	yes	negative	not set	not set	yes	negative	not set	not set	yes	weak	75%-25%	cytoplasmic	yes	negative	not set	not set
ENSG00000153933	HPA017167	yes	negative	not set	not set	yes	strong	>75%	cytoplasmic	yes	negative	not set	not set	yes	moderate	75%-25%	cytoplasmic,membrane	yes	negative	not set	not set	yes	negative	not set	not set	yes	negative	not set	not set	yes	negative	not set	not set
ENSG00000186111	HPA017168	yes	negative	not set	not set	yes	moderate	>75%	cytoplasmic,membrane	yes	negative	not set	not set	yes	negative	not set	not set	yes	negative	not set	not set	yes	negative	not set	not set	yes	negative	not set	not set	yes	moderate	>75%	cytoplasmic,membrane
ENSG00000082175	HPA017176	yes	moderate	75%-25%	cytoplasmic	yes	negative	not set	not set	yes	negative	not set	not set	yes	negative	not set	not set	yes	negative	not set	not set	yes	negative	not set	not set	yes	moderate	>75%	cytoplasmic	yes	moderate	<25%	cytoplasmic
ENSG00000133026	CAB017180	yes	weak	<25%	cytoplasmic	yes	moderate	75%-25%	cytoplasmic,membrane	yes	moderate	75%-25%	cytoplasmic	yes	negative	not set	not set	yes	strong	75%-25%	cytoplasmic	yes	moderate	75%-25%	cytoplasmic	yes	negative	not set	not set	yes	strong	75%-25%	cytoplasmic
ENSG00000172939	CAB017181	yes	strong	>75%	cytoplasmic	yes	negative	not set	not set	yes	negative	not set	not set	yes	negative	not set	not set	yes	negative	not set	not set	yes	negative	not set	not set	yes	strong	>75%	cytoplasmic	yes	strong	>75%	cytoplasmic
ENSG00000152495	HPA017206	yes	moderate	>75%	cytoplasmic	yes	moderate	>75%	cytoplasmic,membrane	yes	negative	not set	not set	yes	negative	not set	not set	yes	negative	not set	not set	yes	moderate	>75%	cytoplasmic	yes	weak	>75%	cytoplasmic	yes	negative	not set	not set
ENSG00000213462	HPA017209	yes	moderate	>75%	cytoplasmic	yes	strong	>75%	cytoplasmic,membrane	yes	strong	75%-25%	nuclear	yes	negative	not set	not set	yes	negative	not set	not set	yes	strong	>75%	nuclear	yes	negative	not set	not set	yes	negative	not set	not set
ENSG00000081307	HPA017235	yes	moderate	>75%	cytoplasmic	yes	moderate	75%-25%	cytoplasmic	yes	moderate	>75%	cytoplasmic	yes	negative	not set	not set	yes	negative	not set	not set	yes	moderate	75%-25%	cytoplasmic	yes	weak	>75%	cytoplasmic	yes	negative	not set	not set
ENSG00000118046	HPA017254	yes	moderate	>75%	cytoplasmic	yes	negative	not set	not set	yes	negative	not set	not set	yes	negative	not set	not set	yes	negative	not set	not set	yes	negative	not set	not set	yes	moderate	75%-25%	cytoplasmic	yes	negative	not set	not set
ENSG00000157350	HPA017270	yes	strong	>75%	cytoplasmic	yes	negative	not set	not set	yes	negative	not set	not set	yes	negative	not set	not set	yes	negative	not set	not set	yes	negative	not set	not set	yes	moderate	>75%	cytoplasmic	yes	negative	not set	not set
ENSG00000154511	HPA017281	yes	weak	>75%	cytoplasmic,membrane	yes	strong	>75%	cytoplasmic,membrane	yes	strong	75%-25%	cytoplasmic,membrane	yes	negative	not set	not set	yes	negative	not set	not set	yes	strong	>75%	cytoplasmic,membrane	yes	negative	not set	not set	yes	negative	not set	not set
ENSG00000154645	HPA017282	yes	weak	>75%	cytoplasmic,membrane	yes	strong	>75%	cytoplasmic,membrane	yes	moderate	<25%	cytoplasmic,membrane	yes	negative	not set	not set	yes	strong	75%-25%	cytoplasmic,membrane	yes	weak	<25%	cytoplasmic,membrane	yes	negative	not set	not set	yes	moderate	>75%	cytoplasmic,membrane
ENSG00000138385	HPA017287	yes	strong	75%-25%	nuclear	yes	negative	not set	not set	yes	moderate	>75%	nuclear	yes	negative	not set	not set	yes	strong	>75%	nuclear	yes	strong	75%-25%	nuclear	yes	moderate	>75%	nuclear	yes	strong	>75%	nuclear
ENSG00000172995	HPA017303	yes	negative	not set	not set	yes	negative	not set	not set	yes	negative	not set	not set	yes	negative	not set	not set	yes	negative	not set	not set	yes	moderate	<25%	nuclear	yes	negative	not set	not set	yes	negative	not set	not set
ENSG00000197601	HPA017322	yes	moderate	>75%	cytoplasmic	yes	negative	not set	not set	yes	negative	not set	not set	yes	negative	not set	not set	yes	negative	not set	not set	yes	negative	not set	not set	yes	weak	75%-25%	cytoplasmic	yes	moderate	75%-25%
ENSG00000122786	HPA017330	yes	moderate	75%-25%	cytoplasmic	yes	moderate	75%-25%	cytoplasmic	yes	negative	not set	not set	yes	strong	>75%	cytoplasmic	yes	negative	not set	not set	yes	negative	not set	not set	yes	moderate	75%-25%	cytoplasmic	yes	negative	not set	not set
ENSG00000161904	HPA017340	yes	strong	>75%	cytoplasmic,membrane,nuclear	yes	negative	not set	not set	yes	moderate	>75%	membrane,nuclear	yes	negative	not set	not set	yes	moderate	>75%	membrane,nuclear	yes	moderate	>75%	membrane,nuclear	yes	moderate	>75%	membrane,nuclear	yes	moderate	>75%	membrane,nuclear
ENSG00000145012	HPA017342	yes	moderate	75%-25%	cytoplasmic	yes	negative	not set	not set	yes	negative	not set	not set	yes	moderate	75%-25%	cytoplasmic	yes	negative	not set	not set	yes	negative	not set	not set	yes	negative	not set	not set	yes	negative	not set	not set
ENSG00000162300	HPA017347	yes	moderate	<25%	cytoplasmic	yes	strong	75%-25%	cytoplasmic	yes	negative	not set	not set	yes	negative	not set	not set	yes	negative	not set	not set	yes	negative	not set	not set	yes	negative	not set	not set	yes	negative	not set	not set
ENSG00000133106	HPA017362	yes	weak	>75%	cytoplasmic,membrane	yes	moderate	>75%	cytoplasmic,membrane	yes	moderate	>75%	cytoplasmic,membrane	yes	negative	not set	not set	yes	moderate	75%-25%	cytoplasmic	yes	strong	>75%	cytoplasmic,membrane	yes	negative	not set	not set	yes	strong	>75%	cytoplasmic,nuclear
ENSG00000139644	HPA017378	yes	moderate	>75%	cytoplasmic	yes	weak	75%-25%	cytoplasmic	yes	negative	not set	not set	yes	negative	not set	not set	yes	negative	not set	not set	yes	moderate	<25%	nuclear	yes	negative	not set	not set	yes	negative	not set	not set
ENSG00000159267	HPA017379	yes	strong	>75%	cytoplasmic	yes	moderate	<25%	cytoplasmic	yes	negative	not set	not set	yes	negative	not set	not set	yes	weak	<25%	cytoplasmic	yes	negative	not set	not set	yes	negative	not set	not set	yes	strong	75%-25%	cytoplasmic
ENSG00000131446	HPA017432	yes	weak	75%-25%	cytoplasmic	yes	negative	not set	not set	yes	moderate	<25%	cytoplasmic	yes	negative	not set	not set	yes	negative	not set	not set	yes	negative	not set	not set	yes	negative	not set	not set	yes	negative	not set	not set
ENSG00000158301	HPA017438	yes	weak	75%-25%	cytoplasmic	yes	strong	>75%	nuclear	yes	moderate	75%-25%	cytoplasmic,membrane	yes	negative	not set	not set	yes	moderate	75%-25%	nuclear	yes	strong	>75%	nuclear	yes	negative	not set	not set	yes	moderate	75%-25%	cytoplasmic,nuclear
ENSG00000100644	CAB017442	yes	negative	not set	not set	yes	negative	not set	not set	yes	strong	>75%	cytoplasmic,membrane	yes	negative	not set	not set	yes	strong	<25%	cytoplasmic,membrane	yes	negative	not set	not set	yes	negative	not set	not set	yes	strong	<25%	cytoplasmic,membrane
ENSG00000168439	CAB017448	yes	negative	not set	not set	yes	negative	not set	not set	yes	negative	not set	not set	yes	negative	not set	not set	yes	negative	not set	not set	yes	negative	not set	not set	yes	negative	not set	not set	yes	strong	>75%	cytoplasmic
ENSG00000132002	CAB017450	yes	weak	<25%	cytoplasmic	yes	negative	not set	not set	yes	strong	75%-25%	nuclear	yes	negative	not set	not set	yes	strong	75%-25%	nuclear	yes	negative	not set	not set	yes	strong	>75%	cytoplasmic,nuclear	yes	negative	not set	not set
ENSG00000054118	CAB017472	yes	negative	not set	not set	yes	negative	not set	not set	yes	moderate	75%-25%	nuclear	yes	negative	not set	not set	yes	moderate	<25%	nuclear	yes	negative	not set	not set	yes	negative	not set	not set	yes	strong	75%-25%	nuclear
ENSG00000183020	CAB017514	yes	strong	>75%	cytoplasmic	yes	negative	not set	not set	yes	negative	not set	not set	yes	moderate	<25%	cytoplasmic	yes	negative	not set	not set	yes	negative	not set	not set	yes	strong	>75%	cytoplasmic	yes	negative	not set	not set
ENSG00000149480	CAB017522	yes	strong	75%-25%	nuclear	yes	negative	not set	not set	yes	strong	75%-25%	nuclear	yes	negative	not set	not set	yes	strong	>75%	nuclear	yes	negative	not set	not set	yes	strong	>75%	nuclear	yes	strong	>75%	nuclear
ENSG00000117650	CAB017530	yes	negative	not set	not set	yes	negative	not set	not set	yes	moderate	>75%	cytoplasmic,membrane	yes	negative	not set	not set	yes	negative	not set	not set	yes	negative	not set	not set	yes	negative	not set	not set	yes	moderate	75%-25%	nuclear
ENSG00000169744	CAB017544	yes	moderate	>75%	nuclear	yes	negative	not set	not set	yes	strong	75%-25%	nuclear	yes	negative	not set	not set	yes	strong	75%-25%	nuclear	yes	strong	75%-25%	nuclear	yes	negative	not set	not set	yes	strong	75%-25%	nuclear
ENSG00000094916	CAB017548	yes	negative	not set	not set	yes	negative	not set	not set	yes	weak	<25%	nuclear	yes	negative	not set	not set	yes	weak	<25%	nuclear	yes	negative	not set	not set	yes	negative	not set	not set	yes	moderate	<25%	nuclear
ENSG00000107562	CAB017564	yes	moderate	75%-25%	cytoplasmic	yes	moderate	<25%	cytoplasmic	yes	moderate	<25%	cytoplasmic	yes	negative	not set	not set	yes	moderate	<25%	cytoplasmic,nuclear	yes	moderate	<25%	cytoplasmic	yes	negative	not set	not set	yes	strong	<25%	cytoplasmic,nuclear
ENSG00000182022	HPA017584	yes	moderate	>75%	cytoplasmic	yes	moderate	>75%	cytoplasmic,membrane	yes	moderate	75%-25%	cytoplasmic	yes	negative	not set	not set	yes	moderate	75%-25%	cytoplasmic	yes	negative	not set	not set	yes	negative	not set	not set	yes	moderate	75%-25%	cytoplasmic
ENSG00000173598,ENSG00000177144	HPA017593	yes	weak	>75%	cytoplasmic	yes	weak	>75%	cytoplasmic	yes	strong	<25%	cytoplasmic	yes	negative	not set	not set	yes	moderate	<25%	cytoplasmic	yes	strong	>75%	cytoplasmic	yes	negative	not set	not set	yes	moderate	<25%	cytoplasmic
ENSG00000188694	HPA017604	yes	negative	not set	not set	yes	strong	75%-25%	nuclear	yes	negative	not set	not set	yes	negative	not set	not set	yes	negative	not set	not set	yes	negative	not set	not set	yes	negative	not set	not set	yes	negative	not set	not set
ENSG00000164022	CAB017618	yes	weak	75%-25%	cytoplasmic	yes	weak	75%-25%	cytoplasmic	yes	weak	75%-25%	cytoplasmic	yes	negative	not set	not set	yes	negative	not set	not set	yes	negative	not set	not set	yes	weak	75%-25%	cytoplasmic	yes	moderate	75%-25%	cytoplasmic
ENSG00000100167	CAB017633	yes	negative	not set	not set	yes	negative	not set	not set	yes	negative	not set	not set	yes	negative	not set	not set	yes	negative	not set	not set	yes	negative	not set	not set	yes	strong	>75%	cytoplasmic	yes	negative	not set	not set
ENSG00000080166	CAB017634	yes	moderate	>75%	cytoplasmic,membrane	yes	negative	not set	not set	yes	negative	not set	not set	yes	negative	not set	not set	yes	negative	not set	not set	yes	negative	not set	not set	yes	moderate	>75%	cytoplasmic,membrane	yes	negative	not set	not set
ENSG00000112033	CAB017635	yes	negative	not set	not set	yes	negative	not set	not set	yes	negative	not set	not set	yes	negative	not set	not set	yes	moderate	75%-25%	nuclear	yes	negative	not set	not set	yes	negative	not set	not set	yes	strong	>75%	nuclear
ENSG00000003147	HPA017646	yes	negative	not set	not set	yes	negative	not set	not set	yes	negative	not set	not set	yes	strong	>75%	cytoplasmic	yes	negative	not set	not set	yes	negative	not set	not set	yes	negative	not set	not set	yes	negative	not set	not set
ENSG00000183098	HPA017671	yes	moderate	>75%	cytoplasmic	yes	negative	not set	not set	yes	negative	not set	not set	yes	negative	not set	not set	yes	negative	not set	not set	yes	negative	not set	not set	yes	moderate	>75%	cytoplasmic	yes	moderate	75%-25%	cytoplasmic
ENSG00000213088	HPA017672	yes	negative	not set	not set	yes	negative	not set	not set	yes	negative	not set	not set	yes	negative	not set	not set	yes	negative	not set	not set	yes	negative	not set	not set	yes	negative	not set	not set	yes	moderate	<25%	nuclear
ENSG00000075568	HPA017678	yes	weak	75%-25%	cytoplasmic	yes	negative	not set	not set	yes	negative	not set	not set	yes	negative	not set	not set	yes	negative	not set	not set	yes	negative	not set	not set	yes	weak	<25%	cytoplasmic	yes	negative	not set	not set
ENSG00000105894	CAB017685	yes	negative	not set	not set	yes	negative	not set	not set	yes	strong	75%-25%	cytoplasmic,membrane	yes	negative	not set	not set	yes	negative	not set	not set	yes	negative	not set	not set	yes	negative	not set	not set	yes	negative	not set	not set
ENSG00000185507	CAB017694	yes	strong	>75%	nuclear	yes	negative	not set	not set	yes	negative	not set	not set	yes	negative	not set	not set	yes	moderate	75%-25%	nuclear	yes	negative	not set	not set	yes	moderate	75%-25%	nuclear	yes	moderate	75%-25%	nuclear
ENSG00000125686	CAB017696	yes	moderate	75%-25%	nuclear	yes	negative	not set	not set	yes	negative	not set	not set	yes	negative	not set	not set	yes	strong	<25%	nuclear	yes	negative	not set	not set	yes	negative	not set	not set	yes	moderate	<25%	nuclear
ENSG00000079435	CAB017700	yes	weak	<25%	cytoplasmic	yes	strong	>75%	cytoplasmic	yes	weak	75%-25%	cytoplasmic	yes	negative	not set	not set	yes	negative	not set	not set	yes	moderate	75%-25%	cytoplasmic	yes	negative	not set	not set	yes	negative	not set	not set
ENSG00000157077	CAB017702	yes	moderate	>75%	cytoplasmic	yes	negative	not set	not set	yes	moderate	<25%	cytoplasmic,membrane	yes	negative	not set	not set	yes	strong	75%-25%	cytoplasmic,membrane	yes	negative	not set	not set	yes	negative	not set	not set	yes	strong	75%-25%	cytoplasmic,membrane
ENSG00000104691	HPA017725	yes	strong	>75%	cytoplasmic	yes	negative	not set	not set	yes	negative	not set	not set	yes	negative	not set	not set	yes	negative	not set	not set	yes	negative	not set	not set	yes	strong	>75%	cytoplasmic	yes	strong	<25%	cytoplasmic
ENSG00000158158	HPA017732	yes	negative	not set	not set	yes	strong	>75%		yes	strong	75%-25%		yes	negative	not set	not set	yes	negative	not set	not set	yes	strong	>75%		yes	negative	not set	not set	yes	negative	not set	not set
ENSG00000164081	HPA017739	yes	weak	75%-25%	cytoplasmic	yes	negative	not set	not set	yes	strong	>75%	cytoplasmic	yes	negative	not set	not set	yes	negative	not set	not set	yes	strong	<25%	cytoplasmic	yes	weak	75%-25%	cytoplasmic	yes	negative	not set	not set
ENSG00000132437	HPA017742	yes	moderate	75%-25%	cytoplasmic,membrane	yes	negative	not set	not set	yes	negative	not set	not set	yes	negative	not set	not set	yes	negative	not set	not set	yes	negative	not set	not set	yes	moderate	>75%	cytoplasmic,membrane	yes	negative	not set	not set
ENSG00000143199	HPA017749	yes	weak	>75%	cytoplasmic	yes	negative	not set	not set	yes	moderate	>75%	cytoplasmic	yes	negative	not set	not set	yes	negative	not set	not set	yes	moderate	>75%	cytoplasmic	yes	negative	not set	not set	yes	negative	not set	not set
ENSG00000167654	HPA017755	yes	moderate	<25%	cytoplasmic	yes	negative	not set	not set	yes	negative	not set	not set	yes	negative	not set	not set	yes	negative	not set	not set	yes	negative	not set	not set	yes	moderate	<25%	cytoplasmic,membrane	yes	negative	not set	not set
ENSG00000158169	CAB017793	yes	moderate	>75%	cytoplasmic	yes	moderate	>75%	cytoplasmic	yes	moderate	>75%	cytoplasmic	yes	moderate	75%-25%	cytoplasmic	yes	moderate	>75%	cytoplasmic	yes	moderate	>75%	cytoplasmic	yes	moderate	>75%	cytoplasmic	yes	strong	75%-25%	cytoplasmic
ENSG00000118058	CAB017794	yes	moderate	>75%	cytoplasmic,nuclear	yes	weak	75%-25%	cytoplasmic,membrane	yes	strong	75%-25%	cytoplasmic	yes	negative	not set	not set	yes	negative	not set	not set	yes	moderate	>75%	cytoplasmic	yes	negative	not set	not set	yes	moderate	75%-25%	nuclear
ENSG00000115421	CAB017795	yes	moderate	75%-25%	cytoplasmic	yes	moderate	75%-25%	cytoplasmic,membrane	yes	negative	not set	not set	yes	negative	not set	not set	yes	negative	not set	not set	yes	weak	75%-25%	nuclear	yes	negative	not set	not set	yes	strong	>75%
ENSG00000149948	CAB017809	yes	negative	not set	not set	yes	negative	not set	not set	yes	negative	not set	not set	yes	negative	not set	not set	yes	strong	75%-25%	nuclear	yes	negative	not set	not set	yes	negative	not set	not set	yes	strong	>75%	nuclear
ENSG00000024526	CAB017845	yes	moderate	<25%	cytoplasmic,nuclear	yes	weak	<25%	nuclear	yes	strong	>75%	nuclear	yes	negative	not set	not set	yes	strong	>75%	nuclear	yes	strong	>75%	nuclear	yes	negative	not set	not set	yes	strong	>75%	nuclear
ENSG00000100207	CAB017849	yes	moderate	>75%	cytoplasmic	yes	moderate	>75%	cytoplasmic	yes	weak	75%-25%	nuclear	yes	negative	not set	not set	yes	moderate	<25%	nuclear	yes	moderate	<25%	nuclear	yes	moderate	>75%	cytoplasmic	yes	moderate	<25%	cytoplasmic,nuclear
ENSG00000101079	HPA017851	yes	weak	75%-25%	cytoplasmic	yes	strong	75%-25%	cytoplasmic	yes	strong	<25%	cytoplasmic	yes	negative	not set	not set	yes	moderate	<25%	nuclear	yes	strong	<25%	cytoplasmic	yes	negative	not set	not set	yes	negative	not set	not set
ENSG00000170099	HPA017864	yes	moderate	75%-25%	cytoplasmic,membrane	yes	negative	not set	not set	yes	strong	75%-25%	nuclear	yes	moderate	75%-25%	cytoplasmic,membrane	yes	strong	75%-25%	nuclear	yes	strong	75%-25%	nuclear	yes	negative	not set	not set	yes	strong	75%-25%	nuclear
ENSG00000124784	HPA017866	yes	negative	not set	not set	yes	negative	not set	not set	yes	negative	not set	not set	yes	negative	not set	not set	yes	negative	not set	not set	yes	negative	not set	not set	yes	negative	not set	not set	yes	strong	>75%	cytoplasmic
ENSG00000087191	HPA017871	yes	strong	>75%	nuclear	yes	moderate	<25%	cytoplasmic	yes	negative	not set	not set	yes	negative	not set	not set	yes	strong	75%-25%	nuclear	yes	negative	not set	not set	yes	strong	<25%	nuclear	yes	strong	>75%	nuclear
ENSG00000126777	HPA017876	yes	strong	>75%	cytoplasmic	yes	strong	>75%	cytoplasmic	yes	strong	>75%	cytoplasmic	yes	strong	>75%	cytoplasmic	yes	strong	>75%	cytoplasmic	yes	strong	>75%	cytoplasmic	yes	strong	>75%	cytoplasmic	yes	strong	>75%	cytoplasmic
ENSG00000119820	HPA017884	yes	moderate	>75%	cytoplasmic	yes	moderate	>75%	cytoplasmic	yes	moderate	>75%	cytoplasmic	yes	negative	not set	not set	yes	moderate	>75%	cytoplasmic	yes	strong	>75%	cytoplasmic	yes	weak	>75%	cytoplasmic	yes	strong	>75%	cytoplasmic
ENSG00000180773	HPA017887	yes	strong	>75%	cytoplasmic	yes	negative	not set	not set	yes	negative	not set	not set	yes	negative	not set	not set	yes	negative	not set	not set	yes	negative	not set	not set	yes	moderate	>75%	cytoplasmic	yes	negative	not set	not set
[truncated: 4,272 more rows]
